# Supplementary material for: First Data on Ornithodoros moubata Aquaporins: Structural, Phylogenetic and Immunogenic Characterisation as Vaccine Targets
Source: MDPI journal article supplement (doi:10.3390/pathogens11060694), 2022-06-16
Supplement: s1 [file s1]

|                  |                                     |                |                              |                          |         |       |     |
|------------------|-------------------------------------|----------------|------------------------------|--------------------------|---------|-------|-----|
| XP_037510829.1   | VQPLFIGLALGALILCFGYNC               | GA             | PLNPA                        | DLGPRVFTAMAGWGVEVFSYRDYN | NFWVPIV | 239   |     |
| XP_037510831.1   | VQPLFIGLALGALILCFGYNC               | GA             | PLNPA                        | DLGPRVFTAMAGWGVEVFSYRDYN | NFWVPIV | 239   |     |
| XP_037510826.1   | VQPLFIGLALGALILCFGYNC               | GA             | PLNPA                        | DLGPRVFTAMAGWGVEVFSYRDYN | NFWVPIV | 239   |     |
| CAR66115.1       | VQPLFIGLALGALILCFGYNC               | GA             | PLNPA                        | DLGPRVFTAMAGWGVEVFSYRDYN | NFWVPIV | 239   |     |
| XP_037292104.1   | VQPLFIGLALGALILCFGYNC               | GA             | PLNPA                        | DLGPRVFTAMAGWGVEVFSYRDYN | NFWVPIV | 239   |     |
| XP_037292102.1   | VQPLFIGLALGALILCFGYNC               | GA             | PLNPA                        | DLGPRVFTAMAGWGVEVFSYRDYN | NFWVPIV | 239   |     |
|                  | :***:***:*.:                        |                | *****.**:**:*:**.***:*****:* |                          |         |       |     |
| OmAQP23          | APHIGAIVGAWLYRLLVGLHWPQDSYDMEQNRNAK | DGGY           | ----                         | SLE                      | -----   | 282   |     |
| OmAQP15          | APHIGAIVGTWLYRLLVGLHWPQDSYDMEQNRNAK | DEYM           | ----                         | PIGGYDAPKEQQSASS         |         | 296   |     |
| A0A2R5L6A3_9ACAR | APHIGAVVGTWLYKLLVGLHWPQDSYDMDQGR    | RDKGGY         | ----                         | TLERN                    | -----   | 284   |     |
| A0A293N0K9_ORNER | APHIGAVVGTWLYRLLVGLHWPQDSYDMEQGR    | RSKDGGY        | ----                         | TLESRN                   | -----   | 285   |     |
| A0A293MWN9_ORNER | APHIGAVVGTWLYRLLVGLHWPQDSYDMEQGR    | RSKDEYL        | ----                         | PVRGDDGAPPERGLDLS        |         | 296   |     |
| A0A1D2AI66_ORNBR | APHILGAIIGTWLYKLMVGLHWPQDSYDMEQGR   | GKDDGGY        | ----                         | SLEGRN                   | -----   | 282   |     |
| XP_037563610.1   | GPHIGAIVGAWLYMLAVELHWP              | PGSSYDMDSGNAVS | SAKDVENVIQMRGIKQCEIKN        | ----                     |         | 294   |     |
| XP_037563613.1   | GPHIGAIVGAWLYMLAVELHWP              | PGSSYDMDSGNAVS | SAKDDAYGQ                    | --                       | DGVRM   | ----- | 287 |
| XP_037563615.1   | GPHIGAIVGAWLYMLAVELHWP              | PGSSYDMDSGNAVS | SAKDETVST                    | --                       | M       | ----- | 283 |
| XP_037510825.1   | GPHIGAIVGAWLYTLAVELHWP              | PGSSYDMDSGNTV  | SAKDVENVIQMRGIKQCELKN        | ----                     |         | 294   |     |
| XP_037510829.1   | GPHIGAIVGAWLYTLAVELHWP              | PGSSYDMDSGNTV  | SAKDDGIGPDSVRM               | -----                    |         | 287   |     |
| XP_037510831.1   | GPHIGAIVGAWLYTLAVELHWP              | PGSSYDMDSGNTV  | SAKDEPVSSM                   | -----                    |         | 283   |     |
| XP_037510826.1   | GPHIGAIVGAWLYTLAVELHWP              | PGSSYDMDSGNTV  | SAKDAPRFQLANQNEAIF           | -----                    |         | 291   |     |
| CAR66115.1       | GPHIGAIVGAWLYTLAVELHWP              | PGSSYDMDSGNTV  | SAKDAPRFQLANQNEAIF           | -----                    |         | 291   |     |
| XP_037292104.1   | GPHIGAIVGAWLYTLAVELHWP              | PGSSYDMDSGNAVS | SAKDEPVSSK                   | -----                    |         | 283   |     |
| XP_037292102.1   | GPHIGAIVGAWLYTLAVELHWP              | PGSSYDMDSGNAVS | SAKDDGIGQDSVRM               | -----                    |         | 287   |     |
|                  | .**:**:*.**:** *                    | *****          | .****:.                      |                          |         |       |     |
| OmAQP23          | -----                               |                |                              |                          |         | 282   |     |
| OmAQP15          | PNEKQSKV                            | -----          |                              |                          |         | 304   |     |
| A0A2R5L6A3_9ACAR | -----                               |                |                              |                          |         | 284   |     |
| A0A293N0K9_ORNER | -----                               |                |                              |                          |         | 285   |     |
| A0A293MWN9_ORNER | SSTHEKRPQSGTGGSGNGTNRRS             |                |                              |                          |         | 319   |     |
| A0A1D2AI66_ORNBR | -----                               |                |                              |                          |         | 282   |     |
| XP_037563610.1   | -----                               |                |                              |                          |         | 294   |     |
| XP_037563613.1   | -----                               |                |                              |                          |         | 287   |     |
| XP_037563615.1   | -----                               |                |                              |                          |         | 283   |     |
| XP_037510825.1   | -----                               |                |                              |                          |         | 294   |     |
| XP_037510829.1   | -----                               |                |                              |                          |         | 287   |     |
| XP_037510831.1   | -----                               |                |                              |                          |         | 283   |     |
| XP_037510826.1   | -----                               |                |                              |                          |         | 291   |     |
| CAR66115.1       | -----                               |                |                              |                          |         | 291   |     |
| XP_037292104.1   | -----                               |                |                              |                          |         | 283   |     |
| XP_037292102.1   | -----                               |                |                              |                          |         | 287   |     |
