# Supplementary material for: First Data on Ornithodoros moubata Aquaporins: Structural, Phylogenetic and Immunogenic Characterisation as Vaccine Targets
Source: MDPI journal article supplement (doi:10.3390/pathogens11060694), 2022-06-16
Supplement: s1 [file s1]

**Figure S5.** Alignment of the amino acid sequences included in clade AQP<sub>Ae.a</sub>. The amino acids conserved in all the sequences are labelled with asterisks (\*); the conservative and semi-conservative substitutions are labelled with colons (:) and periods (.), respectively. The NPA motifs are highlighted in yellow and the residues within the ar/R constriction are highlighted in green. The predicted immunogenic peptides from OmAQP91 are highlighted in underlined red letters and their homologous regions in the remaining clade members are highlighted in plain red letters.

|                  |                                                                 |                              |     |
|------------------|-----------------------------------------------------------------|------------------------------|-----|
| OmAQP91          | MGRVRQFRSIFGIDELSATSTLWKSMAIEYIGTAMLVFIA                        | <u>CGTCTNWGRGG</u> ----EPSIA | 56  |
| A0A293MYA1_ORNER | MGRVRQFRSVFGIDELSATSTLWKAMIAEYIGTAVLVFIA                        | <u>CGTCTNWGRPG</u> ----EPSIT | 56  |
| XP_029833586.1   | MGRVRQFRNLGIDEVSASSTLWKSMAEYIGTAVIVLIG                          | <u>CGSCINWGSPTKPLGEATMV</u>  | 60  |
| XP_037582105.1   | MGRVRQFRSFCGIDEVSATSSLWKSMAEYIGTAVIVLIG                         | <u>CGSCINWGSPEKPQGEATMV</u>  | 60  |
| XP_037502974.1   | MGRVRQFRSFCGIDEVSATSSLWKSMAEYIGTAVIVLIG                         | <u>CGSCINWGSPEKPQGEATMV</u>  | 60  |
| XP_037283568.1   | MGRVRQFRSFCGIDEVSATSSLWKSMAEYIGTAVIVLIG                         | <u>CGSCINWGSPEKPQGEATMV</u>  | 60  |
|                  | *****. . ****:*:*:*:*:*:*:*:*:*:*:*:*:*:*                       | * : : .                      |     |
| OmAQP91          | QIALSFAFIVATMAQALGHVSGAHINPAVTMGMLCVGHISILRAFFYICSQLIGGITGAA    |                              | 116 |
| A0A293MYA1_ORNER | QIALSFAFIVATMAQALGHVSGAHINPAVTMGMLCVGHISILRAFFYICSQLIGGITGAA    |                              | 116 |
| XP_029833586.1   | QIAIGFGITVATMAQAVGHVSGAHLNPAVTMGMLFVGKVSILRSFFYICSQLIGGITGAA    |                              | 120 |
| XP_037582105.1   | QIAIGFGITVATMVQALGHVSGGHLNPAVTIGMLFVGRVSLLRSSFFYLCSQLIGGITGAA   |                              | 120 |
| XP_037502974.1   | QIAIGFGITVASMVQALGHVSGGHLNPAVTIGMLFVGRVSLLRSSFFYLCSQLIGGITGAA   |                              | 120 |
| XP_037283568.1   | QIAIGFGITVASMVQALGHVSGGHLNPAVTIGMLFVGRVSLLRSSFFYLCSQLIGGITGAA   |                              | 120 |
|                  | ***:.. . **:*,**:*:*:*:*:*:*:*:*:*:*:*:*:*                      |                              |     |
| OmAQP91          | VLRAVTPEERQGLLGGTALSEGVTFFQGVVVELVITFILVLTTFVAVCDQNRLDVLGSPPL   |                              | 176 |
| A0A293MYA1_ORNER | ILRAVTPEDRQGLGGLKLDGVTFFQGVVVELMITFILVLTTFVAVCDQNRLDILGSAPL     |                              | 176 |
| XP_029833586.1   | ILRAVTPDARHGALGGTGLAEGVTPLMGLAVEVCITFILVLTTFVAVCDTNRLDVQGSAPL   |                              | 180 |
| XP_037582105.1   | ILRAVTPEARHGALGGTSLAEGVTPLMGLGVEACITFILVLTTFVAVCDTNRLDVQGSAPL   |                              | 180 |
| XP_037502974.1   | ILRAVTPEARHGALGGTSLAEGVTPLMGLGVEACITFILVLTTFVAVCDTNRLDVQGSAPL   |                              | 180 |
| XP_037283568.1   | ILRAVTPEARHGALGGTSLAEGVTPLMGLGVEACITFILVLTTFVAVCDANRLDVQGSAPL   |                              | 180 |
|                  | :*****: :*: * **** *:*****: *: ** *****.* ** *****: ** **       |                              |     |
| OmAQP91          | AIGLAVGAGLMLVIGYTASMNNTATFGPAVISGAFDDHWVYWLGPIGGGILAGFVYQYV     |                              | 236 |
| A0A293MYA1_ORNER | AIGLSVGAGLMAIGYTASMNNTATFGPAVISGAFDDHWVYWLGPIGGGILAGFVYQYV      |                              | 236 |
| XP_029833586.1   | AIGLSVTTCHVFAVRYTAGMNVASFGPAVMSGIFDDHWVFWVGPILGGIIAAVIYENV      |                              | 240 |
| XP_037582105.1   | AIGLSVTTCHVFAVRYTAGMNVASFGPAVMSGMFDDHWVFWLGPILGGVIAAVVYENV      |                              | 240 |
| XP_037502974.1   | AIGLSVTTCHVFAVRYTAGMNVASFGPAVMSGMFDDHWVFWLGPILGGVIAAVVYENV      |                              | 240 |
| XP_037283568.1   | AIGLSVTTCHVFAVRYTAGMNVASFGPAVMSGMFDDHWVFWLGPILGGVIAAVVYENV      |                              | 240 |
|                  | *****:* : : : : *****.***:*:*:*:*:******:*:*:*:*:*: . . . : : * |                              |     |
| OmAQP91          | LSAPPISFEALDKAQLACLARFHNKEAVEDRTTAI                             | 271                          |     |
| A0A293MYA1_ORNER | FSAPAITSEALDKAQLASLAKFNNKEVVEDRTTSI                             | 271                          |     |
| XP_029833586.1   | FQAPPITTEELDKAQITAMAKLANKEVVADRTTSI                             | 275                          |     |
| XP_037582105.1   | FQAPPITSEDLDKAQITVMAKLANKEVVADRTTSI                             | 275                          |     |
| XP_037502974.1   | FQAPPITTEDLDKAQITVMAKLANKEVVADRTTSI                             | 275                          |     |
| XP_037283568.1   | FQAPPITSEDLDKAQIMAMAKLTNKEVVADRTTSI                             | 275                          |     |
|                  | :.* * : * *****: : : : *****.******.*                           |                              |     |
