# Supplementary material for: First Data on Ornithodoros moubata Aquaporins: Structural, Phylogenetic and Immunogenic Characterisation as Vaccine Targets
Source: MDPI journal article supplement (doi:10.3390/pathogens11060694), 2022-06-16

**Figure S9.** 3D models for OmaAQP15. (a) and (b) Side and top view, respectively, of the monomer cartoon showing the position of the two NPA motifs (red spheres) and the aromatic arginine (ar/R) constriction (orange spheres); (c) and (d) side and top view of the tetramer cartoon; (e) monomer mesh and surface model showing the exposure of the 3 antigenic peptides on the extracellular surface of the molecule: OmaAQP15\_A yellow, OmaAQP15\_C orange, and OmaAQP15\_E cyan. (f) side and top view of tetramer surface model showing peptide exposure.

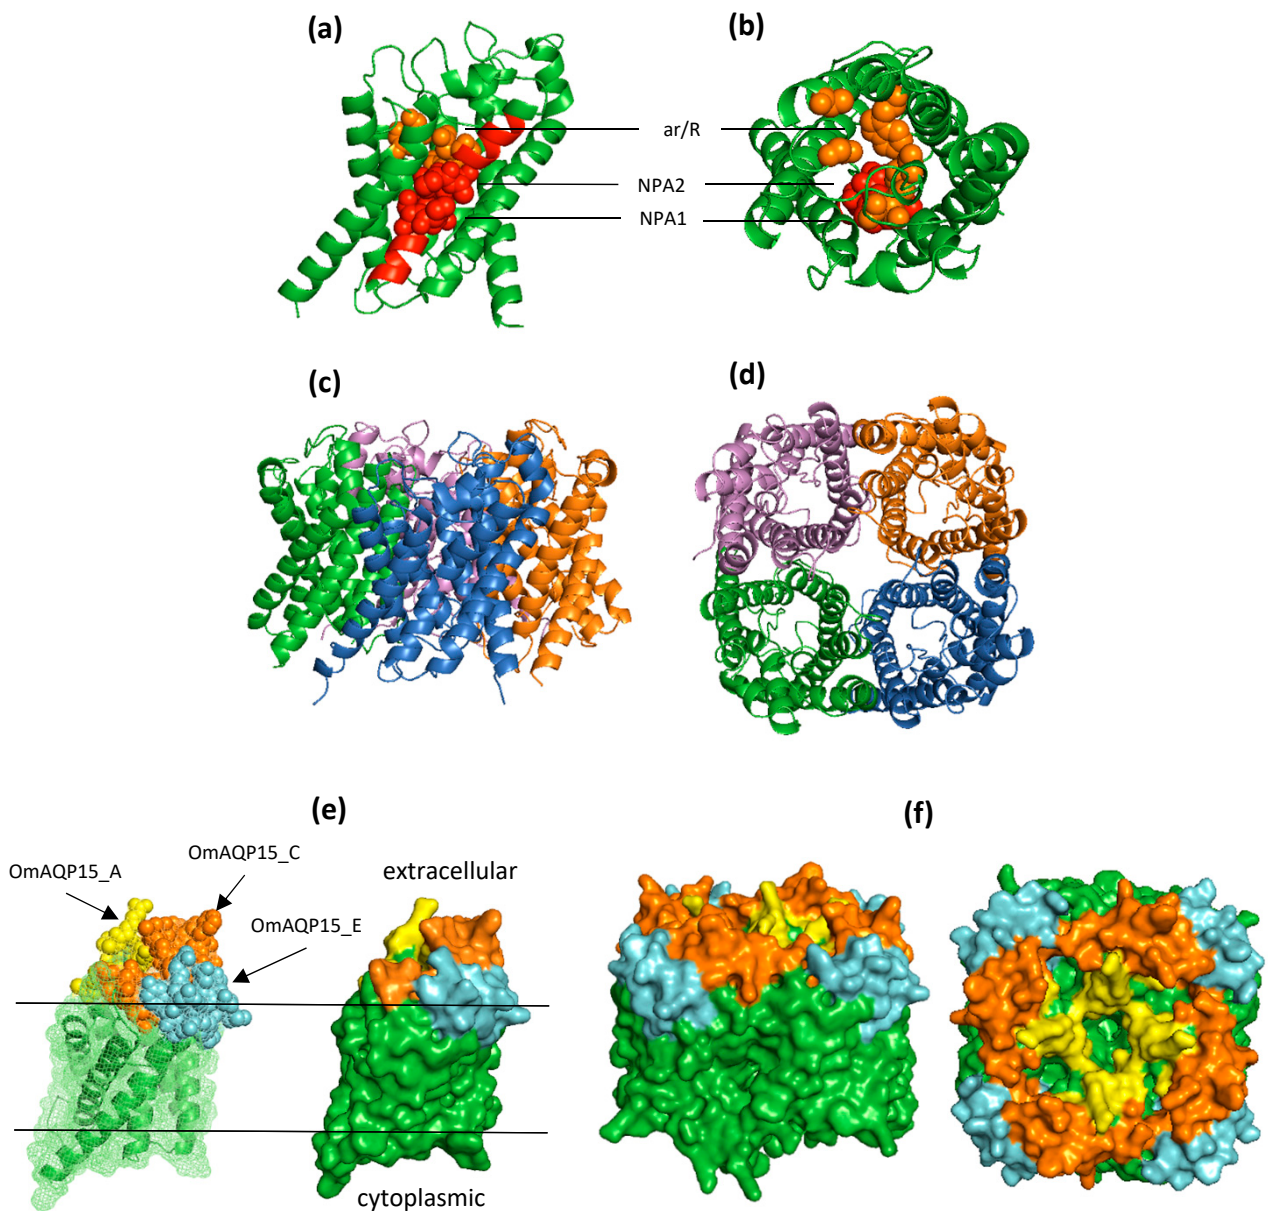

Supplement: s1 [file s1]
