# Supplementary material for: First Data on Ornithodoros moubata Aquaporins: Structural, Phylogenetic and Immunogenic Characterisation as Vaccine Targets
Source: MDPI journal article supplement (doi:10.3390/pathogens11060694), 2022-06-16
Supplement: s1 [file s1]

**Figure S4.** Alignment of the amino acid sequences included in clade AQP7/AQP9/AQP3. The amino acids conserved in all the sequences are labelled with asterisks (\*); the conservative and semi-conservative substitutions are labelled with colons (:) and periods (.), respectively. The NPA motifs are highlighted in yellow, the residues within the ar/R constriction are highlighted in green, and the aspartic acid downstream the second NPA motif is highlighted in gray. The predicted immunogenic peptides from OmAQP97 are highlighted in underlined red letters and their homologous regions in the remaining clade members are highlighted in plain red letters.

|                  |                                                                |     |
|------------------|----------------------------------------------------------------|-----|
| OmAQP97          | ---MANPPFPFMKRFVIKSPVLREFLAEEFFGTFLYIFGGASFAHYIFSGQKDVLAVTFC   | 57  |
| A0A293N0E3_ORNER | ---MANPPYPFLKRFVIRSPAVREFLAEEFFGTFLYIFGGASFAHYIFGNQKDVLAVTFC   | 57  |
| A0A2R5L6Q7_9ACAR | ---MANPPYPFLKRFVIKSPALREFLAEEFFGTFLYIFGGASFAHYIFGNQKDVLAVTFC   | 57  |
| XP_029845129.1   | ---MGNPPPPFFKKFVTTNQAVREFLAEEFFGTFLYIFGGASFAHYLFTDNKDVFAVTFC   | 57  |
| XP_037563616.1   | MASAGNPPFPFLRKLVTKNEAVKEFLAEFFGTFLYIFGGASFAHFLFTDSKDVFAVTFC    | 60  |
| XP_037292097.1   | MASAGNPPFPFLRKVFTKNEAVKEFLAEFLGTFLYIFGGASFAHFLFTDQKDVFAVTFC    | 60  |
| XP_037292096.1   | MASAGNPPFPFLRKVFTKNEAVKEFLAEFLGTFLYIFGGASFAHFLFTDQKDVFAVTFC    | 60  |
| XP_037509276.1   | -----MEVKMFGGASFAHFLFTDQKDVFAVTFC                              | 28  |
| XP_037510820.1   | MASAGNPPFPFLRKVFTKNEAVKEFLAEFLGTFLYIFGGASFAHFLFTDQKDVFAVTFC    | 60  |
| XP_037510819.1   | MASAGNPPFPFLRKVFTKNEAVKEFLAEFLGTFLYIFGGASFAHFLFTDQKDVFAVTFC    | 60  |
| CAX48963.1       | MASAGNPPFPFLRKVFTKNEAVKEFLAEFLGTFLYIFGGASFAHYLFTAQKDVFAATFC    | 60  |
|                  | : : :******: : * .***:*.***                                    |     |
| OmAQP97          | WGMGVMLGIQTGAGVSGGHVNPVVTTFASVGRLPWKVPVHYLLGQHLGAFLASAILYFN    | 117 |
| A0A293N0E3_ORNER | WGMGVMLGIQTGAGVSGGHVNPVVTTSFASVGRLPWRKVPHYILGQHLGAFLASAILYFN   | 117 |
| A0A2R5L6Q7_9ACAR | WGMGVMLGIQTGAGVSGGHVNPVVTTSFASVGRLPWRKVPHYILGQHLGAFVASAILYFN   | 117 |
| XP_029845129.1   | WGIGVMLGIQTGAGVSGGHVNPIVTTSFASVGKLPWRKVPHYLLGQHLGAFLAAILYFN    | 117 |
| XP_037563616.1   | WGIGVMLGIQTGAGVSGGHVNPVVTTSFASIGKLPWRKVPHYMLGQHLGAFLASAILYFN   | 120 |
| XP_037292097.1   | WGIGVMLGIQTGAGVSGGHVNPIVTTSFASVGKLPWRKVPHYILGQHLGAFLASAILYFN   | 120 |
| XP_037292096.1   | WGIGVMLGIQTGAGVSGGHVNPVVTTSFASVGKLPWRKVPHYILGQHLGAFLASAILYFN   | 120 |
| XP_037509276.1   | WGIGVMLGIQTGAGVSGGHVNPIVTTSFASVGKLPWRKVPHYILGQHLGAFLASAILYFN   | 88  |
| XP_037510820.1   | WGIGVMLGIQTGAGVSGGHVNPVVTTSFASVGKLPWRKVPHYILGQHLGAFLASAILYFN   | 120 |
| XP_037510819.1   | WGIGVMLGIQTGAGVSGGHVNPIVTTSFASVGKLPWRKVPHYILGQHLGAFLASAILYFN   | 120 |
| CAX48963.1       | WGIGVMLGIQTGAGVSGGHVNPVVTTSFASVGKLPWRKVPHYILGQHLGAFLASAILYFN   | 120 |
|                  | **.:*****:*** ***:*.***:*****:*****:*.*****                    |     |
| OmAQP97          | YIDALDHYDGGGERQIFGDRGTGILLTTFPNEHVHLSICIFDITIICSGLLMFTIMVIIDNK | 177 |
| A0A293N0E3_ORNER | YVDVLDDHYDGGTRQIFGVNGTGILLTTFPNEHVHLSICIFDITIICSGLLMFTIMVIIDNK | 177 |
| A0A2R5L6Q7_9ACAR | YIDVLDHYDGGGERQIFGNKGTGILLTTFPNEHVHLSICIFDITIICSGLLMFTIMVIIDNK | 177 |
| XP_029845129.1   | YIDLLDKFDGGARQIFGTNGTGILLSTYPHPDVHLSVCVFDTIICSGLLMFTIMVILDDR   | 177 |
| XP_037563616.1   | YIDLLDSVDGGERQIFGNKGTGILLTTPNDNVHLSVCVFDTIICSGLLMFTIMVILDDR    | 180 |
| XP_037292097.1   | YIDLLDSVDGGERQIFGNKGTGILLTTPNDNVHLSVCVFDTIICSGLLMFTIMVILDDR    | 180 |
| XP_037292096.1   | YIDLLDSVDGGERQIFGNKGTGILLTTPNDNVHLSVCVFDTIICSGLLMFTIMVILDDR    | 180 |
| XP_037509276.1   | YIDLLDSVDGGERQIFGNKGTGILLTTPNDNVHLSVCVFDTIICSGLLMFTIMVILDDR    | 148 |
| XP_037510820.1   | YIDLLDSVDGGERQIFGNKGTGILLTTPNDNVHLSVCVFDTIICSGLLMFTIMVILDDR    | 180 |
| XP_037510819.1   | YIDLLDSVDGGERQIFGNKGTGILLTTPNDNVHLSVCVFDTIICSGLLMFTIMVILDDR    | 180 |
| CAX48963.1       | YIDLLDSVDGGERQIFGNKGTGILLTTPNDNVHLSVCVFDTIICSGLLMFTIMVILDDR    | 180 |
|                  | *:* ** *** *****.***:***:***:*.***:*****:*****:*.***           |     |
| OmAQP97          | NANTTSGMHAFLIGIMVVALCWAFTGNCMAAVNPADFPPRVLASIVGYGPEVFTYRHF     | 237 |
| A0A293N0E3_ORNER | NANTTAGMHAFLIGIMVIALCWAFTGNCMAAINPADFPPRVLASIVGYGPEVFTYRHF     | 237 |
| A0A2R5L6Q7_9ACAR | NANTTAGMHAFLIGIMVIALCWAFTGNCMAAINPADFPPRVLASIVGYGPEVFTYRHF     | 237 |
| XP_029845129.1   | NANTTKGMHAFLIGIMVVALCWAFTGNCMAAVNPADFPPRVLSALVGYGAETFSYRQFW    | 237 |
| XP_037563616.1   | NANTTKGMHAFLIGIMVVALCWAYGANCMAAVNPADFPPRVLSALVGYGAETFTFRNFW    | 240 |
| XP_037292097.1   | NANTTKGMHAFLIGIMVVALCWAYGANCMAAVNPADFPPRVLSALVGYGAESFTFRNFW    | 240 |
| XP_037292096.1   | NANTTKGMHAFLIGIMVVALCWAYGANCMAAVNPADFPPRVLSALVGYGAESFTFRNFW    | 240 |
| XP_037509276.1   | NANTTKGMHAFLIGIMVVALCWAYGANCMAAVNPADFPPRVLSALVGYGAESFMFRNFW    | 208 |
| XP_037510820.1   | NANTTKGMHAFLIGIMVVALCWAYGANCMAAVNPADFPPRVLSALVGYGAESFTFRNFW    | 240 |
| XP_037510819.1   | NANTTKGMHAFLIGIMVVALCWAYGANCMAAVNPADFPPRVLSALVGYGAESFTFRNFW    | 240 |
| CAX48963.1       | NANTTKGMHAFLIGIMVVALCWAYGANCMAAVNPADFPPRVLSALVGYGAESFMFRNFW    | 240 |
|                  | ***** *****:*****:*.***:*.***:***** ***: :***** * * :*:**      |     |
| OmAQP97          | WIPMFIPHVGGGLIGTWLYVLAIEMHIVPERVRDDRTEREMTNLLPLPPRTEKTGV----   | 292 |
| A0A293N0E3_ORNER | WIPMFIPHVGGGLIGTWLYVLAIEMHIVPERARDDRTEREMTNLLPLPPRTEKPAI----   | 292 |
| A0A2R5L6Q7_9ACAR | WIPMFIPHVGGGLIGTWLYVLAIEMHIRPERLHDDRAEREMTNLLPLPPRTEKSAA----   | 292 |
| XP_029845129.1   | WIPLFVPHLGGFLIGTWLYVLFVGMHIKPKRRDGD--EKEVVNLLPLAPRADKTS-----   | 290 |
| XP_037563616.1   | WIPMFVPHLGGGLIGTWLYVLGVGMHISKQSK-D--GPEGVNLLPLAPRADKTV-----    | 292 |
| XP_037292097.1   | WIPMFVPHLGGGLIGTWLYVLCIGMHISKQSR-D--GPEGVNLLPLAPRADKTA-----    | 292 |
| XP_037292096.1   | WIPMFVPHLGGGLIGTWLYVLCIGMHISKQSR-D--GPEGVNLLPLAPRAGESTGNTGVY   | 297 |
| XP_037509276.1   | WIPMFVPHLGGGLIGTWLYVLCIGMHISKQSK-D--GPEGVNLLPLAPRADKVA-----    | 260 |
| XP_037510820.1   | WIPMFVPHLGGGLIGTWLYVLCIGMHISKQSK-D--GPEGVNLLPLAPRADKVA-----    | 292 |
| XP_037510819.1   | WIPMFVPHLGGGLIGTWLYVLCIGMHISKQSK-D--GPEGVNLLPLAPRAGESTGNTGVY   | 297 |
| CAX48963.1       | WIPMFVPHLGGGLIGTWLYVLCIGMHISKQSK-D--GPEGVNLLPLAPRAGESTGNTGVY   | 297 |
|                  | ***:*.***:***:***** : *** : * * .***** **: :                   |     |

|                  |                                       |     |
|------------------|---------------------------------------|-----|
| OmAQP97          | -----                                 | 292 |
| A0A293N0E3_ORNER | -----                                 | 292 |
| A0A2R5L6Q7_9ACAR | -----                                 | 292 |
| XP_029845129.1   | -----                                 | 290 |
| XP_037563616.1   | -----                                 | 292 |
| XP_037292097.1   | -----                                 | 292 |
| XP_037292096.1   | TVGLHSAVYHIADNKGTNANIASPGVPAGNVSEEKVK | 334 |
| XP_037509276.1   | -----                                 | 260 |
| XP_037510820.1   | -----                                 | 292 |
| XP_037510819.1   | TVGLRSAVYHITDDRGTHAIVASPGVPAANIEEKIK  | 334 |
| CAX48963.1       | TVGLRSAVYHITDDRGTHANVASPGVPAANIEEKIK  | 334 |
