# Supplementary material for: First Data on Ornithodoros moubata Aquaporins: Structural, Phylogenetic and Immunogenic Characterisation as Vaccine Targets
Source: MDPI journal article supplement (doi:10.3390/pathogens11060694), 2022-06-16
Supplement: s1 [file s1]

**Figure S1.** Nucleotide (a) and amino acid (b) sequences of the seven *Ornithodoros moubata* AQP<sub>s</sub> amplified by PCR. (c) Nucleotide sequence alignments of the amplified *O. moubata* AQP<sub>s</sub> with each corresponding transcript as obtained by RNA-seq.

**a**

>OmAQP90

ATGAAGGTGTACATTTCGGAGTCTGCTTCTAAGAGAACTCATCAATGAGTTCATTGGAACGATGCTGCTCA  
TTCTAATCGGTGACTCCATCATGGCCATTATCATCGCGGGTCGTGAGGAAGAGAATGGTCATGTGATCGG  
TCCCCCTCGGATGGGGTACAGCCATCTTCTGCGCAGTCTTCGTGGCGGGAGGAGTGTGAGCCACATCAAC  
CCTGCTGTGACGCTGGCCTTCGCTTCCGTCAAAGAGTTTCCCTCTCAAGAAAGTGCCCTTATTTTGGCTCG  
CCCAGTACTTGGGTGCCTTTGTGGGTGCCGTGCTCGTCTATGTCATCTATAGAGATGCCATCAACATGTT  
TGACGGCGGGGTTCGTTCCGTGGTTCGGACCCACTGGTACTGCTTCCATATTCTCGACGTATCCACGAGAG  
GGCGTCTCTACGCTCACCTGCTTCTTCGACCAGGTCAATTTCCACGGCCGTCTCTACGCTCACGGTTGCAG  
CAATAGTGAGACGAGCGAACTTTGCCGTCCCCAAAGCCCTCGTTCCCTCTCATGCTTGGCATGTTGATCGT  
TGCCGAGATTTTTCCTTCTCTATAACTGCATGGCTGCTCTGAATCCGGCCCCGAGACATTGGACCGCGG  
GTGTTACCGCTGTGCTGGATGGGGTTCGGAGGTCTTCAAGTTTTCGCAACTACAGTGGGTGTGGGTGC  
CCATCTTTGGTCTCACATTGGGGCCATTGTCGGGGTATGGATATACAAGCTCTGCATAGGGGACCATTG  
GCCAATAGAGACGACGCTGCACTGAAACAAGTACTTTTCATCATCGAATGACAAGAGCGGACCTGCTGCG  
GAGCCCCAAAGAGACAACCAACATCTAG

>Om20812

ATGAAGATACAGAGCACATTCGTGAGGGAACCTCATCAACGAATTTCTCGGAACATTTACGCTCATAGTAT  
TTGGAGATTCTGTGATGGCCATAATCACTGCAGGACGGCAGGAACACAATGCAGGAATCATCGGCCCTGT  
AGGTTGGGGTACTGCTATCTTTTGCGCCGTCACTGTGTCTGGGGGAGTTTCAGCCCACTTAAACCCAGCA  
GTAACGCTAGCGTTGGCGTCCGTGAAGAAGTTTCCGATCAAGAAAGTTCCGCTCTTCTTCGTGGCGCAGT  
ACACGGGAGCATTCTTTGCCGTGCGGTTGTTTTTGCAATCTACAGGGACGCCATTGATGCTGTGGACAG  
CGGGGTGCGTTCACTACTGGGTCCAACCTGGTACTGCTCCCATATTCGCCACGTATCCCCGTGAGGGAATT  
TCCACGCTCACTTGCTTCATTGATCAGGTTGTTGCAACAGGCTGCTTGGTACTGACTGCTGAAGCGATCA  
CCGACCCGCGCAACTTCGGAGGACTGCCGAAGCCCTTTTACCCCTGGCACTGGGCCTCATGATCAGCGC  
CGAGATTTTGTCTTTTCTTACAACTGCATGGCTCCTCTGAACCCGGCTCGAGATCTCGGTCTTAGGGTA  
TTCACAGCAATTGCTGGTTGGGGCATGGAGGTTTTTCAGTGTGCGCGACTATGTGTGGATGTTTTGTGCCCA  
TTTTTCGCCCCCTCATGTTGGAGGCGTGCTTGGTGCCTGGACTTACAAAGTCTGCGTAGAAGACAATTGGCC  
AGAAGAGGAACCTACCGTCATTCTTCCCGTCAGCACGAGTAAGAATTTCAGAGCTAGGCCCACTTGGCTG  
TGA

>Om22982

ATGAAGATACAGAGCACATTCGTGAGGGAACCTCATCAACGAATTTCTCGGAACATTTACGCTCATAGTAT  
TTGGAGATTCTGTGATGGCCATAATCATTCAGGACGGCAGGAACACAATGCAGGAATCATCGGCCCTGT  
AGGTTGGGGTACTGCTATCTTTTGCGCCGTCACTGTGTCTGGGGGAGTTTCAGCCCACTTAAACCCAGCA  
GTAACGCTAGCGTTGGCGTCCGTGAAGAAGTTTCCGATCAAGAAAGTTCCGCTCTTCTTCGTGGCGCAGT  
ACACGGGAGCATTCTTTGCCGTGCGGTTGTTTTTGCAATATACAGGGACGCCATTGATGCTGTGGACAG  
CGGGGTGCGTTCACTACTGGGTCCAACCTGGTACTGCTCCCATATTCGCCACGTATCCCCGTGAGGGAATT  
TCCACGCTCACTTGCTTCATTGATCAGGTTGTTTACAACAGGCTGCTTGGTACTGACTGCTGAAGCGATCA  
CCGACCCGCGCAACTTCGGAGGACTGCCGAAGCCCTTTTACCCCTGGCACTGGGCCTCATGATCAGCGC  
CGAGATTTTGTCTTTTCTTACAACTGCATGGCTCCTCTGAACCCGGCTCGAGATCTCGGTCTTAGGGTA  
TTCACAGCAATTGCTGGTTGGGGCATGGAGGTTTTTCAGTGTGCGCGACTATGTGTGGATGTTTTGTGCCCA  
TTTTTCGCCCCCTCATGTTGGAGGCGTGCTTGGTGCCTGGACTTACAAAGTCTGCGTAGAAGACAATTGGCC  
AGAAGAGGAACCTACCGTCATTCTTCCCGTCAGCACGAGTAAGAATTTCAGAGCTAGGTACGACTGCGTCC  
GCGGAAATGAATATTTTATTTCAGCTGCGATAGTTGTGTATAG

>OmAQP91

ATGGGCCGTGTTTCGCCAATTCCGCTCAATATTTGGCATCGACGAGCTGTCGGCTACGAGCACGCTCTGGA  
AATCAATGATCGCCGAATACATCGGCACGGCCATGCTAGTTTTTCATAGCATGCGGAACATGCACCAACTG  
GGGTCGAGGGGAGAACCCAGCATCGCTCAGATTGCGCTCAGTTTTCGCTTTCATCGTGGCAACCATGGCT  
CAAGCCCTGGGTCATGTCAGCGGAGCGCACATCAACCCAGCGGTGACGATGGGAATGCTGTGCGTCGGCC  
ATATCTCCATTCTCCGAGCCTTCTTCTATATCTGCAGTCAGCTCATTGGAGGTATCACTGGAGCAGCCGT  
ACTGAGGGCCGTGACACCAGAAGAGCGCCAGGGACTCCTGGGAGGCACGGCACTTTCGGAGGGAGTGACA  
CCGTTTCAAGGCGTCGTAGTCGAGCTCGTGATCACTTTCATTCTCGTCTTGACCGTCTTTGCCGTTTGCG  
ACCAGAACAGGCTGGACGTCCTGGGATCTCCTCCGCTGGCCATCGGCCCTCGCGGTTGGTGCCGGTCATCT  
TATGGTGATTGGCTACACAGGAGCCAGCATGAACACAGCCCGTACATTGGGCCAGCTGTAATCTCAGGA  
GCCTTCGATGACCATTGGGTGTACTGGCTTGGCCCCATTGGTGGTGGTATTCTGGCTGGCTTTGTCTACC  
AGTACGTCCTCTCTGCTCCACCAATATCCTTCGAAGCTCTGGATAAGGCCAGCTGGCGTGTCTGGCAAG  
GTTTCAACAACAAGGAAGCCGTCGAGGACCGCACCCACGGCCATCTGA

>OmAQP97

ATGGCAAACCCACCGTTCCCTTTTCATGAAGAGATTTGTTCATCAAGAGCCCAGTGTTGCGAGAGTTTCTGG  
CGGAGTTCTTCGGCACTTTTATCCTTTATATTTTCGGCGGTGCATCGTTCGCTCACTACATTTTCAGCGG  
TCAGAAAAGATGTGTTGGCGGTGACCTTCTGCTGGGGCATGGGAGTCATGCTCGGCATTCAAACCGGCGCT  
GGAGTTTCCGGGGGTACAGTGAATCCCGTCGTAACCACTCCGTTTTCGAGCGTGGGTAGACTTCCCTGGA  
AGAAAGTACCCCACTATCTCTTAGGTCAACATCTGGGAGCCTTTCTGGCATCTGCTATCCTCTACTTCAA  
TTATATCGATGCGCTGGACCATATGATGGAGGTGAAAGACAGATATTTGGCGATAGAGGAACGGGAATA  
CTTCTGACCACGTTCCCAATGAACATGTCCACCTCTCCATTTGCATATTCGACACGATCATCTGCTCAG  
GCTTGCTCATGTTTACCATCATGGTGATTATCGATAACAAGAACGCGAACACGACATCTGGAATGCACGC  
TTTCTTATATCGGGATCATGGTGATGGCGTTGTGCTGGGCCTTCGGCACCAACTGCATGGCTGCCGTCAAC  
CCTGCCAGGGATTTCCCAACACGTGTTCTTGCTTCCATTGTGGGATATGGACCCGAAGTGTTTACGTATC  
GACACTTCTGGTGATTCCGATGTTTATTTCCCATGTTGGGGGACTCATCGGCACATGGCTGTACGTGCT  
AGCTATTGAGATGCACATAGTGCCAGAAAGGGTACGGGACGATAGGACTGAGCGGGAGATGACCAACTTA  
TTACCGCTTCCACCGAGGACAGAAAAGACCGGTGTCTAA

>OmAQP23

ATGATTCTGGATAAAGTGAAGATTAAGAGCCTGGCTCTGCGGGAGACGTTCCGCCGAACCTTCTGGGCACCT  
TCGTGCTTGTGCTGTTTCGGTACCGGAGTCTTGGCAGCCCTGAAGTTTCGACAGAGCTGGAAACATTGGCTA  
CGCCGCCGGTTTCTGGGGTTGGGGTTTGGCTCTTGGAATGGGAGTGCTCGTCTCTGGTGGAGCGTCAGGT  
GCCCACCTGAACCCGTCTATTACCGTTGCCCTTGGCAACCATCGGAAAATGCCAGTGGAGAAAAGTGCCAC  
ATTACCTGGTAGCCAGTACTTAGGTGCCTTCCCTTGGAGCTGCCGTGCTCTTCTTGACATACAAGGTGC  
GTTTCGACAACTATGACGGTGTTTTTCGTGCGACTACCGGTGTGAACGGAACGGCGGATGTGTTTCGCTTCA  
TATCCCAGAGACTTCGTTGGCACTGGGAACCTGCTTTTTTGGACCAGGTCGTTCGGGACTGGTCTCTTTGTGA  
TGTGCATCGTGGCTATCACAGACAACCACAACATGGCAGTGCCTCAAGGTCTGCAACCTCTGTTGATCGG  
CCTTTCTTTGGCAACGACTGCTCTCTGCTTCGGCTACAACCTGTGGTGCTCCCTCAACCCAGCCCAGAT  
TTGGGACCACGTATCTTCACTGCCATGGCTGGGTGGGGAACAGAGGTCTTCAGCTTCCGAGACTACAAC  
GGTCTGGGTGCCGGTAGTGGCGCCCCACATCGGAGCCATCGTTGGAGCATGGCTGTACAGACTCCTGGT  
TGGCCTCCACTGGCCTCAAGACTCGTACGACATGGAACAGAGGAACAGGGCCAAGGATGGTGGGTATTCC  
CTCGAATGA

>OmAQP15

ATGATTCTGGATAAAGTGAAGATTAAGAGCCTGGCTCTGCGGGAGACGTTCCGCCGAACCTTCTGGGCACCT  
ACGTGCTTGTGCTGTTTCGGTACCGGAGTCTTGGCAGCCCTGAAGTTTCGACAGAGCTGGAAACATTGGCTA  
CGCCGCCGGTTTCTGGGGTTGGGGTTTGGCTCTTGGAATGGGAGTGCTCGTCTCTGGTGGAGCGTCAGGT  
GCCCACCTGAACCCGTCTATTACCGTTGCCCTTGGCAACCATCGGAAAATGCCAGTGGAGAAAAGTGCCAC  
ATTACCTGGTAGCCAGTACTTAGGTGCCTTCCCTTGGAGCTGCCGTGCTCTTCTTGACATACAAGGTGC  
GTTTCGACAACTATGACGGTGTTTTTCGTGCGACTACCGGTGTGAACGGAACGGCGGATGTGTTTCGCTTCA  
TATCCCAGAGACTTCGTTGGCACTGGGAACCTGCTTTTTTGGACCAGGTCGTTCGGGACTGGTCTCTTTGTGA  
TGTGCATCGTGGCTATCACAGACAACCACAACATGGCAGTGCCTCAAGGTCTGCAACCTCTGTTGATCGG

CCTTTCTTTGGCAACGACTGCTCTCTGCTTCGGCTACAACCTGTGGTGCTCCCCCAACCCAGCCCCGAGAT  
TTGGGACCACGTATCTTCACTGCCATGGCTGGGTGGGGAACAGAGGTCTTCAGCTTCCGAGACTACAACCT  
GGTTCTGGGTGCCGGTAGTGGCGCCCCACATCGGAGCCATCGTTGGAACATGGCTGTACAGACTCCTGGT  
TGGCCTCCACTGGCCTCAAGACTCGTACGACATGGAACAGAGGAACAGGGCCAAGGATGAATACATGCCA  
ATCGGAGGTTACGATGCTGCGCCAAAAGGAACAACATCAGCCTCATCTCCGAACGAAAAACAGTCGAAGG  
TCTAG

**b**

>OmAQP90

MKVYIRSLLLRELINEFIGTMLLILIGDSIMAI I IAGRQEENGHVIGPLGWGTAFCAV FVAGGVSAHIN  
PAVTLAFASVKEFPLKKVPLFWLAQYLGA FVGAVLVYVIYRDAINMFDGGVRSVVGPTGTASIFSTYPRE  
GVSTLTCCFFDQVISTAVLTLTVAAIVDERNF AVPKALVPLMLGMLIVAEI FAFSYNCMAALNPARDIGPR  
VFTAVAGWGSEVFSFRNYQVWVPIFGPHIGAIVGVWIYKLCIGDHWPIETTPALKQVLSSNDKSGPAA  
EPKETTN I

>Om20812 (MBZ3958194)

MKIQSTFVRELINEFLGTFTLIVFGDSVMAI I IAGRQEHNAGI IGPVGWGTAFCAVTVSGGVSAHLNPA  
VTLALASVKKFP I KKVPLFFVAQYTGAFFAAAVFAIYRDAIDAVDSGVRSVLGPTGTAPIFATYPREGI  
STLTCTCFIDQVVATGCLVLTAEAITDPRNF GGLPKPFYPLALGLMISAEI FAFSYNCMAPLNPARDLGPRV  
FTAIAGWGMEVFSVRD YVWMFVPIFAPHVGGVLGAWTYKVCVEDNWPEEEPTVILPVSTSKNSELGPTWL

>Om22982 (MBZ3960076)

MKIQSTFVRELINEFLGTFTLIVFGDSVMAI I IAGRQEHNAGI IGPVGWGTAFCAVTVSGGVSAHLNPA  
VTLALASVKKFP I KKVPLFFVAQYTGAFFAAAVFAIYRDAIDAVDSGVRSVLGPTGTAPIFATYPREGI  
STLTCTCFIDQVVTGCLVLTAEAITDPRNF GGLPKPFYPLALGLMISAEI FAFSYNCMAPLNPARDLGPRV  
FTAIAGWGMEVFSVRD YVWMFVPIFAPHVGGVLGAWTYKVCVEDNWPEEEPTVILPVSTSKNSELGTTAS  
AEMNILFSCDSCV

>OmAQP91 (A0A1Z5L1C7)

MGRVRQFRSIFGIDELSATSTLWKS MIAEYIGTAMLVFIACGTCTNWGRGGEPSIAQIALSF AFIVATMA  
QALGHVSGAHINPAVTMGMLCVGHISILRAFFYICSQLIGGITGA AVLRAVTPEERQGLLG GTALSEGVT  
PFQGVVVELVITFILVLTVFAVCDQNR LDVLSPP LAIGLAVGAGHLMVIGYTGASMNTARTFGPAVISG  
AFDDHWVYWLGP IGGGILAGFVYQVLSAPPISFEALDKAQLACLARFHNKEAVEDRTTAI

>OmAQP97 (A0A1Z5L6U6)

MANPPFPFMKRFVIKSPVLREFLAEFFGT F ILYIFGGASFAHYIFSGQKDVLA VTFCWGMGVM LGIQTGA  
GVSGGHVNPVVTTPFASVGRLPWKKVPHYLLGQHLGAFLASAILYFNYIDALDHYD GGERQIFGDRGTGI  
LLTTFPNEHVHLSICIFDTI ICSGLLMFTIMV I IDNKNANTTSGMHAF LIGIMVMALCWA FG TNCMAAVN  
PARDFPPRVLASIVGYGPEVF TYRHFWWIPMFI PHVGGLIGTWLYVLA IEMHI VPERVRDDRTEREMTNL  
LPLPPRTEKTGV

>OmAQP23 (A0A1Z5L547)

MILDKVKIKSLALRETFAELLGT FVLVLFGTGVLAALKFD RAGNIGYAAGFWGWGLALGMGV LVSGGASG  
AHLNPSITVALATIGKCQWRKVPHYLVAQYLGAFLGAAVLFLTYKGAFDNYDGGFRATTGVNGTADV FAS  
YPRDFVGTGNCFLDQVVG TGLFVMCIVAITDNHNM AVPQGLQPLLIGLSLATTALCFGYNC GAPLNPARD  
LGPRIFTAMAGWGTEVFSFRDYNWFVVPV VAPHIGAIVGAWLYRLLVGLHWPQDSYDMEQRNRAKDG GYS  
LE

>OmAQP15 (A0A1Z5KVQ3)

MILDKVKIKSLALRETFAELLGT YVLVLFGTGVLAALKFD RAGNIGYAAGFWGWGLALGMGV LVSGGASG  
AHLNPSITVALATIGKCQWRKVPHYLVAQYLGAFLGAAVLFLTYKGAFDNYDGGFRATTGVNGTADV FAS  
YPRDFVGTGNCFLDQVVG TGLFVMCIVAITDNHNM AVPQGLQPLLIGLSLATTALCFGYNC GAPLNPARD

**C**

[illegible]

1 10 20 30 40 50 60 70 80 90 100 110 120 130  
|-----|  
0n22982, ATGAGGATACAGGACACATTCTGACGGGACATCATCAGCAATTTCTCGGACCAATTAGCGCTATAGTATTGGAGATTCTGTCATGGCCATATCATCTGACGACGGCAGGACACATCGAGGAATCA  
OM\_22982 ATGAGGATACAGGACACATTCTGACGGGACATCATCAGCAATTTCTCGGACCAATTAGCGCTATAGTATTGGAGATTCTGTCATGGCCATATCATCTGACGACGGCAGGACACATCGAGGAATCA  
Consensus ATGAGGATACAGGACACATTCTGACGGGACATCATCAGCAATTTCTCGGACCAATTAGCGCTATAGTATTGGAGATTCTGTCATGGCCATATCATCTGACGACGGCAGGACACATCGAGGAATCA  
131 140 150 160 170 180 190 200 210 220 230 240 250 260  
|-----|  
0n22982, TCGGCCCTGTAGGTTGGGGTACTGCTATCTTTTGCGCCGCTCAGTGTCTGGGGGAGTTTCAGCCCACTTAARCCACAGCATAGCGTAGCGTTGGCGTCCGTGARGAGTTTCCGATCAGARAAGTTCC  
OM\_22982 TCGGCCCTGTAGGTTGGGGTACTGCTATCTTTTGCGCCGCTCAGTGTCTGGGGGAGTTTCAGCCCACTTAARCCACAGCATAGCGTAGCGTTGGCGTCCGTGARGAGTTTCCGATCAGARAAGTTCC  
Consensus TCGGCCCTGTAGGTTGGGGTACTGCTATCTTTTGCGCCGCTCAGTGTCTGGGGGAGTTTCAGCCCACTTAARCCACAGCATAGCGTAGCGTTGGCGTCCGTGARGAGTTTCCGATCAGARAAGTTCC  
261 270 280 290 300 310 320 330 340 350 360 370 380 390  
|-----|  
0n22982, GCTCTTCTTCGTGGCGACATACAGGAGCATCTTTTGCCGCTGCGGTTGTTTTCGATATACAGGAGCCCATATGATCTGTGGACAGCGGGGTGCTTACGATCTGAGTCTGAGTCTGCTCC  
OM\_22982 GCTCTTCTTCGTGGCGACATACAGGAGCATCTTTTGCCGCTGCGGTTGTTTTCGATATACAGGAGCCCATATGATCTGTGGACAGCGGGGTGCTTACGATCTGAGTCTGAGTCTGCTCC  
Consensus GCTCTTCTTCGTGGCGACATACAGGAGCATCTTTTGCCGCTGCGGTTGTTTTCGATATACAGGAGCCCATATGATCTGTGGACAGCGGGGTGCTTACGATCTGAGTCTGAGTCTGCTCC  
391 400 410 420 430 440 450 460 470 480 490 500 510 520  
|-----|  
0n22982, ATATTGCGCAGTATCCCGTGAGGGATTTCACGCTCAGTTGCTTATGATCAGGTTGTTCACAGGCTGCTTGGTACTGACTGCTGARGGATCAGCCGCCGACACTTCGAGAGACTGCCGA  
OM\_22982 ATATTGCGCAGTATCCCGTGAGGGATTTCACGCTCAGTTGCTTATGATCAGGTTGTTCACAGGCTGCTTGGTACTGACTGCTGARGGATCAGCCGCCGACACTTCGAGAGACTGCCGA  
Consensus ATATTGCGCAGTATCCCGTGAGGGATTTCACGCTCAGTTGCTTATGATCAGGTTGTTCACAGGCTGCTTGGTACTGACTGCTGARGGATCAGCCGCCGACACTTCGAGAGACTGCCGA  
521 530 540 550 560 570 580 590 600 610 620 630 640 650  
|-----|  
0n22982, AGCCCTTTTACCCCTGGCAGTGGGCTCATGATCAGCCGAGATTTCGCTTTTCTACACATGATGGCTCTTGACCCGGCTCGAGATCTCGGCTTAGGATTTACACAGATTTGCTGGTTG  
OM\_22982 AGCCCTTTTACCCCTGGCAGTGGGCTCATGATCAGCCGAGATTTCGCTTTTCTACACATGATGGCTCTTGACCCGGCTCGAGATCTCGGCTTAGGATTTACACAGATTTGCTGGTTG  
Consensus AGCCCTTTTACCCCTGGCAGTGGGCTCATGATCAGCCGAGATTTCGCTTTTCTACACATGATGGCTCTTGACCCGGCTCGAGATCTCGGCTTAGGATTTACACAGATTTGCTGGTTG  
651 660 670 680 690 700 710 720 730 740 750 760 770 780  
|-----|  
0n22982, GGGATGAGAGTTTTCAGTGTGCGCGACTATGTGTGATGTTTGTGCCATTTCGCCCTCATGTTGAGGCGTGCTTGGTGGCTGACTTACAAAGTCTGCGTAGAGACAAATGGCCAGAGAGGAA  
OM\_22982 GGGATGAGAGTTTTCAGTGTGCGCGACTATGTGTGATGTTTGTGCCATTTCGCCCTCATGTTGAGGCGTGCTTGGTGGCTGACTTACAAAGTCTGCGTAGAGACAAATGGCCAGAGAGGAA  
Consensus GGGATGAGAGTTTTCAGTGTGCGCGACTATGTGTGATGTTTGTGCCATTTCGCCCTCATGTTGAGGCGTGCTTGGTGGCTGACTTACAAAGTCTGCGTAGAGACAAATGGCCAGAGAGGAA  
781 790 800 810 820 830 840 850 860 870 88882  
|-----|  
0n22982, CCTACCGTATCTTCCGTCAGCAGGATAGAAATTCAGAGCTAGGTACGACTGCGTCCGGAATGATATTTTATTCAGCTGCGATAGTTGTGTATAG  
OM\_22982 CCTACCGTATCTTCCGTCAGCAGGATAGAAATTCAGAGCTAGGTACGACTGCGTCCGGAATGATATTTTATTCAGCTGCGATAGTTGTGTATAG  
Consensus CCTACCGTATCTTCCGTCAGCAGGATAGAAATTCAGAGCTAGGTACGACTGCGTCCGGAATGATATTTTATTCAGCTGCGATAGTTGTGTATAG

1 10 20 30 40 50 60 70 80 90 100 110 120 130  
|-----|  
0nAQP91 ATGGGCGGTGTTGCGCAATTCGCTCATATTGGCATCGACGAGCTGTGGCTACAGCAAGCTCTGGAATCATGATGCCGATACATCGGACGGCCATGCTAGTTTTCATAGCATCGGAGACAT  
ci1000124891 ATGGGCGGTGTTGCGCAATTCGCTCATATTGGCATCGACGAGCTGTGGCTACAGCAAGCTCTGGAATCATGATGCCGATACATCGGACGGCCATGCTAGTTTTCATAGCATCGGAGACAT  
Consensus ATGGGCGGTGTTGCGCAATTCGCTCATATTGGCATCGACGAGCTGTGGCTACAGCAAGCTCTGGAATCATGATGCCGATACATCGGACGGCCATGCTAGTTTTCATAGCATCGGAGACAT  
131 140 150 160 170 180 190 200 210 220 230 240 250 260  
|-----|  
0nAQP91 GCACCACTGGGGTCAGGGGGAGAACCCAGCATCGCTCAGATTGCGCTCAGTTTCGCTTTCATCTGTCGACCACTGGCTCAGGCCCTGGGTCATGTACGCGGAGCGCATCAACCCAGCGGTGACGAT  
ci1000124891 GCACCACTGGGGTCAGGGGGAGAACCCAGCATCGCTCAGATTGCGCTCAGTTTCGCTTTCATCTGTCGACCACTGGCTCAGGCCCTGGGTCATGTACGCGGAGCGCATCAACCCAGCGGTGACGAT  
Consensus GCACCACTGGGGTCAGGGGGAGAACCCAGCATCGCTCAGATTGCGCTCAGTTTCGCTTTCATCTGTCGACCACTGGCTCAGGCCCTGGGTCATGTACGCGGAGCGCATCAACCCAGCGGTGACGAT  
261 270 280 290 300 310 320 330 340 350 360 370 380 390  
|-----|  
0nAQP91 GGGATGCTGTGCGTGGCCTATATCTCCATCTCCGAGCCTCTTCTATATCTGAGTCAAGCTCATTGGAGGTATCACTGGAGCAGCCGATCTGAGGGCCGTGACACCGAGAGAGCGCCAGGATCTCTG  
ci1000124891 GGGATGCTGTGCGTGGCCTATATCTCCATCTCCGAGCCTCTTCTATATCTGAGTCAAGCTCATTGGAGGTATCACTGGAGCAGCCGATCTGAGGGCCGTGACACCGAGAGAGCGCCAGGATCTCTG  
Consensus GGGATGCTGTGCGTGGCCTATATCTCCATCTCCGAGCCTCTTCTATATCTGAGTCAAGCTCATTGGAGGTATCACTGGAGCAGCCGATCTGAGGGCCGTGACACCGAGAGAGCGCCAGGATCTCTG  
391 400 410 420 430 440 450 460 470 480 490 500 510 520  
|-----|  
0nAQP91 GGAGGACGGGACCTTCGAGGGGATGACACCGTTTCAGGGCGCTGATGTCAGCTCGTATGATCTTCATCTCGCTTTGACCGCTTTTGCCCTTTGACACAGACAGCGCTGGAGCTCTCGGATCTC  
ci1000124891 GGAGGACGGGACCTTCGAGGGGATGACACCGTTTCAGGGCGCTGATGTCAGCTCGTATGATCTTCATCTCGCTTTGACCGCTTTTGCCCTTTGACACAGACAGCGCTGGAGCTCTCGGATCTC  
Consensus GGAGGACGGGACCTTCGAGGGGATGACACCGTTTCAGGGCGCTGATGTCAGCTCGTATGATCTTCATCTCGCTTTGACCGCTTTTGCCCTTTGACACAGACAGCGCTGGAGCTCTCGGATCTC  
521 530 540 550 560 570 580 590 600 610 620 630 640 650  
|-----|  
0nAQP91 CTCGCTGGCATCGGCTCTCGGTTGGTGGGTCATCTTATGGTATTGGCTACACAGAGGACAGCATGACACAGCCCGATCTCGGCCAGCTGATCTCAGAGGCTTCGATGACCATTTGGGT  
ci1000124891 CTCGCTGGCATCGGCTCTCGGTTGGTGGGTCATCTTATGGTATTGGCTACACAGAGGACAGCATGACACAGCCCGATCTCGGCCAGCTGATCTCAGAGGCTTCGATGACCATTTGGGT  
Consensus CTCGCTGGCATCGGCTCTCGGTTGGTGGGTCATCTTATGGTATTGGCTACACAGAGGACAGCATGACACAGCCCGATCTCGGCCAGCTGATCTCAGAGGCTTCGATGACCATTTGGGT  
651 660 670 680 690 700 710 720 730 740 750 760 770 780  
|-----|  
0nAQP91 GTACTGGCTTGGCCCATTTGGTGGTATTCTGGCTGGCTTTGTCTACAGTACGCTCTCTCTGCTCCACCAATATCTTCAGAGCTCTGGATAGGCGCCAGCTGGCGTGTCTGGCAGGTTTTCACAC  
ci1000124891 GTACTGGCTTGGCCCATTTGGTGGTATTCTGGCTGGCTTTGTCTACAGTACGCTCTCTCTGCTCCACCAATATCTTCAGAGCTCTGGATAGGCGCCAGCTGGCGTGTCTGGCAGGTTTTCACAC  
Consensus GTACTGGCTTGGCCCATTTGGTGGTATTCTGGCTGGCTTTGTCTACAGTACGCTCTCTCTGCTCCACCAATATCTTCAGAGCTCTGGATAGGCGCCAGCTGGCGTGTCTGGCAGGTTTTCACAC  
781 790 800 810 816  
|-----|  
0nAQP91 AAGGAGCGCTCGAGGACCGACACGGCATCTGA  
ci1000124891 AAGGAGCGCTCGAGGACCGACACGGCATCTGA  
Consensus AAGGAGCGCTCGAGGACCGACACGGCATCTGA

1 10 20 30 40 50 60 70 80 90 100 110 120 130  
0hAQP97 ATGGCAAAACCCACCGTTCCCTTTTCATGAGAGATTGTGCATCAGAGGCCAGGTGTCGAGAGTTCTGCGGAGTCTTCGGACCTTTATCCTTTATATTTTCGGCGGTGCATCGTTCGCTCCTACRA  
ci1000113997 ATGGCAAAACCCACCGTTCCCTTTTCATGAGAGATTGTGCATCAGAGGCCAGGTGTCGAGAGTTCTGCGGAGTCTTCGGACCTTTATCCTTTATATTTTCGGCGGTGCATCGTTCGCTCCTACRA  
Consensus  
131 140 150 160 170 180 190 200 210 220 230 240 250 260  
0hAQP97 TTTTCAGCGGTCAGAGAGATGTGTGGCGGTGACCTTCTGCTGGGGCATGGAGTCATGCTCGGCATTCAAAACCGGCGCTGGAGTTCCGGGGGTACGCTGAATCCCGCTGTAACCACTCTGTTTGGGAG  
ci1000113997 TTTTCAGCGGTCAGAGAGATGTGTGGCGGTGACCTTCTGCTGGGGCATGGAGTCATGCTCGGCATTCAAAACCGGCGCTGGAGTTCCGGGGGTACGCTGAATCCCGCTGTAACCACTCTGTTTGGGAG  
Consensus  
261 270 280 290 300 310 320 330 340 350 360 370 380 390  
0hAQP97 CGTGAGTAGACTTCCCTGGAGAGAAATACCCCACTATCTCTTAGGTCACACCTTGGAGGCTTTCTGGCATCTGCTATCCTCTACTTCATTTATATCATGCTGCTGGACCATATGATGGAGGTGAAGA  
ci1000113997 CGTGAGTAGACTTCCCTGGAGAGAAATACCCCACTATCTCTTAGGTCACACCTTGGAGGCTTTCTGGCATCTGCTATCCTCTACTTCATTTATATCATGCTGCTGGACCATATGATGGAGGTGAAGA  
Consensus  
391 400 410 420 430 440 450 460 470 480 490 500 510 520  
0hAQP97 CHGATATTTGGCGATAGAGAACGGGATACCTTCTGACACGTTCCCAATGACATGTCCACCTTCCATTTGCATATTCGACACGATCATCTGCTAGGGCTTGCTCATGTTCCACCATCATGGTGATTA  
ci1000113997 CHGATATTTGGCGATAGAGAACGGGATACCTTCTGACACGTTCCCAATGACATGTCCACCTTCCATTTGCATATTCGACACGATCATCTGCTAGGGCTTGCTCATGTTCCACCATCATGGTGATTA  
Consensus  
521 530 540 550 560 570 580 590 600 610 620 630 640 650  
0hAQP97 TCGATACAGAGACCGACACGACATCTGGATGACGCTTTCCCTTTTCGGGATCATGGTGTGGCTGTGCTGGGGCTTCGGACCACTGCTATGGCTGCGCTACACCTTGCAGGGATTTCCCAAC  
ci1000113997 TCGATACAGAGACCGACACGACATCTGGATGACGCTTTCCCTTTTCGGGATCATGGTGTGGCTGTGCTGGGGCTTCGGACCACTGCTATGGCTGCGCTACACCTTGCAGGGATTTCCCAAC  
Consensus  
651 660 670 680 690 700 710 720 730 740 750 760 770 780  
0hAQP97 ACGTGTCTTGGCTTCCATTTGGGATATGAGACCGAGGTGTCAGCATGACACCTTCTGGTGGATTCGATGTTTCATTCCTCATGTTGGGGGACTCATCGGCACATGGCTAGCTGCTAGCTATTGAG  
ci1000113997 ACGTGTCTTGGCTTCCATTTGGGATATGAGACCGAGGTGTCAGCATGACACCTTCTGGTGGATTCGATGTTTCATTCCTCATGTTGGGGGACTCATCGGCACATGGCTAGCTGCTAGCTATTGAG  
Consensus  
781 790 800 810 820 830 840 850 860 870 879  
0hAQP97 ATGCACATAGTCCAGAAAGGGTACGGGACGATAGGACTGAGCGGAGATGACCACTATTACCGCTTCCACCGAGGACAGAAAGACCGGTGTCTAA  
ci1000113997 ATGCACATAGTCCAGAAAGGGTACGGGACGATAGGACTGAGCGGAGATGACCACTATTACCGCTTCCACCGAGGACAGAAAGACCGGTGTCTAA  
Consensus  
ATGCACATAGTCCAGAAAGGGTACGGGACGATAGGACTGAGCGGAGATGACCACTATTACCGCTTCCACCGAGGACAGAAAGACCGGTGTCTAA

1 10 20 30 40 50 60 70 80 90 100 110 120 130  
0hAQP23 ATGATTCTGGATTAAGTGAAGATTARGAGCTTGGCTCTGCGGGAGAGCTTCGCCGACCTTCTGGGACCTTTCTGCTTTGTGCTGTTTCGGTACCGAGATCTGGCAGCCCTGAAGTTCGACAGAGCTGGAA  
ci1000114723 ATGATTCTGGATTAAGTGAAGATTARGAGCTTGGCTCTGCGGGAGAGCTTCGCCGACCTTCTGGGACCTTTCTGCTTTGTGCTGTTTCGGTACCGAGATCTGGCAGCCCTGAAGTTCGACAGAGCTGGAA  
Consensus  
131 140 150 160 170 180 190 200 210 220 230 240 250 260  
0hAQP23 ACATTGGCTACGCCCGGTTTCTGGGGTTGGGTTTGGCTCTTGGATGGAGTGTCTGCTCTTGGTGGAGCTCAGGTGCCACCTGARCCCGCTATTACCGTGGCTTGGCAACCATCGGAARATG  
ci1000114723 ACATTGGCTACGCCCGGTTTCTGGGGTTGGGTTTGGCTCTTGGATGGAGTGTCTGCTCTTGGTGGAGCTCAGGTGCCACCTGARCCCGCTATTACCGTGGCTTGGCAACCATCGGAARATG  
Consensus  
261 270 280 290 300 310 320 330 340 350 360 370 380 390  
0hAQP23 CCAATGGAGAAAGTGCACATATACCTGGTAGCCAGTACTTAGGTGCTTCTTGGAGCTGCCGTGCTTCTTGACATACAGGGTGCCTTCGACACATATGACGGTGGTTTTCGTGCGACTACCCGT  
ci1000114723 CCAATGGAGAAAGTGCACATATACCTGGTAGCCAGTACTTAGGTGCTTCTTGGAGCTGCCGTGCTTCTTGACATACAGGGTGCCTTCGACACATATGACGGTGGTTTTCGTGCGACTACCCGT  
Consensus  
391 400 410 420 430 440 450 460 470 480 490 500 510 520  
0hAQP23 GTGACCGAGACGGCGGATGTGTTGCTTCATATCCAGAGACTTCGTTGGCACTGGAGACTGCTTTTGGACAGGCTGCTGGGACTGGCTCTTTGTGATGTGATCTGGCTATCACAGACACCA  
ci1000114723 GTGACCGAGACGGCGGATGTGTTGCTTCATATCCAGAGACTTCGTTGGCACTGGAGACTGCTTTTGGACAGGCTGCTGGGACTGGCTCTTTGTGATGTGATCTGGCTATCACAGACACCA  
Consensus  
521 530 540 550 560 570 580 590 600 610 620 630 640 650  
0hAQP23 ACATGGCAGTGCCTCAGGCTTCGACCTCTGTTGATCGGCTTTCTTGGACACGACTGCTCTGCTTCGGTACACATGTTGGTTCCTCCCTCAGCCAGCCGAGATTGGGACACATCTTTCAC  
ci1000114723 ACATGGCAGTGCCTCAGGCTTCGACCTCTGTTGATCGGCTTTCTTGGACACGACTGCTCTGCTTCGGTACACATGTTGGTTCCTCCCTCAGCCAGCCGAGATTGGGACACATCTTTCAC  
Consensus  
651 660 670 680 690 700 710 720 730 740 750 760 770 780  
0hAQP23 TGGCATGGCTGGGTGGGACAGAGGCTTTCAGCTTCCGAGACTACACTGGTTCTGGGTGCCGGTAGTGGCGCCCACTCGAGCCATCGTTGGAGCATGGCTGTACAGACTCTGGTTGGCTTCCAC  
ci1000114723 TGGCATGGCTGGGTGGGACAGAGGCTTTCAGCTTCCGAGACTACACTGGTTCTGGGTGCCGGTAGTGGCGCCCACTCGAGCCATCGTTGGAGCATGGCTGTACAGACTCTGGTTGGCTTCCAC  
Consensus  
781 790 800 810 820 830 840 849  
0hAQP23 TGGCTCAGAGACTCGTACGACATGGACAGAGAGACAGGGCCAGGATGGTGGGATTTCCTCGATGA  
ci1000114723 TGGCTCAGAGACTCGTACGACATGGACAGAGAGACAGGGCCAGGATGGTGGGATTTCCTCGATGA  
Consensus  
TGGCTCAGAGACTCGTACGACATGGACAGAGAGACAGGGCCAGGATGGTGGGATTTCCTCGATGA

|              |                                                                                                                                 |     |     |     |     |     |     |     |     |     |     |     |     |     |
|--------------|---------------------------------------------------------------------------------------------------------------------------------|-----|-----|-----|-----|-----|-----|-----|-----|-----|-----|-----|-----|-----|
|              | 1                                                                                                                               | 10  | 20  | 30  | 40  | 50  | 60  | 70  | 80  | 90  | 100 | 110 | 120 | 130 |
| 0nAQP15      | -----                                                                                                                           |     |     |     |     |     |     |     |     |     |     |     |     |     |
| ci1000148315 | ATGATTCTGGATAAGTGAAGATTAGAGCCTGGCTCTGCGGGAGACGTTCCGCCGACCTTCGCGGACCTTACGCTGCTTGTGCTGTTCCGTACCGGAGTCTGGCAGCCTGAGGTCGACAGAGCTGGAA |     |     |     |     |     |     |     |     |     |     |     |     |     |
| Consensus    | ATGATTCTGGATAAGTGAAGATTAGAGCCTGGCTCTGCGGGAGACGTTCCGCCGACCTTCGCGGACCTTACGCTGCTTGTGCTGTTCCGTACCGGAGTCTGGCAGCCTGAGGTCGACAGAGCTGGAA |     |     |     |     |     |     |     |     |     |     |     |     |     |
|              | 131                                                                                                                             | 140 | 150 | 160 | 170 | 180 | 190 | 200 | 210 | 220 | 230 | 240 | 250 | 260 |
| 0nAQP15      | -----                                                                                                                           |     |     |     |     |     |     |     |     |     |     |     |     |     |
| ci1000148315 | ACATTGGCTACGCCGCCGCTTCTGGGGTTGGGTTTGGCTCTTGGATTGGAGTGCTCTCTTGGTGGAGCGTCAGGTGCCACCTGARCCCGCTATTACCGTGCTTGGCACCATCGGAAATG         |     |     |     |     |     |     |     |     |     |     |     |     |     |
| Consensus    | ACATTGGCTACGCCGCCGCTTCTGGGGTTGGGTTTGGCTCTTGGATTGGAGTGCTCTCTTGGTGGAGCGTCAGGTGCCACCTGARCCCGCTATTACCGTGCTTGGCACCATCGGAAATG         |     |     |     |     |     |     |     |     |     |     |     |     |     |
|              | 261                                                                                                                             | 270 | 280 | 290 | 300 | 310 | 320 | 330 | 340 | 350 | 360 | 370 | 380 | 390 |
| 0nAQP15      | -----                                                                                                                           |     |     |     |     |     |     |     |     |     |     |     |     |     |
| ci1000148315 | CCAGTGGAGAAAGTGCCACATTACCTGGTAGCCCACTACTAGGTGCTTCTTGGAGCTGCCGCTCTCTTGGACATACAGGGTGGCTTCGACACATATGACGGTGGTTTGGTGGACTACCGGT       |     |     |     |     |     |     |     |     |     |     |     |     |     |
| Consensus    | CCAGTGGAGAAAGTGCCACATTACCTGGTAGCCCACTACTAGGTGCTTCTTGGAGCTGCCGCTCTCTTGGACATACAGGGTGGCTTCGACACATATGACGGTGGTTTGGTGGACTACCGGT       |     |     |     |     |     |     |     |     |     |     |     |     |     |
|              | 391                                                                                                                             | 400 | 410 | 420 | 430 | 440 | 450 | 460 | 470 | 480 | 490 | 500 | 510 | 520 |
| 0nAQP15      | -----                                                                                                                           |     |     |     |     |     |     |     |     |     |     |     |     |     |
| ci1000148315 | GTGACGGAGACGGCGGATGTGTTTCGCTTCATATCCAGAGACTTCGTTGGCACTGGGAACTGCTTTTGGACAGGTGCTCGGACTGGTCTCTTTGTGATGTGATCGTGGCTATCAGACACACCA     |     |     |     |     |     |     |     |     |     |     |     |     |     |
| Consensus    | GTGACGGAGACGGCGGATGTGTTTCGCTTCATATCCAGAGACTTCGTTGGCACTGGGAACTGCTTTTGGACAGGTGCTCGGACTGGTCTCTTTGTGATGTGATCGTGGCTATCAGACACACCA     |     |     |     |     |     |     |     |     |     |     |     |     |     |
|              | 521                                                                                                                             | 530 | 540 | 550 | 560 | 570 | 580 | 590 | 600 | 610 | 620 | 630 | 640 | 650 |
| 0nAQP15      | -----                                                                                                                           |     |     |     |     |     |     |     |     |     |     |     |     |     |
| ci1000148315 | ACATGGCAGTGCTCAGGCTCGCACCTCTGTGATCGGCTTCTTTGGCAACGACTGCTCTGCTCGGCTACACTGTGGTGTCCCTTCACCCAGCCGAGATTTGGGACCACTATCTTCAC            |     |     |     |     |     |     |     |     |     |     |     |     |     |
| Consensus    | ACATGGCAGTGCTCAGGCTCGCACCTCTGTGATCGGCTTCTTTGGCAACGACTGCTCTGCTCGGCTACACTGTGGTGTCCCTTCACCCAGCCGAGATTTGGGACCACTATCTTCAC            |     |     |     |     |     |     |     |     |     |     |     |     |     |
|              | 651                                                                                                                             | 660 | 670 | 680 | 690 | 700 | 710 | 720 | 730 | 740 | 750 | 760 | 770 | 780 |
| 0nAQP15      | -----                                                                                                                           |     |     |     |     |     |     |     |     |     |     |     |     |     |
| ci1000148315 | TGGCATGGCTGGGTGGGAAACAGAGGCTTTCAGCTTCCGAGACTACACTGGTTCTGGGTGCCGGTAGTGGCGCCCACTCGAGCCATCGTTGGAACTGGCTGTACAGACTCTGGTTGGCTCCAC     |     |     |     |     |     |     |     |     |     |     |     |     |     |
| Consensus    | TGGCATGGCTGGGTGGGAAACAGAGGCTTTCAGCTTCCGAGACTACACTGGTTCTGGGTGCCGGTAGTGGCGCCCACTCGAGCCATCGTTGGAACTGGCTGTACAGACTCTGGTTGGCTCCAC     |     |     |     |     |     |     |     |     |     |     |     |     |     |
|              | 781                                                                                                                             | 790 | 800 | 810 | 820 | 830 | 840 | 850 | 860 | 870 | 880 | 890 | 900 | 910 |
| 0nAQP15      | -----                                                                                                                           |     |     |     |     |     |     |     |     |     |     |     |     |     |
| ci1000148315 | TGGCTTCAGACTCGTACGACATGGACAGAGAGACAGGGCCAGGATGATACATGCCATCGGAGTTACGATGCTGCGCCAAAGGACACACATCAGCCTCATCTCCGACGAAACAGTCTGAGGG       |     |     |     |     |     |     |     |     |     |     |     |     |     |
| Consensus    | TGGCTTCAGACTCGTACGACATGGACAGAGAGACAGGGCCAGGATGATACATGCCATCGGAGTTACGATGCTGCGCCAAAGGACACACATCAGCCTCATCTCCGACGAAACAGTCTGAGGG       |     |     |     |     |     |     |     |     |     |     |     |     |     |
|              | 911                                                                                                                             | 915 | --- |     |     |     |     |     |     |     |     |     |     |     |
| 0nAQP15      | TCTAG                                                                                                                           |     |     |     |     |     |     |     |     |     |     |     |     |     |
| ci1000148315 | TCTAG                                                                                                                           |     |     |     |     |     |     |     |     |     |     |     |     |     |
| Consensus    | TCTAG                                                                                                                           |     |     |     |     |     |     |     |     |     |     |     |     |     |
