# Supplementary material for: First Data on Ornithodoros moubata Aquaporins: Structural, Phylogenetic and Immunogenic Characterisation as Vaccine Targets
Source: MDPI journal article supplement (doi:10.3390/pathogens11060694), 2022-06-16
Supplement: s1 [file s1]

**Figure S2.** Alignment of the amino acid sequences included in clade AQP9-like. The amino acids conserved in all the sequences are labelled with asterisks (\*); the conservative and semi-conservative substitutions are labelled with colons (:) and periods (.), respectively. The NPA motifs are highlighted in yellow, the residues within the ar/R constriction are highlighted in green, and the aspartic acid downstream the second NPA motif is highlighted in gray. The O-glycosylation sites are marked in blue. The predicted immunogenic peptides from OmAQP90, Om20812 and Om22982 are highlighted in underlined red letters, and their homologous regions in the remaining clade members are highlighted in plain red letters.

|                  |                                               |                             |                     |                          |     |
|------------------|-----------------------------------------------|-----------------------------|---------------------|--------------------------|-----|
| OmAQP90          | MKVYIRSLLLRELINEFIGTMLLILIGDSIMAIIT           | <u>AGRQEENGH</u>            | VIGPLG              | GTAFCAVF                 | 60  |
| Om20812          | --MKIQSTFVRELINEFLGTFTLIVFGDSVMAIIT           | <u>AGRQEHNAG</u>            | IIGPVG              | GTAFCAVT                 | 58  |
| Om22982          | --MKIQSTFVRELINEFLGTFTLIVFGDSVMAIIT           | <u>AGRQEHNAG</u>            | IIGPVG              | GTAFCAVT                 | 58  |
| A0A293N7C6_ORNER | --MQIRNVLARELINEFLGTMLILIGDSIVAVII            | <u>AGGQGHNAH</u>            | VIGPIG              | GTAFCAVF                 | 58  |
| XP_037563606.1   | --MKIENLLVRQLINEFLGTMLVLLGDSVLAIIT            | <u>AADNESIAA</u>            | VVGPLG              | GTAIYVAVQ                | 58  |
| XP_037563608.1   | --MKIENLLVRQLINEFLGTMLVLLGDSVLAIIT            | <u>AADNESIAA</u>            | VVGPLG              | GTAIYVAVQ                | 58  |
| XP_037563607.1   | --MKIENLLVRQLINEFLGTMLVLLGDSVLAIIT            | <u>AADNESIAA</u>            | VVGPLG              | GTAIYVAVQ                | 58  |
| XP_037563609.1   | --MKIENLLVRQLINEFLGTMLVLLGDSVLAIIT            | <u>AADNESIAA</u>            | VVGPLG              | GTAIYVAVQ                | 58  |
| XP_037510823.1   | --MKIESLLVRQLISEFLGTMLITIGDAIMAIIT            | <u>AGDNESLAA</u>            | CVGPLG              | GVAIYVAVQ                | 58  |
| XP_037510822.1   | --MKIESLLVRQLISEFLGTMLITIGDAIMAIIT            | <u>AGDNESLAA</u>            | CVGPLG              | GVAIYVAVQ                | 58  |
| XP_037292105.1   | --MKIENLLIRQLINEFLGTMLITIGDSIMAIIT            | <u>AGDNESLAA</u>            | CVGPLG              | GVAIYVAVQ                | 58  |
| XP_037292106.1   | --MKIENLLIRQLINEFLGTMLITIGDSIMAIIT            | <u>AGDNESLAA</u>            | CVGPLG              | GVAIYVAVQ                | 58  |
| AIT69684.1       | --MKIENLLIRQLINEFLGTMLITIGDSIMAIIT            | <u>AGDNESLAA</u>            | CVGPLG              | GVAIYVAVQ                | 58  |
| XP_037292107.1   | --MKIENLLIRQLINEFLGTMLITIGDSIMAIIT            | <u>AGDNESLAA</u>            | CVGPLG              | GVAIYVAVQ                | 58  |
| XP_029845132.1   | --MKIESRLIRELINEFIGTMLVLIGDSILAIIT            | <u>AGDNEPLAP</u>            | IVGPVG              | GTAFVAVT                 | 58  |
| EEC20079.1       | -----MLARDELIYTLKGLIGDSILAIIT                 | <u>AGDNEPLAP</u>            | IVGPVG              | GTAFVAVT                 | 49  |
|                  | * : : :*:*:*:*:*:*:*:*:*:*:*:*:*:*:*:*        |                             |                     |                          |     |
| OmAQP90          | VAGGVSAHINPA                                  | VTLAFASVKEFPLKKVPLFWLAQYLGA | FVGA                | VLVYVIY                  | 120 |
| Om20812          | VSGGVSAHLNPA                                  | VTLALASVKKFPIKKVPLFFVAQYTG  | AFFAA               | VVFAIY                   | 118 |
| Om22982          | VSGGVSAHLNPA                                  | VTLALASVKKFPIKKVPLFFVAQYTG  | AFFAA               | VVFAIY                   | 118 |
| A0A293N7C6_ORNER | VAGGVSAHINPA                                  | VTLALASAKEFPLKKVPLFWLAQYLGA | FVGA                | VLVYVMIY                 | 118 |
| XP_037563606.1   | IAGGVTAHLNPA                                  | VTLALASVRKFP                | IAKVPLFFAAQYLGA     | FVGAALVFVITY             | 118 |
| XP_037563608.1   | IAGGVTAHLNPA                                  | VTLALASVRKFP                | IAKVPLFFAAQYLGA     | FVGAALVFVITY             | 118 |
| XP_037563607.1   | IAGGVTAHLNPA                                  | VTLALASVRKFP                | IAKVPLFFAAQYLGA     | FVGAALVFVITY             | 118 |
| XP_037563609.1   | IAGGVTAHLNPA                                  | VTLALASVRKFP                | IAKVPLFFAAQYLGA     | FVGAALVFVITY             | 118 |
| XP_037510823.1   | IAGGVSSHLPNPA                                 | VTLAQASVRKFP                | IAKVPLYFAAQYLGGFVGA | ALVFVITY                 | 118 |
| XP_037510822.1   | IAGGVSSHLPNPA                                 | VTLAQASVRKFP                | IAKVPLYFAAQYLGGFVGA | ALVFVITY                 | 118 |
| XP_037292105.1   | IAGGVSSHLPNPA                                 | VTLAQASVRKFP                | IAKVPLYFAAQYLGGFVGA | ALVFVITY                 | 118 |
| XP_037292106.1   | IAGGVSSHLPNPA                                 | VTLAQASVRKFP                | IAKVPLYFAAQYLGGFVGA | ALVFVITY                 | 118 |
| AIT69684.1       | IAGGVSSHLPNPA                                 | VTLAQASVRKFP                | IAKVPLYFAAQYLGGFVGA | ALVFVITY                 | 118 |
| XP_037292107.1   | IAGGVSSHLPNPA                                 | VTLAQASVRKFP                | IAKVPLYFAAQYLGGFVGA | ALVFVITY                 | 118 |
| XP_029845132.1   | IAGGVSSHLPNPA                                 | VTLAQASVRKFP                | IAKVPLYFAAQYLGGFVGA | ALVFVITY                 | 118 |
| EEC20079.1       | IAGGVSSHLPNPA                                 | VTLALASTKKFP                | INKVPLYFAVQYLGA     | FVGAALVYLLY              | 109 |
|                  | : :*:*:*:*:*:*:*:*:*:*:*:*:*:*:*:*:*:*:*:*:*  |                             |                     |                          |     |
| OmAQP90          | <u>VRSVVGPTGTAS</u>                           | <u>IFSTY</u>                | PREGV               | STLT                     | 179 |
| Om20812          | <u>VRSVLGPTGT</u>                             | <u>APIFATY</u>              | PREGI               | STLT                     | 178 |
| Om22982          | <u>VRSVLGPTGT</u>                             | <u>APIFATY</u>              | PREGI               | STLT                     | 178 |
| A0A293N7C6_ORNER | <u>VRSVVGEGKTA</u>                            | <u>IFSTY</u>                | PREEV               | STLT                     | 177 |
| XP_037563606.1   | <u>VRHVMGAKATAA</u>                           | <u>IFATY</u>                | PKPHV               | STLT                     | 178 |
| XP_037563608.1   | <u>VRHVMGAKATAA</u>                           | <u>IFATY</u>                | PKPHV               | STLT                     | 178 |
| XP_037563607.1   | <u>VRHVMGAKATAA</u>                           | <u>IFATY</u>                | PKPHV               | STLT                     | 178 |
| XP_037563609.1   | <u>VRHVMGAKATAA</u>                           | <u>IFATY</u>                | PKPHV               | STLT                     | 178 |
| XP_037510823.1   | <u>VRQVTGEKSTAG</u>                           | <u>IFATY</u>                | PKPHV               | STLT                     | 178 |
| XP_037510822.1   | <u>VRQVTGEKSTAG</u>                           | <u>IFATY</u>                | PKPHV               | STLT                     | 178 |
| XP_037292105.1   | <u>IRQVTGEKATAG</u>                           | <u>IFATY</u>                | PRPHV               | STLT                     | 178 |
| XP_037292106.1   | <u>IRQVTGEKATAG</u>                           | <u>IFATY</u>                | PRPHV               | STLT                     | 178 |
| AIT69684.1       | <u>IRQVTGEKATAG</u>                           | <u>IFATY</u>                | PRPHV               | STLT                     | 178 |
| XP_037292107.1   | <u>IRQVTGEKATAG</u>                           | <u>IFATY</u>                | PRPHV               | STLT                     | 178 |
| XP_029845132.1   | <u>VRQITGKHGTAP</u>                           | <u>IFATY</u>                | PREQI               | STLT                     | 178 |
| EEC20079.1       | <u>VRQITGKHGTAP</u>                           | <u>IFATY</u>                | PREQI               | STLT                     | 169 |
|                  | : * : * .** ***:*:*:*:*:*:*:*:*:*:*:*:*:*:*:* |                             |                     |                          |     |
| OmAQP90          | LMLGMLIVAE                                    | IFAF                        | <u>SYNCAALNPAD</u>  | DIGPRVFTAVAGWGSEVFSFRNYQ | 239 |
| Om20812          | LALGLMISAE                                    | IFAF                        | <u>SYNCAALNPAD</u>  | DIGPRVFTAIAGWGMEVFSVRDYY | 238 |
| Om22982          | LALGLMISAE                                    | IFAF                        | <u>SYNCAALNPAD</u>  | DIGPRVFTAIAGWGMEVFSVRDYY | 238 |
| A0A293N7C6_ORNER | LMLGMLIVAE                                    | IFAF                        | <u>SHNCAALNPAD</u>  | DIGPRIFTAISGWSQVFTFRNYQ  | 237 |
| XP_037563606.1   | ICLALMIMSL                                    | IFSF                        | <u>PYNCAALNPAD</u>  | DISPRLFTLIAGWGPETFTLRGG  | 238 |
| XP_037563608.1   | ICLALMIMSL                                    | IFSF                        | <u>PYNCAALNPAD</u>  | DISPRLFTLIAGWGPETFTLRGG  | 238 |
| XP_037563607.1   | ICLALMIMSL                                    | IFSF                        | <u>PYNCAALNPAD</u>  | DISPRLFTLIAGWGPETFTLRGG  | 238 |
| XP_037563609.1   | ICLALMIMSL                                    | IFSF                        | <u>PYNCAALNPAD</u>  | DISPRLFTLIAGWGPETFTLRGG  | 238 |
| XP_037510823.1   | ICLGLLIMAL                                    | IFSF                        | <u>AYNCAALNPAD</u>  | DIAPRLFTLMAGWGPETFTLRGG  | 238 |

|                  |                                                              |     |
|------------------|--------------------------------------------------------------|-----|
| XP_037510822.1   | ICLGLLIMAIIFSFAYNCCPLNPADIDIPRLFTLMAGWGPETFTLRGGNYVWVPLLGPH  | 238 |
| XP_037292105.1   | ICLGLMIMAIIFSFAYNCCPLNPADIDISPRLFTLMAGWGPETFTLRGWNVWVPLLGPH  | 238 |
| XP_037292106.1   | ICLGLMIMAIIFSFAYNCCPLNPADIDISPRLFTLMAGWGPETFTLRGWNVWVPLLGPH  | 238 |
| AIT69684.1       | ICLGLMIMAIIFSFAYNCCPLNPADIDISPRLFTLMAGWGPETFTLRGWNVWVPLLGPH  | 238 |
| XP_037292107.1   | ICLGLMIMAIIFSFAYNCCPLNPADIDISPRLFTLMAGWGPETFTLRGWNVWVPLLGPH  | 238 |
| XP_029845132.1   | LALGFMIMALIFGFSYNCAPLNPADIDIGPRIFTAAGWGTEVFTYRNWNYIWVPIFGPH  | 238 |
| EEC20079.1       | LALGFMIMALIFGFSYNCAPLNPADIDIGPRIFTAAGWGTEVFTYRNWNYIWVPIFGPH  | 229 |
|                  | :*.:*: **.* :***.*****.:**:* ::* :.* :.:**:.**               |     |
| OmAQP90          | IGAIVGVWIYKLCIGDHWPIETTPALKQVLSSNDKSGPAAEPKETTNI-----        | 288 |
| Om20812          | VGGVLGAWTYKVCVEDNWPEEPTVILPVSTSKNSELGPTWL-----               | 280 |
| Om22982          | VGGVLGAWTYKVCVEDNWPEEPTVILPVSTSKNSELGTTASAEMNILFS----CDSCV-  | 293 |
| A0A293N7C6_ORNER | IGAIIGLWIYKLCIRDHWPVQEMTSLKQVVSAAANGDNPGKTVESIVLR-----PAG    | 289 |
| XP_037563606.1   | IGAILGAWLYKVAIADHWDPKPKPTVSTNGESTT-----GRSRPMDCCPM-----RKVS  | 287 |
| XP_037563608.1   | IGAILGAWLYKVAIADHWDPKPKPTVST-----                            | 266 |
| XP_037563607.1   | IGAILGAWLYKVAIADHWDPKPKPTVSKELPVPDVAVVDGKKPAAVAAPP-----PPAA  | 292 |
| XP_037563609.1   | IGAILGAWLYKVAIADHWDPKPKPTVSTEHLVASPSPG-----QL-----           | 278 |
| XP_037510823.1   | IGAILGVWLYKVAIGDHWDPDRPKPAST-N-----                          | 266 |
| XP_037510822.1   | IGAILGVWLYKVAIGDHWDPDRPKPAST-NGESTTG----RPRPTDCWPMR-----KVS  | 286 |
| XP_037292105.1   | IGAILGVWLYKVAIGDHWPEKPKPAISTNGEPTTGR---PRPA--DCWP---MRK--VS  | 287 |
| XP_037292106.1   | IGAILGVWLYKVAIGDHWPEKPKPAIST-----                            | 266 |
| AIT69684.1       | IGAILGVWLYKVAIGDHWPEKPKPAISMDHPVAVVV---AKKAPSRTPPALSPSAAPTTS | 295 |
| XP_037292107.1   | IGAILGVWLYKVAIGDHWPEKPKPAISNEHVVASP---S---PGQ---LAKEA-----   | 283 |
| XP_029845132.1   | IGAIIGAWIYKVGIGDNFPDDEPKLNGDLERGVVLEQEAAAYRPIDDKLNLEAHTNEALK | 298 |
| EEC20079.1       | IGAIIGAWIYKVGIGDNFPDDEPKLRAESGVQLVVYQPGAEQPVPEAPAPVP-----    | 282 |
|                  | :*.:*: * **.: *:.*                                           |     |
| OmAQP90          | -----                                                        | 288 |
| Om20812          | -----                                                        | 280 |
| Om22982          | -----                                                        | 293 |
| A0A293N7C6_ORNER | ENR----TEGDQTN TGKI-----                                     | 303 |
| XP_037563606.1   | TSRVVGS PDGREVKDDL VETLYKVDGERLVVELEPSQPQKL-                 | 328 |
| XP_037563608.1   | -----DGREVKDDL VETLYKVDGERLVVELEPSQPQKL-                     | 299 |
| XP_037563607.1   | AAQAQAS PQTA-----VRQTS D IEAGTPRKSP                          | 319 |
| XP_037563609.1   | AKEA-----                                                    | 282 |
| XP_037510823.1   | -----GKETKEDLVETLYKVDGDKMVLELEPAQQHQRL                       | 299 |
| XP_037510822.1   | TSRVVGS PNGKETKEDLVETLYKVDGDKMVLELEPAQQHQRL                  | 328 |
| XP_037292105.1   | TSRVVGS PDGKETKEDLVETLYKVDGDKMVLELEPTQHQR-                   | 328 |
| XP_037292106.1   | -----DGKETKEDLVETLYKVDGDKMVLELEPTQHQR-                       | 299 |
| AIT69684.1       | TSPQPAAPQATDVNAGS-----PAKA----                               | 316 |
| XP_037292107.1   | -----                                                        | 283 |
| XP_029845132.1   | L-----                                                       | 299 |
| EEC20079.1       | -----                                                        | 282 |
