# Supplementary material for: First Data on Ornithodoros moubata Aquaporins: Structural, Phylogenetic and Immunogenic Characterisation as Vaccine Targets
Source: Pathogens. 2022 Jun 16;11(6):694. doi: 10.3390/pathogens11060694 (PMC9227307; doi:10.3390/pathogens11060694)
Supplement: Supplementary file 1 [file pathogens-11-00694-s001.zip › Table S1.xlsx]

## Sheet: Supplementary table 1
Table S1. Transcripts containing full-lenght ORFs coding for aquaporin proteins recovered from the transcriptomes of midgut and salivary glands of Ornithodoros moubata.
List	Database	Transcript code	Uniprot code	GenBank code	ORF sequence	ORF length (nt)	amino acid sequence	length (aa)	MW (kDa)	Match_Sequence	species	Protein name
1	midgut transcriptome	ci|000113997	A0A1Z5L6U6	JAW02774	ATGGCAAACCCACCGTTCCCTTTCATGAAGAGATTTGTCATCAAGAGCCCAGTGTTGCGAGAGTTTCTGGCGGAGTTCTTCGGCACTTTTATCCTTTATATTTTCGGCGGTGCATCGTTCGCTCACTACATTTTCAGCGGTCAGAAAGATGTGTTGGCGGTGACCTTCTGCTGGGGCATGGGAGTCATGCTCGGCATTCAAACCGGCGCTGGAGTTTCCGGGGGTCACGTGAATCCCGTCGTAACCACTTCGTTTGCGAGCGTGGGTAGACTTCCCTGGAAGAAAGTACCCCACTATCTCTTAGGTCAACATCTGGGAGCCTTTCTGGCATCTGCTATCCTCTACTTCAATTATATCGATGCGCTGGACCATTATGATGGAGGTGAAAGACAGATATTT…	879	MANPPFPFMKRFVIKSPVLREFLAEFFGTFILYIFGGASFAHYIFSGQKDVLAVTFCWGMGVMLGIQTGAGVSGGHVNPVVTTSFASVGRLPWKKVPHYLLGQHLGAFLASAILYFNYIDALDHYDGGERQIFGDRGTGILLTTFPNEHVHLSICIFDTIICSGLLMFTIMVIIDNKNANTTSGMHAFLFGIMVMALCWAFGTNCMAAVNPARDFPPRVLASIVGYGPEVFTYRHFWWIPMFIPHVGGLIGTWLYVLAIEMHIVPERVRDDRTEREMTNLLPLPSRTEKTGV	292	32.6	CAX48963.1	Rhipicephalus sanguineus	Aquaglyceroporin
2	midgut transcriptome	ci|000124891	A0A1Z5L1C7	JAW00831	ATGGGCCGTGTTCGCCAATTCCGCTCAATATTTGGCATCGACGAGCTGTCGGCTACGAGCATGCTCTGGAAATCAATGATCGCCGAATACATCGGCACGGCCATGCTAGTTTTCATAGCATGCGGAACATGCACCAACTGGGGTCGAGGGGGAGAACCCAGCATCGCTCAGATTGCGCTCAGTTTCGCTTTCATCGTGGCAACCATGGCTCAAGCCCTGGGTCATGTCAGCGGAGCGCACATCAACCCAGCGGTGACGATGGGAATGCTGTGCGTCGGCCATATCTCCATTCTCCGAGCCTTCTTCTATATCTGCAGTCAGCTCATTGGAGGTATCACTGGAGCAGCCGTACTGAGGGCCGTGACACCAGAAGAGCGCCAGGGACTCCTGGGAGGCACG…	816	MGRVRQFRSIFGIDELSATSMLWKSMIAEYIGTAMLVFIACGTCTNWGRGGEPSIAQIALSFAFIVATMAQALGHVSGAHINPAVTMGMLCVGHISILRAFFYICSQLIGGITGAAVLRAVTPEERQGLLGGTALSEGVTPFQGVVVELVITFILVLTVFAVCDQNRLDVLGSPPLAIGLAVGAGHLMAIGYTGASMNTARTFGPAVISGAFDDHWVYWLGPIGGGILAGFVYQYVLSAPPISFEALDKAQLACLARFHNKEAVEDRTTAI	271	28.4	XP_029833586.1	Ixodes scapularis	aquaporin AQPAe.a-like
3	midgut transcriptome	ci|000114723	A0A1Z5L547	JAW02536	ATGATTCTGGATAAAGTGAAGATTAAGAGCCTGGCTCTGCGGGAGACGTTCGCCGAACTTCTGGGCACTTTCGTGCTTGTGCTGTTCGGTACCGGAGTCCTGGCAGCCCTGAAGTTCGACAGAGCTGGAAACATTGGCTACGCCGCCGGTTTCTGGGGTTGGGGTTTGGCTCTTGGAATGGGAGTGCTCGTCTCTGGTGGAGCGTCAGGTGCCCACCTGAACCCGTCTATTACCGTTGCCTTGGCAACCATCGGAAAATGCCAGTGGAGAAAAGTGCCACATTACCTGGTAGCCCAGTACTTAGGTGCCTTCCTTGGAGCTGCCGTGCTCTTCTTGACATACAAGGGTGCGTTCGACAACTATGACGGTGGTTTTCGTGCGACTACCGGTGTGAACGGA…	849	MILDKVKIKSLALRETFAELLGTFVLVLFGTGVLAALKFDRAGNIGYAAGFWGWGLALGMGVLVSGGASGAHLNPSITVALATIGKCQWRKVPHYLVAQYLGAFLGAAVLFLTYKGAFDNYDGGFRATTGVNGTADVFASYPRDFVGTGNCFLDQVVGTGLFVMCIVAITDNHNMAVPQGLQPLLIGLSLATTALCFGYNCGAPLNPARDLGPRIFTAMAGWGTEVFSFRDYNWFWVPVVAPHIGAIVGTWLYRLLVGLHWPQDSYDMEQRNRAKDGGYSLE	282	30.3	CAR66115.1	Rhipicephalus sanguineus	water-specific aquaporin
4	midgut transcriptome	ci|000148315	A0A1Z5KVQ3	JAV99057	ATGATTCTGGATAAAGTGAAGATTAAGAGCCTGGCTCTGCGGGAGACGTTCGCCGAACTTCTGGGCACTTTCGTGCTTGTGCTGTTCGGTACCGGAGTCCTGGCAGCCCTGAAGTTCGACAGAGCTGGAAACATTGGCTACGCCGCCGGTTTCTGGGGTTGGGGTTTGGCTCTTGGAATGGGAGTGCTCGTCTCTGGTGGAGCGTCAGGTGCCCACCTGAACCCGTCTATTACCGTTGCCTTGGCAACCATCGGAAAATGCCAGTGGAGAAAAGTGCCACATTACCTGGTAGCCCAGTACTTAGGTGCCTTCCTTGGAGCTGCCGTGCTCTTCTTGACATACAAGGGTGCGTTCGACAACTATGACGGTGGTTTTCGTGCGACTACCGGTGTGAACGGA…	915	MILDKVKIKSLALRETFAELLGTFVLVLFGTGVLAALKFDRAGNIGYAAGFWGWGLALGMGVLVSGGASGAHLNPSITVALATIGKCQWRKVPHYLVAQYLGAFLGAAVLFLTYKGAFDNYDGGFRATTGVNGTADVFASYPRDFVGTGNCFLDQVVGTGLFVMCIVAITDNHNMAVPQGLQPLLIGLSLATTALCFGYNCGAPLNPARDLGPRIFTAMAGWGTEVFSFRDYNWFWVPVVAPHIGAIVGTWLYRLLVGLHWPQDSYDMEQRNRAKDEYMPIGGYDAAPKEQQSASSPNEKQSKV	304	32.7	CAR66115.1	Rhipicephalus sanguineus	water-specific aquaporin
5	midgut transcriptome	ci|000144090			ATGAAGGTGTACATTCGGAGTCTGCTTCTAAGAGAACTCATCAATGAGTTCATTGGAACGATGCTGCTCATTCTAATCGGTGACTCCATCATGGCCATTATCATCGCGGGTCGTCAGGAAGAGAATGGTCATGTGATCGGTCCCCTCGGATGGGGTACAGCCATCTTCTGCGCAGTCTTCGTGGCGGGAGGAGTGTCAGCCCACATCAACCCTGCTGTGACGCTGGCCTTCGCTTCCGTCAAAGAGTTTCCTCTCAAGAAAGTGCCCTTATTTTGGCTCGCCCAGTACTTGGGTGCCTTTGTGGGTGCCGTGCTCGTCTATGTCATCTATAGAGATGCCATCAACATGTTTGACGGCGGGGTTCGTTCCGTGGTCGGACCCACTGGTACTGCTTCCATA…	867	MKVYIRSLLLRELINEFIGTMLLILIGDSIMAIIIAGRQEENGHVIGPLGWGTAIFCAVFVAGGVSAHINPAVTLAFASVKEFPLKKVPLFWLAQYLGAFVGAVLVYVIYRDAINMFDGGVRSVVGPTGTASIFSTYPREGVSTLTCFFDQVISTAVLTLTVAAIVDERNFAVPKALVPLMLGMLIVAEIFAFSYNCMAALNPARDIGPRVFTAVAGWGSEVFSFRNYQWVWVPIFGPHIGAIVGVWIYKLCIGDHWPIETTPALKQVLSSSNDKSGPAAEPKETTNI	288	31.2	XP_029845132.1	Ixodes scapularis	aquaporin-9 isoform X1
6	salivary glands transcriptome	OM_20812		MBZ3958194	ATGAAGATACAGAGCACATTCGTCAGGGAACTCATCAACGAATTTCTCGGAACATTTACGCTCATAGTATTTGGAGATTCTGTCATGGCCATAATCATTGCAGGACGGCAGGAACACAATGCAGGAATCATCGGCCCTGTAGGTTGGGGTACTGCTATCTTTTGCGCCGTCACTGTGTCTGGGGGAGTTTCAGCCCACTTAAACCCAGCAGTAACGCTAGCGTTGGCGTCCGTGAAGAAGTTTCCGATCAAGAAAGTTCCGCTCTTCTTCGTGGCGCAGTACACGGGAGCATTCTTTGCCGCTGCGGTTGTTTTTGCAATATACAGGGACGCCATTGATGCTGTGGACAGCGGGGTGCGTTCAGTACTGGGTCCAACTGGTACTGCTCCCATATTCGCC…	843	MKIQSTFVRELINEFLGTFTLIVFGDSVMAIIIAGRQEHNAGIIGPVGWGTAIFCAVTVSGGVSAHLNPAVTLALASVKKFPIKKVPLFFVAQYTGAFFAAAVVFAIYRDAIDAVDSGVRSVLGPTGTAPIFATYPREGISTLTCFIDQVVATGCLVLTAEAITDPRNFGGLPKPFYPLALGLMITAEIFAFSYNCMAPLNPARDLGPRVFTAIAGWGMEVFSVRDYVWMFVPIFAPHVGGVLGAWTYKVCVEDNWPEEEPTVILPVSTSKNSELGPTWL	280	30.1	XP_029845132.1	Ixodes scapularis	aquaporin-9 isoform X1
7	salivary glands transcriptome	OM_22982		MBZ3960076	ATGAAGATACAGAGCACATTCGTCAGGGAACTCATCAACGAATTTCTCGGAACATTTACGCTCATAGTATTTGGAGATTCTGTCATGGCCATAATCATTGCAGGACGGCAGGAACACAATGCAGGAATCATCGGCCCTGTAGGTTGGGGTACTGCTATCTTTTGCGCCGTCACTGTGTCTGGGGGAGTTTCAGCCCACTTAAACCCAGCAGTAACGCTAGCGTTGGCGTCCGTGAAGAAGTTTCCCATCAAGAAAGTTCCGCTCTTCTTCGTGGCGCAGTACACGGGAGCATTCTTTGCCGCTGCGGTTGTTTTTGCAATATACAGGGACGCCATTGATGCTGTGGACAGCGGGGTGCGTTCAGTACTGGGTCCAACTGGTACTGCTCCCATATTCGCC…	882	MKIQSTFVRELINEFLGTFTLIVFGDSVMAIIIAGRQEHNAGIIGPVGWGTAIFCAVTVSGGVSAHLNPAVTLALASVKKFPIKKVPLFFVAQYTGAFFAAAVVFAIYRDAIDAVDSGVRSVLGPTGTAPIFATYPREGISTLTCFIDQVVATGCLVLTAEAITDPRNFGGLPKPFYPLALGLMITAEIFAFSYNCMAPLNPARDLGPRVFTAIAGWGMEVFSVRDYVWMFVPIFAPHVGGVLGAWTYKVCVEDNWPEEEPTVILPVSTSKNSELGTTASAEMNILFSCDSCV	293	31.4	XP_029845132.1	Ixodes scapularis	aquaporin-9 isoform X1
8	salivary glands transcriptome	OM_7339		MBZ3946978	ATGGGCCGTGTTCGCCAATTCCGCTCAATATTTGGCATCGACGAGCTGTCGGCTACGAGCACGCTCTGGAAATCAATGATCGCCGAATACATCGGCACGGCCATGCTAGTTTTCATAGCATGCGGAACATGCACCAACTGGGGTCGAGGGGGAGAACCCAGCATCGCTCAGATTGCGCTCAGTTTCGCTTTCATCGTGGCAACCATGGCTCAAGCCCTGGGTCATGTCAGCGGAGCGCACATCAACCCAGCGGTGACGATGGGAATGCTGTGCGTCGGCCATATCTCCATTCTCCGAGCCTTCTTCTATATCTGCAGTCAGCTCATTGGAGGTATCACTGGAGCAGCCGTACTGAGGGCCGTGACACCAGAAGAGCGCCAGGGACTCCTGGGAGGCACG…	816	MGRVRQFRSIFGIDELSATSTLWKSMIAEYIGTAMLVFIACGTCTNWGRGGEPSIAQIALSFAFIVATMAQALGHVSGAHINPAVTMGMLCVGXISILRAFFYICSQLIGGITGAAVLRAVTPEERQGLLGGTALSEGVTPFQGVVVELVITFILVLTVFAVCDQNRLDVLGSPPLAIGLAVGAGHLMAIGYTGASMNTARTFGPAVISGAFDDHWVYWLGPIGGGILAGFVYQYVLSAPPISFEALDKAQLACLARFHNKEAVEDRTTAI	271	28.5	XP_029833586.1	Ixodes scapularis	aquaporin AQPAe.a-like
9	salivary glands transcriptome	OM_21129		MBZ3958447	ATGATTCTGGATAAAGTGAAGATTAAGAGCCTGGCTCTGCGGGAGACGTTCGCCGAACTTCTGGGCACTTTCGTGCTTGTGCTGTTCGGTACCGGAGTCCTGGCAGCCCTGAAGTTCGACAGAGCTGGAAACATTGGCTACGCCGCCGGTTTCTGGGGTTGGGGTTTGGCTCTTGGAATGGGAGTGCTCGTCTCTGGTGGAGCGTCAGGTGCCCACCTGAACCCGTCTATTACCGTTGCCTTGGCAACCATCGGAAAATGCCAGTGGAGAAAAGTGCCACATTACCTGGTAGCCCAGTACTTAGGTGCCTTCCTTGGAGCTGCCGTGCTCTTCTTGACATACAAGGGTGCGTTCGACAACTATGACGGTGGTTTTCGTGCGACTACCGGTGTGAACGGA…	849	MILDKVKIKSLALRETFAELLGTFVLVLFGTGVLAALKFDRAGNIGYAAGFWGWGLALGMGVLVSGGASGAHLNPSITVALATIGKCQWRKVPHYLVAQYLGAFLGAAVLFLTYKGAFDNYDGGFRATTGVNGTADVFASYPRDFVGTGNCFLDQVVGTGLFVMCIVAITDNSNMAVPQGLQPLLIGLSLGTTALCFGYNCGAPLNPARDLGPRIFTAMAGWGTEVFSFRDYNWFWVPVVAPHIGAIVGTWLYRLLVGLHWPQDSYDMEQRNRAKDGGYSLE	282	30.3	CAR66115.1	Rhipicephalus sanguineus	water-specific aquaporin
	Transcripts highlighted with the same color contain identical ORFs.
