# Supplementary material for: First Data on Ornithodoros moubata Aquaporins: Structural, Phylogenetic and Immunogenic Characterisation as Vaccine Targets
Source: Pathogens. 2022 Jun 16;11(6):694. doi: 10.3390/pathogens11060694 (PMC9227307; doi:10.3390/pathogens11060694)
Supplement: Supplementary file 1 [file pathogens-11-00694-s001.zip › Table S2.xlsx]

## Sheet: top matches NCBI+Uniprot
Supplementary Table S2. Tick orthologues of the OmAQPs retrieved by BLASTp searching of the NCBInr database restricted to ticks and the Uniprot database restricted to arthropoda.
Description	Scientific Name	Max Score	Total Score	Query Cover	E value	Per. Ident	Acc. Len	Accession	OmAQP orthologue
Aquaporin	Ornithodoros erraticus	1220	1220	0.95	1.6E-168	82.8%	303	A0A293N7C6	OmAQP90
aquaporin-9 [Ixodes scapularis]	Ixodes scapularis	367	367	0.93	1e-127	65.19%	299	XP_029845132.1	OmAQP90
aquaporin [Rhipicephalus microplus]	Rhipicephalus microplus	345	345	0.98	6e-119	56.61%	316	AIT69684.1	OmAQP90
aquaporin-9-like isoform X1 [Rhipicephalus microplus]	Rhipicephalus microplus	343	343	0.95	5e-118	59.06%	328	XP_037292105.1	OmAQP90
aquaporin-9-like isoform X3 [Rhipicephalus microplus]	Rhipicephalus microplus	342	342	0.91	7e-118	60.98%	283	XP_037292107.1	OmAQP90
aquaporin-9-like isoform X2 [Rhipicephalus microplus]	Rhipicephalus microplus	342	342	0.9	1e-117	61.22%	299	XP_037292106.1	OmAQP90
aquaporin-9-like isoform X2 [Rhipicephalus sanguineus]	Rhipicephalus sanguineus	339	339	0.93	9e-117	60.15%	299	XP_037510823.1	OmAQP90
aquaporin-9-like isoform X1 [Rhipicephalus sanguineus]	Rhipicephalus sanguineus	339	339	0.9	3e-116	62.07%	328	XP_037510822.1	OmAQP90
aquaporin, putative [Ixodes scapularis]	Ixodes scapularis	337	337	0.85	4e-116	64.92%	282	EEC20079.1	OmAQP90
aquaporin-9-like isoform X1 [Dermacentor silvarum]	Dermacentor silvarum	329	329	0.95	3e-112	58.55%	328	XP_037563606.1	OmAQP90
aquaporin-9-like isoform X2 [Dermacentor silvarum]	Dermacentor silvarum	327	327	0.92	1e-111	59.77%	319	XP_037563607.1	OmAQP90
Description	Scientific Name	Max Score	Total Score	Query Cover	E value	Per. Ident	Acc. Len	Accession	OmAQP orthologue
Aquaporin	Ornithodoros erraticus	936	936	0.95	1.6e-125	61.0%	303	A0A293N7C6	Om20812
aquaporin-9 [Ixodes scapularis]	Ixodes scapularis	380	380	0.98	5e-133	65.82%	299	XP_029845132.1	Om20813
aquaporin, putative [Ixodes scapularis]	Ixodes scapularis	347	347	0.86	4e-120	68.05%	282	EEC20079.1	Om20814
aquaporin-9-like isoform X3 [Rhipicephalus microplus]	Rhipicephalus microplus	341	341	0.92	1e-117	61.00%	283	XP_037292107.1	Om20815
aquaporin-9-like isoform X2 [Rhipicephalus microplus]	Rhipicephalus microplus	341	341	0.92	2e-117	61.00%	299	XP_037292106.1	Om20816
aquaporin [Rhipicephalus microplus]	Rhipicephalus microplus	341	341	0.92	3e-117	61.00%	316	AIT69684.1	Om20817
aquaporin-9-like isoform X4 [Dermacentor silvarum]	Dermacentor silvarum	339	339	0.93	7e-117	63.53%	282	XP_037563609.1	Om20818
aquaporin-9-like isoform X1 [Rhipicephalus microplus]	Rhipicephalus microplus	340	340	0.92	9e-117	61.00%	328	XP_037292105.1	Om20819
aquaporin-9-like isoform X3 [Dermacentor silvarum]	Dermacentor silvarum	339	339	0.93	1e-116	63.53%	299	XP_037563608.1	Om20820
aquaporin-9-like isoform X2 [Dermacentor silvarum]	Dermacentor silvarum	338	338	0.93	5e-116	63.53%	319	XP_037563607.1	Om20821
aquaporin-9-like isoform X1 [Dermacentor silvarum]	Dermacentor silvarum	338	338	0.98	5e-116	62.01%	328	XP_037563606.1	Om20822
Description	Scientific Name	Max Score	Total Score	Query Cover	E value	Per. Ident	Acc. Len	Accession	OmAQP orthologue
Aquaporin	Ornithodoros erraticus	940	940	0.95	8.3e-126	61.9%	303	A0A293N7C6	Om22982
aquaporin-9 [Ixodes scapularis]	Ixodes scapularis	384	384	0.95	4e-134	65.59%	299	XP_029845132.1	Om22983
aquaporin, putative [Ixodes scapularis]	Ixodes scapularis	350	350	0.82	4e-121	68.46%	282	EEC20079.1	Om22984
aquaporin-9-like isoform X3 [Rhipicephalus microplus]	Rhipicephalus microplus	342	342	0.88	7e-118	61.00%	283	XP_037292107.1	Om22985
aquaporin-9-like isoform X2 [Rhipicephalus microplus]	Rhipicephalus microplus	342	342	0.88	8e-118	61.00%	299	XP_037292106.1	Om22986
aquaporin [Rhipicephalus microplus]	Rhipicephalus microplus	342	342	0.88	2e-117	61.00%	316	AIT69684.1	Om22987
aquaporin-9-like isoform X1 [Dermacentor silvarum]	Dermacentor silvarum	342	342	0.96	3e-117	60.98%	328	XP_037563606.1	Om22988
aquaporin-9-like isoform X4 [Dermacentor silvarum]	Dermacentor silvarum	340	340	0.89	4e-117	63.53%	282	XP_037563609.1	Om22989
aquaporin-9-like isoform X1 [Rhipicephalus microplus]	Rhipicephalus microplus	342	342	0.88	4e-117	61.00%	328	XP_037292105.1	Om22990
aquaporin-9-like isoform X3 [Dermacentor silvarum]	Dermacentor silvarum	340	340	0.89	5e-117	63.53%	299	XP_037563608.1	Om22991
aquaporin-9-like isoform X2 [Dermacentor silvarum]	Dermacentor silvarum	340	340	0.89	2e-116	63.53%	319	XP_037563607.1	Om22992
Description	Scientific Name	Max Score	Total Score	Query Cover	E value	Per. Ident	Acc. Len	Accession	OmAQP orthologue
Aquaporin AQPAe.a	Ornithodoros erraticus	1284	1284	1	4e-179	0.908	271	A0A293MYA1	OmAQP91
aquaporin AQPAe.a [Ixodes scapularis]	Ixodes scapularis	388	388	1	1e-136	68.00%	275	XP_029833586.1	OmAQP91
aquaporin AQPAe.a-like [Dermacentor silvarum]	Dermacentor silvarum	381	381	1	7e-134	67.64%	275	XP_037582105.1	OmAQP91
aquaporin AQPAe.a-like [Rhipicephalus sanguineus]	Rhipicephalus sanguineus	381	381	1	9e-134	67.27%	275	XP_037502974.1	OmAQP91
aquaporin AQPAe.a-like [Rhipicephalus microplus]	Rhipicephalus microplus	381	381	1	1e-133	67.27%	275	XP_037283568.1	OmAQP91
Description	Scientific Name	Max Score	Total Score	Query Cover	E value	Per. Ident	Acc. Len	Accession	OmAQP orthologue
Uncharacterized protein	Ornithodoros erraticus	1477	1477	1	0.0	91.8%	292	A0A293N0E3	OmAQP97
Putative aquaporin	Ornithodoros turicata	1465	1456	0.99	0.0	91.7%	292	A0A2R5L6Q7	OmAQP97
aquaporin-7 [Ixodes scapularis]	Ixodes scapularis	476	476	0.99	6e-171	76.90%	290	XP_029845129.1	OmAQP97
aquaporin-9-like isoform X2 [Rhipicephalus microplus]	Rhipicephalus microplus	474	474	0.98	4e-170	76.82%	292	XP_037292097.1	OmAQP97
aquaporin-9-like isoform X2 [Rhipicephalus sanguineus]	Rhipicephalus sanguineus	474	474	0.98	6e-170	76.39%	292	XP_037510820.1	OmAQP97
aquaporin-9-like isoform X1 [Rhipicephalus sanguineus]	Rhipicephalus sanguineus	474	474	0.99	4e-169	76.29%	334	XP_037510819.1	OmAQP97
aquaporin-9-like isoform X1 [Rhipicephalus microplus]	Rhipicephalus microplus	473	473	0.99	8e-169	76.63%	334	XP_037292096.1	OmAQP97
aquaglyceroporin [Rhipicephalus sanguineus]	Rhipicephalus sanguineus	472	472	0.98	1e-168	76.21%	334	CAX48963.1	OmAQP97
aquaporin-9-like [Dermacentor silvarum]	Dermacentor silvarum	470	470	0.98	2e-168	75.35%	292	XP_037563616.1	OmAQP97
aquaporin-3-like [Rhipicephalus sanguineus]	Rhipicephalus sanguineus	424	424	0.88	1e-150	77.04%	260	XP_037509276.1	OmAQP97
Description	Scientific Name	Max Score	Total Score	Query Cover	E value	Per. Ident	Acc. Len	Accession	OmAQP orthologue
Putative water-specific aquaporin	Ornithodoros turicata	1343	1343	0.99	0.0	87.2%	284	A0A2R5L6A3	OmAQP23
Water specific aquaporin	Ornithodoros brasiliensis	1336	1336	0.99	0.0	87.5%	281	A0A1D2AI66	OmAQP23
Aquaglyceroporin-3	Ornithodoros erraticus	1323	1323	0.99	0.0	84.4%	285	A0A293N0K9	OmAQP23
Aquaglyceroporin-3	Ornithodoros erraticus	1294	1294	0.95	1.3e-179	84.4%	319	A0A293MWN9	OmAQP23
aquaporin-7-like isoform X3 [Rhipicephalus sanguineus]	Rhipicephalus sanguineus	411	411	0.98	3e-145	70.25%	287	XP_037510829.1	OmAQP23
aquaporin-7-like isoform X4 [Rhipicephalus sanguineus]	Rhipicephalus sanguineus	410	410	0.97	4e-145	70.40%	283	XP_037510831.1	OmAQP23
aquaporin-7-like isoform X2 [Rhipicephalus sanguineus]	Rhipicephalus sanguineus	410	410	0.97	8e-145	70.40%	291	XP_037510826.1	OmAQP23
aquaporin-7-like isoform X1 [Rhipicephalus sanguineus]	Rhipicephalus sanguineus	410	410	0.97	9e-145	70.40%	294	XP_037510825.1	OmAQP23
aquaporin-7-like isoform X3 [Dermacentor silvarum]	Dermacentor silvarum	410	410	0.98	9e-145	70.00%	287	XP_037563613.1	OmAQP23
aquaporin-7-like isoform X4 [Dermacentor silvarum]	Dermacentor silvarum	409	409	0.97	1e-144	70.40%	283	XP_037563615.1	OmAQP23
aquaporin-7-like isoform X4 [Rhipicephalus microplus]	Rhipicephalus microplus	409	409	0.97	1e-144	70.04%	283	XP_037292104.1	OmAQP23
aquaporin-7-like isoform X3 [Rhipicephalus microplus]	Rhipicephalus microplus	409	409	0.98	1e-144	69.89%	287	XP_037292102.1	OmAQP23
water-specific aquaporin [Rhipicephalus sanguineus]	Rhipicephalus sanguineus	409	409	0.97	2e-144	70.04%	291	CAR66115.1	OmAQP23
aquaporin-7-like isoform X1 [Dermacentor silvarum]	Dermacentor silvarum	409	409	0.97	3e-144	70.40%	294	XP_037563610.1	OmAQP23
Description	Scientific Name	Max Score	Total Score	Query Cover	E value	Per. Ident	Acc. Len	Accession	OmAQP orthologue
Aquaglyceroporin-3	Ornithodoros erraticus	1348	1348	0.95	0.0	80.9%	319	A0A293MWN9	OmAQP15
Putative water-specific aquaporin	Ornithodoros turicata	1319	1319	0.99	0.0	85.9%	284	A0A2R5L6A3	OmAQP15
Water specific aquaporin	Ornithodoros brasiliensis	1309	1309	0.99	0.0	85.8%	281	A0A1D2AI66	OmAQP15
Aquaglyceroporin-3	Ornithodoros erraticus	1299	1299	0.99	1.6e-180	83.1%	285	A0A293N0K9	OmAQP15
aquaporin-7-like isoform X4 [Rhipicephalus sanguineus]	Rhipicephalus sanguineus	411	411	0.9	5e-145	69.78%	283	XP_037510831.1	OmAQP15
aquaporin-7-like isoform X4 [Dermacentor silvarum]	Dermacentor silvarum	410	410	0.9	1e-144	69.78%	283	XP_037563615.1	OmAQP15
aquaporin-7-like isoform X4 [Rhipicephalus microplus]	Rhipicephalus microplus	409	409	0.9	2e-144	69.42%	283	XP_037292104.1	OmAQP15
aquaporin-7-like isoform X3 [Rhipicephalus sanguineus]	Rhipicephalus sanguineus	409	409	0.9	4e-144	69.42%	287	XP_037510829.1	OmAQP15
aquaporin-7-like isoform X2 [Rhipicephalus sanguineus]	Rhipicephalus sanguineus	409	409	0.91	7e-144	68.46%	291	XP_037510826.1	OmAQP15
aquaporin-7-like isoform X1 [Rhipicephalus sanguineus]	Rhipicephalus sanguineus	409	409	0.9	7e-144	69.68%	294	XP_037510825.1	OmAQP15
water-specific aquaporin [Rhipicephalus sanguineus]	Rhipicephalus sanguineus	408	408	0.91	1e-143	68.10%	291	CAR66115.1	OmAQP15
aquaporin-7-like isoform X3 [Rhipicephalus microplus]	Rhipicephalus microplus	407	407	0.9	1e-143	69.06%	287	XP_037292102.1	OmAQP15
aquaporin-7-like isoform X3 [Dermacentor silvarum]	Dermacentor silvarum	407	407	0.9	2e-143	69.42%	287	XP_037563613.1	OmAQP15
aquaporin-7-like isoform X1 [Dermacentor silvarum]	Dermacentor silvarum	407	407	0.9	3e-143	69.68%	294	XP_037563610.1	OmAQP15

## Sheet: Non redundant top matches
Table S2. Tick orthologues of the OmAQPs retrieved by BLASTp searching of the NCBInr database restricted to ticks and the Uniprot database restricted to arthropoda.
Description	Scientific Name	Max Score	Total Score	Query Cover	E value	Per. Ident	Acc. Len	Accession	OmAQP orthologue	Clade
Aquaporin	Ornithodoros erraticus	1220	1220	0.95	1.6E-168	82.8%	303	A0A293N7C6	OmAQP90-Om20812-Om22982	AQP9-like
aquaporin-9 [Ixodes scapularis]	Ixodes scapularis	367	367	0.93	1e-127	65.19%	299	XP_029845132.1	OmAQP90-Om20812-Om22982	AQP9-like
aquaporin [Rhipicephalus microplus]	Rhipicephalus microplus	345	345	0.98	6e-119	56.61%	316	AIT69684.1	OmAQP90-Om20812-Om22982	AQP9-like
aquaporin-9-like isoform X1 [Rhipicephalus microplus]	Rhipicephalus microplus	343	343	0.95	5e-118	59.06%	328	XP_037292105.1	OmAQP90-Om20812-Om22982	AQP9-like
aquaporin-9-like isoform X3 [Rhipicephalus microplus]	Rhipicephalus microplus	342	342	0.91	7e-118	60.98%	283	XP_037292107.1	OmAQP90-Om20812-Om22982	AQP9-like
aquaporin-9-like isoform X2 [Rhipicephalus microplus]	Rhipicephalus microplus	342	342	0.9	1e-117	61.22%	299	XP_037292106.1	OmAQP90-Om20812-Om22982	AQP9-like
aquaporin-9-like isoform X2 [Rhipicephalus sanguineus]	Rhipicephalus sanguineus	339	339	0.93	9e-117	60.15%	299	XP_037510823.1	OmAQP90-Om20812-Om22982	AQP9-like
aquaporin-9-like isoform X1 [Rhipicephalus sanguineus]	Rhipicephalus sanguineus	339	339	0.9	3e-116	62.07%	328	XP_037510822.1	OmAQP90-Om20812-Om22982	AQP9-like
aquaporin, putative [Ixodes scapularis]	Ixodes scapularis	337	337	0.85	4e-116	64.92%	282	EEC20079.1	OmAQP90-Om20812-Om22982	AQP9-like
aquaporin-9-like isoform X1 [Dermacentor silvarum]	Dermacentor silvarum	329	329	0.95	3e-112	58.55%	328	XP_037563606.1	OmAQP90-Om20812-Om22982	AQP9-like
aquaporin-9-like isoform X2 [Dermacentor silvarum]	Dermacentor silvarum	327	327	0.92	1e-111	59.77%	319	XP_037563607.1	OmAQP90-Om20812-Om22982	AQP9-like
aquaporin-9-like isoform X4 [Dermacentor silvarum]	Dermacentor silvarum	339	339	0.93	7e-117	63.53%	282	XP_037563609.1	OmAQP90-Om20812-Om22982	AQP9-like
aquaporin-9-like isoform X3 [Dermacentor silvarum]	Dermacentor silvarum	339	339	0.93	1e-116	63.53%	299	XP_037563608.1	OmAQP90-Om20812-Om22982	AQP9-like
Aquaporin AQPAe.a	Ornithodoros erraticus	1284	1284	1	4e-179	0.908	271	A0A293MYA1	OmAQP91	AQPAe.a
aquaporin AQPAe.a [Ixodes scapularis]	Ixodes scapularis	388	388	1	1e-136	68.00%	275	XP_029833586.1	OmAQP91	AQPAe.a
aquaporin AQPAe.a-like [Dermacentor silvarum]	Dermacentor silvarum	381	381	1	7e-134	67.64%	275	XP_037582105.1	OmAQP91	AQPAe.a
aquaporin AQPAe.a-like [Rhipicephalus sanguineus]	Rhipicephalus sanguineus	381	381	1	9e-134	67.27%	275	XP_037502974.1	OmAQP91	AQPAe.a
aquaporin AQPAe.a-like [Rhipicephalus microplus]	Rhipicephalus microplus	381	381	1	1e-133	67.27%	275	XP_037283568.1	OmAQP91	AQPAe.a
Uncharacterized protein	Ornithodoros erraticus	1477	1477	1	0.0	91.8%	292	A0A293N0E3	OmAQP97	AQP7/AQP9/AQP3
Putative aquaporin	Ornithodoros turicata	1465	1456	0.99	0.0	91.7%	292	A0A2R5L6Q7	OmAQP97	AQP7/AQP9/AQP4
aquaporin-7 [Ixodes scapularis]	Ixodes scapularis	476	476	0.99	6e-171	76.90%	290	XP_029845129.1	OmAQP97	AQP7/AQP9/AQP5
aquaporin-9-like isoform X2 [Rhipicephalus microplus]	Rhipicephalus microplus	474	474	0.98	4e-170	76.82%	292	XP_037292097.1	OmAQP97	AQP7/AQP9/AQP6
aquaporin-9-like isoform X2 [Rhipicephalus sanguineus]	Rhipicephalus sanguineus	474	474	0.98	6e-170	76.39%	292	XP_037510820.1	OmAQP97	AQP7/AQP9/AQP7
aquaporin-9-like isoform X1 [Rhipicephalus sanguineus]	Rhipicephalus sanguineus	474	474	0.99	4e-169	76.29%	334	XP_037510819.1	OmAQP97	AQP7/AQP9/AQP8
aquaporin-9-like isoform X1 [Rhipicephalus microplus]	Rhipicephalus microplus	473	473	0.99	8e-169	76.63%	334	XP_037292096.1	OmAQP97	AQP7/AQP9/AQP9
aquaglyceroporin [Rhipicephalus sanguineus]	Rhipicephalus sanguineus	472	472	0.98	1e-168	76.21%	334	CAX48963.1	OmAQP97	AQP7/AQP9/AQP10
aquaporin-9-like [Dermacentor silvarum]	Dermacentor silvarum	470	470	0.98	2e-168	75.35%	292	XP_037563616.1	OmAQP97	AQP7/AQP9/AQP11
aquaporin-3-like [Rhipicephalus sanguineus]	Rhipicephalus sanguineus	424	424	0.88	1e-150	77.04%	260	XP_037509276.1	OmAQP97	AQP7/AQP9/AQP12
Putative water-specific aquaporin	Ornithodoros turicata	1343	1343	0.99	0.0	87.2%	284	A0A2R5L6A3	OmAQP23-OmAQP15	AQP7-like
Water specific aquaporin	Ornithodoros brasiliensis	1336	1336	0.99	0.0	87.5%	281	A0A1D2AI66	OmAQP23-OmAQP15	AQP7-like
Aquaglyceroporin-3	Ornithodoros erraticus	1323	1323	0.99	0.0	84.4%	285	A0A293N0K9	OmAQP23-OmAQP15	AQP7-like
Aquaglyceroporin-3	Ornithodoros erraticus	1294	1294	0.95	1.3e-179	84.4%	319	A0A293MWN9	OmAQP23-OmAQP15	AQP7-like
aquaporin-7-like isoform X3 [Rhipicephalus sanguineus]	Rhipicephalus sanguineus	411	411	0.98	3e-145	70.25%	287	XP_037510829.1	OmAQP23-OmAQP15	AQP7-like
aquaporin-7-like isoform X4 [Rhipicephalus sanguineus]	Rhipicephalus sanguineus	410	410	0.97	4e-145	70.40%	283	XP_037510831.1	OmAQP23-OmAQP15	AQP7-like
aquaporin-7-like isoform X2 [Rhipicephalus sanguineus]	Rhipicephalus sanguineus	410	410	0.97	8e-145	70.40%	291	XP_037510826.1	OmAQP23-OmAQP15	AQP7-like
aquaporin-7-like isoform X1 [Rhipicephalus sanguineus]	Rhipicephalus sanguineus	410	410	0.97	9e-145	70.40%	294	XP_037510825.1	OmAQP23-OmAQP15	AQP7-like
aquaporin-7-like isoform X3 [Dermacentor silvarum]	Dermacentor silvarum	410	410	0.98	9e-145	70.00%	287	XP_037563613.1	OmAQP23-OmAQP15	AQP7-like
aquaporin-7-like isoform X4 [Dermacentor silvarum]	Dermacentor silvarum	409	409	0.97	1e-144	70.40%	283	XP_037563615.1	OmAQP23-OmAQP15	AQP7-like
aquaporin-7-like isoform X4 [Rhipicephalus microplus]	Rhipicephalus microplus	409	409	0.97	1e-144	70.04%	283	XP_037292104.1	OmAQP23-OmAQP15	AQP7-like
aquaporin-7-like isoform X3 [Rhipicephalus microplus]	Rhipicephalus microplus	409	409	0.98	1e-144	69.89%	287	XP_037292102.1	OmAQP23-OmAQP15	AQP7-like
water-specific aquaporin [Rhipicephalus sanguineus]	Rhipicephalus sanguineus	409	409	0.97	2e-144	70.04%	291	CAR66115.1	OmAQP23-OmAQP15	AQP7-like
aquaporin-7-like isoform X1 [Dermacentor silvarum]	Dermacentor silvarum	409	409	0.97	3e-144	70.40%	294	XP_037563610.1	OmAQP23-OmAQP15	AQP7-like
