# Supplementary material for: First Data on Ornithodoros moubata Aquaporins: Structural, Phylogenetic and Immunogenic Characterisation as Vaccine Targets
Source: Pathogens. 2022 Jun 16;11(6):694. doi: 10.3390/pathogens11060694 (PMC9227307; doi:10.3390/pathogens11060694)
Supplement: Supplementary file 1 [file pathogens-11-00694-s001.zip › Table S3.xlsx]

## Sheet: Summary
Table S3. 3D Homology modelling of OmAQPs using Phyre2 and SWISS-MODEL. Templates used and model quality estimation
	Phyre2					SWISS-MODEL													ProSa	PROCHECK
Sequence	Template	Description	Confidence	Coverage	Seq Identity	Template	Seq Identity	Oligo-state	QSQE	Found by	Method	Resolution	Seq Similarity	Range	Coverage	Description	GMQE	QMEAN DisCo Global	Z-score (Range 10/-20)	Ramachandran plot Allowed
OmAPQ90	6f7h	Human Aquaporin-10	1	89% (250 residues)	0.42	6f7h.1.A	42.41	homo-tetramer	0.48	HHblits	X-ray	2.30Å	0.40	7 - 257	0.89	Human Aquaporin-10	0.72	0.75 ± 0.05	-3.86	86.9%
Om20812	6f7h	Human Aquaporin-10	1	89% (250 residues)	0.4	6f7h.1.A	40.00	homo-tetramer	0.50	HHblits	X-ray	2.30Å	0.39	5 - 256	0.91	Human Aquaporin-10	0.72	0.74 ± 0.05	-3.55	87.1%
Om22982	6f7h	Human Aquaporin-10	1	85% (250 residues)	0.4	6f7h.1.A	40.00	homo-tetramer	0.48	HHblits	X-ray	2.30Å	0.39	5 - 256	0.87	Human Aquaporin-10	0.70	0.74 ± 0.05	-3.47	87.1%
OmAQP23	6f7h	Human Aquaporin-10	1	89% (251 residues)	0.45	6f7h.1.A	43.85	homo-tetramer	0.53	HHblits	X-ray	2.30Å	0.42	10 - 261	0.92	Human Aquaporin-10	0.76	0.77 ± 0.05	-4.97	88.8%
OmAQP15	6f7h	Human Aquaporin-10	1	83% (251 residues)	0.45	6f7h.1.A	43.85	homo-tetramer	0.50	HHblits	X-ray	2.30Å	0.42	10 - 261	0.86	Human Aquaporin-10	0.70	0.77 ± 0.05	-4.75	88.8%
OmAQP97	6f7h	Human Aquaporin-10	1	85% (248 residues)	0.35	6f7h.1.A	35.22	homo-tetramer	0.45	HHblits	X-ray	2.30Å	0.39	16 - 263	0.90	Human Aquaporin-10	0.69	0.75 ± 0.05	-3.65	87.9%
OmAQP91	2d57	Rattus norvergicus Aquaporin-4	1	82% (221 residues)	0.5	5c5x.1.A	46.46	homo-tetramer	0.72	HHblits	X-ray	2.60Å	0.43	18 - 244	0.83	Human Aquaporin-5	0.69	0.75 ± 0.05	-2.25	75.9%

## Sheet: OmAQP90
ProSA					PROCHECK

## Sheet: Om20812
ProSA					PROCHECK

## Sheet: Om22982
ProSA					PROCHECK

## Sheet: OmAQP23
ProSA					PROCHECK

## Sheet: OmAQP15
ProSA					PROCHECK

## Sheet: OmAQP97
ProSA					PROCHECK

## Sheet: OmAQP91
ProSA					PROCHECK
