# Supplementary material for: First Data on Ornithodoros moubata Aquaporins: Structural, Phylogenetic and Immunogenic Characterisation as Vaccine Targets
Source: Pathogens. 2022 Jun 16;11(6):694. doi: 10.3390/pathogens11060694 (PMC9227307; doi:10.3390/pathogens11060694)
Supplement: Supplementary file 1 [file pathogens-11-00694-s001.zip › Table S4.xlsx]

## Sheet: Summary
Table S4: Structural, physicochemical and epitope predictions for OmAQP90
Position	O-glycosilation	Sequence	TMHMM	Emini (accesibility)	BepiPred 2.0 (surface)	Chou & Fasman (turns)	Karplus & Scoultz (flexibility)	Parker (hydrophilicity)	Kolaskar & Tongaonkar	BepiPred 2.0	BepiPred 1.0	ABCpred	BcePred	Ellipro	MHC I IEDB Pig	MHC II IEDB Human	MHC II IEDB Mouse	NetChop	PCPS	CEG
1		M	i		E					.	.	.	.	.	.	T	.		S
2		K	i		E					.	.	.	.	.	T	T	.
3		V	i	E	E					.	.	.	.	.	T	T	.	S
4		Y	i	E	E	.	.	.	.	.	.	.	.	.	T	T	.	S
5		I	i	.	E	.	.	.	B	.	.	.	B	.	T	T	.		S
6		R	i	.	E	.	.	.	B	.	.	.	B	.	T	T	.		S
7		S	i	.	E	.	F	.	B	.	.	.	B	B	T	T	.
8		L	i	E	E	.	F	.	B	.	.	.	B	B	T	T	.	S	S
9		L	i	.	.	.	F	.	.	.	.	.	B	B	T	T	.		S
10		L	i	.	.	.	F	.	B	.	.	.	B	B	T	T	.	S	S
11		R	i	.	.	.	F	.	B	.	.	.	B	B	T	T	.
12		E	i	.	.	.	F	.	.	.	.	.	.	B	T	T	.
13		L	M	E	.	.	F	.	.	.	.	.	B	B	T	T	.	S	S
14		I	M	.	.	.	F	.	.	.	.	.	B	B	T	T	.		S
15		N	M	.	.	.	.	.	.	.	.	.	.	B	T	T	.
16		E	M	.	.	.	.	.	.	.	.	.	.	.	T	T	.
17		F	M	.	.	.	.	.	.	.	.	.	.	.	T	T	.	S	S
18		I	M	.	.	.	.	.	.	.	.	.	.	.	T	T	.		S
19		G	M	.	.	.	.	.	.	.	.	.	.	.	T	T	.
20		T	M	.	.	.	.	.	.	.	.	.	.	.	T	T	.
21		M	M	.	.	.	.	.	.	.	.	.	.	.	T	T	.	S	S
22		L	M	.	E	.	.	.	B	.	.	.	.	.	T	T	.	S	S
23		L	M	.	.	.	.	.	B	.	.	.	B	.	.	T	.	S	S
24		I	M	.	.	.	.	.	B	.	.	.	B	.	.	T	.
25		L	M	.	.	.	.	.	B	.	.	.	B	.	.	T	.		S
26		I	M	.	.	.	.	.	B	.	.	.	.	.	.	T	.		S
27		G	M	.	.	.	F	.	B	.	.	.	.	.	.	T	.
28		D	M	.	.	.	F	.	.	.	.	.	.	.	.	T	.
29		S	M	.	.	.	.	.	.	.	.	.	.	.	.	T	.
30		I	M	.	.	.	.	.	.	.	.	.	.	.	.	T	.		S
31		M	M	.	.	.	.	.	.	.	.	B	.	.	.	T	.		S
32		A	M	.	.	.	.	.	B	.	.	B	.	.	.	T	.
33		I	M	.	.	.	.	.	.	.	.	B	.	B	.	T	.	S
34		I	M	.	.	.	.	.	.	.	.	B	.	B	.	T	.
35		I	M	.	E	.	.	.	.	.	.	B	.	.	.	T	.	S	S
36		A	o	.	E	.	.	.	.	B	.	B	.	B	.	.	.
37		G	o	E	E	.	F	.	.	B	.	B	B	B	.	.	.
38		R	o	E	E	.	.	H	.	B	B	B	B	B	T	.	.	S
39		Q	o	E	E	F	.	.	.	B	B	B	B	B	T	.	.
40		E	o	E	E	F	.	H	.	B	B	B	B	B	T	.	.
41		E	o	E	E	F	.	.	.	B	B	B	B	B	T	.	.
42		N	o	E	.	F	.	H	.	B	B	B	B	B	T	.	.
43		G	o	.	.	.	.	H	.	B	B	B	B	B	T	.	.
44		H	o	.	.	F	F	H	.	.	B	B	.	.	T	.	.
45		V	M	.	.	.	F	H	.	.	B	B	.	B	T	.	.	S
46		I	M	.	.	F	F	.	.	.	B	B	B	B	T	.	.	S	S
47		G	M	.	.	F	F	.	.	.	.	B	B	.	T	.	.
48		P	M	.	.	F	F	.	.	.	.	B	.	.	T	.	.
49		L	M	.	E	F	F	.	.	.	.	B	.	.	T	.	.		S
50		G	M	.	.	F	F	.	.	.	.	B	.	.	T	.	.
51		W	M	.	.	F	F	.	.	.	.	B	.	.	T	.	.	S	S
52		G	M	.	.	.	F	.	.	.	.	B	.	.	T	.	.
53		T	M	.	E	.	F	.	.	.	.	B	.	.	T	.	.
54		A	M	.	.	.	.	.	.	.	.	B	.	.	T	.	.
55		I	M	.	.	.	.	.	B	.	.	B	.	.	T	.	.	S
56		F	M	.	.	.	.	.	B	.	.	B	.	.	.	.	.	S	S
57		C	M	.	.	.	.	.	.	.	.	B	.	.	.	.	T
58		A	M	.	.	.	.	.	B	.	.	B	.	.	.	.	T
59		V	M	.	.	.	.	.	B	.	.	.	.	.	.	.	T
60		F	M	.	.	.	.	.	B	.	.	.	.	B	T	.	T	S	S
61		V	M	.	.	.	.	.	B	.	.	.	.	.	T	.	T		S
62		A	M	.	.	.	.	.	.	.	.	B	.	.	T	.	T
63		G	M	.	.	.	F	.	B	.	.	B	.	B	T	.	T
64		G	M	.	E	.	F	.	B	.	.	B	.	.	T	.	T
65		V	M	.	.	F	F	H	.	.	.	B	.	.	T	.	T		S
66		S	M	.	.	F	.	H	B	.	B	B	.	.	T	.	T
67		A	M	.	E	F	.	H	.	.	B	B	.	.	T	.	T
68		H	i	E	.	F	.	H	B	.	B	B	.	.	T	.	T
69		I	i	.	.	F	.	H	.	.	.	B	.	.	T	.	T	S	S
70		N	i	.	.	.	.	.	B	.	.	B	.	.	T	.	T
71		P	i	.	.	.	F	.	B	.	.	B	.	.	T	.	T
72		A	i	.	.	.	F	.	B	.	.	B	.	.	T	.	T
73		V	i	.	.	.	.	.	B	.	.	B	.	.	T	.	T		S
74		T	i	.	.	.	.	.	B	.	.	B	.	.	T	.	T
75		L	i	.	.	.	.	.	B	.	.	B	.	.	T	.	T	S	S
76		A	i	.	.	.	.	.	.	.	.	B	.	.	T	.	T	S
77		F	i	.	.	.	.	.	.	.	.	B	.	.	T	.	T	S	S
78		A	i	.	.	.	.	.	B	.	.	.	.	B	T	.	T
79		S	i	E	.	.	.	H	.	.	.	.	.	B	T	.	T
80		V	i	E	.	.	F	.	.	.	.	.	.	B	T	.	T	S	S
81		K	i	E	E	.	F	H	.	.	.	.	.	B	T	.	T	S
82		E	i	E	E	.	F	.	B	B	.	.	.	B	T	.	T
83		F	i	.	.	.	F	.	B	B	.	.	.	B	T	.	T	S	S
84		P	i	.	E	.	F	H	.	B	.	.	B	B	T	.	T
85		L	i	.	.	.	F	.	B	B	.	.	.	B	T	.	T	S	S
86		K	i	E	E	.	F	.	B	B	.	.	B	B	T	.	T	S
87		K	i	E	.	.	.	.	B	.	.	.	B	B	T	.	T	S
88		V	M	.	.	.	F	.	B	.	.	.	B	B	T	.	T
89		P	M	.	.	.	.	.	B	.	.	.	.	B	T	.	T
90		L	M	.	.	.	.	.	B	.	.	.	B	B	T	.	T	S	S
91		F	M	.	.	.	.	.	B	.	.	.	.	.	T	.	T	S
92		W	M	.	.	.	.	.	.	.	.	.	.	.	T	.	T	S	S
93		L	M	.	.	.	.	.	B	.	.	.	.	B	T	.	T	S	S
94		A	M	.	.	.	.	.	B	.	.	.	.	.	T	.	T
95		Q	M	.	.	.	.	.	B	.	.	.	.	.	T	.	T
96		Y	M	.	.	.	.	.	B	.	.	.	.	.	T	.	T	S	S
97		L	M	.	.	.	.	.	B	.	.	.	.	.	.	.	T	S	S
98		G	M	.	.	.	.	.	.	.	.	.	.	.	.	.	T
99		A	M	.	.	.	.	.	.	.	.	.	.	.	T	.	T
100		F	M	.	.	.	.	.	B	.	.	.	.	.	T	.	T		S
101		V	M	.	.	.	.	.	B	.	.	.	.	.	T	.	T		S
102		G	M	.	.	.	.	.	B	.	.	.	.	.	T	.	T
103		A	M	.	.	.	.	.	B	.	.	.	.	.	T	.	T
104		V	M	.	.	.	.	.	B	.	.	.	.	B	T	.	T		S
105		L	M	.	.	.	.	.	B	.	.	.	.	B	T	.	T		S
106		V	M	.	.	.	.	.	B	.	.	.	B	.	T	T	T	S
107		Y	M	.	.	.	.	.	B	.	.	.	B	B	T	T	T	S	S
108		V	M	.	.	.	.	.	B	.	.	B	B	B	.	T	T
109		I	M	E	.	.	.	.	.	.	.	B	B	B	.	T	T
110		Y	M	E	.	.	.	.	B	.	.	B	.	.	.	T	T	S	S
111		R	o	.	E	.	F	.	B	.	.	B	.	B	.	T	T
112		D	o	.	E	.	F	.	.	.	.	B	.	B	.	T	T
113		A	o	E	E	.	.	H	.	B	.	B	.	B	.	T	T
114		I	o	.	.	.	.	.	.	B	.	B	.	B	.	T	T		S
115		N	o	.	E	.	.	.	.	B	.	B	.	B	.	T	T
116		M	o	.	E	.	.	.	.	B	.	B	.	B	T	T	T		S
117		F	o	.	.	F	F	.	.	B	.	B	.	B	T	T	.	S	S
118		D	o	.	E	.	.	H	.	B	.	B	B	B	T	T	T
119		G	o	.	E	F	F	H	.	B	.	B	.	B	T	T	T
120		G	o	E	E	F	.	H	.	B	.	B	.	B	T	T	T
121		V	o	.	.	F	.	H	.	B	.	B	.	B	T	.	T		S
122		R	o	.	E	.	.	H	B	B	B	B	B	B	T	.	T		S
123		S	o	.	E	.	F	H	B	B	B	B	B	B	T	.	T
124		V	o	.	.	.	F	H	B	B	B	.	B	.	T	.	T	S
125		V	o	.	E	.	F	H	B	B	B	.	.	B	T	.	T	S	S
126		G	o	.	E	F	.	H	B	B	B	.	.	B	T	.	T
127		P	o	.	E	.	.	H	.	B	B	.	.	B	T	.	T
128	O-gly	T	o	E	E	F	.	H	.	B	B	.	.	B	T	.	T
129		G	o	E	.	F	.	H	.	B	B	B	B	.	T	.	T
130		T	o	.	E	.	.	H	.	B	B	B	.	.	T	.	T
131		A	o	.	.	.	.	H	.	.	B	B	.	.	T	.	T	S
132	O-gly	S	o	.	.	F	F	H	.	.	B	B	.	.	T	.	T
133		I	o	.	.	.	.	H	.	.	B	B	.	.	T	.	.	S
134		F	o	.	.	.	.	.	.	.	.	B	.	.	T	.	.	S	S
135		S	o	E	.	F	F	.	.	.	.	B	.	.	T	.	.
136		T	o	E	.	.	F	.	.	.	B	B	.	.	T	.	.
137		Y	o	E	.	F	.	.	.	.	B	B	B	.	T	.	.	S
138		P	o	E	.	F	.	H	.	.	B	B	B	.	T	.	.
139		R	o	E	.	F	.	H	.	B	B	B	B	B	T	.	.	S
140		E	o	E	E	.	.	H	.	B	B	B	B	B	T	.	.
141		G	o	E	E	F	.	H	.	B	B	B	.	B	T	.	.
142		V	M	.	.	.	.	H	.	B	B	B	.	B	T	.	.		S
143		S	M	.	.	.	.	.	.	B	.	B	.	B	T	.	.
144		T	M	.	.	F	F	H	B	B	.	B	B	B	T	.	.
145		L	M	.	.	.	F	.	B	.	.	B	B	B	T	.	.	S	S
146		T	M	.	.	.	.	.	B	.	.	B	B	B	T	.	.	S
147		C	M	.	.	.	.	.	B	.	.	B	.	.	T	.	.		S
148		F	M	.	.	.	.	.	B	.	.	B	B	B	T	.	T		S
149		F	M	.	.	.	.	.	.	.	.	B	B	B	T	.	T		S
150		D	M	.	.	.	F	.	B	.	.	B	B	.	.	.	T
151		Q	M	.	.	.	F	.	B	.	.	B	B	.	.	.	T
152		V	M	E	.	.	F	.	B	.	.	B	.	.	T	.	T	S
153		I	M	.	.	.	F	H	.	.	.	B	.	.	T	.	T		S
154		S	M	.	.	.	F	.	B	.	.	B	.	.	T	.	T
155		T	M	.	.	.	F	.	B	.	.	B	.	.	T	.	T
156		A	M	.	.	.	F	.	B	.	.	.	.	.	T	.	T	S
157		V	M	.	.	.	.	.	B	.	.	.	.	.	T	.	T		S
158		L	M	.	.	.	.	.	B	.	.	.	.	.	T	.	T	S	S
159		T	M	.	.	.	.	.	B	.	.	B	.	.	T	.	T
160		L	M	.	.	.	.	.	B	.	.	B	.	.	T	.	T	S	S
161		T	M	.	.	.	.	.	B	.	.	B	.	.	T	.	T
162		V	M	.	.	.	.	.	B	.	.	B	.	.	T	.	T	S	S
163		A	M	.	.	.	.	.	B	.	.	B	.	.	.	.	T
164		A	M	.	.	.	.	.	B	.	.	B	.	B	.	.	.
165		I	i	.	.	.	.	.	B	.	.	B	.	.	T	.	.	S
166		V	i	E	.	.	.	H	.	.	.	B	.	.	T	.	T	S	S
167		D	i	E	.	.	.	H	.	.	.	B	.	B	T	.	T
168		E	i	E	E	.	.	H	.	B	.	B	.	B	T	.	T
169		R	i	.	E	.	.	.	.	B	.	B	.	B	T	.	T
170		N	i	E	E	.	F	.	.	B	.	B	.	B	T	.	T
171		F	M	E	E	.	.	H	.	B	B	B	.	B	T	.	T		S
172		A	M	E	E	.	.	H	.	B	.	B	.	B	T	.	T
173		V	M	.	E	.	F	.	.	B	.	B	.	B	T	.	T	S
174		P	M	.	E	.	F	.	B	B	.	B	.	B	T	.	T
175		K	M	.	E	.	F	.	B	B	.	.	.	B	T	.	T	S
176		A	M	.	.	.	F	.	B	B	.	.	.	B	T	.	T	S
177		L	M	.	.	.	.	.	B	B	.	.	.	B	T	.	T		S
178		V	M	.	.	.	.	.	.	.	.	.	.	B	T	.	T
179		P	M	.	.	.	.	.	B	.	.	.	.	.	T	.	T
180		L	M	.	.	.	.	.	B	.	.	.	B	B	T	.	T	S	S
181		M	M	.	.	.	.	.	B	.	.	.	.	B	T	.	.		S
182		L	M	.	.	.	.	.	.	.	.	.	.	.	T	.	.		S
183		G	M	.	.	.	.	.	B	.	.	.	.	.	T	.	.
184		M	M	.	E	.	.	.	.	.	.	.	.	B	T	.	.		S
185		L	M	.	E	.	.	.	B	.	.	.	.	.	.	.	.		S
186		I	M	.	E	.	.	.	.	.	.	.	.	.	.	.	.
187		V	M	.	E	.	.	.	B	.	.	.	.	.	T	.	.		S
188		A	M	.	.	.	.	.	B	.	.	.	.	.	T	.	.
189		E	M	.	.	.	.	.	B	.	.	.	.	.	T	.	.
190		I	M	.	.	.	.	.	B	.	.	.	.	.	T	.	.
191		F	M	.	.	.	.	.	.	.	.	.	.	B	T	.	T	S	S
192		A	M	.	.	.	.	.	.	.	.	.	.	B	T	.	T
193		F	M	.	.	.	.	.	.	.	.	.	.	.	T	.	T		S
194		S	o	.	.	F	.	.	B	.	.	.	.	.	T	.	T
195		Y	o	.	.	F	.	.	.	.	.	.	.	B	T	.	T	S	S
196		N	o	.	.	F	.	.	.	.	.	.	.	B	.	.	T
197		C	o	.	.	F	.	H	.	.	.	.	.	.	.	.	T
198		M	o	.	.	.	.	.	B	.	.	.	.	.	.	.	T		S
199		A	o	.	.	.	.	.	.	.	.	.	.	.	.	.	T	S
200		A	o	.	.	.	.	.	B	.	.	.	.	.	.	.	T
201		L	o	.	.	.	.	.	.	.	.	.	.	.	.	.	T	S	S
202		N	o	E	.	.	F	H	.	.	.	.	.	.	.	.	T
203		P	o	E	.	F	.	H	.	.	B	B	.	.	.	.	T
204		A	o	E	.	.	.	H	.	.	B	B	.	.	T	.	T
205		R	o	.	.	F	.	.	.	.	B	B	.	.	T	.	T
206		D	o	.	.	F	.	.	.	.	B	B	.	.	T	.	.
207		I	o	E	.	F	F	.	.	.	B	B	.	.	T	.	.		S
208		G	o	.	.	F	.	H	.	.	B	B	.	.	T	.	.
209		P	o	.	.	F	.	.	.	.	B	B	.	.	T	.	.
210		R	o	E	.	.	F	.	.	.	.	B	.	.	T	.	.
211		V	o	E	.	.	.	.	.	.	.	B	.	.	T	.	.	S
212		F	o	.	.	.	.	.	.	.	.	B	.	.	T	.	.	S	S
213		T	o	.	.	.	.	.	.	.	.	B	.	.	T	.	.
214		A	o	.	.	.	.	.	.	.	.	B	.	B	T	.	.	S
215		V	o	.	.	.	.	.	.	.	.	B	.	B	T	.	.	S	S
216		A	o	.	.	.	.	H	.	.	.	B	.	B	T	.	.	S
217		G	o	.	E	F	.	.	.	.	B	B	.	B	T	.	.
218		W	o	.	.	F	F	H	.	B	B	B	.	.	T	.	.	S	S
219		G	o	.	.	F	.	H	.	B	.	B	.	B	T	.	.
220		S	o	.	E	.	.	.	.	B	.	B	.	B	T	.	.
221		E	o	.	E	F	.	.	.	B	.	B	.	B	T	.	.
222		V	o	.	E	.	F	.	.	B	.	B	.	.	T	.	.	S
223		F	o	.	.	.	.	.	.	B	.	B	.	B	T	.	.	S	S
224		S	o	.	E	.	.	.	.	B	.	B	.	B	T	.	.
225		F	o	E	E	.	.	.	.	B	.	B	.	B	T	.	.		S
226		R	o	E	E	F	.	.	.	B	.	B	B	B	T	T	T
227		N	o	.	E	F	.	.	.	B	.	B	B	B	T	T	T
228		Y	o	E	.	.	.	.	.	B	.	B	.	B	T	T	T	S	S
229		Q	o	E	E	F	.	.	.	B	.	B	.	B	T	T	T
230		W	M	.	.	.	.	.	B	.	.	B	.	.	T	T	T	S	S
231		V	M	.	.	.	.	.	B	.	.	B	B	.	T	T	T
232		W	M	.	.	.	.	.	B	.	.	.	B	B	T	T	T	S	S
233		V	M	.	.	.	.	.	B	.	.	.	B	.	.	T	T
234		P	M	.	.	.	.	.	.	.	.	.	B	.	.	T	T
235		I	M	.	.	F	.	.	B	.	.	.	.	.	.	T	T	S
236		F	M	.	.	F	.	.	B	.	.	.	B	B	.	T	T	S	S
237		G	M	.	.	F	F	.	B	.	.	.	.	.	.	T	T
238		P	M	.	.	F	F	.	.	.	.	.	.	.	.	T	T
239		H	M	.	.	F	F	.	.	.	.	.	.	.	.	T	T
240		I	M	.	.	F	.	.	.	.	.	.	.	.	.	T	T		S
241		G	M	.	.	.	.	.	B	.	.	.	.	.	T	.	T
242		A	M	.	.	.	.	.	B	.	.	.	.	.	T	.	T
243		I	M	.	.	.	.	.	B	.	.	.	.	B	T	.	T
244		V	M	.	.	.	.	.	B	.	.	.	.	B	T	.	T		S
245		G	M	.	.	.	.	.	B	.	.	.	.	.	T	.	T
246		V	M	.	.	.	.	.	B	.	.	.	B	.	T	.	.
247		W	M	.	E	.	.	.	B	.	.	.	B	B	T	.	.		S
248		I	M	.	.	.	.	.	B	.	.	.	B	B	T	.	.
249		Y	M	.	.	.	.	.	B	.	.	.	B	B	T	.	.	S	S
250		K	i	.	E	.	.	.	B	.	.	.	B	B	.	.	.	S
251		L	i	.	.	.	.	.	B	.	.	.	B	B	.	.	.	S	S
252		C	i	.	.	.	.	.	B	.	.	.	B	B	.	.	.
253		I	i	.	.	F	F	.	B	.	.	.	.	B	.	.	.	S	S
254		G	i	.	.	F	F	.	B	B	.	.	.	B	.	.	.
255		D	i	.	E	F	F	.	.	B	.	.	.	B	.	.	.
256		H	i	.	E	F	F	.	.	B	.	B	.	B	.	.	.
257		W	i	E	E	F	F	H	.	B	B	B	.	B	T	.	.		S
258		P	i	E	E	F	F	H	.	B	B	B	.	.	T	.	.
259		I	i	E	E	.	F	.	.	B	B	B	.	.	T	.	.	S
260		E	i	E	E	F	.	.	.	B	B	B	.	.	T	.	.
261		T	i	E	E	.	.	H	.	B	B	B	.	.	T	.	.
262		T	i	E	E	.	.	.	.	B	B	B	.	.	T	.	.
263		P	i	E	E	.	.	.	.	B	B	B	B	.	T	.	.	S
264		A	i	E	E	.	.	H	.	B	B	B	B	.	T	.	.
265		L	i	E	E	.	F	H	B	B	.	B	.	.	T	.	.	S	S
266		K	i	.	E	.	.	.	B	B	.	B	.	.	T	.	.	S	S
267		Q	i	.	E	.	F	.	B	B	.	B	.	.	T	.	.
268		V	i	E	E	.	.	.	B	B	.	B	B	.	T	.	.	S	S
269		L	i	.	E	F	.	H	B	B	.	B	B	.	T	.	.	S	S
270		S	i	.	E	F	.	.	B	B	B	B	B	.	.	.	.	S
271		S	i	.	E	.	F	H	.	B	B	B	B	.	.	.	.
272		S	i	.	E	F	.	H	.	B	B	.	B	.	.	.	.
273		N	i	.	E	F	.	H	.	B	B	.	B	.	.	.	.
274		D	i	E	E	F	.	H	.	B	B	.	B	.	.	.	.
275		K	i	E	E	F	.	H	.	B	B	.	B	.	.	.	.	S	S
276		S	i	E	E	F	.	H	.	B	B	.	B	.	.	.	.
277		G	i	E	E	F	.	H	.	B	B	.	B	.	.	.	.
278		P	i	.	E	F	F	H	.	B	B	.	B	.	.	.	.
279		A	i	E	E	F	.	H	.	B	B	.	.	.	.	.	.	S
280		A	i	E	E	F	.	H	.	B	B	.	.	.	T	.	.
281		E	i	E	E	.	.	H	.	B	B	.	B	.	T	.	.
282		P	i	E	E	.	.	H	.	B	B	.	B	.	T	.	.
283		K	i	E	E	.	.	H	.	B	B	.	B	.	T	.	.	S
284		E	i	E	E	.	.	H	.	B	B	.	B	.	T	.	.
285		T	i	E	E	F		H	.	B	B	.	B	.	T	.	.
286		T	i		E					.	B	.	.	.	T	.	.
287		N	i		E					.	B	.	.	.	T	.	.
288		I	i		E					.	B	.	.	.	T	.	.	S

## Sheet: Figure OmAQP90
		Position	1									10										20										30										40
Structure and exposure	Structure and exposure	Sequence	M	K	V	Y	I	R	S	L	L	L	R	E	L	I	N	E	F	I	G	T	M	L	L	I	L	I	G	D	S	I	M	A	I	I	I	A	G	R	Q	E	E	N	G	H	V	I	G
		TMHMM	i	i	i	i	i	i	i	i	i	i	i	i	M	M	M	M	M	M	M	M	M	M	M	M	M	M	M	M	M	M	M	M	M	M	M	o	o	o	o	o	o	o	o	o	M	M	M
		Emini (accesibility)			E	E	.	.	.	E	.	.	.	.	E	.	.	.	.	.	.	.	.	.	.	.	.	.	.	.	.	.	.	.	.	.	.	.	E	E	E	E	E	E	.	.	.	.	.
		BepiPred 2.0 (surface)	E	E	E	E	E	E	E	E	.	.	.	.	.	.	.	.	.	.	.	.	.	E	.	.	.	.	.	.	.	.	.	.	.	.	E	E	E	E	E	E	E	.	.	.	.	.	.
		Chou & Fasman (turns)				.	.	.	.	.	.	.	.	.	.	.	.	.	.	.	.	.	.	.	.	.	.	.	.	.	.	.	.	.	.	.	.	.	.	.	F	F	F	F	.	F	.	F	F
		Karplus & Schultz (flexibility)				.	.	.	F	F	F	F	F	F	F	F	.	.	.	.	.	.	.	.	.	.	.	.	F	F	.	.	.	.	.	.	.	.	F	.	.	.	.	.	.	F	F	F	F
		Parker (hydrophilicity)				.	.	.	.	.	.	.	.	.	.	.	.	.	.	.	.	.	.	.	.	.	.	.	.	.	.	.	.	.	.	.	.	.	.	H	.	H	.	H	H	H	H	.	.
B cell epitopes	Linear and discontinuous B cell epitopes	Kolaskar & Tongaonkar				.	B	B	B	B	.	B	B	.	.	.	.	.	.	.	.	.	.	B	B	B	B	B	B	.	.	.	.	B	.	.	.	.	.	.	.	.	.	.	.	.	.	.	.
		BepiPred 2.0	.	.	.	.	.	.	.	.	.	.	.	.	.	.	.	.	.	.	.	.	.	.	.	.	.	.	.	.	.	.	.	.	.	.	.	B	B	B	B	B	B	B	B	.	.	.	.
		BepiPred 1.0	.	.	.	.	.	.	.	.	.	.	.	.	.	.	.	.	.	.	.	.	.	.	.	.	.	.	.	.	.	.	.	.	.	.	.	.	.	B	B	B	B	B	B	B	B	B	.
		ABCpred	.	.	.	.	.	.	.	.	.	.	.	.	.	.	.	.	.	.	.	.	.	.	.	.	.	.	.	.	.	.	B	B	B	B	B	B	B	B	B	B	B	B	B	B	B	B	B
		BcePred	.	.	.	.	B	B	B	B	B	B	B	.	B	B	.	.	.	.	.	.	.	.	B	B	B	.	.	.	.	.	.	.	.	.	.	.	B	B	B	B	B	B	B	.	.	B	B
		ElliPro (discontinuous)	.	.	.	.	.	.	B	B	B	B	B	B	B	B	B	.	.	.	.	.	.	.	.	.	.	.	.	.	.	.	.	.	B	B	.	B	B	B	B	B	B	B	B	.	B	B	.
T cell epitopes	T cell epitopes	MHC I IEDB Pig	.	T	T	T	T	T	T	T	T	T	T	T	T	T	T	T	T	T	T	T	T	T	.	.	.	.	.	.	.	.	.	.	.	.	.	.	.	T	T	T	T	T	T	T	T	T	T
		MHC II IEDB Human	T	T	T	T	T	T	T	T	T	T	T	T	T	T	T	T	T	T	T	T	T	T	T	T	T	T	T	T	T	T	T	T	T	T	T	.	.	.	.	.	.	.	.	.	.	.	.
		MHC II IEDB Mouse	.	.	.	.	.	.	.	.	.	.	.	.	.	.	.	.	.	.	.	.	.	.	.	.	.	.	.	.	.	.	.	.	.	.	.	.	.	.	.	.	.	.	.	.	.	.	.
Proteasomal processing	Proteasomal processing	NetChop			S	S				S		S			S				S				S	S	S										S		S			S							S	S
		PCPS	S				S	S		S	S	S			S	S			S	S			S	S	S		S	S				S	S				S											S
		Antigenic peptides																																				OmAQP90_A
									Key OmAQP90:
									o (outside), extracellular; M, transmembrane; i, intracellular
									E, exposed on surface
									F, predicted turns and flexibility
									H, hydrophilic
									B, B-cell epitope
									T, T-cell epitope
									S, predicted proteasome cut site
[truncated: 241 more columns]

## Sheet: TMHMM
TMHMM result
# OmAQP90 Length: 288
# OmAQP90 Number of predicted TMHs: 6
# OmAQP90 Exp number of AAs in TMHs: 132.54503
# OmAQP90 Exp number, first 60 AAs: 38.14864
# OmAQP90 Total prob of N-in: 0.99121
# OmAQP90 POSSIBLE N-term signal sequence
OmAQP90	TMHMM2.0	inside	1 12
OmAQP90	TMHMM2.0	TMhelix	13 35
OmAQP90	TMHMM2.0	outside	36 44
OmAQP90	TMHMM2.0	TMhelix	45 67
OmAQP90	TMHMM2.0	inside	68 87
OmAQP90	TMHMM2.0	TMhelix	88 110
OmAQP90	TMHMM2.0	outside	111 141
OmAQP90	TMHMM2.0	TMhelix	142 164
OmAQP90	TMHMM2.0	inside	165 170
OmAQP90	TMHMM2.0	TMhelix	171 193
OmAQP90	TMHMM2.0	outside	194 229
OmAQP90	TMHMM2.0	TMhelix	230 249
OmAQP90	TMHMM2.0	inside	250 288

## Sheet: Emini (accesibility)
Position	Residue	Start	End	Peptide	Score
3	V	1	6	MKVYIR	1186
4	Y	2	7	KVYIRS	1606
5	I	3	8	VYIRSL	0.662
6	R	4	9	YIRSLL	0.736
7	S	5	10	IRSLLL	0.387
8	L	6	11	RSLLLR	1082
9	L	7	12	SLLLRE	0.957
10	L	8	13	LLLREL	0.589
11	R	9	14	LLRELI	0.5
12	E	10	15	LRELIN	0.976
13	L	11	16	RELINE	2049
14	I	12	17	ELINEF	0.906
15	N	13	18	LINEFI	0.367
16	E	14	19	INEFIG	0.44
17	F	15	20	NEFIGT	0.906
18	I	16	21	EFIGTM	0.558
19	G	17	22	FIGTML	0.265
20	T	18	23	IGTMLL	0.253
21	M	19	24	GTMLLI	0.253
22	L	20	25	TMLLIL	0.211
23	L	21	26	MLLILI	0.102
24	I	22	27	LLILIG	0.102
25	L	23	28	LILIGD	0.207
26	I	24	29	ILIGDS	0.337
27	G	25	30	LIGDSI	0.337
28	D	26	31	IGDSIM	0.404
29	S	27	32	GDSIMA	0.582			Predicted peptides:
30	I	28	33	DSIMAI	0.413			No.	Start	End	Peptide	Length
31	M	29	34	SIMAII	0.173			1	37	42	GRQEEN	6
32	A	30	35	IMAIII	0.091			2	79	88	SVKEFPLKKV	10
33	I	31	36	MAIIIA	0.131			3	135	141	STYPREG	7
34	I	32	37	AIIIAG	0.131			4	166	172	VDERNFA	7
35	I	33	38	IIIAGR	0.253			5	202	207	NPARDI	6
36	A	34	39	IIAGRQ	0.625			6	257	265	WPIETTPAL	9
37	G	35	40	IAGRQE	1545
38	R	36	41	AGRQEE	3817
39	Q	37	42	GRQEEN	6076
40	E	38	43	RQEENG	6076
41	E	39	44	QEENGH	4221
42	N	40	45	EENGHV	1809
43	G	41	46	ENGHVI	0.732
44	H	42	47	NGHVIG	0.418
45	V	43	48	GHVIGP	0.402
46	I	44	49	HVIGPL	0.335
47	G	45	50	VIGPLG	0.244
48	P	46	51	IGPLGW	0.345
49	L	47	52	GPLGWG	0.488
50	G	48	53	PLGWGT	0.711
51	W	49	54	LGWGTA	0.465
52	G	50	55	GWGTAI	0.395
53	T	51	56	WGTAIF	0.346
54	A	52	57	GTAIFC	0.176
55	I	53	58	TAIFCA	0.18
56	F	54	59	AIFCAV	0.092
57	C	55	60	IFCAVF	0.079
58	A	56	61	FCAVFV	0.084
59	V	57	62	CAVFVA	0.098
60	F	58	63	AVFVAG	0.181
61	V	59	64	VFVAGG	0.177
62	A	60	65	FVAGGV	0.177
63	G	61	66	VAGGVS	0.274
64	G	62	67	AGGVSA	0.373
65	V	63	68	GGVSAH	0.502
66	S	64	69	GVSAHI	0.356
67	A	65	70	VSAHIN	0.578
68	H	66	71	SAHINP	1205
69	I	67	72	AHINPA	0.908
70	N	68	73	HINPAV	0.667
71	P	69	74	INPAVT	0.708
72	A	70	75	NPAVTL	0.833
73	V	71	76	PAVTLA	0.523
74	T	72	77	AVTLAF	0.293
75	L	73	78	VTLAFA	0.293
76	A	74	79	TLAFAS	0.529
77	F	75	80	LAFASV	0.272
78	A	76	81	AFASVK	0.66
79	S	77	82	FASVKE	1131
80	V	78	83	ASVKEF	1131
81	K	79	84	SVKEFP	1731
82	E	80	85	VKEFPL	1065
83	F	81	86	KEFPLK	2.87
84	P	82	87	EFPLKK	2.87
85	L	83	88	FPLKKV	1.23
86	K	84	89	PLKKVP	2196
87	K	85	90	LKKVPL	1171
88	V	86	91	KKVPLF	1.23
89	P	87	92	KVPLFW	0.647
90	L	88	93	VPLFWL	0.267
91	F	89	94	PLFWLA	0.363
92	W	90	95	LFWLAQ	0.407
93	L	91	96	FWLAQY	0.772
94	A	92	97	WLAQYL	0.736
95	Q	93	98	LAQYLG	0.692
96	Y	94	99	AQYLGA	0.848
97	L	95	100	QYLGAF	0.727
98	G	96	101	YLGAFV	0.312
99	A	97	102	LGAFVG	0.197
100	F	98	103	GAFVGA	0.241
101	V	99	104	AFVGAV	0.181
102	G	100	105	FVGAVL	0.148
103	A	101	106	VGAVLV	0.127
104	V	102	107	GAVLVY	0.267
105	L	103	108	AVLVYV	0.2
106	V	104	109	VLVYVI	0.139
107	Y	105	110	LVYVIY	0.293
108	V	106	111	VYVIYR	0.697
109	I	107	112	YVIYRD	1568
110	Y	108	113	VIYRDA	1011
111	R	109	114	IYRDAI	0.955
112	D	110	115	YRDAIN	2.19
113	A	111	116	RDAINM	1383
114	I	112	117	DAINMF	0.612
115	N	113	118	AINMFD	0.612
116	M	114	119	INMFDG	0.599
117	F	115	120	NMFDGG	0.846
118	D	116	121	MFDGGV	0.39
119	G	117	122	FDGGVR	0.773
120	G	118	123	DGGVRS	1196
121	V	119	124	GGVRSV	0.531
122	R	120	125	GVRSVV	0.399
123	S	121	126	VRSVVG	0.399
124	V	122	127	RSVVGP	0.83
125	V	123	128	SVVGPT	0.612
126	G	124	129	VVGPTG	0.452
127	P	125	130	VGPTGT	0.878
128	T	126	131	GPTGTA	1196
129	G	127	132	PTGTAS	1619
130	T	128	133	TGTASI	0.734
131	A	129	134	GTASIF	0.44
132	S	130	135	TASIFS	0.596
133	I	131	136	ASIFST	0.596
134	F	132	137	SIFSTY	0.925
135	S	133	138	IFSTYP	1067
136	T	134	139	FSTYPR	2982
137	Y	135	140	STYPRE	5965
138	P	136	141	TYPREG	4405
139	R	137	142	YPREGV	2265
140	E	138	143	PREGVS	1937
141	G	139	144	REGVST	1808
142	V	140	145	EGVSTL	0.761
143	S	141	146	GVSTLT	0.634
144	T	142	147	VSTLTC	0.344
145	L	143	148	STLTCF	0.401
146	T	144	149	TLTCFF	0.259
147	C	145	150	LTCFFD	0.3
148	F	146	151	TCFFDQ	0.63
149	F	147	152	CFFDQV	0.324
150	D	148	153	FFDQVI	0.423
151	Q	149	154	FDQVIS	0.655
152	V	150	155	DQVIST	1092
153	I	151	156	QVISTA	0.661
154	S	152	157	VISTAV	0.283
155	T	153	158	ISTAVL	0.315
156	A	154	159	STAVLT	0.648
157	V	155	160	TAVLTL	0.399
158	L	156	161	AVLTLT	0.399
159	T	157	162	VLTLTV	0.293
160	L	158	163	LTLTVA	0.399
161	T	159	164	TLTVAA	0.488
162	V	160	165	LTVAAI	0.237
163	A	161	166	TVAAIV	0.213
164	A	162	167	VAAIVD	0.247
165	I	163	168	AAIVDE	0.576
166	V	164	169	AIVDER	1117
167	D	165	170	IVDERN	1779
168	E	166	171	VDERNF	2197
169	R	167	172	DERNFA	2.99
170	N	168	173	ERNFAV	1329
171	F	169	174	RNFAVP	1187
172	A	170	175	NFAVPK	1212
173	V	171	176	FAVPKA	0.761
174	P	172	177	AVPKAL	0.725
175	K	173	178	VPKALV	0.533
176	A	174	179	PKALVP	1.11
177	L	175	180	KALVPL	0.592
178	V	176	181	ALVPLM	0.293
179	P	177	182	LVPLML	0.239
180	L	178	183	VPLMLG	0.287
181	M	179	184	PLMLGM	0.382
182	L	180	185	LMLGML	0.204
183	G	181	186	MLGMLI	0.173
184	M	182	187	LGMLIV	0.13
185	L	183	188	GMLIVA	0.159
186	I	184	189	MLIVAE	0.279
187	V	185	190	LIVAEI	0.197
188	A	186	191	IVAEIF	0.207
189	E	187	192	VAEIFA	0.299
190	I	188	193	AEIFAF	0.349
191	F	189	194	EIFAFS	0.462
192	A	190	195	IFAFSY	0.418
193	F	191	196	FAFSYN	0.96
194	S	192	197	AFSYNC	0.594
195	Y	193	198	FSYNCM	0.582
196	N	194	199	SYNCMA	0.679
197	C	195	200	YNCMAA	0.512
198	M	196	201	NCMAAL	0.269
199	A	197	202	CMAALN	0.269
200	A	198	203	MAALNP	0.777
201	L	199	204	AALNPA	0.793
202	N	200	205	ALNPAR	1538
203	P	201	206	LNPARD	2543
204	A	202	207	NPARDI	2161
205	R	203	208	PARDIG	1.33
206	D	204	209	ARDIGP	1.33
207	I	205	210	RDIGPR	2579
208	G	206	211	DIGPRV	0.977
209	P	207	212	IGPRVF	0.507
210	R	208	213	GPRVFT	1043
211	V	209	214	PRVFTA	1065
212	F	210	215	RVFTAV	0.511
213	T	211	216	VFTAVA	0.264
214	A	212	217	FTAVAG	0.352
215	V	213	218	TAVAGW	0.427
216	A	214	219	AVAGWG	0.293
217	G	215	220	VAGWGS	0.388
218	W	216	221	AGWGSE	0.906
219	G	217	222	GWGSEV	0.666
220	S	218	223	WGSEVF	0.582
221	E	219	224	GSEVFS	0.742
222	V	220	225	SEVFSF	0.65
223	F	221	226	EVFSFR	0.949
224	S	222	227	VFSFRN	0.882
225	F	223	228	FSFRNY	1861
226	R	224	229	SFRNYQ	3722
227	N	225	230	FRNYQW	2.92
228	Y	226	231	RNYQWV	2503
229	Q	227	232	NYQWVW	1344
230	W	228	233	YQWVWV	0.62
231	V	229	234	QWVWVP	0.612
232	W	230	235	WVWVPI	0.248
233	V	231	236	VWVPIF	0.204
234	P	232	237	WVPIFG	0.272
235	I	233	238	VPIFGP	0.4
236	F	234	239	PIFGPH	0.733
237	G	235	240	IFGPHI	0.332
238	P	236	241	FGPHIG	0.469
239	H	237	242	GPHIGA	0.548
240	I	238	243	PHIGAI	0.388
241	G	239	244	HIGAIV	0.186
242	A	240	245	IGAIVG	0.135
243	I	241	246	GAIVGV	0.143
244	V	242	247	AIVGVW	0.152
245	G	243	248	IVGVWI	0.106
246	V	244	249	VGVWIY	0.236
247	W	245	250	GVWIYK	0.637
248	I	246	251	VWIYKL	0.531
249	Y	247	252	WIYKLC	0.383
250	K	248	253	IYKLCI	0.255
251	L	249	254	YKLCIG	0.361
252	C	250	255	KLCIGD	0.384
253	I	251	256	LCIGDH	0.262
254	G	252	257	CIGDHW	0.333
255	D	253	258	IGDHWP	0.962
256	H	254	259	GDHWPI	0.962
257	W	255	260	DHWPIE	1683
258	P	256	261	HWPIET	1455
259	I	257	262	WPIETT	1543
260	E	258	263	PIETTP	2269
261	T	259	264	IETTPA	1482
262	T	260	265	ETTPAL	1744
263	P	261	266	TTPALK	2014
264	A	262	267	TPALKQ	2416
265	L	263	268	PALKQV	1243
266	K	264	269	ALKQVL	0.663
267	Q	265	270	LKQVLS	0.879
268	V	266	271	KQVLSS	1429
269	L	267	272	QVLSSS	0.957
270	S	268	273	VLSSSN	0.889
271	S	269	274	LSSSND	2.0
272	S	270	275	SSSNDK	4.85
273	N	271	276	SSNDKS	4.85
274	D	272	277	SNDKSG	3582
275	K	273	278	NDKSGP	4133
276	S	274	279	DKSGPA	2596
277	G	275	280	KSGPAA	1571
278	P	276	281	SGPAAE	1.36
279	A	277	282	GPAAEP	1569
280	A	278	283	PAAEPK	3171
281	E	279	284	AAEPKE	3552
282	P	280	285	AEPKET	5074
283	K	281	286	EPKETT	7249
284	E	282	287	PKETTN	6731
285	T	283	288	KETTNI	3052

## Sheet: BepiPred 2.0 Surf
Position	AminoAcid	Exposed/Buried	Relative Surface Accessilibity	Helix Probability	Sheet Probability	Coil Probability	Epitope Probability	Assignment
1	M	E	0.677	0.016	0.005	0.979	0.263444444444	.
2	K	E	0.564	0.502	0.102	0.396	0.325333333333	.
3	V	E	0.532	0.502	0.102	0.396	0.385666666667	.
4	Y	E	0.492	0.660	0.049	0.291	0.442222222222	.
5	I	E	0.271	0.561	0.047	0.393	0.488	.
6	R	E	0.405	0.257	0.016	0.727	0.483444444444	.
7	S	E	0.405	0.622	0.015	0.363	0.472666666667	.
8	L	E	0.474	0.782	0.003	0.216	0.458777777778	.
9	L	B	0.099	0.923	0.002	0.076	0.430444444444	.
10	L	B	0.057	0.970	0.001	0.030	0.420555555556	.
11	R	B	0.204	0.988	0.000	0.012	0.398777777778	.
12	E	B	0.241	0.988	0.000	0.012	0.376777777778	.
13	L	B	0.054	0.988	0.000	0.012	0.354	.
14	I	B	0.105	0.988	0.000	0.012	0.348	.
15	N	B	0.078	0.988	0.000	0.012	0.338222222222	.
16	E	B	0.106	0.988	0.000	0.012	0.318777777778	.
17	F	B	0.124	0.988	0.000	0.012	0.306777777778	.
18	I	B	0.203	0.988	0.000	0.012	0.303222222222	.
19	G	B	0.112	0.988	0.000	0.012	0.287888888889	.
20	T	B	0.138	0.988	0.000	0.012	0.273	.
21	M	B	0.166	0.988	0.000	0.012	0.263666666667	.
22	L	E	0.259	0.988	0.000	0.012	0.260888888889	.
23	L	B	0.138	0.988	0.000	0.012	0.248777777778	.
24	I	B	0.119	0.988	0.000	0.012	0.253555555556	.
25	L	B	0.179	0.970	0.001	0.030	0.269777777778	.
26	I	B	0.188	0.970	0.001	0.030	0.272888888889	.
27	G	B	0.107	0.970	0.001	0.030	0.281888888889	.
28	D	B	0.119	0.923	0.002	0.076	0.277333333333	.
29	S	B	0.084	0.923	0.002	0.076	0.287777777778	.
30	I	B	0.057	0.923	0.002	0.076	0.299111111111	.
31	M	B	0.061	0.879	0.010	0.111	0.326	.
32	A	B	0.055	0.802	0.014	0.185	0.360666666667	.
33	I	B	0.133	0.751	0.050	0.199	0.394222222222	.
34	I	B	0.146	0.561	0.047	0.393	0.422222222222	.
35	I	E	0.284	0.268	0.043	0.689	0.467666666667	.
36	A	E	0.338	0.113	0.043	0.844	0.505777777778	E
37	G	E	0.403	0.058	0.017	0.925	0.552333333333	E
38	R	E	0.631	0.018	0.019	0.964	0.576222222222	E
39	Q	E	0.551	0.018	0.019	0.964	0.599222222222	E
40	E	E	0.527	0.058	0.017	0.925	0.601666666667	E
41	E	E	0.443	0.053	0.005	0.942	0.587333333333	E
42	N	B	0.233	0.176	0.004	0.820	0.566111111111	E
43	G	B	0.254	0.321	0.003	0.675	0.531444444444	E
44	H	B	0.18	0.782	0.003	0.216	0.494111111111	.
45	V	B	0.169	0.802	0.014	0.185	0.462666666667	.
46	I	B	0.144	0.938	0.007	0.055	0.438222222222	.
47	G	B	0.143	0.938	0.007	0.055	0.420777777778	.
48	P	B	0.127	0.970	0.001	0.030	0.402333333333	.
49	L	E	0.28	0.970	0.001	0.030	0.384444444444	.
50	G	B	0.198	0.970	0.001	0.030	0.378444444444	.
51	W	B	0.246	0.970	0.001	0.030	0.377666666667	.
52	G	B	0.227	0.970	0.001	0.030	0.375444444444	.
53	T	E	0.329	0.970	0.001	0.030	0.359	.
54	A	B	0.187	0.970	0.001	0.030	0.341333333333	.
55	I	B	0.169	0.975	0.003	0.022	0.325444444444	.
56	F	B	0.164	0.975	0.003	0.022	0.320333333333	.
57	C	B	0.223	0.938	0.007	0.055	0.312777777778	.
58	A	B	0.121	0.938	0.007	0.055	0.304777777778	.
59	V	B	0.112	0.911	0.033	0.057	0.323777777778	.
60	F	B	0.2	0.831	0.044	0.125	0.340333333333	.
61	V	B	0.181	0.751	0.050	0.199	0.360777777778	.
62	A	B	0.087	0.522	0.016	0.462	0.396222222222	.
63	G	B	0.228	0.176	0.004	0.820	0.432222222222	.
64	G	E	0.352	0.176	0.004	0.820	0.460777777778	.
65	V	B	0.198	0.109	0.005	0.886	0.467555555556	.
66	S	B	0.155	0.053	0.005	0.942	0.475888888889	.
67	A	E	0.291	0.016	0.005	0.979	0.483444444444	.
68	H	B	0.241	0.018	0.019	0.964	0.453666666667	.
69	I	B	0.098	0.058	0.017	0.925	0.420222222222	.
70	N	B	0.12	0.109	0.005	0.886	0.387777777778	.
71	P	B	0.075	0.600	0.003	0.397	0.353888888889	.
72	A	B	0.03	0.879	0.010	0.111	0.310444444444	.
73	V	B	0.041	0.831	0.044	0.125	0.286666666667	.
74	T	B	0.04	0.831	0.044	0.125	0.275333333333	.
75	L	B	0.032	0.975	0.003	0.022	0.266777777778	.
76	A	B	0.043	0.970	0.001	0.030	0.276888888889	.
77	F	B	0.09	0.988	0.000	0.012	0.319	.
78	A	B	0.078	0.970	0.001	0.030	0.362444444444	.
79	S	B	0.082	0.923	0.002	0.076	0.397888888889	.
80	V	B	0.244	0.858	0.002	0.139	0.439222222222	.
81	K	E	0.46	0.321	0.003	0.675	0.475111111111	.
82	E	E	0.528	0.109	0.005	0.886	0.501111111111	E
83	F	B	0.11	0.053	0.005	0.942	0.526888888889	E
84	P	E	0.523	0.053	0.005	0.942	0.532888888889	E
85	L	B	0.244	0.176	0.004	0.820	0.532333333333	E
86	K	E	0.377	0.176	0.004	0.820	0.504333333333	E
87	K	B	0.283	0.257	0.016	0.727	0.473333333333	.
88	V	B	0.047	0.561	0.047	0.393	0.446444444444	.
89	P	B	0.105	0.779	0.100	0.120	0.404333333333	.
90	L	B	0.146	0.779	0.100	0.120	0.378	.
91	F	B	0.111	0.831	0.044	0.125	0.354444444444	.
92	W	B	0.11	0.938	0.007	0.055	0.338888888889	.
93	L	B	0.182	0.975	0.003	0.022	0.331111111111	.
94	A	B	0.094	0.970	0.001	0.030	0.310333333333	.
95	Q	B	0.135	0.970	0.001	0.030	0.297333333333	.
96	Y	B	0.19	0.970	0.001	0.030	0.291111111111	.
97	L	B	0.196	0.970	0.001	0.030	0.287444444444	.
98	G	B	0.112	0.970	0.001	0.030	0.286777777778	.
99	A	B	0.101	0.988	0.000	0.012	0.286444444444	.
100	F	B	0.164	0.988	0.000	0.012	0.277444444444	.
101	V	B	0.146	0.988	0.000	0.012	0.267666666667	.
102	G	B	0.052	0.988	0.000	0.012	0.260111111111	.
103	A	B	0.069	0.970	0.001	0.030	0.262222222222	.
104	V	B	0.136	0.970	0.001	0.030	0.275222222222	.
105	L	B	0.097	0.970	0.001	0.030	0.286333333333	.
106	V	B	0.038	0.938	0.007	0.055	0.310888888889	.
107	Y	B	0.158	0.938	0.007	0.055	0.343666666667	.
108	V	B	0.162	0.879	0.010	0.111	0.378444444444	.
109	I	B	0.124	0.717	0.014	0.269	0.407666666667	.
110	Y	B	0.129	0.406	0.004	0.590	0.428111111111	.
111	R	E	0.301	0.321	0.003	0.675	0.463	.
112	D	E	0.496	0.406	0.004	0.590	0.492	.
113	A	E	0.312	0.600	0.003	0.397	0.504111111111	E
114	I	B	0.096	0.622	0.015	0.363	0.541777777778	E
115	N	E	0.446	0.622	0.015	0.363	0.563888888889	E
116	M	E	0.501	0.622	0.015	0.363	0.580777777778	E
117	F	B	0.225	0.522	0.016	0.462	0.591444444444	E
118	D	E	0.401	0.257	0.016	0.727	0.619111111111	E
119	G	E	0.443	0.113	0.043	0.844	0.631555555556	E
120	G	E	0.418	0.113	0.087	0.800	0.636333333333	E
121	V	B	0.307	0.118	0.150	0.732	0.655222222222	E
122	R	E	0.339	0.064	0.216	0.721	0.670444444444	E
123	S	E	0.336	0.064	0.216	0.721	0.661444444444	E
124	V	B	0.313	0.125	0.227	0.648	0.656333333333	E
125	V	E	0.35	0.118	0.150	0.732	0.644222222222	E
126	G	E	0.373	0.113	0.043	0.844	0.627444444444	E
127	P	E	0.474	0.113	0.043	0.844	0.591888888889	E
128	T	E	0.519	0.113	0.043	0.844	0.579111111111	E
129	G	B	0.237	0.113	0.043	0.844	0.555222222222	E
130	T	E	0.291	0.056	0.142	0.802	0.512666666667	E
131	A	B	0.207	0.064	0.216	0.721	0.472555555556	.
132	S	B	0.127	0.020	0.205	0.775	0.437555555556	.
133	I	B	0.082	0.021	0.451	0.528	0.419555555556	.
134	F	B	0.068	0.022	0.552	0.426	0.410666666667	.
135	S	B	0.048	0.022	0.552	0.426	0.415888888889	.
136	T	B	0.075	0.021	0.451	0.528	0.446777777778	.
137	Y	B	0.147	0.021	0.279	0.699	0.462222222222	.
138	P	B	0.199	0.018	0.088	0.893	0.475888888889	.
139	R	B	0.24	0.053	0.043	0.903	0.504111111111	E
140	E	E	0.378	0.058	0.017	0.925	0.528	E
141	G	E	0.493	0.115	0.016	0.868	0.539666666667	E
142	V	B	0.153	0.181	0.016	0.803	0.532777777778	E
143	S	B	0.211	0.181	0.016	0.803	0.529777777778	E
144	T	B	0.253	0.782	0.003	0.216	0.517222222222	E
145	L	B	0.244	0.858	0.002	0.139	0.469888888889	.
146	T	B	0.282	0.858	0.002	0.139	0.448111111111	.
147	C	B	0.19	0.923	0.002	0.076	0.440666666667	.
148	F	B	0.151	0.970	0.001	0.030	0.418444444444	.
149	F	B	0.199	0.970	0.001	0.030	0.408333333333	.
150	D	B	0.233	0.970	0.001	0.030	0.395555555556	.
151	Q	B	0.187	0.970	0.001	0.030	0.379444444444	.
152	V	B	0.172	0.975	0.003	0.022	0.357111111111	.
153	I	B	0.248	0.970	0.001	0.030	0.339111111111	.
154	S	B	0.171	0.970	0.001	0.030	0.334	.
155	T	B	0.151	0.970	0.001	0.030	0.321111111111	.
156	A	B	0.179	0.970	0.001	0.030	0.302222222222	.
157	V	B	0.21	0.970	0.001	0.030	0.284333333333	.
158	L	B	0.133	0.970	0.001	0.030	0.263555555556	.
159	T	B	0.137	0.975	0.003	0.022	0.256444444444	.
160	L	B	0.232	0.938	0.007	0.055	0.265444444444	.
161	T	B	0.118	0.911	0.033	0.057	0.267	.
162	V	B	0.089	0.831	0.044	0.125	0.273777777778	.
163	A	B	0.093	0.779	0.100	0.120	0.294333333333	.
164	A	B	0.103	0.725	0.163	0.112	0.328888888889	.
165	I	B	0.045	0.649	0.163	0.188	0.371	.
166	V	B	0.08	0.453	0.248	0.299	0.423777777778	.
167	D	B	0.209	0.191	0.086	0.723	0.474666666667	.
168	E	E	0.49	0.115	0.016	0.868	0.516	E
169	R	E	0.558	0.115	0.016	0.868	0.543111111111	E
170	N	E	0.459	0.115	0.016	0.868	0.576333333333	E
171	F	E	0.554	0.058	0.017	0.925	0.603888888889	E
172	A	E	0.512	0.058	0.017	0.925	0.616333333333	E
173	V	E	0.356	0.058	0.017	0.925	0.600111111111	E
174	P	E	0.365	0.058	0.017	0.925	0.581666666667	E
175	K	E	0.552	0.109	0.005	0.886	0.549444444444	E
176	A	B	0.284	0.246	0.004	0.750	0.507222222222	E
177	L	B	0.189	0.502	0.002	0.495	0.469666666667	.
178	V	B	0.271	0.694	0.003	0.303	0.431333333333	.
179	P	B	0.202	0.858	0.002	0.139	0.404555555556	.
180	L	B	0.259	0.938	0.007	0.055	0.371666666667	.
181	M	B	0.256	0.975	0.003	0.022	0.351222222222	.
182	L	B	0.216	0.970	0.001	0.030	0.334222222222	.
183	G	B	0.259	0.988	0.000	0.012	0.313777777778	.
184	M	E	0.34	0.988	0.000	0.012	0.292444444444	.
185	L	E	0.222	0.988	0.000	0.012	0.297555555556	.
186	I	E	0.235	0.975	0.003	0.022	0.301111111111	.
187	V	E	0.226	0.975	0.003	0.022	0.318111111111	.
188	A	B	0.254	0.970	0.001	0.030	0.320333333333	.
189	E	B	0.257	0.970	0.001	0.030	0.328666666667	.
190	I	B	0.21	0.970	0.001	0.030	0.326555555556	.
191	F	B	0.202	0.970	0.001	0.030	0.337222222222	.
192	A	B	0.172	0.923	0.002	0.076	0.355888888889	.
193	F	B	0.111	0.858	0.002	0.139	0.371111111111	.
194	S	B	0.089	0.858	0.002	0.139	0.380222222222	.
195	Y	B	0.256	0.782	0.003	0.216	0.387	.
196	N	B	0.247	0.600	0.003	0.397	0.383555555556	.
197	C	B	0.086	0.321	0.003	0.675	0.388	.
198	M	B	0.132	0.176	0.004	0.820	0.398888888889	.
199	A	B	0.094	0.115	0.016	0.868	0.402	.
200	A	B	0.055	0.113	0.043	0.844	0.385	.
201	L	B	0.028	0.113	0.087	0.800	0.375444444444	.
202	N	B	0.073	0.268	0.043	0.689	0.376	.
203	P	B	0.054	0.622	0.015	0.363	0.359888888889	.
204	A	B	0.028	0.600	0.003	0.397	0.344	.
205	R	B	0.097	0.600	0.003	0.397	0.337333333333	.
206	D	B	0.075	0.694	0.003	0.303	0.332222222222	.
207	I	B	0.054	0.782	0.003	0.216	0.310777777778	.
208	G	B	0.031	0.782	0.003	0.216	0.296555555556	.
209	P	B	0.078	0.923	0.002	0.076	0.297444444444	.
210	R	B	0.134	0.923	0.002	0.076	0.290333333333	.
211	V	B	0.085	0.923	0.002	0.076	0.286222222222	.
212	F	B	0.04	0.938	0.007	0.055	0.301333333333	.
213	T	B	0.11	0.879	0.010	0.111	0.330333333333	.
214	A	B	0.139	0.802	0.014	0.185	0.356888888889	.
215	V	B	0.149	0.717	0.014	0.269	0.379222222222	.
216	A	B	0.124	0.522	0.016	0.462	0.417666666667	.
217	G	E	0.289	0.339	0.016	0.645	0.458555555556	.
218	W	B	0.258	0.257	0.016	0.727	0.493888888889	.
219	G	B	0.299	0.181	0.016	0.803	0.524222222222	E
220	S	E	0.468	0.115	0.016	0.868	0.554666666667	E
221	E	E	0.577	0.115	0.016	0.868	0.576111111111	E
222	V	E	0.302	0.115	0.016	0.868	0.596111111111	E
223	F	B	0.199	0.058	0.017	0.925	0.602333333333	E
224	S	E	0.476	0.058	0.017	0.925	0.599	E
225	F	E	0.499	0.058	0.017	0.925	0.592222222222	E
226	R	E	0.47	0.018	0.019	0.964	0.578666666667	E
227	N	E	0.374	0.018	0.019	0.964	0.562555555556	E
228	Y	B	0.151	0.018	0.047	0.935	0.548555555556	E
229	Q	E	0.298	0.018	0.047	0.935	0.513555555556	E
230	W	B	0.165	0.064	0.216	0.721	0.483333333333	.
231	V	B	0.08	0.231	0.330	0.439	0.436	.
232	W	B	0.136	0.478	0.309	0.214	0.407777777778	.
233	V	B	0.071	0.649	0.163	0.188	0.376555555556	.
234	P	B	0.113	0.779	0.100	0.120	0.351	.
235	I	B	0.145	0.870	0.077	0.053	0.339888888889	.
236	F	B	0.188	0.831	0.044	0.125	0.330666666667	.
237	G	B	0.106	0.802	0.014	0.185	0.309	.
238	P	B	0.15	0.858	0.002	0.139	0.310666666667	.
239	H	B	0.263	0.923	0.002	0.076	0.310555555556	.
240	I	B	0.283	0.970	0.001	0.030	0.311333333333	.
241	G	B	0.139	0.970	0.001	0.030	0.304444444444	.
242	A	B	0.112	0.970	0.001	0.030	0.320555555556	.
243	I	B	0.255	0.988	0.000	0.012	0.337555555556	.
244	V	B	0.216	0.988	0.000	0.012	0.333444444444	.
245	G	B	0.115	0.988	0.000	0.012	0.330111111111	.
246	V	B	0.116	0.988	0.000	0.012	0.345	.
247	W	E	0.247	0.988	0.000	0.012	0.356	.
248	I	B	0.106	0.988	0.000	0.012	0.348	.
249	Y	B	0.086	0.970	0.001	0.030	0.366666666667	.
250	K	E	0.28	0.970	0.001	0.030	0.391777777778	.
251	L	B	0.177	0.970	0.001	0.030	0.413333333333	.
252	C	B	0.049	0.938	0.007	0.055	0.427222222222	.
253	I	B	0.16	0.717	0.014	0.269	0.459	.
254	G	B	0.247	0.257	0.016	0.727	0.492	.
255	D	E	0.471	0.058	0.017	0.925	0.511222222222	E
256	H	E	0.657	0.016	0.005	0.979	0.525333333333	E
257	W	E	0.315	0.018	0.019	0.964	0.551555555556	E
258	P	E	0.445	0.018	0.019	0.964	0.568444444444	E
259	I	E	0.347	0.058	0.017	0.925	0.581666666667	E
260	E	E	0.654	0.115	0.016	0.868	0.577222222222	E
261	T	E	0.378	0.181	0.016	0.803	0.572777777778	E
262	T	E	0.353	0.502	0.002	0.495	0.569888888889	E
263	P	E	0.594	0.782	0.003	0.216	0.564888888889	E
264	A	E	0.449	0.782	0.003	0.216	0.555666666667	E
265	L	E	0.306	0.858	0.002	0.139	0.563222222222	E
266	K	E	0.619	0.858	0.002	0.139	0.578222222222	E
267	Q	E	0.578	0.802	0.014	0.185	0.577888888889	E
268	V	E	0.362	0.717	0.014	0.269	0.584111111111	E
269	L	E	0.314	0.622	0.015	0.363	0.607777777778	E
270	S	E	0.533	0.430	0.016	0.555	0.629777777778	E
271	S	E	0.552	0.339	0.016	0.645	0.650333333333	E
272	S	E	0.489	0.339	0.016	0.645	0.666666666667	E
273	N	E	0.552	0.339	0.016	0.645	0.693	E
274	D	E	0.552	0.430	0.016	0.555	0.704666666667	E
275	K	E	0.584	0.430	0.016	0.555	0.703222222222	E
276	S	E	0.437	0.339	0.016	0.645	0.703777777778	E
277	G	E	0.417	0.339	0.016	0.645	0.701333333333	E
278	P	E	0.633	0.339	0.016	0.645	0.675222222222	E
279	A	E	0.418	0.430	0.016	0.555	0.669666666667	E
280	A	E	0.404	0.339	0.016	0.645	0.653444444444	E
281	E	E	0.589	0.257	0.016	0.727	0.632777777778	E
282	P	E	0.555	0.321	0.003	0.675	0.605555555556	E
283	K	E	0.493	0.321	0.003	0.675	0.600555555556	E
284	E	E	0.669	0.321	0.003	0.675	0.586777777778	E
285	T	E	0.563	0.339	0.016	0.645	0.522	E
286	T	E	0.45	0.181	0.016	0.803	0.449888888889	.
287	N	E	0.725	0.058	0.017	0.925	0.394333333333	.
288	I	E	0.579	0.003	0.003	0.994	0.318333333333	.

## Sheet: Chou_Fasman (turns)
Position	Residue	Start	End	Peptide	Score
4	Y	1	7	MKVYIRS	0.871
5	I	2	8	KVYIRSL	0.87
6	R	3	9	VYIRSLL	0.81
7	S	4	10	YIRSLLL	0.823
8	L	5	11	IRSLLLR	0.796
9	L	6	12	RSLLLRE	0.834
10	L	7	13	SLLLREL	0.783
11	R	8	14	LLLRELI	0.646
12	E	9	15	LLRELIN	0.784
13	L	10	16	LRELINE	0.806
14	I	11	17	RELINEF	0.807
15	N	12	18	ELINEFI	0.739
16	E	13	19	LINEFIG	0.856
17	F	14	20	INEFIGT	0.909
18	I	15	21	NEFIGTM	0.927
19	G	16	22	EFIGTML	0.789
20	T	17	23	FIGTMLL	0.767
21	M	18	24	IGTMLLI	0.749
22	L	19	25	GTMLLIL	0.766
23	L	20	26	TMLLILI	0.61
24	I	21	27	MLLILIG	0.696
25	L	22	28	LLILIGD	0.819
26	I	23	29	LILIGDS	0.939
27	G	24	30	ILIGDSI	0.921
28	D	25	31	LIGDSIM	0.94
29	S	26	32	IGDSIMA	0.95
30	I	27	33	GDSIMAI	0.95
31	M	28	34	DSIMAII	0.794
32	A	29	35	SIMAIII	0.653
33	I	30	36	IMAIIIA	0.543
34	I	31	37	MAIIIAG	0.699
35	I	32	38	AIIIAGR	0.749
36	A	33	39	IIIAGRQ	0.794
37	G	34	40	IIAGRQE	0.833
38	R	35	41	IAGRQEE	0.871
39	Q	36	42	AGRQEEN	1027
40	E	37	43	GRQEENG	1156
41	E	38	44	RQEENGH	1069
42	N	39	45	QEENGHV	1004
43	G	40	46	EENGHVI	0.931
44	H	41	47	ENGHVIG	1049
45	V	42	48	NGHVIGP	1.16
46	I	43	49	GHVIGPL	1021
47	G	44	50	HVIGPLG	1021
48	P	45	51	VIGPLGW	1023
49	L	46	52	IGPLGWG	1174
50	G	47	53	GPLGWGT	1244
51	W	48	54	PLGWGTA	1116
52	G	49	55	LGWGTAI	0.966
53	T	50	56	GWGTAIF	0.967
54	A	51	57	WGTAIFC	0.914
55	I	52	58	GTAIFCA	0.871
56	F	53	59	TAIFCAV	0.72
57	C	54	60	AIFCAVF	0.669
58	A	55	61	IFCAVFV	0.646
59	V	56	62	FCAVFVA	0.673
60	F	57	63	CAVFVAG	0.81
61	V	58	64	AVFVAGG	0.863
62	A	59	65	VFVAGGV	0.84
63	G	60	66	FVAGGVS	0.973
64	G	61	67	VAGGVSA	0.981
65	V	62	68	AGGVSAH	1046
66	S	63	69	GGVSAHI	1019
67	A	64	70	GVSAHIN	1019
68	H	65	71	VSAHINP	1013
69	I	66	72	SAHINPA	1036
70	N	67	73	AHINPAV	0.903
71	P	68	74	HINPAVT	0.946
72	A	69	75	INPAVTL	0.894
73	V	70	76	NPAVTLA	0.921
74	T	71	77	PAVTLAF	0.784
75	L	72	78	AVTLAFA	0.661
76	A	73	79	VTLAFAS	0.771
77	F	74	80	TLAFASV	0.771
78	A	75	81	LAFASVK	0.779
79	S	76	82	AFASVKE	0.8
80	V	77	83	FASVKEF	0.791
81	K	78	84	ASVKEFP	0.923
82	E	79	85	SVKEFPL	0.913
83	F	80	86	VKEFPLK	0.853
84	P	81	87	KEFPLKK	0.926
85	L	82	88	EFPLKKV	0.853
86	K	83	89	FPLKKVP	0.964
87	K	84	90	PLKKVPL	0.963
88	V	85	91	LKKVPLF	0.831
89	P	86	92	KKVPLFW	0.884
90	L	87	93	KVPLFWL	0.824
91	F	88	94	VPLFWLA	0.774
92	W	89	95	PLFWLAQ	0.843
93	L	90	96	LFWLAQY	0.789
94	A	91	97	FWLAQYL	0.789
95	Q	92	98	WLAQYLG	0.926
96	Y	93	99	LAQYLGA	0.883
97	L	94	100	AQYLGAF	0.884
98	G	95	101	QYLGAFV	0.861
99	A	96	102	YLGAFVG	0.944
100	F	97	103	LGAFVGA	0.876
101	V	98	104	GAFVGAV	0.863
102	G	99	105	AFVGAVL	0.724
103	A	100	106	FVGAVLV	0.701
104	V	101	107	VGAVLVY	0.779
105	L	102	108	GAVLVYV	0.779
106	V	103	109	AVLVYVI	0.623
107	Y	104	110	VLVYVIY	0.691
108	V	105	111	LVYVIYR	0.756
109	I	106	112	VYVIYRD	0.88
110	Y	107	113	YVIYRDA	0.903
111	R	108	114	VIYRDAI	0.807
112	D	109	115	IYRDAIN	0.959
113	A	110	116	YRDAINM	0.977
114	I	111	117	RDAINMF	0.9
115	N	112	118	DAINMFD	0.973
116	M	113	119	AINMFDG	0.987
117	F	114	120	INMFDGG	1116
118	D	115	121	NMFDGGV	1.12
119	G	116	122	MFDGGVR	1033
120	G	117	123	FDGGVRS	1151
121	V	118	124	DGGVRSV	1137
122	R	119	125	GGVRSVV	1.0
123	S	120	126	GVRSVVG	1.0
124	V	121	127	VRSVVGP	0.994
125	V	122	128	RSVVGPT	1.06
126	G	123	129	SVVGPTG	1147
127	P	124	130	VVGPTGT	1.08
128	T	125	131	VGPTGTA	1103
129	G	126	132	GPTGTAS	1236
130	T	127	133	PTGTASI	1.08
131	A	128	134	TGTASIF	0.949
132	S	129	135	GTASIFS	1016
133	I	130	136	TASIFST	0.93
134	F	131	137	ASIFSTY	0.956
135	S	132	138	SIFSTYP	1079
136	T	133	139	IFSTYPR	1.01
137	Y	134	140	FSTYPRE	1049
138	P	135	141	STYPREG	1186
139	R	136	142	TYPREGV	1053
140	E	137	143	YPREGVS	1.12
141	G	138	144	PREGVST	1094
142	V	139	145	REGVSTL	0.961
143	S	140	146	EGVSTLT	0.963
144	T	141	147	GVSTLTC	1027
145	L	142	148	VSTLTCF	0.89
146	T	143	149	STLTCFF	0.904
147	C	144	150	TLTCFFD	0.909
148	F	145	151	LTCFFDQ	0.911
149	F	146	152	TCFFDQV	0.899
150	D	147	153	CFFDQVI	0.829
151	Q	148	154	FFDQVIS	0.863
152	V	149	155	FDQVIST	0.914
153	I	150	156	DQVISTA	0.923
154	S	151	157	QVISTAV	0.786
155	T	152	158	VISTAVL	0.73
156	A	153	159	ISTAVLT	0.796
157	V	154	160	STAVLTL	0.813
158	L	155	161	TAVLTLT	0.746
159	T	156	162	AVLTLTV	0.68
160	L	157	163	VLTLTVA	0.68
161	T	158	164	LTLTVAA	0.703
162	V	159	165	TLTVAAI	0.686
163	A	160	166	LTVAAIV	0.62
164	A	161	167	TVAAIVD	0.744
165	I	162	168	VAAIVDE	0.713
166	V	163	169	AAIVDER	0.777
167	D	164	170	AIVDERN	0.906
168	E	165	171	IVDERNF	0.897
169	R	166	172	VDERNFA	0.924
170	N	167	173	DERNFAV	0.924
171	F	168	174	ERNFAVP	0.933
172	A	169	175	RNFAVPK	0.971
173	V	170	176	NFAVPKA	0.93
174	P	171	177	FAVPKAL	0.791
175	K	172	178	AVPKALV	0.777
176	A	173	179	VPKALVP	0.9
177	L	174	180	PKALVPL	0.913
178	V	175	181	KALVPLM	0.781
179	P	176	182	ALVPLML	0.721
180	L	177	183	LVPLMLG	0.85
181	M	178	184	VPLMLGM	0.851
182	L	179	185	PLMLGML	0.864
183	G	180	186	LMLGMLI	0.714
184	M	181	187	MLGMLIV	0.701
185	L	182	188	LGMLIVA	0.71
186	I	183	189	GMLIVAE	0.731
187	V	184	190	MLIVAEI	0.576
188	A	185	191	LIVAEIF	0.576
189	E	186	192	IVAEIFA	0.586
190	I	187	193	VAEIFAF	0.604
191	F	188	194	AEIFAFS	0.737
192	A	189	195	EIFAFSY	0.806
193	F	190	196	IFAFSYN	0.923
194	S	191	197	FAFSYNC	1026
195	Y	192	198	AFSYNCM	1026
196	N	193	199	FSYNCMA	1026
197	C	194	200	SYNCMAA	1034
198	M	195	201	YNCMAAL	0.914
199	A	196	202	NCMAALN	0.974
200	A	197	203	CMAALNP	0.969
201	L	198	204	MAALNPA	0.893
202	N	199	205	AALNPAR	0.943
203	P	200	206	ALNPARD	1057
204	A	201	207	LNPARDI	1.03
205	R	202	208	NPARDIG	1169
206	D	203	209	PARDIGP	1163
207	I	204	210	ARDIGPR	1081
208	G	205	211	RDIGPRV	1059
209	P	206	212	DIGPRVF	1009
210	R	207	213	IGPRVFT	0.937
211	V	208	214	GPRVFTA	0.964
212	F	209	215	PRVFTAV	0.813
213	T	210	216	RVFTAVA	0.69
214	A	211	217	VFTAVAG	0.777
215	V	212	218	FTAVAGW	0.843
216	A	213	219	TAVAGWG	0.98
217	G	214	220	AVAGWGS	1047
218	W	215	221	VAGWGSE	1059
219	G	216	222	AGWGSEV	1059
220	S	217	223	GWGSEVF	1.05
221	E	218	224	WGSEVFS	1031
222	V	219	225	GSEVFSF	0.98
223	F	220	226	SEVFSFR	0.893
224	S	221	227	EVFSFRN	0.911
225	F	222	228	VFSFRNY	0.969
226	R	223	229	FSFRNYQ	1037
227	N	224	230	SFRNYQW	1089
228	Y	225	231	FRNYQWV	0.956
229	Q	226	232	RNYQWVW	1007
230	W	227	233	NYQWVWV	0.943
231	V	228	234	YQWVWVP	0.937
232	W	229	235	QWVWVPI	0.841
233	V	230	236	WVWVPIF	0.787
234	P	231	237	VWVPIFG	0.873
235	I	232	238	WVPIFGP	1019
236	F	233	239	VPIFGPH	1017
237	G	234	240	PIFGPHI	1013
238	P	235	241	IFGPHIG	1019
239	H	236	242	FGPHIGA	1046
240	I	237	243	GPHIGAI	1027
241	G	238	244	PHIGAIV	0.876
242	A	239	245	HIGAIVG	0.881
243	I	240	246	IGAIVGV	0.817
244	V	241	247	GAIVGVW	0.887
245	G	242	248	AIVGVWI	0.731
246	V	243	249	IVGVWIY	0.8
247	W	244	250	VGVWIYK	0.877
248	I	245	251	GVWIYKL	0.89
249	Y	246	252	VWIYKLC	0.837
250	K	247	253	WIYKLCI	0.833
251	L	248	254	IYKLCIG	0.919
252	C	249	255	YKLCIGD	1.06
253	I	250	256	KLCIGDH	1033
254	G	251	257	LCIGDHW	1026
255	D	252	258	CIGDHWP	1159
256	H	253	259	IGDHWPI	1056
257	W	254	260	GDHWPIE	1094
258	P	255	261	DHWPIET	1009
259	I	256	262	HWPIETT	0.937
260	E	257	263	WPIETTP	1019
261	T	258	264	PIETTPA	0.976
262	T	259	265	IETTPAL	0.843
263	P	260	266	ETTPALK	0.92
264	A	261	267	TTPALKQ	0.954
265	L	262	268	TPALKQV	0.889
266	K	263	269	PALKQVL	0.836
267	Q	264	270	ALKQVLS	0.823
268	V	265	271	LKQVLSS	0.933
269	L	266	272	KQVLSSS	1053
270	S	267	273	QVLSSSN	1131
271	S	268	274	VLSSSND	1.2
272	S	269	275	LSSSNDK	1273
273	N	270	276	SSSNDKS	1393
274	D	271	277	SSNDKSG	1411
275	K	272	278	SNDKSGP	1424
276	S	273	279	NDKSGPA	1314
277	G	274	280	DKSGPAA	1186
278	P	275	281	KSGPAAE	1083
279	A	276	282	SGPAAEP	1156
280	A	277	283	GPAAEPK	1096
281	E	278	284	PAAEPKE	0.979
282	P	279	285	AAEPKET	0.899
283	K	280	286	AEPKETT	0.941
284	E	281	287	EPKETTN	1.07
285	T	282	288	PKETTNI	1031

## Sheet: Karplus (flex.)
Position	Residue	Start	End	Peptide	Score
4	Y	1	7	MKVYIRS	0.936
5	I	2	8	KVYIRSL	0.946
6	R	3	9	VYIRSLL	0.961
7	S	4	10	YIRSLLL	0.974
8	L	5	11	IRSLLLR	0.978
9	L	6	12	RSLLLRE	0.979
10	L	7	13	SLLLREL	0.981
11	R	8	14	LLLRELI	0.983
12	E	9	15	LLRELIN	0.984
13	L	10	16	LRELINE	0.981
14	I	11	17	RELINEF	0.972
15	N	12	18	ELINEFI	0.968
16	E	13	19	LINEFIG	0.967
17	F	14	20	INEFIGT	0.967
18	I	15	21	NEFIGTM	0.967
19	G	16	22	EFIGTML	0.969
20	T	17	23	FIGTMLL	0.961
21	M	18	24	IGTMLLI	0.941
22	L	19	25	GTMLLIL	0.928
23	L	20	26	TMLLILI	0.911
24	I	21	27	MLLILIG	0.909
25	L	22	28	LLILIGD	0.928
26	I	23	29	LILIGDS	0.952
27	G	24	30	ILIGDSI	0.978
28	D	25	31	LIGDSIM	0.981
29	S	26	32	IGDSIMA	0.965
30	I	27	33	GDSIMAI	0.93
31	M	28	34	DSIMAII	0.895
32	A	29	35	SIMAIII	0.878
33	I	30	36	IMAIIIA	0.873
34	I	31	37	MAIIIAG	0.89
35	I	32	38	AIIIAGR	0.919
36	A	33	39	IIIAGRQ	0.961
37	G	34	40	IIAGRQE	1.01
38	R	35	41	IAGRQEE	1051
39	Q	36	42	AGRQEEN	1087
40	E	37	43	GRQEENG	1097
41	E	38	44	RQEENGH	1088
42	N	39	45	QEENGHV	1065
43	G	40	46	EENGHVI	1023
44	H	41	47	ENGHVIG	0.989
45	V	42	48	NGHVIGP	0.972
46	I	43	49	GHVIGPL	0.97
47	G	44	50	HVIGPLG	0.983
48	P	45	51	VIGPLGW	0.99
49	L	46	52	IGPLGWG	0.985
50	G	47	53	GPLGWGT	0.982
51	W	48	54	PLGWGTA	0.979
52	G	49	55	LGWGTAI	0.98
53	T	50	56	GWGTAIF	0.975
54	A	51	57	WGTAIFC	0.957
55	I	52	58	GTAIFCA	0.935
56	F	53	59	TAIFCAV	0.918
57	C	54	60	AIFCAVF	0.909
58	A	55	61	IFCAVFV	0.908
59	V	56	62	FCAVFVA	0.913
60	F	57	63	CAVFVAG	0.924
61	V	58	64	AVFVAGG	0.942
62	A	59	65	VFVAGGV	0.966
63	G	60	66	FVAGGVS	0.985
64	G	61	67	VAGGVSA	0.99
65	V	62	68	AGGVSAH	0.977
66	S	63	69	GGVSAHI	0.955
67	A	64	70	GVSAHIN	0.939
68	H	65	71	VSAHINP	0.938
69	I	66	72	SAHINPA	0.95
70	N	67	73	AHINPAV	0.969
71	P	68	74	HINPAVT	0.979
72	A	69	75	INPAVTL	0.972
73	V	70	76	NPAVTLA	0.959
74	T	71	77	PAVTLAF	0.942
75	L	72	78	AVTLAFA	0.931
76	A	73	79	VTLAFAS	0.925
77	F	74	80	TLAFASV	0.928
78	A	75	81	LAFASVK	0.943
79	S	76	82	AFASVKE	0.962
80	V	77	83	FASVKEF	0.984
81	K	78	84	ASVKEFP	0.998
82	E	79	85	SVKEFPL	0.994
83	F	80	86	VKEFPLK	0.987
84	P	81	87	KEFPLKK	0.989
85	L	82	88	EFPLKKV	0.997
86	K	83	89	FPLKKVP	1.01
87	K	84	90	PLKKVPL	1013
88	V	85	91	LKKVPLF	0.996
89	P	86	92	KKVPLFW	0.965
90	L	87	93	KVPLFWL	0.935
91	F	88	94	VPLFWLA	0.911
92	W	89	95	PLFWLAQ	0.897
93	L	90	96	LFWLAQY	0.901
94	A	91	97	FWLAQYL	0.909
95	Q	92	98	WLAQYLG	0.916
96	Y	93	99	LAQYLGA	0.929
97	L	94	100	AQYLGAF	0.933
98	G	95	101	QYLGAFV	0.932
99	A	96	102	YLGAFVG	0.933
100	F	97	103	LGAFVGA	0.93
101	V	98	104	GAFVGAV	0.927
102	G	99	105	AFVGAVL	0.927
103	A	100	106	FVGAVLV	0.926
104	V	101	107	VGAVLVY	0.918
105	L	102	108	GAVLVYV	0.91
106	V	103	109	AVLVYVI	0.9
107	Y	104	110	VLVYVIY	0.891
108	V	105	111	LVYVIYR	0.901
109	I	106	112	VYVIYRD	0.922
110	Y	107	113	YVIYRDA	0.95
111	R	108	114	VIYRDAI	0.976
112	D	109	115	IYRDAIN	0.983
113	A	110	116	YRDAINM	0.965
114	I	111	117	RDAINMF	0.94
115	N	112	118	DAINMFD	0.93
116	M	113	119	AINMFDG	0.939
117	F	114	120	INMFDGG	0.974
118	D	115	121	NMFDGGV	1015
119	G	116	122	MFDGGVR	1.04
120	G	117	123	FDGGVRS	1046
121	V	118	124	DGGVRSV	1033
122	R	119	125	GGVRSVV	1013
123	S	120	126	GVRSVVG	0.997
124	V	121	127	VRSVVGP	0.988
125	V	122	128	RSVVGPT	0.995
126	G	123	129	SVVGPTG	1019
127	P	124	130	VVGPTGT	1043
128	T	125	131	VGPTGTA	1065
129	G	126	132	GPTGTAS	1069
130	T	127	133	PTGTASI	1043
131	A	128	134	TGTASIF	1009
132	S	129	135	GTASIFS	0.975
133	I	130	136	TASIFST	0.96
134	F	131	137	ASIFSTY	0.964
135	S	132	138	SIFSTYP	0.987
136	T	133	139	IFSTYPR	1.01
137	Y	134	140	FSTYPRE	1027
138	P	135	141	STYPREG	1045
139	R	136	142	TYPREGV	1045
140	E	137	143	YPREGVS	1047
141	G	138	144	PREGVST	1044
142	V	139	145	REGVSTL	1031
143	S	140	146	EGVSTLT	1021
144	T	141	147	GVSTLTC	1.0
145	L	142	148	VSTLTCF	0.973
146	T	143	149	STLTCFF	0.948
147	C	144	150	TLTCFFD	0.935
148	F	145	151	LTCFFDQ	0.942
149	F	146	152	TCFFDQV	0.958
150	D	147	153	CFFDQVI	0.977
151	Q	148	154	FFDQVIS	0.983
152	V	149	155	FDQVIST	0.982
153	I	150	156	DQVISTA	0.98
154	S	151	157	QVISTAV	0.982
155	T	152	158	VISTAVL	0.98
156	A	153	159	ISTAVLT	0.97
157	V	154	160	STAVLTL	0.96
158	L	155	161	TAVLTLT	0.95
159	T	156	162	AVLTLTV	0.943
160	L	157	163	VLTLTVA	0.941
161	T	158	164	LTLTVAA	0.933
162	V	159	165	TLTVAAI	0.919
163	A	160	166	LTVAAIV	0.908
164	A	161	167	TVAAIVD	0.912
165	I	162	168	VAAIVDE	0.933
166	V	163	169	AAIVDER	0.968
167	D	164	170	AIVDERN	1009
168	E	165	171	IVDERNF	1025
169	R	166	172	VDERNFA	1017
170	N	167	173	DERNFAV	0.991
171	F	168	174	ERNFAVP	0.966
172	A	169	175	RNFAVPK	0.962
173	V	170	176	NFAVPKA	0.974
174	P	171	177	FAVPKAL	0.992
175	K	172	178	AVPKALV	0.996
176	A	173	179	VPKALVP	0.98
177	L	174	180	PKALVPL	0.961
178	V	175	181	KALVPLM	0.935
179	P	176	182	ALVPLML	0.922
180	L	177	183	LVPLMLG	0.917
181	M	178	184	VPLMLGM	0.905
182	L	179	185	PLMLGML	0.908
183	G	180	186	LMLGMLI	0.903
184	M	181	187	MLGMLIV	0.898
185	L	182	188	LGMLIVA	0.904
186	I	183	189	GMLIVAE	0.904
187	V	184	190	MLIVAEI	0.911
188	A	185	191	LIVAEIF	0.918
189	E	186	192	IVAEIFA	0.916
190	I	187	193	VAEIFAF	0.913
191	F	188	194	AEIFAFS	0.91
192	A	189	195	EIFAFSY	0.911
193	F	190	196	IFAFSYN	0.917
194	S	191	197	FAFSYNC	0.922
195	Y	192	198	AFSYNCM	0.917
196	N	193	199	FSYNCMA	0.906
197	C	194	200	SYNCMAA	0.89
198	M	195	201	YNCMAAL	0.881
199	A	196	202	NCMAALN	0.892
200	A	197	203	CMAALNP	0.919
201	L	198	204	MAALNPA	0.959
202	N	199	205	AALNPAR	0.997
203	P	200	206	ALNPARD	1027
204	A	201	207	LNPARDI	1041
205	R	202	208	NPARDIG	1045
206	D	203	209	PARDIGP	1047
207	I	204	210	ARDIGPR	1.04
208	G	205	211	RDIGPRV	1033
209	P	206	212	DIGPRVF	1018
210	R	207	213	IGPRVFT	0.994
211	V	208	214	GPRVFTA	0.968
212	F	209	215	PRVFTAV	0.947
213	T	210	216	RVFTAVA	0.935
214	A	211	217	VFTAVAG	0.931
215	V	212	218	FTAVAGW	0.93
216	A	213	219	TAVAGWG	0.938
217	G	214	220	AVAGWGS	0.958
218	W	215	221	VAGWGSE	0.986
219	G	216	222	AGWGSEV	1015
220	S	217	223	GWGSEVF	1028
221	E	218	224	WGSEVFS	1012
222	V	219	225	GSEVFSF	0.982
223	F	220	226	SEVFSFR	0.958
224	S	221	227	EVFSFRN	0.948
225	F	222	228	VFSFRNY	0.956
226	R	223	229	FSFRNYQ	0.968
227	N	224	230	SFRNYQW	0.966
228	Y	225	231	FRNYQWV	0.953
229	Q	226	232	RNYQWVW	0.928
230	W	227	233	NYQWVWV	0.908
231	V	228	234	YQWVWVP	0.896
232	W	229	235	QWVWVPI	0.888
233	V	230	236	WVWVPIF	0.897
234	P	231	237	VWVPIFG	0.911
235	I	232	238	WVPIFGP	0.933
236	F	233	239	VPIFGPH	0.96
237	G	234	240	PIFGPHI	0.979
238	P	235	241	IFGPHIG	0.984
239	H	236	242	FGPHIGA	0.97
240	I	237	243	GPHIGAI	0.948
241	G	238	244	PHIGAIV	0.929
242	A	239	245	HIGAIVG	0.918
243	I	240	246	IGAIVGV	0.914
244	V	241	247	GAIVGVW	0.91
245	G	242	248	AIVGVWI	0.901
246	V	243	249	IVGVWIY	0.893
247	W	244	250	VGVWIYK	0.894
248	I	245	251	GVWIYKL	0.909
249	Y	246	252	VWIYKLC	0.93
250	K	247	253	WIYKLCI	0.949
251	L	248	254	IYKLCIG	0.959
252	C	249	255	YKLCIGD	0.967
253	I	250	256	KLCIGDH	0.974
254	G	251	257	LCIGDHW	0.984
255	D	252	258	CIGDHWP	0.988
256	H	253	259	IGDHWPI	0.979
257	W	254	260	GDHWPIE	0.974
258	P	255	261	DHWPIET	0.976
259	I	256	262	HWPIETT	0.995
260	E	257	263	WPIETTP	1024
261	T	258	264	PIETTPA	1042
262	T	259	265	IETTPAL	1043
263	P	260	266	ETTPALK	1036
264	A	261	267	TTPALKQ	1021
265	L	262	268	TPALKQV	1.01
266	K	263	269	PALKQVL	1005
267	Q	264	270	ALKQVLS	0.999
268	V	265	271	LKQVLSS	1004
269	L	266	272	KQVLSSS	1026
270	S	267	273	QVLSSSN	1057
271	S	268	274	VLSSSND	1.09
272	S	269	275	LSSSNDK	1109
273	N	270	276	SSSNDKS	1113
274	D	271	277	SSNDKSG	1109
275	K	272	278	SNDKSGP	1109
276	S	273	279	NDKSGPA	1105
277	G	274	280	DKSGPAA	1087
278	P	275	281	KSGPAAE	1.06
279	A	276	282	SGPAAEP	1029
280	A	277	283	GPAAEPK	1015
281	E	278	284	PAAEPKE	1025
282	P	279	285	AAEPKET	1044
283	K	280	286	AEPKETT	1066
284	E	281	287	EPKETTN	1073

## Sheet: Parker (hidroph.)
Position	Residue	Start	End	Peptide	Score
4	Y	1	7	MKVYIRS	-0.2
5	I	2	8	KVYIRSL	-0.914
6	R	3	9	VYIRSLL	-3043
7	S	4	10	YIRSLLL	-3829
8	L	5	11	IRSLLLR	-2957
9	L	6	12	RSLLLRE	-0.7
10	L	7	13	SLLLREL	-2614
11	R	8	14	LLLRELI	-4686
12	E	9	15	LLRELIN	-2371
13	L	10	16	LRELINE	0.057
14	I	11	17	RELINEF	0.057
15	N	12	18	ELINEFI	-1686
16	E	13	19	LINEFIG	-1986
17	F	14	20	INEFIGT	0.071
18	I	15	21	NEFIGTM	0.614
19	G	16	22	EFIGTML	-1.7
20	T	17	23	FIGTMLL	-4129
21	M	18	24	IGTMLLI	-3957
22	L	19	25	GTMLLIL	-4129
23	L	20	26	TMLLILI	-6086
24	I	21	27	MLLILIG	-6014
25	L	22	28	LLILIGD	-3986
26	I	23	29	LILIGDS	-1743
27	G	24	30	ILIGDSI	-1571
28	D	25	31	LIGDSIM	-1029
29	S	26	32	IGDSIMA	0.586
30	I	27	33	GDSIMAI	0.586
31	M	28	34	DSIMAII	-1371
32	A	29	35	SIMAIII	-3943
33	I	30	36	IMAIIIA	-4571
34	I	31	37	MAIIIAG	-2614
35	I	32	38	AIIIAGR	-1414
36	A	33	39	IIIAGRQ	-0.857
37	G	34	40	IIAGRQE	1.4
38	R	35	41	IAGRQEE	3657
39	Q	36	42	AGRQEEN	5.8
40	E	37	43	GRQEENG	6314
41	E	38	44	RQEENGH	5.8
42	N	39	45	QEENGHV	4671
43	G	40	46	EENGHVI	2671
44	H	41	47	ENGHVIG	2371
45	V	42	48	NGHVIGP	1557
46	I	43	49	GHVIGPL	-0.757
47	G	44	50	HVIGPLG	-0.757
48	P	45	51	VIGPLGW	-2486
49	L	46	52	IGPLGWG	-1143
50	G	47	53	GPLGWGT	0.743
51	W	48	54	PLGWGTA	0.229
52	G	49	55	LGWGTAI	-1214
53	T	50	56	GWGTAIF	-1214
54	A	51	57	WGTAIFC	-1829
55	I	52	58	GTAIFCA	-0.1
56	F	53	59	TAIFCAV	-1443
57	C	54	60	AIFCAVF	-3.5
58	A	55	61	IFCAVFV	-4329
59	V	56	62	FCAVFVA	-2886
60	F	57	63	CAVFVAG	-0.757
61	V	58	64	AVFVAGG	-0.143
62	A	59	65	VFVAGGV	-0.971
63	G	60	66	FVAGGVS	0.486
64	G	61	67	VAGGVSA	2.1
65	V	62	68	AGGVSAH	2929
66	S	63	69	GGVSAHI	1486
67	A	64	70	GVSAHIN	1671
68	H	65	71	VSAHINP	1157
69	I	66	72	SAHINPA	1986
70	N	67	73	AHINPAV	0.529
71	P	68	74	HINPAVT	0.971
72	A	69	75	INPAVTL	-0.643
73	V	70	76	NPAVTLA	0.8
74	T	71	77	PAVTLAF	-1514
75	L	72	78	AVTLAFA	-1514
76	A	73	79	VTLAFAS	-0.886
77	F	74	80	TLAFASV	-0.886
78	A	75	81	LAFASVK	-0.814
79	S	76	82	AFASVKE	1614
80	V	77	83	FASVKEF	0.0
81	K	78	84	ASVKEFP	1614
82	E	79	85	SVKEFPL	0.0
83	F	80	86	VKEFPLK	-0.114
84	P	81	87	KEFPLKK	1229
85	L	82	88	EFPLKKV	-0.114
86	K	83	89	FPLKKVP	-0.929
87	K	84	90	PLKKVPL	-0.929
88	V	85	91	LKKVPLF	-2543
89	P	86	92	KKVPLFW	-2657
90	L	87	93	KVPLFWL	-4786
91	F	88	94	VPLFWLA	-5.3
92	W	89	95	PLFWLAQ	-3914
93	L	90	96	LFWLAQY	-4486
94	A	91	97	FWLAQYL	-4486
95	Q	92	98	WLAQYLG	-2357
96	Y	93	99	LAQYLGA	-0.629
97	L	94	100	AQYLGAF	-0.629
98	G	95	101	QYLGAFV	-1457
99	A	96	102	YLGAFVG	-1.5
100	F	97	103	LGAFVGA	-0.929
101	V	98	104	GAFVGAV	-0.143
102	G	99	105	AFVGAVL	-2271
103	A	100	106	FVGAVLV	-3.1
104	V	101	107	VGAVLVY	-2057
105	L	102	108	GAVLVYV	-2057
106	V	103	109	AVLVYVI	-4014
107	Y	104	110	VLVYVIY	-4586
108	V	105	111	LVYVIYR	-3457
109	I	106	112	VYVIYRD	-0.714
110	Y	107	113	YVIYRDA	0.114
111	R	108	114	VIYRDAI	-0.757
112	D	109	115	IYRDAIN	0.771
113	A	110	116	YRDAINM	1314
114	I	111	117	RDAINMF	0.271
115	N	112	118	DAINMFD	1.1
116	M	113	119	AINMFDG	0.486
117	F	114	120	INMFDGG	1.0
118	D	115	121	NMFDGGV	1614
119	G	116	122	MFDGGVR	1214
120	G	117	123	FDGGVRS	2743
121	V	118	124	DGGVRSV	3529
122	R	119	125	GGVRSVV	1571
123	S	120	126	GVRSVVG	1571
124	V	121	127	VRSVVGP	1057
125	V	122	128	RSVVGPT	2329
126	G	123	129	SVVGPTG	2543
127	P	124	130	VVGPTGT	2357
128	T	125	131	VGPTGTA	3186
129	G	126	132	GPTGTAS	4643
130	T	127	133	PTGTASI	2686
131	A	128	134	TGTASIF	1071
132	S	129	135	GTASIFS	1257
133	I	130	136	TASIFST	1186
134	F	131	137	ASIFSTY	0.171
135	S	132	138	SIFSTYP	0.171
136	T	133	139	IFSTYPR	-0.157
137	Y	134	140	FSTYPRE	2.1
138	P	135	141	STYPREG	4229
139	R	136	142	TYPREGV	2771
140	E	137	143	YPREGVS	2957
141	G	138	144	PREGVST	3971
142	V	139	145	REGVSTL	2357
143	S	140	146	EGVSTLT	2.5
144	T	141	147	GVSTLTC	1586
145	L	142	148	VSTLTCF	-0.543
146	T	143	149	STLTCFF	-1329
147	C	144	150	TLTCFFD	-0.829
148	F	145	151	LTCFFDQ	-0.714
149	F	146	152	TCFFDQV	0.071
150	D	147	153	CFFDQVI	-1814
151	Q	148	154	FFDQVIS	-1086
152	V	149	155	FDQVIST	0.971
153	I	150	156	DQVISTA	2586
154	S	151	157	QVISTAV	0.629
155	T	152	158	VISTAVL	-1543
156	A	153	159	ISTAVLT	-0.271
157	V	154	160	STAVLTL	-0.443
158	L	155	161	TAVLTLT	-0.629
159	T	156	162	AVLTLTV	-1.9
160	L	157	163	VLTLTVA	-1.9
161	T	158	164	LTLTVAA	-1071
162	V	159	165	TLTVAAI	-0.9
163	A	160	166	LTVAAIV	-2171
164	A	161	167	TVAAIVD	0.571
165	I	162	168	VAAIVDE	0.943
166	V	163	169	AAIVDER	2071
167	D	164	170	AIVDERN	2771
168	E	165	171	IVDERNF	1157
169	R	166	172	VDERNFA	2.6
170	N	167	173	DERNFAV	2.6
171	F	168	174	ERNFAVP	1471
172	A	169	175	RNFAVPK	1171
173	V	170	176	NFAVPKA	0.871
174	P	171	177	FAVPKAL	-1443
175	K	172	178	AVPKALV	-0.657
176	A	173	179	VPKALVP	-0.657
177	L	174	180	PKALVPL	-1443
178	V	175	181	KALVPLM	-2343
179	P	176	182	ALVPLML	-4471
180	L	177	183	LVPLMLG	-3957
181	M	178	184	VPLMLGM	-3243
182	L	179	185	PLMLGML	-4029
183	G	180	186	LMLGMLI	-5471
184	M	181	187	MLGMLIV	-4686
185	L	182	188	LGMLIVA	-3786
186	I	183	189	GMLIVAE	-1357
187	V	184	190	MLIVAEI	-3314
188	A	185	191	LIVAEIF	-4029
189	E	186	192	IVAEIFA	-2414
190	I	187	193	VAEIFAF	-2586
191	F	188	194	AEIFAFS	-1129
192	A	189	195	EIFAFSY	-1.7
193	F	190	196	IFAFSYN	-1814
194	S	191	197	FAFSYNC	-0.471
195	Y	192	198	AFSYNCM	0.243
196	N	193	199	FSYNCMA	0.243
197	C	194	200	SYNCMAA	1857
198	M	195	201	YNCMAAL	-0.386
199	A	196	202	NCMAALN	0.886
200	A	197	203	CMAALNP	0.186
201	L	198	204	MAALNPA	0.286
202	N	199	205	AALNPAR	1486
203	P	200	206	ALNPARD	2614
204	A	201	207	LNPARDI	1171
205	R	202	208	NPARDIG	3.3
206	D	203	209	PARDIGP	2.6
207	I	204	210	ARDIGPR	2.9
208	G	205	211	RDIGPRV	2071
209	P	206	212	DIGPRVF	0.157
210	R	207	213	IGPRVFT	-0.529
211	V	208	214	GPRVFTA	0.914
212	F	209	215	PRVFTAV	-0.429
213	T	210	216	RVFTAVA	-0.429
214	A	211	217	VFTAVAG	-0.214
215	V	212	218	FTAVAGW	-1114
216	A	213	219	TAVAGWG	1014
217	G	214	220	AVAGWGS	1.2
218	W	215	221	VAGWGSE	2014
219	G	216	222	AGWGSEV	2014
220	S	217	223	GWGSEVF	0.4
221	E	218	224	WGSEVFS	0.514
222	V	219	225	GSEVFSF	0.629
223	F	220	226	SEVFSFR	0.414
224	S	221	227	EVFSFRN	0.486
225	F	222	228	VFSFRNY	-0.9
226	R	223	229	FSFRNYQ	0.486
227	N	224	230	SFRNYQW	0.371
228	Y	225	231	FRNYQWV	-1086
229	Q	226	232	RNYQWVW	-1.2
230	W	227	233	NYQWVWV	-2329
231	V	228	234	YQWVWVP	-3029
232	W	229	235	QWVWVPI	-3.9
233	V	230	236	WVWVPIF	-6071
234	P	231	237	VWVPIFG	-3829
235	I	232	238	WVPIFGP	-3.0
236	F	233	239	VPIFGPH	-1271
237	G	234	240	PIFGPHI	-1886
238	P	235	241	IFGPHIG	-1371
239	H	236	242	FGPHIGA	0.071
240	I	237	243	GPHIGAI	0.243
241	G	238	244	PHIGAIV	-1.1
242	A	239	245	HIGAIVG	-0.586
243	I	240	246	IGAIVGV	-1414
244	V	241	247	GAIVGVW	-1.7
245	G	242	248	AIVGVWI	-3657
246	V	243	249	IVGVWIY	-4229
247	W	244	250	VGVWIYK	-2271
248	I	245	251	GVWIYKL	-3057
249	Y	246	252	VWIYKLC	-3671
250	K	247	253	WIYKLCI	-4286
251	L	248	254	IYKLCIG	-2043
252	C	249	255	YKLCIGD	0.529
253	I	250	256	KLCIGDH	1.1
254	G	251	257	LCIGDHW	-1143
255	D	252	258	CIGDHWP	0.471
256	H	253	259	IGDHWPI	-0.871
257	W	254	260	GDHWPIE	1386
258	P	255	261	DHWPIET	1314
259	I	256	262	HWPIETT	0.629
260	E	257	263	WPIETTP	0.629
261	T	258	264	PIETTPA	2357
262	T	259	265	IETTPAL	0.743
263	P	260	266	ETTPALK	2.7
264	A	261	267	TTPALKQ	2443
265	L	262	268	TPALKQV	1171
266	K	263	269	PALKQVL	-0.886
267	Q	264	270	ALKQVLS	-0.257
268	V	265	271	LKQVLSS	0.371
269	L	266	272	KQVLSSS	2614
270	S	267	273	QVLSSSN	2.8
271	S	268	274	VLSSSND	3371
272	S	269	275	LSSSNDK	4714
273	N	270	276	SSSNDKS	6957
274	D	271	277	SSNDKSG	6843
275	K	272	278	SNDKSGP	6214
276	S	273	279	NDKSGPA	5586
277	G	274	280	DKSGPAA	4886
278	P	275	281	KSGPAAE	4571
279	A	276	282	SGPAAEP	4057
280	A	277	283	GPAAEPK	3943
281	E	278	284	PAAEPKE	4243
282	P	279	285	AAEPKET	4686
283	K	280	286	AEPKETT	5129
284	E	281	287	EPKETTN	5829
285	T	282	288	PKETTNI	3571

## Sheet: Kolaskar (antig.)
Position	Residue	Start	End	Peptide	Score
4	Y	1	7	MKVYIRS	1048
5	I	2	8	KVYIRSL	1109
6	R	3	9	VYIRSLL	1154
7	S	4	10	YIRSLLL	1135
8	L	5	11	IRSLLLR	1094
9	L	6	12	RSLLLRE	1051
10	L	7	13	SLLLREL	1105
11	R	8	14	LLLRELI	1125
12	E	9	15	LLRELIN	1057
13	L	10	16	LRELINE	1.0
14	I	11	17	RELINEF	0.978
15	N	12	18	ELINEFI	1018
16	E	13	19	LINEFIG	1021
17	F	14	20	INEFIGT	0.972
18	I	15	21	NEFIGTM	0.926
19	G	16	22	EFIGTML	0.993
20	T	17	23	FIGTMLL	1.05
21	M	18	24	IGTMLLI	1059
22	L	19	25	GTMLLIL	1073
23	L	20	26	TMLLILI	1113
24	I	21	27	MLLILIG	1108
25	L	22	28	LLILIGD	1113
26	I	23	29	LILIGDS	1079
27	G	24	30	ILIGDSI	1065
28	D	25	31	LIGDSIM	1019
29	S	26	32	IGDSIMA	0.992
30	I	27	33	GDSIMAI	0.992
31	M	28	34	DSIMAII	1032
32	A	29	35	SIMAIII	1073
33	I	30	36	IMAIIIA	1.08
34	I	31	37	MAIIIAG	1041
35	I	32	38	AIIIAGR	1047
36	A	33	39	IIIAGRQ	1.04
37	G	34	40	IIAGRQE	0.997
38	R	35	41	IAGRQEE	0.954
39	Q	36	42	AGRQEEN	0.901
40	E	37	43	GRQEENG	0.873
41	E	38	44	RQEENGH	0.906
42	N	39	45	QEENGHV	0.979
43	G	40	46	EENGHVI	0.999
44	H	41	47	ENGHVIG	1002
45	V	42	48	NGHVIGP	1033
46	I	43	49	GHVIGPL	1.1
47	G	44	50	HVIGPLG	1.1
48	P	45	51	VIGPLGW	1.07
49	L	46	52	IGPLGWG	0.997
50	G	47	53	GPLGWGT	0.963
51	W	48	54	PLGWGTA	0.99
52	G	49	55	LGWGTAI	1002
53	T	50	56	GWGTAIF	0.98
54	A	51	57	WGTAIFC	1056
55	I	52	58	GTAIFCA	1081
56	F	53	59	TAIFCAV	1154
57	C	54	60	AIFCAVF	1.18
58	A	55	61	IFCAVFV	1225
59	V	56	62	FCAVFVA	1213
60	F	57	63	CAVFVAG	1182
61	V	58	64	AVFVAGG	1105
62	A	59	65	VFVAGGV	1.15
63	G	60	66	FVAGGVS	1097
64	G	61	67	VAGGVSA	1093
65	V	62	68	AGGVSAH	1054
66	S	63	69	GGVSAHI	1066
67	A	64	70	GVSAHIN	1052
68	H	65	71	VSAHINP	1079
69	I	66	72	SAHINPA	1034
70	N	67	73	AHINPAV	1087
71	P	68	74	HINPAVT	1065
72	A	69	75	INPAVTL	1085
73	V	70	76	NPAVTLA	1073
74	T	71	77	PAVTLAF	1118
75	L	72	78	AVTLAFA	1118
76	A	73	79	VTLAFAS	1.11
77	F	74	80	TLAFASV	1.11
78	A	75	81	LAFASVK	1113
79	S	76	82	AFASVKE	1056
80	V	77	83	FASVKEF	1.06
81	K	78	84	ASVKEFP	1056
82	E	79	85	SVKEFPL	1083
83	F	80	86	VKEFPLK	1071
84	P	81	87	KEFPLKK	1007
85	L	82	88	EFPLKKV	1071
86	K	83	89	FPLKKVP	1102
87	K	84	90	PLKKVPL	1124
88	V	85	91	LKKVPLF	1128
89	P	86	92	KKVPLFW	1077
90	L	87	93	KVPLFWL	1123
91	F	88	94	VPLFWLA	1142
92	W	89	95	PLFWLAQ	1.09
93	L	90	96	LFWLAQY	1103
94	A	91	97	FWLAQYL	1103
95	Q	92	98	WLAQYLG	1072
96	Y	93	99	LAQYLGA	1097
97	L	94	100	AQYLGAF	1074
98	G	95	101	QYLGAFV	1.12
99	A	96	102	YLGAFVG	1.1
100	F	97	103	LGAFVGA	1086
101	V	98	104	GAFVGAV	1105
102	G	99	105	AFVGAVL	1158
103	A	100	106	FVGAVLV	1204
104	V	101	107	VGAVLVY	1214
105	L	102	108	GAVLVYV	1214
106	V	103	109	AVLVYVI	1254
107	Y	104	110	VLVYVIY	1268
108	V	105	111	LVYVIYR	1195
109	I	106	112	VYVIYRD	1.14
110	Y	107	113	YVIYRDA	1094
111	R	108	114	VIYRDAI	1093
112	D	109	115	IYRDAIN	1006
113	A	110	116	YRDAINM	0.96
114	I	111	117	RDAINMF	0.95
115	N	112	118	DAINMFD	0.949
116	M	113	119	AINMFDG	0.95
117	F	114	120	INMFDGG	0.923
118	D	115	121	NMFDGGV	0.956
119	G	116	122	MFDGGVR	0.97
120	G	117	123	FDGGVRS	0.996
121	V	118	124	DGGVRSV	1038
122	R	119	125	GGVRSVV	1112
123	S	120	126	GVRSVVG	1112
124	V	121	127	VRSVVGP	1139
125	V	122	128	RSVVGPT	1071
126	G	123	129	SVVGPTG	1071
127	P	124	130	VVGPTGT	1057
128	T	125	131	VGPTGTA	1011
129	G	126	132	GPTGTAS	0.958
130	T	127	133	PTGTASI	0.998
131	A	128	134	TGTASIF	1002
132	S	129	135	GTASIFS	1016
133	I	130	136	TASIFST	1021
134	F	131	137	ASIFSTY	1057
135	S	132	138	SIFSTYP	1057
136	T	133	139	IFSTYPR	1037
137	Y	134	140	FSTYPRE	0.994
138	P	135	141	STYPREG	0.963
139	R	136	142	TYPREGV	1016
140	E	137	143	YPREGVS	1031
141	G	138	144	PREGVST	0.995
142	V	139	145	REGVSTL	1022
143	S	140	146	EGVSTLT	1027
144	T	141	147	GVSTLTC	1107
145	L	142	148	VSTLTCF	1138
146	T	143	149	STLTCFF	1096
147	C	144	150	TLTCFFD	1075
148	F	145	151	LTCFFDQ	1091
149	F	146	152	TCFFDQV	1.11
150	D	147	153	CFFDQVI	1144
151	Q	148	154	FFDQVIS	1087
152	V	149	155	FDQVIST	1061
153	I	150	156	DQVISTA	1057
154	S	151	157	QVISTAV	1131
155	T	152	158	VISTAVL	1165
156	A	153	159	ISTAVLT	1097
157	V	154	160	STAVLTL	1111
158	L	155	161	TAVLTLT	1096
159	T	156	162	AVLTLTV	1164
160	L	157	163	VLTLTVA	1164
161	T	158	164	LTLTVAA	1118
162	V	159	165	TLTVAAI	1104
163	A	160	166	LTVAAIV	1172
164	A	161	167	TVAAIVD	1117
165	I	162	168	VAAIVDE	1109
166	V	163	169	AAIVDER	1036
167	D	164	170	AIVDERN	0.995
168	E	165	171	IVDERNF	0.999
169	R	166	172	VDERNFA	0.986
170	N	167	173	DERNFAV	0.986
171	F	168	174	ERNFAVP	1015
172	A	169	175	RNFAVPK	1026
173	V	170	176	NFAVPKA	1053
174	P	171	177	FAVPKAL	1121
175	K	172	178	AVPKALV	1163
176	A	173	179	VPKALVP	1163
177	L	174	180	PKALVPL	1144
178	V	175	181	KALVPLM	1.11
179	P	176	182	ALVPLML	1155
180	L	177	183	LVPLMLG	1128
181	M	178	184	VPLMLGM	1068
182	L	179	185	PLMLGML	1049
183	G	180	186	LMLGMLI	1061
184	M	181	187	MLGMLIV	1.08
185	L	182	188	LGMLIVA	1114
186	I	183	189	GMLIVAE	1057
187	V	184	190	MLIVAEI	1097
188	A	185	191	LIVAEIF	1135
189	E	186	192	IVAEIFA	1108
190	I	187	193	VAEIFAF	1099
191	F	188	194	AEIFAFS	1046
192	A	189	195	EIFAFSY	1.06
193	F	190	196	IFAFSYN	1.05
194	S	191	197	FAFSYNC	1087
195	Y	192	198	AFSYNCM	1049
196	N	193	199	FSYNCMA	1049
197	C	194	200	SYNCMAA	1045
198	M	195	201	YNCMAAL	1079
199	A	196	202	NCMAALN	1024
200	A	197	203	CMAALNP	1065
201	L	198	204	MAALNPA	1015
202	N	199	205	AALNPAR	1022
203	P	200	206	ALNPARD	0.994
204	A	201	207	LNPARDI	1006
205	R	202	208	NPARDIG	0.953
206	D	203	209	PARDIGP	0.994
207	I	204	210	ARDIGPR	0.967
208	G	205	211	RDIGPRV	1012
209	P	206	212	DIGPRVF	1043
210	R	207	213	IGPRVFT	1049
211	V	208	214	GPRVFTA	1037
212	F	209	215	PRVFTAV	1.11
213	T	210	216	RVFTAVA	1.11
214	A	211	217	VFTAVAG	1.11
215	V	212	218	FTAVAGW	1.04
216	A	213	219	TAVAGWG	1009
217	G	214	220	AVAGWGS	1023
218	W	215	221	VAGWGSE	0.993
219	G	216	222	AGWGSEV	0.993
220	S	217	223	GWGSEVF	0.997
221	E	218	224	WGSEVFS	1017
222	V	219	225	GSEVFSF	1045
223	F	220	226	SEVFSFR	1045
224	S	221	227	EVFSFRN	1011
225	F	222	228	VFSFRNY	1055
226	R	223	229	FSFRNYQ	1003
227	N	224	230	SFRNYQW	0.974
228	Y	225	231	FRNYQWV	1027
229	Q	226	232	RNYQWVW	0.999
230	W	227	233	NYQWVWV	1072
231	V	228	234	YQWVWVP	1113
232	W	229	235	QWVWVPI	1112
233	V	230	236	WVWVPIF	1123
234	P	231	237	VWVPIFG	1.12
235	I	232	238	WVPIFGP	1074
236	F	233	239	VPIFGPH	1105
237	G	234	240	PIFGPHI	1072
238	P	235	241	IFGPHIG	1045
239	H	236	242	FGPHIGA	1032
240	I	237	243	GPHIGAI	1041
241	G	238	244	PHIGAIV	1113
242	A	239	245	HIGAIVG	1086
243	I	240	246	IGAIVGV	1126
244	V	241	247	GAIVGVW	1089
245	G	242	248	AIVGVWI	1129
246	V	243	249	IVGVWIY	1143
247	W	244	250	VGVWIYK	1111
248	I	245	251	GVWIYKL	1092
249	Y	246	252	VWIYKLC	1169
250	K	247	253	WIYKLCI	1136
251	L	248	254	IYKLCIG	1133
252	C	249	255	YKLCIGD	1092
253	I	250	256	KLCIGDH	1084
254	G	251	257	LCIGDHW	1079
255	D	252	258	CIGDHWP	1052
256	H	253	259	IGDHWPI	1015
257	W	254	260	GDHWPIE	0.972
258	P	255	261	DHWPIET	0.977
259	I	256	262	HWPIETT	0.983
260	E	257	263	WPIETTP	0.977
261	T	258	264	PIETTPA	1002
262	T	259	265	IETTPAL	1028
263	P	260	266	ETTPALK	0.997
264	A	261	267	TTPALKQ	1.02
265	L	262	268	TPALKQV	1088
266	K	263	269	PALKQVL	1137
267	Q	264	270	ALKQVLS	1129
268	V	265	271	LKQVLSS	1122
269	L	266	272	KQVLSSS	1088
270	S	267	273	QVLSSSN	1066
271	S	268	274	VLSSSND	1044
272	S	269	275	LSSSNDK	0.98
273	N	270	276	SSSNDKS	0.946
274	D	271	277	SSNDKSG	0.926
275	K	272	278	SNDKSGP	0.933
276	S	273	279	NDKSGPA	0.941
277	G	274	280	DKSGPAA	0.982
278	P	275	281	KSGPAAE	0.98
279	A	276	282	SGPAAEP	0.999
280	A	277	283	GPAAEPK	0.987
281	E	278	284	PAAEPKE	0.984
282	P	279	285	AAEPKET	0.962
283	K	280	286	AEPKETT	0.94
284	E	281	287	EPKETTN	0.899
285	T	282	288	PKETTNI	0.942

## Sheet: BepiPred 2.0 Epit
Position	Residue	Score	Assignment
0	M	0.280	.
1	K	0.338	.
2	V	0.397	.
3	Y	0.454	.
4	I	0.504	E
5	R	0.494	.
6	S	0.477	.
7	L	0.465	.
8	L	0.437	.
9	L	0.425	.
10	R	0.407	.
11	E	0.387	.
12	L	0.363	.
13	I	0.354	.
14	N	0.341	.
15	E	0.320	.
16	F	0.307	.
17	I	0.302	.
18	G	0.286	.
19	T	0.267	.
20	M	0.258	.
21	L	0.256	.
22	L	0.243	.
23	I	0.248	.
24	L	0.265	.
25	I	0.267	.
26	G	0.276	.
27	D	0.272	.
28	S	0.288	.
29	I	0.300	.
30	M	0.327	.
31	A	0.363	.
32	I	0.397	.
33	I	0.427	.
34	I	0.475	.
35	A	0.514	E
36	G	0.559	E
37	R	0.585	E
38	Q	0.607	E
39	E	0.610	E
40	E	0.595	E
41	N	0.575	E
42	G	0.539	E
43	H	0.499	.
44	V	0.469	.
45	I	0.446	.
46	G	0.424	.
47	P	0.404	.
48	L	0.385	.
49	G	0.376	.
50	W	0.375	.
51	G	0.371	.
52	T	0.354	.
53	A	0.336	.
54	I	0.323	.
55	F	0.317	.
56	C	0.308	.
57	A	0.302	.
58	V	0.322	.
59	F	0.339	.
60	V	0.363	.
61	A	0.402	.
62	G	0.437	.
63	G	0.457	.
64	V	0.463	.
65	S	0.468	.
66	A	0.469	.
67	H	0.438	.
68	I	0.403	.
69	N	0.367	.
70	P	0.330	.
71	A	0.286	.
72	V	0.270	.
73	T	0.260	.
74	L	0.260	.
75	A	0.275	.
76	F	0.320	.
77	A	0.364	.
78	S	0.405	.
79	V	0.448	.
80	K	0.484	.
81	E	0.510	E
82	F	0.539	E
83	P	0.538	E
84	L	0.541	E
85	K	0.512	E
86	K	0.485	.
87	V	0.456	.
88	P	0.414	.
89	L	0.389	.
90	F	0.363	.
91	W	0.344	.
92	L	0.340	.
93	A	0.312	.
94	Q	0.303	.
95	Y	0.289	.
96	L	0.281	.
97	G	0.280	.
98	A	0.280	.
99	F	0.270	.
100	V	0.261	.
101	G	0.251	.
102	A	0.255	.
103	V	0.258	.
104	L	0.266	.
105	V	0.285	.
106	Y	0.318	.
107	V	0.345	.
108	I	0.373	.
109	Y	0.400	.
110	R	0.439	.
111	D	0.473	.
112	A	0.494	.
113	I	0.536	E
114	N	0.567	E
115	M	0.585	E
116	F	0.603	E
117	D	0.630	E
118	G	0.636	E
119	G	0.640	E
120	V	0.659	E
121	R	0.675	E
122	S	0.663	E
123	V	0.660	E
124	V	0.645	E
125	G	0.630	E
126	P	0.590	E
127	T	0.577	E
128	G	0.544	E
129	T	0.491	.
130	A	0.443	.
131	S	0.405	.
132	I	0.386	.
133	F	0.380	.
134	S	0.384	.
135	T	0.419	.
136	Y	0.436	.
137	P	0.458	.
138	R	0.493	.
139	E	0.523	E
140	G	0.541	E
141	V	0.534	E
142	S	0.527	E
143	T	0.515	E
144	L	0.468	.
145	T	0.443	.
146	C	0.438	.
147	F	0.414	.
148	F	0.402	.
149	D	0.391	.
150	Q	0.374	.
151	V	0.351	.
152	I	0.333	.
153	S	0.328	.
154	T	0.319	.
155	A	0.298	.
156	V	0.277	.
157	L	0.253	.
158	T	0.240	.
159	L	0.245	.
160	T	0.247	.
161	V	0.253	.
162	A	0.273	.
163	A	0.306	.
164	I	0.352	.
165	V	0.408	.
166	D	0.463	.
167	E	0.510	E
168	R	0.542	E
169	N	0.578	E
170	F	0.612	E
171	A	0.628	E
172	V	0.615	E
173	P	0.597	E
174	K	0.571	E
175	A	0.536	E
176	L	0.502	E
177	V	0.465	.
178	P	0.438	.
179	L	0.400	.
180	M	0.378	.
181	L	0.357	.
182	G	0.335	.
183	M	0.308	.
184	L	0.305	.
185	I	0.306	.
186	V	0.320	.
187	A	0.318	.
188	E	0.325	.
189	I	0.319	.
190	F	0.330	.
191	A	0.348	.
192	F	0.363	.
193	S	0.370	.
194	Y	0.375	.
195	N	0.373	.
196	C	0.381	.
197	M	0.393	.
198	A	0.399	.
199	A	0.380	.
200	L	0.368	.
201	N	0.371	.
202	P	0.358	.
203	A	0.344	.
204	R	0.336	.
205	D	0.331	.
206	I	0.310	.
207	G	0.296	.
208	P	0.296	.
209	R	0.289	.
210	V	0.285	.
211	F	0.303	.
212	T	0.330	.
213	A	0.358	.
214	V	0.381	.
215	A	0.421	.
216	G	0.465	.
217	W	0.502	E
218	G	0.537	E
219	S	0.566	E
220	E	0.586	E
221	V	0.607	E
222	F	0.612	E
223	S	0.606	E
224	F	0.597	E
225	R	0.580	E
226	N	0.564	E
227	Y	0.546	E
228	Q	0.514	E
229	W	0.482	.
230	V	0.435	.
231	W	0.404	.
232	V	0.373	.
233	P	0.348	.
234	I	0.336	.
235	F	0.327	.
236	G	0.304	.
237	P	0.302	.
238	H	0.300	.
239	I	0.301	.
240	G	0.296	.
241	A	0.313	.
242	I	0.331	.
243	V	0.327	.
244	G	0.324	.
245	V	0.340	.
246	W	0.352	.
247	I	0.344	.
248	Y	0.361	.
249	K	0.389	.
250	L	0.412	.
251	C	0.431	.
252	I	0.468	.
253	G	0.503	E
254	D	0.523	E
255	H	0.544	E
256	W	0.568	E
257	P	0.586	E
258	I	0.599	E
259	E	0.594	E
260	T	0.583	E
261	T	0.573	E
262	P	0.572	E
263	A	0.566	E
264	L	0.567	E
265	K	0.586	E
266	Q	0.589	E
267	V	0.595	E
268	L	0.615	E
269	S	0.635	E
270	S	0.646	E
271	S	0.648	E
272	N	0.657	E
273	D	0.662	E
274	K	0.648	E
275	S	0.650	E
276	G	0.641	E
277	P	0.620	E
278	A	0.614	E
279	A	0.601	E
280	E	0.590	E
281	P	0.577	E
282	K	0.579	E
283	E	0.575	E
284	T	0.507	E
285	T	0.441	.
286	N	0.382	.
287	I	0.310	.

[truncated: 10 more sheets: BepiPred 1.0, ABCpred, BcePred,  Ellipro (non-linear B), MHC I Pig, MHC I Pig list, MHC II Human, MHC II Mouse, NetChop, PCPS]
