# Supplementary material for: First Data on Ornithodoros moubata Aquaporins: Structural, Phylogenetic and Immunogenic Characterisation as Vaccine Targets
Source: Pathogens. 2022 Jun 16;11(6):694. doi: 10.3390/pathogens11060694 (PMC9227307; doi:10.3390/pathogens11060694)
Supplement: Supplementary file 1 [file pathogens-11-00694-s001.zip › Table S5.xlsx]

## Sheet: Summary
Table S5: Structural, physicochemical and epitope predictions for Om20812
Position	O-glycosilation	Sequence	TMHMM	Emini (accesibility)	BepiPred 2.0 (surface)	Chou & Fasman (turns)	Karplus & Scoultz (flexibility)	Parker (hydrophilicity)	Kolaskar & Tongaonkar	BepiPred 2.0	BepiPred 1.0	ABCpred	BcePred	Ellipro	MHC I IEDB Pig	MHC II IEDB Human	MHC II IEDB Mouse	NetChop	PCPS	CEG
1		M	i		E					.	.	.	.	.		T		S	S
2		K	i		E					.	.	.	.	.		T		.
3		I	i	E	E					.	.	.	.	.	T	T		S
4		Q	i	E	E	.	E	.	.	.	.	.	.	.	T	T		.
5		S	i	.	E	.	E	.	.	.	.	.	.	B	T	T		.	S
6		T	i	E	E	.	E	.	B	.	.	.	.	B	T	T		.	S
7		F	i	E	.	.	E	.	.	.	.	.	.	B	T	T		S
8		V	i	.	.	.	E	.	.	.	.	.	.	B	T	T		S	S
9		R	i	.	.	.	E	.	B	.	.	.	.	B	T	T		.	S
10		E	i	.	.	.	E	.	.	.	.	.	.	B	T	T		.	S
11		L	M	.	.	.	E	.	.	.	.	.	B	B	T	T		S
12		I	M	.	.	.	.	.	.	.	.	.	B	B	T	T		.
13		N	M	.	.	.	.	.	.	.	.	.	.	B	T	T		.	S
14		E	M	.	.	.	E	.	.	.	.	.	.	.	T	T		.	S
15		F	M	E	.	.	E	.	.	.	.	.	.	.	T	T		S
16		L	M	.	.	.	E	.	.	.	.	.	.	B	T	T		.
17		G	M	.	.	.	E	.	.	.	.	.	.	.	T	T		.	S
18		T	M	.	.	.	E	.	.	.	.	.	.	.	T	T		.	S
19		F	M	.	.	.	.	.	B	.	.	.	.	.	T	T		S
20		T	M	.	.	.	.	.	B	.	.	.	.	.	T	T		.
21		L	M	.	.	.	.	.	B	.	.	.	B	.	T	T		S	S
22		I	M	.	.	.	.	.	B	.	.	.	B	.	T	T		S	S
23		V	M	.	.	.	.	.	B	.	.	.	.	.	T	T	T	S	S
24		F	M	.	.	.	.	.	.	.	.	.	B	.	T	T	T	.
25		G	M	.	.	.	E	.	B	.	.	.	B	.	T	T	T	.	S
26		D	M	.	.	.	E	.	B	.	.	.	.	.	T	T	T	.	S
27		S	M	.	.	.	E	E	.	.	.	.	.	.	T	T	T	.
28		V	M	.	.	.	.	.	.	.	.	B	.	.	T	T	T	.
29		M	M	.	.	.	.	.	B	.	.	B	.	.	T	T	T	.
30		A	M	.	.	.	.	.	B	.	.	B	.	.	T	T	T	S	S
31		I	M	.	.	.	.	.	B	.	.	B	.	B	T	T	T	S	S
32		I	M	.	.	.	.	.	.	.	.	B	.	B	T	T	T	.
33		T	M	.	.	.	.	.	.	.	.	B	.	.		T	T	.
34		A	o	E	E	.	E	E	.	B	.	B	.	B		T	T	.
35		G	o	.	E	.	E	E	.	B	.	B	.	B	T		T	.	S
36		R	o	E	E	.	E	E	.	B	B	B	B	B	T		T	S
37		Q	o	E	E	E	E	E	.	B	B	B	B	B	T		T	.
38		E	o	.	E	E	E	E	.	B	B	B	B	B	T			.
39		H	o	E	E	E	E	E	.	B	B	B	B	B	T			.
40		N	o	.	.	.	E	E	.	B	B	B	.	B	T			.
41		A	o	.	.	.	.	E	.	B	B	B	.	B	T			.
42		G	o	.	.	E	.	.	.	.	B	B	.	.	T			.
43		I	M	.	.	E	.	.	.	.	.	B	.	B	T			S
44		I	M	.	.	.	.	.	.	.	B	B	.	B	T			.
45		G	M	.	.	E	E	.	.	.	.	B	.	.	T			.
46		P	M	.	.	E	E	.	.	.	B	B	.	.	T			.	S
47		V	M	.	E	E	E	.	.	.	B	B	.	.	T			.
48		G	M	.	.	E	E	E	.	.	B	B	.	.	T			.
49		W	M	.	.	E	E	E	.	.	B	B	.	.	T			S	S
50		G	M	.	.	.	E	.	.	.	.	B	.	.	T			.
51		T	M	.	E	.	E	.	.	.	.	B	.	.	T			.	S
52		A	M	.	.	.	.	.	.	.	.	B	.	.	T			.
53		I	M	.	.	.	.	.	B	.	.	B	.	.	T			S
54		F	M	.	.	.	.	.	B	.	.	B	.	.				S
55		C	M	.	.	.	.	.	B	.	.	B	.	.				.
56		A	M	.	.	.	.	.	B	.	.	B	.	.			T	.	S
57		V	M	.	.	.	.	.	B	.	.	B	.	.			T	.
58		T	M	.	.	.	.	E	B	.	.	B	.	B	T		T	.
59		V	M	.	.	E	E	E	B	.	.	B	.	.	T		T	S
60		S	M	.	.	E	E	E	B	.	.	B	B	.	T		T	.	S
61		G	M	.	.	E	E	E	B	.	.	B	.	B	T		T	.	S
62		G	M	.	.	E	E	E	B	.	B	B	.	.	T		T	.
63		V	M	.	.	E	E	E	.	.	.	B	.	.	T		T	S
64		S	M	.	.	E	.	E	.	.	B	B	.	.	T		T	.
65		A	M	.	.	E	.	.	B	.	B	B	.	.	T		T	S	S
66		H	i	E	.	.	.	.	B	.	B	B	.	.	T		T	.
67		L	i	E	.	E	.	E	.	.	.	B	.	.	T		T	S
68		N	i	.	.	.	E	.	B	.	.	B	.	.	T		T	.
69		P	i	.	.	.	E	.	B	.	.	B	.	.	T		T	.	S
70		A	i	.	.	.	E	.	B	.	.	.	.	.	T		T	.
71		V	i	.	.	.	.	.	B	.	.	.	.	.	T	T	T	.
72		T	i	.	.	.	.	.	B	.	.	.	.	.	T	T	T	.
73		L	i	.	.	.	.	.	B	.	.	.	.	.	T	T	T	S	S
74		A	i	.	.	.	.	.	B	.	.	.	.	.	T	T	T	S
75		L	i	.	.	.	.	.	B	.	.	.	.	.	T	T	T	S	S
76		A	i	.	.	.	.	.	B	.	.	.	.	B	T	T	T	S
77		S	i	.	.	.	.	E	.	.	.	.	.	B	T	T	T	.	S
78		V	i	E	.	.	E	.	B	.	.	.	.	B	T	T	T	S
79		K	i	E	E	.	E	E	B	.	.	.	.	B	T	T	T	S
80		K	i	E	E	.	E	.	.	B	.	.	.	B	T	T	T	S	S
81		F	i	E	.	.	E	.	B	B	.	.	B	B	T	T	T	.
82		P	i	E	E	.	E	.	.	B	.	.	B	B	T	T	T	.
83		I	i	E	.	.	E	.	B	B	.	.	B	B	T	T	T	.	S
84		K	i	E	E	.	E	.	B	B	.	.	B	B	T	T	T	S
85		K	i	.	.	.	E	.	.	.	.	.	B	B	T	T	T	.	S
86		V	M	E	.	.	E	.	B	.	.	.	B	B	T	T	T	.
87		P	M	.	.	.	.	.	B	.	.	.	B	B	T	T	T	.
88		L	M	.	.	.	.	.	.	.	.	.	B	B	T	T	T	S
89		F	M	.	.	.	.	.	B	.	.	.	.	.	T	T	T	S
90		F	M	.	.	.	.	.	B	.	.	.	.	.	T	T	T	.	S
91		V	M	.	.	.	.	.	B	.	.	.	.	B	T	T	T	.
92		A	M	.	.	.	.	.	B	.	.	.	.	.	T	T	T	S	S
93		Q	M	.	.	.	.	.	B	.	.	.	.	.	T	T	T	.	S
94		Y	M	E	.	.	.	E	B	.	.	.	.	.	T	T	T	S
95		T	M	E	.	.	E	E	.	.	.	.	.	.	T	T	T	.
96		G	M	.	.	.	E	.	.	.	.	.	.	.	T	T	T	.	S
97		A	M	.	.	.	.	.	.	.	.	.	.	.	T	T	T	.	S
98		F	M	.	.	.	.	.	.	.	.	.	.	.	T	T	T	.
99		F	M	.	.	.	.	.	.	.	.	.	.	B	T	T	T	.
100		A	M	.	.	.	.	.	B	.	.	.	.	.	T	T	T	.	S
101		A	M	.	.	.	.	.	B	.	.	.	.	.	T	T	T	.	S
102		A	M	.	.	.	.	.	B	.	.	.	.	.	T	T	T	.
103		V	M	.	.	.	.	.	B	.	.	.	.	.	T	T	T	.
104		V	M	.	.	.	.	.	B	.	.	.	.	.	T	T	T	S	S
105		F	M	.	.	.	.	.	B	.	.	.	.	B	T	T	T	S	S
106		A	M	.	.	.	.	.	B	.	.	.	.	B	T	T	T	.
107		I	M	E	.	.	.	.	B	.	.	.	.	B	T	T	T	S	S
108		Y	M	.	.	.	.	.	.	.	.	.	.	.	T	T	T	S
109		R	o	.	E	.	E	.	.	.	.	.	.	B	T	T	T	.
110		D	o	E	E	.	E	.	.	B	.	.	.	B	T	T	T	.	S
111		A	o	E	E	.	.	E	.	B	.	.	.	B	T		T	.
112		I	o	.	.	.	.	E	.	B	.	.	.	B	T		T	.
113		D	o	.	E	.	.	E	.	B	B	.	.	B	T		T	.
114		A	o	.	E	.	.	E	B	B	B	.	.	B	T		T	.	S
115		V	o	E	.	E	E	E	.	B	B	.	.	B	T		T	S
116		D	o	.	E	E	E	E	B	B	B	.	B	B	T			.	S
117		S	o	.	E	E	E	E	B	B	B	.	.	B	T			.	S
118		G	o	E	E	E	E	E	B	B	.	.	.	B	T			.
119		V	o	.	.	E	E	E	B	B	.	.	B	B	T		T	S
120		R	o	.	E	.	E	.	B	B	B	.	B	B	T		T	.
121		S	o	.	.	E	E	.	B	B	.	.	B	B	T		T	.	S
122		V	o	.	.	E	E	.	.	B	B	.	.	.	T		T	S	S
123		L	o	.	.	E	E	E	.	B	B	.	.	B	T		T	S
124		G	o	.	.	.	E	E	.	B	B	.	.	B	T		T	.
125		P	o	.	E	E	E	E	.	B	B	.	.	B	T		T	.	S
126	O-gly	T	o	E	E	E	E	.	.	B	B	.	.	B	T		T	.
127		G	o	E	.	E	E	E	.	B	B	.	.	.	T		T	.
128	O-gly	T	o	.	E	E	E	E	.	B	B	.	.	.	T		T	.
129		A	o	.	.	.	E	.	.	.	B	.	.	.	T		T	S
130		P	o	.	.	.	.	.	.	.	B	B	.	.	T		T	.
131		I	o	.	.	.	.	.	.	.	B	B	.	.	T		T	S
132		F	o	.	.	.	.	.	B	.	B	B	.	.	T		T	S
133		A	o	.	.	.	.	.	B	.	.	B	.	.	T		T	.
134		T	o	E	.	.	.	.	.	B	B	B	.	.	T		T	.	S
135		Y	o	E	.	.	E	E	.	B	B	B	B	.	T		T	S
136		P	o	E	E	E	E	.	.	B	B	B	B	.	T		T	.
137		R	o	E	.	E	E	E	.	B	B	B	.	B	T		T	S
138		E	o	E	E	E	E	E	.	B	B	B	.	B	T		T	.
139		G	o	E	E	.	E	E	.	B	B	B	.	B	T		T	.
140		I	o	.	.	.	E	E	.	B	B	B	.	B	T		T	.
141		S	o	.	.	.	E	E	.	.	.	B	.	B	T		T	.
142		T	M	.	.	E	E	.	B	.	.	B	B	B	T		T	.	S
143		L	M	.	.	.	E	.	B	.	.	B	B	B	T		T	S
144		T	M	.	.	.	.	.	B	.	.	B	B	B	T			.
145		C	M	.	.	.	.	.	B	.	.	B	B	.	T			.	S
146		F	M	.	.	.	.	.	B	.	.	.	B	B	T			.
147		I	M	.	.	.	.	.	B	.	.	.	B	B				.	S
148		D	M	.	.	.	E	.	B	.	.	.	B	.				.	S
149		Q	M	.	.	.	E	.	B	.	.	.	.	.				.	S
150		V	M	.	.	.	.	E	.	.	.	.	.	.	T			S
151		V	M	.	.	.	E	E	B	.	.	.	.	.	T			.
152		A	M	.	.	.	.	E	B	.	.	.	.	.	T			.
153		T	M	.	.	.	E	.	B	.	.	.	.	.	T			.	S
154		G	M	.	.	.	.	.	B	.	.	.	.	.	T			.
155		C	M	.	.	.	.	.	B	.	.	.	.	.	T			.
156		L	M	.	.	.	.	.	B	.	.	.	B	.	T			S
157		V	M	.	.	.	.	.	B	.	.	.	.	.	T			.	S
158		L	M	.	.	.	.	.	.	.	.	.	.	.	T			S	S
159		T	M	.	.	.	.	.	.	.	.	.	.	.				.
160		A	M	.	.	.	.	.	B	.	.	B	.	.				.	S
161		E	M	.	.	.	.	.	.	.	.	B	.	.	T			.
162		A	M	E	.	.	.	E	.	.	B	B	.	B	T			.	S
163		I	M	E	.	.	E	E	.	.	B	B	.	.	T			.
164		T	M	E	.	.	E	E	.	.	B	B	B	.	T			.
165		D	i	E	.	E	E	E	.	.	B	B	B	B	T			.
166		P	i	E	E	E	E	E	.	B	B	B	.	B	T			.	S
167		R	i	E	E	.	E	E	.	B	B	B	B	B	T			S
168		N	i	.	E	E	E	E	.	B	B	B	.	B	T			.
169		F	i	.	E	E	E	.	.	B	B	B	.	B	T			.
170		G	i	.	E	E	E	.	.	B	B	B	.	B	T			.
171		G	M	.	E	.	E	E	.	B	B	B	.	B	T		T	.	S
172		L	M	E	E	E	E	.	.	B	B	B	.	B	T		T	.
173		P	M	E	E	E	E	.	.	B	B	B	.	B	T		T	.
174		K	M	E	E	E	E	.	B	B	B	B	.	B	T		T	S
175		P	M	E	.	E	E	.	B	B	B	B	B	B	T		T	.
176		F	M	E	.	E	E	.	B	.	.	.	B	B	T	T	T	.
177		Y	M	.	.	E	.	.	B	.	.	.	.	B	T	T	T	S	S
178		P	M	.	.	.	.	.	B	.	.	.	.	.	T	T	T	.
179		L	M	.	E	.	.	.	B	.	.	.	.	B	T	T	T	S
180		A	M	.	.	.	.	.	.	.	.	.	.	.	T	T	T	S	S
181		L	M	.	.	.	.	.	B	.	.	.	.	.	T	T	T	S	S
182		G	M	.	.	.	.	.	B	.	.	.	.	.	T	T	T	.	S
183		L	M	.	E	.	.	.	B	.	.	.	.	B	T	T	T	S
184		M	M	.	.	.	.	.	B	.	.	.	.	.	T	T	T	.	S
185		I	M	.	.	.	.	.	.	.	.	.	.	.	T	T	T	S	S
186		S	M	.	.	.	.	.	.	.	.	.	.	.	T	T		.
187		A	M	.	.	.	.	.	.	.	.	.	.	.	T	T		.	S
188		E	M	.	.	.	.	.	.	.	.	.	.	.	T	T		.
189		I	M	.	.	.	.	.	.	.	.	.	.	.	T	T		.
190		F	M	.	.	.	.	.	.	.	.	.	.	B	T	T	T	S
191		A	M	.	.	.	.	.	.	.	.	.	.	B	T	T	T	.	S
192		F	M	.	.	.	.	.	.	.	.	.	.	.	T	T	T	S
193		S	M	.	.	E	.	.	B	.	.	.	.	.	T	T	T	.	S
194		Y	o	.	.	E	.	.	.	.	.	.	.	B	T	T	T	S
195		N	o	.	.	E	.	.	.	.	.	.	.	.		T	T	.	S
196		C	o	.	.	E	.	E	.	.	.	.	.	.		T	T	.
197		M	o	.	.	E	.	.	B	.	.	.	.	.		T	T	.
198		A	o	.	.	E	.	.	.	.	.	.	.	.	T	T	T	.	S
199		P	o	E	.	E	.	.	B	.	.	.	.	.	T	T	T	.
200		L	o	E	.	E	E	.	.	.	B	.	.	.	T	T	T	S
201		N	o	E	.	E	E	E	.	.	B	.		.	T		T	.	S
202		P	o	E	.	.	E	E	.	.	B	B	B	.	T		T	.
203		A	o	E	.	E	E	.	.	.	B	B		.	T		T	.
204		R	o	E	.	E	E	E	.	.	B	B		.	T		T	.
205		D	o	E	.	.	E	E	.	.	B	B		.	T			.
206		L	o	E	.	E	E	E	.	.	B	B	B	.	T			S
207		G	o	E	.	E	E	.	.	.	B	B		.	T			.	S
208		P	o	.	.	E	E	.	B	.	.	B		.	T			.
209		R	o	E	.	.	E	.	B	.	.	B		.	T			.
210		V	o	E	.	.	.	.	.	.	.	B	.	.	T			.
211		F	o	.	.	.	.	.	B	.	.	B	.	.	T			S
212		T	o	.	.	.	.	.	B	.	.	B	.	.	T			.	S
213		A	o	.	.	.	.	.	B	.	.	B	.	B	T			S
214		I	o	.	.	.	.	.	.	.	.	B	.	B	T			S
215		A	o	.	.	.	.	.	.	.	.	B	.	B	T			S	S
216		G	o	.	.	.	.	.	.	.	.	B	.	B	T			.
217		W	o	.	.	.	.	.	.	.	.	B	.	.	T			S
218		G	o	.	E	.	.	.	.	B	.	B	.	B	T			.	S
219		M	o	.	E	.	.	.	.	B	.	B	.	B	T			.
220		E	o	.	E	.	.	.	.	B	.	B	.	B	T			.
221		V	o	.	.	.	.	.	.	B	.	B	.	.	T			S
222		F	o	.	.	.	.	.	.	B	.	B	.	B	T			.
223		S	o	.	E	.	.	.	B	B	.	B	.	B	T			.	S
224		V	o	E	E	.	E	.	.	B	.	B	B	B	T			.
225		R	o	E	E	.	E	.	.	B	.	B	B	B	T			.	S
226		D	o	E	E	.	E	.	B	B	.	B	B	B	T	T	T	.
227		Y	o	E	.	.	.	.	.	B	.	B	.	B	T	T	T	.
228		V	o	.	.	.	.	.	.	.	.	B	B	B	T	T	T	.	S
229		W	o	.	.	.	.	.	B	.	.	B	B	.	T	T	T	S
230		M	M	.	.	.	.	.	B	.	.	B	B	.	T	T	T	.	S
231		F	M	.	.	.	.	.	B	.	.	B	.	B	T	T	T	.
232		V	M	.	.	.	.	.	B	.	.	B	.	.	T	T	T	.	S
233		P	M	.	.	.	.	.	B	.	.	B	.	.	T	T	T	.
234		I	M	.	.	.	.	.	.	.	.	B	.	.	T	T	T	S
235		F	M	.	.	.	.	.	B	.	.	B	.	.	T	T	T	S
236		A	M	.	.	.	.	.	B	.	.	B	.	.	T	T	T	.	S
237		P	M	.	.	.	.	.	B	.	.	B	.	.	T	T	T	.
238		H	M	.	.	.	.	.	B	.	.	B	.	.	T	T	T	.
239		V	M	.	.	E	.	E	B	.	.	B	.	.	T	T	T	S
240		G	M	.	.	E	E	.	B	.	.	B	B	.	T	T	T	.	S
241		G	M	.	.	E	E	.	B	.	.	B	B	.	T	T	T	.
242		V	M	.	.	.	.	.	.	.	.	B	.	.	T	T	T	.
243		L	M	.	.	E	.	.	.	.	.	B	.	B	T	T	T	S
244		G	M	.	.	.	.	.	.	.	.	B	.	.	T	T	T	.	S
245		A	M	.	.	.	.	.	B	.	.	B	.	.	T	T	T	.
246		W	M	.	E	.	.	.	.	.	.	B	.	B	T			.
247		T	M	E	.	.	.	.	.	.	.	B	.	B	T			.	S
248		Y	M	.	.	.	.	.	B	.	.	B	.	B	T			S
249		K	M	.	E	.	.	.	B	.	.	B	B	B	T			S	S
250		V	i	.	.	.	.	E	B	.	.	B	B	B				S
251		C	i	.	.	.	.	E	B	.	.	B	B	B				.	S
252		V	i	.	.	.	E	.	B	.	.	B	B	B				S
253		E	i	.	E	.	E	E	B	.	.	B	B	B				.	S
254		D	i	E	E	E	E	E	.	B	B	B	D	B				.
255		N	i	.	E	E	E	.	.	B	B	B	B	B	T			.
256		W	i	.	.	E	E	E	.	B	B	B	B	B	T			.
257		P	i	E	E	E	E	E	.	B	B	B	B	.	T			.	S
258		E	i	E	E	E	E	E	.	B	B	.	B	.	T			.
259		E	i	E	E	E	E	E	.	B	B	.	B	.	T			.
260		E	i	E	E	.	E	E	.	B	B	.	B	.	T			.
261		P	i	E	E	.	E	E	.	B	B	.	.	.	T			.
262		T	i	.	E	.	E	.	B	B	B	.	.	.	T			.
263		V	i	.	E	.	.	.	B	B	B	.	B	.	T			.
264		I	i	.	E	.	.	.	B	B	.	.	B	.	T			S
265		L	i	.	E	.	.	.	B	B	.	.	B	.	T			S	S
266		P	i	.	E	.	.	.	B	B	.	.	B	.	T			.	S
267		V	i	.	E	.	E	.	B	B	.	.	B	.	T			S
268		S	i	.	E	E	E	E	.	B	B	.	B	.	T			.	S
269		T	i	E	E	E	E	E	.	B	B	.	B	.	T			.	S
270		S	i	E	E	E	E	E	.	B	B	.	B	.	T			.
271		K	i	E	E	E	E	E	.	B	B	.	B	.	T			S
272		N	i	E	E	E	E	E	.	B	B	.	B	.	T			.
273		S	i	E	E	E	E	E	.	B	B	.	B	.	T			.
274		E	i	E	E	E	E	E	.	B	B	.	B	.	T			.
275		L	i	E	E	E	E	E	.	B	B	.	.	.	T			S	S
276		G	i	E	E	E	E	E	.	.	B	.	.	.	T			.
277		P	i	.	E	.		.	.	.	B	.	.	.	T			.
278		T	i		E					.	.	.	.	.	T			.
279		W	i		.					.	.	.	.	.	T			S
280		L	i		E						.	.	.	.	.			.

## Sheet: Figure Om20812
		Position	1									10										20										30										40
Structure and exposure	Structure and exposure	Sequence	M	K	I	Q	S	T	F	V	R	E	L	I	N	E	F	L	G	T	F	T	L	I	V	F	G	D	S	V	M	A	I	I	T	A	G	R	Q	E	H	N	A	G	I	I	G	P	V
		TMHMM	i	i	i	i	i	i	i	i	i	i	M	M	M	M	M	M	M	M	M	M	M	M	M	M	M	M	M	M	M	M	M	M	M	o	o	o	o	o	o	o	o	o	M	M	M	M	M
		Emini (accesibility)			E	E	.	E	E	.	.	.	.	.	.	.	E	.	.	.	.	.	.	.	.	.	.	.	.	.	.	.	.	.	.	E	.	E	E	.	E	.	.	.	.	.	.	.	.
		BepiPred 2.0 (surface)	E	E	E	E	E	E	.	.	.	.	.	.	.	.	.	.	.	.	.	.	.	.	.	.	.	.	.	.	.	.	.	.	.	E	E	E	E	E	E	.	.	.	.	.	.	.	E
		Chou & Fasman (turns)				.	.	.	.	.	.	.	.	.	.	.	.	.	.	.	.	.	.	.	.	.	.	.	.	.	.	.	.	.	.	.	.	.	E	E	E	.	.	E	E	.	E	E	E
		Karplus & Scoultz (flexibility)				E	E	E	E	E	E	E	E	.	.	E	E	E	E	E	.	.	.	.	.	.	E	E	E	.	.	.	.	.	.	E	E	E	E	E	E	E	.	.	.	.	E	E	E
		Parker (hydrophilicity)				.	.	.	.	.	.	.	.	.	.	.	.	.	.	.	.	.	.	.	.	.	.	.	E	.	.	.	.	.	.	E	E	E	E	E	E	E	E	.	.	.	.	.	.
B cell epitopes	Linear and discontinuous B cell epitopes	Kolaskar & Tongaonkar				.	.	B	.	.	B	.	.	.	.	.	.	.	.	.	B	B	B	B	B	.	B	B	.	.	B	B	B	.	.	.	.	.	.	.	.	.	.	.	.	.	.	.	.
		BepiPred 2.0	.	.	.	.	.	.	.	.	.	.	.	.	.	.	.	.	.	.	.	.	.	.	.	.	.	.	.	.	.	.	.	.	.	B	B	B	B	B	B	B	B	.	.	.	.	.	.
		BepiPred 1.0	.	.	.	.	.	.	.	.	.	.	.	.	.	.	.	.	.	.	.	.	.	.	.	.	.	.	.	.	.	.	.	.	.	.	.	B	B	B	B	B	B	B	.	B	.	B	B
		ABCpred	.	.	.	.	.	.	.	.	.	.	.	.	.	.	.	.	.	.	.	.	.	.	.	.	.	.	.	B	B	B	B	B	B	B	B	B	B	B	B	B	B	B	B	B	B	B	B
		BcePred	.	.	.	.	.	.	.	.	.	.	B	B	.	.	.	.	.	.	.	.	B	B	.	B	B	.	.	.	.	.	.	.	.	.	.	B	B	B	B	.	.	.	.	.	.	.	.
		ElliPro (discontinuous)	.	.	.	.	B	B	B	B	B	B	B	B	B	.	.	B	.	.	.	.	.	.	.	.	.	.	.	.	.	.	B	B	.	B	B	B	B	B	B	B	B	.	B	B	.	.	.
T cell epitopes	T cell epitopes	MHC I IEDB Pig			T	T	T	T	T	T	T	T	T	T	T	T	T	T	T	T	T	T	T	T	T	T	T	T	T	T	T	T	T	T			T	T	T	T	T	T	T	T	T	T	T	T	T
		MHC II IEDB Human	T	T	T	T	T	T	T	T	T	T	T	T	T	T	T	T	T	T	T	T	T	T	T	T	T	T	T	T	T	T	T	T	T	T
		MHC II IEDB Mouse																							T	T	T	T	T	T	T	T	T	T	T	T	T	T	T
Proteasomal processing	Proteasomal processing	NetChop	S	.	S	.	.	.	S	S	.	.	S	.	.	.	S	.	.	.	S	.	S	S	S	.	.	.	.	.	.	S	S	.	.	.	.	S	.	.	.	.	.	.	S	.	.	.	.
		PCPS	S				S	S		S	S	S			S	S			S	S			S	S	S		S	S				S	S				S											S
		Antigenic peptides																																		Om20812_A
						Key Om20812:
						o (outside), extracellular; M, transmembrane; i, intracellular
						E, exposed on surface, predicted turns, hydrophilic
						F, predicted turns and flexibility
						B, B-cell epitope
						T, T-cell epitope
						S, predicted proteasome cut site
[truncated: 233 more columns]

## Sheet: TMHMM
TMHMM result
# Om20812 Length: 280
# Om20812 Number of predicted TMHs: 6
# Om20812 Exp number of AAs in TMHs: 132.34245
# Om20812 Exp number, first 60 AAs: 38.14554
# Om20812 Total prob of N-in: 0.99021
# Om20812 POSSIBLE N-term signal sequence
Om20812	TMHMM2.0	inside	1	12
Om20812	TMHMM2.0	TMhelix	13	35
Om20812	TMHMM2.0	outside	36	44
Om20812	TMHMM2.0	TMhelix	45	67
Om20812	TMHMM2.0	inside	68	87
Om20812	TMHMM2.0	TMhelix	88	110
Om20812	TMHMM2.0	outside	111	141
Om20812	TMHMM2.0	TMhelix	142	164
Om20812	TMHMM2.0	inside	165	170
Om20812	TMHMM2.0	TMhelix	171	193
Om20812	TMHMM2.0	outside	194	229
Om20812	TMHMM2.0	TMhelix	230	249
Om20812	TMHMM2.0	inside	250	280

## Sheet: Emini (accesibility)
Position	Residue	Start	End	Peptide	Score
3	I	1	6	MKIQST	1.71
4	Q	2	7	KIQSTF	1497
5	S	3	8	IQSTFV	0.555
6	T	4	9	QSTFVR	1552
7	F	5	10	STFVRE	1552
8	V	6	11	TFVREL	0.955
9	R	7	12	FVRELI	0.464
10	E	8	13	VRELIN	0.862
11	L	9	14	RELINE	2.01
12	I	10	15	ELINEF	0.889
13	N	11	16	LINEFL	0.423
14	E	12	17	INEFLG	0.508
15	F	13	18	NEFLGT	1046
16	L	14	19	EFLGTF	0.563
17	G	15	20	FLGTFT	0.469
18	T	16	21	LGTFTL	0.447
19	F	17	22	GTFTLI	0.38
20	T	18	23	TFTLIV	0.285
21	L	19	24	FTLIVF	0.171
22	I	20	25	TLIVFG	0.195
23	V	21	26	LIVFGD	0.226
24	F	22	27	IVFGDS	0.367
25	G	23	28	VFGDSV	0.389
26	D	24	29	FGDSVM	0.519
27	S	25	30	GDSVMA	0.605
28	V	26	31	DSVMAI	0.428
29	M	27	32	SVMAII	0.18
30	A	28	33	VMAIIT	0.194
31	I	29	34	MAIITA	0.264
32	I	30	35	AIITAG	0.264
33	T	31	36	IITAGR	0.511
34	A	32	37	ITAGRQ	1263
35	G	33	38	TAGRQE	3.12
36	R	34	39	AGRQEH	2942
37	Q	35	40	GRQEHN	4683
38	E	36	41	RQEHNA	4.78
39	H	37	42	QEHNAG	2415
40	N	38	43	EHNAGI	0.978
41	A	39	44	HNAGII	0.396
42	G	40	45	NAGIIG	0.288
43	I	41	46	AGIIGP	0.277
44	I	42	47	GIIGPV	0.203
45	G	43	48	IIGPVG	0.203
46	P	44	49	IGPVGW	0.305
47	V	45	50	GPVGWG	0.431
48	G	46	51	PVGWGT	0.628
49	W	47	52	VGWGTA	0.41
50	G	48	53	GWGTAI	0.387
51	T	49	54	WGTAIF	0.339
52	A	50	55	GTAIFC	0.173
53	I	51	56	TAIFCA	0.176
54	F	52	57	AIFCAV	0.091
55	C	53	58	IFCAVT	0.13
56	A	54	59	FCAVTV	0.137
57	V	55	60	CAVTVS	0.212
58	T	56	61	AVTVSG	0.392
59	V	57	62	VTVSGG	0.384
60	S	58	63	TVSGGV	0.384
61	G	59	64	VSGGVS	0.357
62	G	60	65	SGGVSA	0.485
63	V	61	66	GGVSAH	0.493
64	S	62	67	GVSAHL	0.411
65	A	63	68	VSAHLN	0.667
66	H	64	69	SAHLNP	1391
67	L	65	70	AHLNPA	1048
68	N	66	71	HLNPAV	0.77
69	P	67	72	LNPAVT	0.817
70	A	68	73	NPAVTL	0.817
71	V	69	74	PAVTLA	0.513
72	T	70	75	AVTLAL	0.274
73	L	71	76	VTLALA	0.274
74	A	72	77	TLALAS	0.494
75	L	73	78	LALASV	0.254
76	A	74	79	ALASVK	0.616
77	S	75	80	LASVKK	1.22
78	V	76	81	ASVKKF	1281
79	K	77	82	SVKKFP	1961
80	K	78	83	VKKFPI	1026
81	F	79	84	KKFPIK	2763
82	P	80	85	KFPIKK	2763
83	I	81	86	FPIKKV	1026
84	K	82	87	PIKKVP	1831
85	K	83	88	IKKVPL	0.977
86	V	84	89	KKVPLF	1207
87	P	85	90	KVPLFF	0.522
88	L	86	91	VPLFFV	0.194
89	F	87	92	PLFFVA	0.264
90	F	88	93	LFFVAQ	0.296
91	V	89	94	FFVAQY	0.562
92	A	90	95	FVAQYT	0.936
93	Q	91	96	VAQYTG	1.07
94	Y	92	97	AQYTGA	1456
95	T	93	98	QYTGAF	1248
96	G	94	99	YTGAFF	0.624
97	A	95	100	TGAFFA	0.402
98	F	96	101	GAFFAA	0.282
99	F	97	102	AFFAAA	0.287
100	A	98	103	FFAAAV	0.211
101	A	99	104	FAAAVV	0.181
102	A	100	105	AAAVVF	0.181
103	V	101	106	AAVVFA	0.181
104	V	102	107	AVVFAI	0.126
105	F	103	108	VVFAIY	0.195
106	A	104	109	VFAIYR	0.514
107	I	105	110	FAIYRD	1157
108	Y	106	111	AIYRDA	1.35
109	R	107	112	IYRDAI	0.936
110	D	108	113	YRDAID	2231
111	A	109	114	RDAIDA	1438
112	I	110	115	DAIDAV	0.545
113	D	111	116	AIDAVD	0.545
114	A	112	117	IDAVDS	0.723
115	V	113	118	DAVDSG	1021
116	D	114	119	AVDSGV	0.454
117	S	115	120	VDSGVR	0.88
118	G	116	121	DSGVRS	1588
119	V	117	122	SGVRSV	0.706
120	R	118	123	GVRSVL	0.434
121	S	119	124	VRSVLG	0.434
122	V	120	125	RSVLGP	0.905
123	L	121	126	SVLGPT	0.667
124	G	122	127	VLGPTG	0.492
125	P	123	128	LGPTGT	0.957
126	T	124	129	GPTGTA	1173
127	G	125	130	PTGTAP	1833
128	T	126	131	TGTAPI	0.831
129	A	127	132	GTAPIF	0.498
130	P	128	133	TAPIFA	0.509
131	I	129	134	APIFAT	0.509
132	F	130	135	PIFATY	0.789
133	A	131	136	IFATYP	0.789
134	T	132	137	FATYPR	2205
135	Y	133	138	ATYPRE	4411
136	P	134	139	TYPREG	4321
137	R	135	140	YPREGI	2099
138	E	136	141	PREGIS	1795
139	G	137	142	REGIST	1675
140	I	138	143	EGISTL	0.705
141	S	139	144	GISTLT	0.588
142	T	140	145	ISTLTC	0.318
143	L	141	146	STLTCF	0.393
144	T	142	147	TLTCFI	0.206
145	C	143	148	LTCFID	0.238
146	F	144	149	TCFIDQ	0.5
147	I	145	150	CFIDQV	0.257
148	D	146	151	FIDQVV	0.356
149	Q	147	152	IDQVVA	0.415
150	V	148	153	DQVVAT	0.855
151	V	149	154	QVVATG	0.507
152	A	150	155	VVATGC	0.157
153	T	151	156	VATGCL	0.174
154	G	152	157	ATGCLV	0.174
155	C	153	158	TGCLVL	0.142
156	L	154	159	GCLVLT	0.142
157	V	155	160	CLVLTA	0.145
158	L	156	161	LVLTAE	0.469
159	T	157	162	VLTAEA	0.575
160	A	158	163	LTAEAI	0.543
161	E	159	164	TAEAIT	0.95
162	A	160	165	AEAITD	1099
163	I	161	166	EAITDP	1682
164	T	162	167	AITDPR	1903
165	D	163	168	ITDPRN	3029
166	P	164	169	TDPRNF	3741
167	R	165	170	DPRNFG	2566
168	N	166	171	PRNFGG	1.52
169	F	167	172	RNFGGL	0.811
170	G	168	173	NFGGLP	0.64
171	G	169	174	FGGLPK	0.796
172	L	170	175	GGLPKP	1422
173	P	171	176	GLPKPF	1244
174	K	172	177	LPKPFY	1969
175	P	173	178	PKPFYP	3693
176	F	174	179	KPFYPL	1969
177	Y	175	180	PFYPLA	0.995
178	P	176	181	FYPLAL	0.531
179	L	177	182	YPLALG	0.606
180	A	178	183	PLALGL	0.319
181	L	179	184	LALGLM	0.204
182	G	180	185	ALGLMI	0.174
183	L	181	186	LGLMIS	0.23
184	M	182	187	GLMISA	0.282
185	I	183	188	LMISAE	0.494
186	S	184	189	MISAEI	0.42
187	A	185	190	ISAEIF	0.367
188	E	186	191	SAEIFA	0.529
189	I	187	192	AEIFAF	0.342
190	F	188	193	EIFAFS	0.454
191	A	189	194	IFAFSY	0.41
192	F	190	195	FAFSYN	0.942
193	S	191	196	AFSYNC	0.583
194	Y	192	197	FSYNCM	0.571
195	N	193	198	SYNCMA	0.666
196	C	194	199	YNCMAP	0.769
197	M	195	200	NCMAPL	0.405
198	A	196	201	CMAPLN	0.405
199	P	197	202	MAPLNP	1167
200	L	198	203	APLNPA	1191
201	N	199	204	PLNPAR	2309
202	P	200	205	LNPARD	2494
203	A	201	206	NPARDL	2494
204	R	202	207	PARDLG	1535
205	D	203	208	ARDLGP	1535
206	L	204	209	RDLGPR	2976
207	G	205	210	DLGPRV	1128
208	P	206	211	LGPRVF	0.585
209	R	207	212	GPRVFT	1023
210	V	208	213	PRVFTA	1045
211	F	209	214	RVFTAI	0.474
212	T	210	215	VFTAIA	0.244
213	A	211	216	FTAIAG	0.326
214	I	212	217	TAIAGW	0.395
215	A	213	218	AIAGWG	0.271
216	G	214	219	IAGWGM	0.266
217	W	215	220	AGWGME	0.656
218	G	216	221	GWGMEV	0.482
219	M	217	222	WGMEVF	0.422
220	E	218	223	GMEVFS	0.538
221	V	219	224	MEVFSV	0.403
222	F	220	225	EVFSVR	0.798
223	S	221	226	VFSVRD	0.77
224	V	222	227	FSVRDY	1625
225	R	223	228	SVRDYV	1393
226	D	224	229	VRDYVW	1093
227	Y	225	230	RDYVWM	1457
228	V	226	231	DYVWMF	0.644
229	W	227	232	YVWMFV	0.286
230	M	228	233	VWMFVP	0.283
231	F	229	234	WMFVPI	0.267
232	V	230	235	MFVPIF	0.22
233	P	231	236	FVPIFA	0.224
234	I	232	237	VPIFAP	0.401
235	F	233	238	PIFAPH	0.734
236	A	234	239	IFAPHV	0.352
237	P	235	240	FAPHVG	0.498
238	H	236	241	APHVGG	0.569
239	V	237	242	PHVGGV	0.418
240	G	238	243	HVGGVL	0.223
241	G	239	244	VGGVLG	0.162
242	V	240	245	GGVLGA	0.221
243	L	241	246	GVLGAW	0.234
244	G	242	247	VLGAWT	0.342
245	A	243	248	LGAWTY	0.722
246	W	244	249	GAWTYK	1.75
247	T	245	250	AWTYKV	1312
248	Y	246	251	WTYKVC	0.696
249	K	247	252	TYKVCV	0.492
250	V	248	253	YKVCVE	0.59
251	C	249	254	KVCVED	0.629
252	V	250	255	VCVEDN	0.506
253	E	251	256	CVEDNW	0.716
254	D	252	257	VEDNWP	2066
255	N	253	258	EDNWPE	4.82
256	W	254	259	DNWPEE	4.82
257	P	255	260	NWPEEE	4999
258	E	256	261	WPEEEP	4807
259	E	257	262	PEEEPT	6597
260	E	258	263	EEEPTV	3167
261	P	259	264	EEPTVI	1282
262	T	260	265	EPTVIL	0.61
263	V	261	266	PTVILP	0.545
264	I	262	267	TVILPV	0.262
265	L	263	268	VILPVS	0.243
266	P	264	269	ILPVST	0.472
267	V	265	270	LPVSTS	0.903
268	S	266	271	PVSTSK	2.19
269	T	267	272	VSTSKN	2277
270	S	268	273	STSKNS	4112
271	K	269	274	TSKNSE	5314
272	N	270	275	SKNSEL	3036
273	S	271	276	KNSELG	2242
274	E	272	277	NSELGP	1734
275	L	273	278	SELGPT	1556
276	G	274	279	ELGPTW	1221
277	P	275	280	LGPTWL	0.581

## Sheet: BepiPred 2.0 Surf
Entry	Position	AminoAcid	Exposed/ Buried	Relative Surface Accessilibity	Helix Probability	Sheet Probability	Coil Probability	Epitope Probability	Assignement
Om20812_MBZ3958194_	1	M	E	0.716	0.003	0.003	0.994	0.247	.
Om20812_MBZ3958194_	2	K	E	0.703	0.018	0.088	0.893	0.313444444444	.
Om20812_MBZ3958194_	3	I	E	0.296	0.018	0.088	0.893	0.373333333333	.
Om20812_MBZ3958194_	4	Q	E	0.509	0.018	0.047	0.935	0.409555555556	.
Om20812_MBZ3958194_	5	S	E	0.461	0.502	0.002	0.495	0.461444444444	.
Om20812_MBZ3958194_	6	T	E	0.578	0.858	0.002	0.139	0.468888888889	.
Om20812_MBZ3958194_	7	F	B	0.177	0.923	0.002	0.076	0.453777777778	.
Om20812_MBZ3958194_	8	V	B	0.071	0.970	0.001	0.030	0.446111111111	.
Om20812_MBZ3958194_	9	R	B	0.201	0.970	0.001	0.030	0.433111111111	.
Om20812_MBZ3958194_	10	E	B	0.259	0.988	0.000	0.012	0.416	.
Om20812_MBZ3958194_	11	L	B	0.054	0.988	0.000	0.012	0.384	.
Om20812_MBZ3958194_	12	I	B	0.096	0.988	0.000	0.012	0.366444444444	.
Om20812_MBZ3958194_	13	N	B	0.068	0.988	0.000	0.012	0.360777777778	.
Om20812_MBZ3958194_	14	E	B	0.099	0.988	0.000	0.012	0.339	.
Om20812_MBZ3958194_	15	F	B	0.116	0.988	0.000	0.012	0.320555555556	.
Om20812_MBZ3958194_	16	L	B	0.186	0.988	0.000	0.012	0.315	.
Om20812_MBZ3958194_	17	G	B	0.107	0.988	0.000	0.012	0.307	.
Om20812_MBZ3958194_	18	T	B	0.129	0.988	0.000	0.012	0.295111111111	.
Om20812_MBZ3958194_	19	F	B	0.165	0.988	0.000	0.012	0.296888888889	.
Om20812_MBZ3958194_	20	T	B	0.252	0.988	0.000	0.012	0.299333333333	.
Om20812_MBZ3958194_	21	L	B	0.127	0.988	0.000	0.012	0.286777777778	.
Om20812_MBZ3958194_	22	I	B	0.108	0.988	0.000	0.012	0.292777777778	.
Om20812_MBZ3958194_	23	V	B	0.179	0.970	0.001	0.030	0.304555555556	.
Om20812_MBZ3958194_	24	F	B	0.185	0.970	0.001	0.030	0.303888888889	.
Om20812_MBZ3958194_	25	G	B	0.118	0.970	0.001	0.030	0.311777777778	.
Om20812_MBZ3958194_	26	D	B	0.104	0.923	0.002	0.076	0.303444444444	.
Om20812_MBZ3958194_	27	S	B	0.083	0.923	0.002	0.076	0.311444444444	.
Om20812_MBZ3958194_	28	V	B	0.049	0.938	0.007	0.055	0.311333333333	.
Om20812_MBZ3958194_	29	M	B	0.058	0.938	0.007	0.055	0.328111111111	.
Om20812_MBZ3958194_	30	A	B	0.046	0.802	0.014	0.185	0.359222222222	.
Om20812_MBZ3958194_	31	I	B	0.147	0.751	0.050	0.199	0.387666666667	.
Om20812_MBZ3958194_	32	I	B	0.142	0.605	0.105	0.290	0.421444444444	.
Om20812_MBZ3958194_	33	T	B	0.267	0.278	0.093	0.628	0.468888888889	.
Om20812_MBZ3958194_	34	A	E	0.312	0.113	0.043	0.844	0.503777777778	E
Om20812_MBZ3958194_	35	G	E	0.394	0.058	0.017	0.925	0.541888888889	E
Om20812_MBZ3958194_	36	R	E	0.616	0.018	0.019	0.964	0.567555555556	E
Om20812_MBZ3958194_	37	Q	E	0.587	0.018	0.019	0.964	0.590111111111	E
Om20812_MBZ3958194_	38	E	E	0.513	0.058	0.017	0.925	0.590222222222	E
Om20812_MBZ3958194_	39	H	E	0.382	0.109	0.005	0.886	0.575111111111	E
Om20812_MBZ3958194_	40	N	B	0.239	0.246	0.004	0.750	0.551444444444	E
Om20812_MBZ3958194_	41	A	B	0.234	0.502	0.002	0.495	0.510444444444	E
Om20812_MBZ3958194_	42	G	B	0.175	0.858	0.002	0.139	0.468777777778	.
Om20812_MBZ3958194_	43	I	B	0.149	0.879	0.010	0.111	0.438222222222	.
Om20812_MBZ3958194_	44	I	B	0.138	0.938	0.007	0.055	0.423111111111	.
Om20812_MBZ3958194_	45	G	B	0.14	0.938	0.007	0.055	0.408444444444	.
Om20812_MBZ3958194_	46	P	B	0.109	0.970	0.001	0.030	0.389666666667	.
Om20812_MBZ3958194_	47	V	E	0.258	0.970	0.001	0.030	0.381444444444	.
Om20812_MBZ3958194_	48	G	B	0.193	0.970	0.001	0.030	0.376666666667	.
Om20812_MBZ3958194_	49	W	B	0.23	0.970	0.001	0.030	0.376888888889	.
Om20812_MBZ3958194_	50	G	B	0.214	0.970	0.001	0.030	0.376777777778	.
Om20812_MBZ3958194_	51	T	E	0.325	0.970	0.001	0.030	0.362333333333	.
Om20812_MBZ3958194_	52	A	B	0.185	0.970	0.001	0.030	0.346555555556	.
Om20812_MBZ3958194_	53	I	B	0.166	0.975	0.003	0.022	0.327888888889	.
Om20812_MBZ3958194_	54	F	B	0.158	0.938	0.007	0.055	0.326	.
Om20812_MBZ3958194_	55	C	B	0.216	0.938	0.007	0.055	0.325	.
Om20812_MBZ3958194_	56	A	B	0.123	0.911	0.033	0.057	0.326888888889	.
Om20812_MBZ3958194_	57	V	B	0.117	0.870	0.077	0.053	0.353555555556	.
Om20812_MBZ3958194_	58	T	B	0.184	0.807	0.137	0.056	0.378333333333	.
Om20812_MBZ3958194_	59	V	B	0.181	0.701	0.107	0.192	0.405333333333	.
Om20812_MBZ3958194_	60	S	B	0.111	0.455	0.046	0.498	0.441444444444	.
Om20812_MBZ3958194_	61	G	B	0.247	0.176	0.004	0.820	0.473	.
Om20812_MBZ3958194_	62	G	B	0.357	0.109	0.005	0.886	0.497222222222	.
Om20812_MBZ3958194_	63	V	B	0.238	0.053	0.005	0.942	0.497	.
Om20812_MBZ3958194_	64	S	B	0.166	0.016	0.005	0.979	0.495222222222	.
Om20812_MBZ3958194_	65	A	B	0.225	0.018	0.019	0.964	0.483333333333	.
Om20812_MBZ3958194_	66	H	B	0.115	0.018	0.019	0.964	0.443666666667	.
Om20812_MBZ3958194_	67	L	B	0.049	0.115	0.016	0.868	0.399555555556	.
Om20812_MBZ3958194_	68	N	B	0.062	0.058	0.017	0.925	0.358444444444	.
Om20812_MBZ3958194_	69	P	B	0.048	0.694	0.003	0.303	0.321666666667	.
Om20812_MBZ3958194_	70	A	B	0.037	0.923	0.002	0.076	0.28	.
Om20812_MBZ3958194_	71	V	B	0.044	0.879	0.010	0.111	0.258555555556	.
Om20812_MBZ3958194_	72	T	B	0.036	0.879	0.010	0.111	0.247444444444	.
Om20812_MBZ3958194_	73	L	B	0.031	0.975	0.003	0.022	0.246	.
Om20812_MBZ3958194_	74	A	B	0.047	0.970	0.001	0.030	0.261888888889	.
Om20812_MBZ3958194_	75	L	B	0.092	0.988	0.000	0.012	0.309444444444	.
Om20812_MBZ3958194_	76	A	B	0.066	0.970	0.001	0.030	0.358666666667	.
Om20812_MBZ3958194_	77	S	B	0.094	0.970	0.001	0.030	0.397222222222	.
Om20812_MBZ3958194_	78	V	B	0.246	0.858	0.002	0.139	0.439222222222	.
Om20812_MBZ3958194_	79	K	E	0.413	0.321	0.003	0.675	0.474444444444	.
Om20812_MBZ3958194_	80	K	E	0.53	0.109	0.005	0.886	0.505444444444	E
Om20812_MBZ3958194_	81	F	B	0.127	0.053	0.005	0.942	0.533333333333	E
Om20812_MBZ3958194_	82	P	E	0.441	0.053	0.005	0.942	0.534555555556	E
Om20812_MBZ3958194_	83	I	B	0.194	0.406	0.004	0.590	0.534666666667	E
Om20812_MBZ3958194_	84	K	E	0.387	0.406	0.004	0.590	0.507555555556	E
Om20812_MBZ3958194_	85	K	B	0.276	0.406	0.004	0.590	0.477444444444	.
Om20812_MBZ3958194_	86	V	B	0.046	0.717	0.014	0.269	0.444222222222	.
Om20812_MBZ3958194_	87	P	B	0.119	0.879	0.010	0.111	0.404	.
Om20812_MBZ3958194_	88	L	B	0.155	0.879	0.010	0.111	0.374555555556	.
Om20812_MBZ3958194_	89	F	B	0.118	0.938	0.007	0.055	0.349333333333	.
Om20812_MBZ3958194_	90	F	B	0.112	0.975	0.003	0.022	0.329	.
Om20812_MBZ3958194_	91	V	B	0.187	0.970	0.001	0.030	0.324666666667	.
Om20812_MBZ3958194_	92	A	B	0.086	0.970	0.001	0.030	0.306444444444	.
Om20812_MBZ3958194_	93	Q	B	0.112	0.970	0.001	0.030	0.287666666667	.
Om20812_MBZ3958194_	94	Y	B	0.175	0.970	0.001	0.030	0.289888888889	.
Om20812_MBZ3958194_	95	T	B	0.183	0.970	0.001	0.030	0.297444444444	.
Om20812_MBZ3958194_	96	G	B	0.096	0.970	0.001	0.030	0.290111111111	.
Om20812_MBZ3958194_	97	A	B	0.071	0.988	0.000	0.012	0.290333333333	.
Om20812_MBZ3958194_	98	F	B	0.177	0.988	0.000	0.012	0.281888888889	.
Om20812_MBZ3958194_	99	F	B	0.13	0.988	0.000	0.012	0.270777777778	.
Om20812_MBZ3958194_	100	A	B	0.048	0.988	0.000	0.012	0.256555555556	.
Om20812_MBZ3958194_	101	A	B	0.078	0.970	0.001	0.030	0.263888888889	.
Om20812_MBZ3958194_	102	A	B	0.146	0.970	0.001	0.030	0.275888888889	.
Om20812_MBZ3958194_	103	V	B	0.083	0.970	0.001	0.030	0.271444444444	.
Om20812_MBZ3958194_	104	V	B	0.041	0.938	0.007	0.055	0.287666666667	.
Om20812_MBZ3958194_	105	F	B	0.15	0.879	0.010	0.111	0.329333333333	.
Om20812_MBZ3958194_	106	A	B	0.144	0.802	0.014	0.185	0.369555555556	.
Om20812_MBZ3958194_	107	I	B	0.103	0.622	0.015	0.363	0.405555555556	.
Om20812_MBZ3958194_	108	Y	B	0.131	0.430	0.016	0.555	0.436111111111	.
Om20812_MBZ3958194_	109	R	E	0.296	0.406	0.004	0.590	0.484777777778	.
Om20812_MBZ3958194_	110	D	E	0.569	0.321	0.003	0.675	0.503111111111	E
Om20812_MBZ3958194_	111	A	E	0.327	0.406	0.004	0.590	0.515	E
Om20812_MBZ3958194_	112	I	B	0.117	0.522	0.016	0.462	0.553111111111	E
Om20812_MBZ3958194_	113	D	E	0.494	0.522	0.016	0.462	0.579	E
Om20812_MBZ3958194_	114	A	E	0.44	0.430	0.016	0.555	0.596888888889	E
Om20812_MBZ3958194_	115	V	B	0.166	0.354	0.048	0.598	0.603555555556	E
Om20812_MBZ3958194_	116	D	E	0.49	0.268	0.043	0.689	0.624	E
Om20812_MBZ3958194_	117	S	E	0.415	0.184	0.043	0.773	0.629111111111	E
Om20812_MBZ3958194_	118	G	E	0.382	0.184	0.043	0.773	0.613888888889	E
Om20812_MBZ3958194_	119	V	B	0.292	0.184	0.043	0.773	0.624555555556	E
Om20812_MBZ3958194_	120	R	E	0.341	0.191	0.086	0.723	0.638111111111	E
Om20812_MBZ3958194_	121	S	B	0.236	0.191	0.086	0.723	0.623444444444	E
Om20812_MBZ3958194_	122	V	B	0.256	0.199	0.152	0.649	0.614777777778	E
Om20812_MBZ3958194_	123	L	B	0.279	0.191	0.086	0.723	0.600333333333	E
Om20812_MBZ3958194_	124	G	B	0.273	0.191	0.086	0.723	0.583888888889	E
Om20812_MBZ3958194_	125	P	E	0.355	0.184	0.043	0.773	0.554111111111	E
Om20812_MBZ3958194_	126	T	E	0.311	0.184	0.043	0.773	0.550555555556	E
Om20812_MBZ3958194_	127	G	B	0.225	0.113	0.087	0.800	0.545	E
Om20812_MBZ3958194_	128	T	E	0.294	0.118	0.150	0.732	0.515666666667	E
Om20812_MBZ3958194_	129	A	B	0.217	0.052	0.084	0.864	0.494333333333	.
Om20812_MBZ3958194_	130	P	B	0.241	0.052	0.084	0.864	0.477555555556	.
Om20812_MBZ3958194_	131	I	B	0.096	0.064	0.216	0.721	0.470444444444	.
Om20812_MBZ3958194_	132	F	B	0.074	0.066	0.296	0.638	0.473	.
Om20812_MBZ3958194_	133	A	B	0.105	0.022	0.359	0.619	0.484555555556	.
Om20812_MBZ3958194_	134	T	B	0.098	0.066	0.296	0.638	0.507	E
Om20812_MBZ3958194_	135	Y	B	0.237	0.056	0.142	0.802	0.515888888889	E
Om20812_MBZ3958194_	136	P	E	0.308	0.053	0.043	0.903	0.513	E
Om20812_MBZ3958194_	137	R	B	0.261	0.058	0.017	0.925	0.532	E
Om20812_MBZ3958194_	138	E	E	0.423	0.058	0.017	0.925	0.541444444444	E
Om20812_MBZ3958194_	139	G	E	0.395	0.058	0.017	0.925	0.533555555556	E
Om20812_MBZ3958194_	140	I	B	0.108	0.113	0.043	0.844	0.511666666667	E
Om20812_MBZ3958194_	141	S	B	0.132	0.181	0.016	0.803	0.472666666667	.
Om20812_MBZ3958194_	142	T	B	0.188	0.717	0.014	0.269	0.448111111111	.
Om20812_MBZ3958194_	143	L	B	0.162	0.694	0.003	0.303	0.41	.
Om20812_MBZ3958194_	144	T	B	0.163	0.782	0.003	0.216	0.388555555556	.
Om20812_MBZ3958194_	145	C	B	0.08	0.802	0.014	0.185	0.387222222222	.
Om20812_MBZ3958194_	146	F	B	0.124	0.938	0.007	0.055	0.369888888889	.
Om20812_MBZ3958194_	147	I	B	0.187	0.938	0.007	0.055	0.359222222222	.
Om20812_MBZ3958194_	148	D	B	0.203	0.970	0.001	0.030	0.356	.
Om20812_MBZ3958194_	149	Q	B	0.096	0.970	0.001	0.030	0.348	.
Om20812_MBZ3958194_	150	V	B	0.197	0.975	0.003	0.022	0.356	.
Om20812_MBZ3958194_	151	V	B	0.232	0.975	0.003	0.022	0.347333333333	.
Om20812_MBZ3958194_	152	A	B	0.118	0.970	0.001	0.030	0.337111111111	.
Om20812_MBZ3958194_	153	T	B	0.097	0.970	0.001	0.030	0.314111111111	.
Om20812_MBZ3958194_	154	G	B	0.166	0.970	0.001	0.030	0.300777777778	.
Om20812_MBZ3958194_	155	C	B	0.178	0.970	0.001	0.030	0.286666666667	.
Om20812_MBZ3958194_	156	L	B	0.095	0.970	0.001	0.030	0.261	.
Om20812_MBZ3958194_	157	V	B	0.087	0.975	0.003	0.022	0.259444444444	.
Om20812_MBZ3958194_	158	L	B	0.172	0.975	0.003	0.022	0.262555555556	.
Om20812_MBZ3958194_	159	T	B	0.076	0.938	0.007	0.055	0.261111111111	.
Om20812_MBZ3958194_	160	A	B	0.067	0.938	0.007	0.055	0.265	.
Om20812_MBZ3958194_	161	E	B	0.068	0.911	0.033	0.057	0.282111111111	.
Om20812_MBZ3958194_	162	A	B	0.081	0.831	0.044	0.125	0.325222222222	.
Om20812_MBZ3958194_	163	I	B	0.056	0.701	0.107	0.192	0.373111111111	.
Om20812_MBZ3958194_	164	T	B	0.067	0.502	0.102	0.396	0.424555555556	.
Om20812_MBZ3958194_	165	D	B	0.174	0.354	0.048	0.598	0.480666666667	.
Om20812_MBZ3958194_	166	P	E	0.486	0.181	0.016	0.803	0.528444444444	E
Om20812_MBZ3958194_	167	R	E	0.538	0.176	0.004	0.820	0.567111111111	E
Om20812_MBZ3958194_	168	N	E	0.432	0.181	0.016	0.803	0.599444444444	E
Om20812_MBZ3958194_	169	F	E	0.489	0.115	0.016	0.868	0.629222222222	E
Om20812_MBZ3958194_	170	G	E	0.522	0.115	0.016	0.868	0.647	E
Om20812_MBZ3958194_	171	G	E	0.479	0.058	0.017	0.925	0.641444444444	E
Om20812_MBZ3958194_	172	L	E	0.385	0.058	0.017	0.925	0.62	E
Om20812_MBZ3958194_	173	P	E	0.36	0.058	0.017	0.925	0.600777777778	E
Om20812_MBZ3958194_	174	K	E	0.452	0.176	0.004	0.820	0.568222222222	E
Om20812_MBZ3958194_	175	P	B	0.269	0.406	0.004	0.590	0.521666666667	E
Om20812_MBZ3958194_	176	F	B	0.186	0.600	0.003	0.397	0.479666666667	.
Om20812_MBZ3958194_	177	Y	B	0.234	0.782	0.003	0.216	0.443	.
Om20812_MBZ3958194_	178	P	B	0.18	0.879	0.010	0.111	0.414666666667	.
Om20812_MBZ3958194_	179	L	E	0.246	0.938	0.007	0.055	0.386555555556	.
Om20812_MBZ3958194_	180	A	B	0.263	0.938	0.007	0.055	0.367444444444	.
Om20812_MBZ3958194_	181	L	B	0.224	0.938	0.007	0.055	0.342777777778	.
Om20812_MBZ3958194_	182	G	B	0.233	0.970	0.001	0.030	0.320111111111	.
Om20812_MBZ3958194_	183	L	E	0.307	0.988	0.000	0.012	0.308	.
Om20812_MBZ3958194_	184	M	B	0.231	0.988	0.000	0.012	0.317555555556	.
Om20812_MBZ3958194_	185	I	B	0.25	0.988	0.000	0.012	0.327555555556	.
Om20812_MBZ3958194_	186	S	B	0.195	0.988	0.000	0.012	0.339555555556	.
Om20812_MBZ3958194_	187	A	B	0.194	0.970	0.001	0.030	0.334	.
Om20812_MBZ3958194_	188	E	B	0.205	0.970	0.001	0.030	0.334444444444	.
Om20812_MBZ3958194_	189	I	B	0.157	0.923	0.002	0.076	0.324666666667	.
Om20812_MBZ3958194_	190	F	B	0.145	0.938	0.007	0.055	0.336111111111	.
Om20812_MBZ3958194_	191	A	B	0.136	0.879	0.010	0.111	0.349222222222	.
Om20812_MBZ3958194_	192	F	B	0.106	0.802	0.014	0.185	0.356222222222	.
Om20812_MBZ3958194_	193	S	B	0.057	0.694	0.003	0.303	0.357555555556	.
Om20812_MBZ3958194_	194	Y	B	0.186	0.600	0.003	0.397	0.358555555556	.
Om20812_MBZ3958194_	195	N	B	0.198	0.502	0.002	0.495	0.357444444444	.
Om20812_MBZ3958194_	196	C	B	0.07	0.321	0.003	0.675	0.369222222222	.
Om20812_MBZ3958194_	197	M	B	0.099	0.246	0.004	0.750	0.381	.
Om20812_MBZ3958194_	198	A	B	0.072	0.181	0.016	0.803	0.388	.
Om20812_MBZ3958194_	199	P	B	0.044	0.113	0.043	0.844	0.372222222222	.
Om20812_MBZ3958194_	200	L	B	0.024	0.191	0.086	0.723	0.363222222222	.
Om20812_MBZ3958194_	201	N	B	0.063	0.184	0.043	0.773	0.366666666667	.
Om20812_MBZ3958194_	202	P	B	0.049	0.522	0.016	0.462	0.354444444444	.
Om20812_MBZ3958194_	203	A	B	0.022	0.600	0.003	0.397	0.341444444444	.
Om20812_MBZ3958194_	204	R	B	0.081	0.600	0.003	0.397	0.336	.
Om20812_MBZ3958194_	205	D	B	0.072	0.694	0.003	0.303	0.332777777778	.
Om20812_MBZ3958194_	206	L	B	0.049	0.782	0.003	0.216	0.315222222222	.
Om20812_MBZ3958194_	207	G	B	0.025	0.858	0.002	0.139	0.304888888889	.
Om20812_MBZ3958194_	208	P	B	0.07	0.923	0.002	0.076	0.300444444444	.
Om20812_MBZ3958194_	209	R	B	0.13	0.970	0.001	0.030	0.294555555556	.
Om20812_MBZ3958194_	210	V	B	0.072	0.923	0.002	0.076	0.292333333333	.
Om20812_MBZ3958194_	211	F	B	0.032	0.923	0.002	0.076	0.305333333333	.
Om20812_MBZ3958194_	212	T	B	0.088	0.879	0.010	0.111	0.326555555556	.
Om20812_MBZ3958194_	213	A	B	0.121	0.802	0.014	0.185	0.350222222222	.
Om20812_MBZ3958194_	214	I	B	0.154	0.717	0.014	0.269	0.371666666667	.
Om20812_MBZ3958194_	215	A	B	0.118	0.522	0.016	0.462	0.401777777778	.
Om20812_MBZ3958194_	216	G	B	0.193	0.339	0.016	0.645	0.442777777778	.
Om20812_MBZ3958194_	217	W	B	0.195	0.257	0.016	0.727	0.480666666667	.
Om20812_MBZ3958194_	218	G	E	0.368	0.176	0.004	0.820	0.509	E
Om20812_MBZ3958194_	219	M	E	0.461	0.176	0.004	0.820	0.539555555556	E
Om20812_MBZ3958194_	220	E	E	0.577	0.115	0.016	0.868	0.551555555556	E
Om20812_MBZ3958194_	221	V	B	0.305	0.058	0.017	0.925	0.576222222222	E
Om20812_MBZ3958194_	222	F	B	0.184	0.058	0.017	0.925	0.582777777778	E
Om20812_MBZ3958194_	223	S	E	0.493	0.058	0.017	0.925	0.574333333333	E
Om20812_MBZ3958194_	224	V	E	0.514	0.058	0.017	0.925	0.563	E
Om20812_MBZ3958194_	225	R	E	0.441	0.018	0.019	0.964	0.545777777778	E
Om20812_MBZ3958194_	226	D	E	0.36	0.018	0.019	0.964	0.524222222222	E
Om20812_MBZ3958194_	227	Y	B	0.138	0.018	0.047	0.935	0.501333333333	E
Om20812_MBZ3958194_	228	V	B	0.258	0.052	0.084	0.864	0.456222222222	.
Om20812_MBZ3958194_	229	W	B	0.171	0.135	0.317	0.548	0.428555555556	.
Om20812_MBZ3958194_	230	M	B	0.087	0.252	0.423	0.325	0.382333333333	.
Om20812_MBZ3958194_	231	F	B	0.129	0.478	0.309	0.214	0.349333333333	.
Om20812_MBZ3958194_	232	V	B	0.073	0.701	0.107	0.192	0.316555555556	.
Om20812_MBZ3958194_	233	P	B	0.113	0.831	0.044	0.125	0.302111111111	.
Om20812_MBZ3958194_	234	I	B	0.139	0.831	0.044	0.125	0.288111111111	.
Om20812_MBZ3958194_	235	F	B	0.164	0.831	0.044	0.125	0.280222222222	.
Om20812_MBZ3958194_	236	A	B	0.089	0.802	0.014	0.185	0.271666666667	.
Om20812_MBZ3958194_	237	P	B	0.128	0.858	0.002	0.139	0.281222222222	.
Om20812_MBZ3958194_	238	H	B	0.225	0.970	0.001	0.030	0.292	.
Om20812_MBZ3958194_	239	V	B	0.25	0.970	0.001	0.030	0.301333333333	.
Om20812_MBZ3958194_	240	G	B	0.109	0.970	0.001	0.030	0.306222222222	.
Om20812_MBZ3958194_	241	G	B	0.083	0.988	0.000	0.012	0.324	.
Om20812_MBZ3958194_	242	V	B	0.232	0.988	0.000	0.012	0.339555555556	.
Om20812_MBZ3958194_	243	L	B	0.205	0.988	0.000	0.012	0.346444444444	.
Om20812_MBZ3958194_	244	G	B	0.108	0.988	0.000	0.012	0.353444444444	.
Om20812_MBZ3958194_	245	A	B	0.114	0.988	0.000	0.012	0.367222222222	.
Om20812_MBZ3958194_	246	W	E	0.254	0.988	0.000	0.012	0.384888888889	.
Om20812_MBZ3958194_	247	T	B	0.108	0.988	0.000	0.012	0.369555555556	.
Om20812_MBZ3958194_	248	Y	B	0.088	0.988	0.000	0.012	0.376	.
Om20812_MBZ3958194_	249	K	E	0.281	0.988	0.000	0.012	0.401	.
Om20812_MBZ3958194_	250	V	B	0.174	0.970	0.001	0.030	0.434666666667	.
Om20812_MBZ3958194_	251	C	B	0.042	0.938	0.007	0.055	0.448888888889	.
Om20812_MBZ3958194_	252	V	B	0.116	0.879	0.010	0.111	0.467444444444	.
Om20812_MBZ3958194_	253	E	E	0.317	0.522	0.016	0.462	0.496222222222	.
Om20812_MBZ3958194_	254	D	E	0.41	0.257	0.016	0.727	0.516777777778	E
Om20812_MBZ3958194_	255	N	E	0.539	0.115	0.016	0.868	0.532777777778	E
Om20812_MBZ3958194_	256	W	B	0.275	0.058	0.017	0.925	0.577	E
Om20812_MBZ3958194_	257	P	E	0.594	0.058	0.017	0.925	0.595333333333	E
Om20812_MBZ3958194_	258	E	E	0.66	0.058	0.017	0.925	0.602555555556	E
Om20812_MBZ3958194_	259	E	E	0.659	0.058	0.017	0.925	0.602444444444	E
Om20812_MBZ3958194_	260	E	E	0.653	0.115	0.016	0.868	0.606555555556	E
Om20812_MBZ3958194_	261	P	E	0.401	0.115	0.016	0.868	0.608888888889	E
Om20812_MBZ3958194_	262	T	E	0.459	0.115	0.016	0.868	0.602333333333	E
Om20812_MBZ3958194_	263	V	E	0.447	0.115	0.016	0.868	0.599555555556	E
Om20812_MBZ3958194_	264	I	E	0.637	0.115	0.016	0.868	0.598	E
Om20812_MBZ3958194_	265	L	E	0.334	0.257	0.016	0.727	0.595666666667	E
Om20812_MBZ3958194_	266	P	E	0.583	0.430	0.016	0.555	0.600444444444	E
Om20812_MBZ3958194_	267	V	E	0.425	0.430	0.016	0.555	0.601555555556	E
Om20812_MBZ3958194_	268	S	E	0.438	0.622	0.015	0.363	0.594777777778	E
Om20812_MBZ3958194_	269	T	E	0.42	0.717	0.014	0.269	0.586444444444	E
Om20812_MBZ3958194_	270	S	E	0.517	0.717	0.014	0.269	0.589555555556	E
Om20812_MBZ3958194_	271	K	E	0.559	0.802	0.014	0.185	0.592555555556	E
Om20812_MBZ3958194_	272	N	E	0.537	0.802	0.014	0.185	0.599333333333	E
Om20812_MBZ3958194_	273	S	E	0.46	0.802	0.014	0.185	0.596555555556	E
Om20812_MBZ3958194_	274	E	E	0.493	0.782	0.003	0.216	0.586666666667	E
Om20812_MBZ3958194_	275	L	E	0.557	0.600	0.003	0.397	0.580888888889	E
Om20812_MBZ3958194_	276	G	E	0.466	0.321	0.003	0.675	0.564222222222	E
Om20812_MBZ3958194_	277	P	E	0.538	0.115	0.016	0.868	0.500666666667	E
Om20812_MBZ3958194_	278	T	E	0.619	0.058	0.017	0.925	0.440555555556	.
Om20812_MBZ3958194_	279	W	B	0.287	0.018	0.019	0.964	0.370222222222	.
Om20812_MBZ3958194_	280	L	E	0.66	0.003	0.003	0.994	0.304	.

## Sheet: Chou_Fasman (turns)
Position	Residue	Start	End	Peptide	Score
4	Q	1	7	MKIQSTF	0.864
5	S	2	8	KIQSTFV	0.85
6	T	3	9	IQSTFVR	0.841
7	F	4	10	QSTFVRE	0.88
8	V	5	11	STFVREL	0.824
9	R	6	12	TFVRELI	0.687
10	E	7	13	FVRELIN	0.773
11	L	8	14	VRELINE	0.793
12	I	9	15	RELINEF	0.807
13	N	10	16	ELINEFL	0.756
14	E	11	17	LINEFLG	0.873
15	F	12	18	INEFLGT	0.926
16	L	13	19	NEFLGTF	0.944
17	G	14	20	EFLGTFT	0.859
18	T	15	21	FLGTFTL	0.837
19	F	16	22	LGTFTLI	0.819
20	T	17	23	GTFTLIV	0.806
21	L	18	24	TFTLIVF	0.669
22	I	19	25	FTLIVFG	0.754
23	V	20	26	TLIVFGD	0.877
24	F	21	27	LIVFGDS	0.944
25	G	22	28	IVFGDSV	0.931
26	D	23	29	VFGDSVM	0.95
27	S	24	30	FGDSVMA	0.973
28	V	25	31	GDSVMAI	0.954
29	M	26	32	DSVMAII	0.799
30	A	27	33	SVMAIIT	0.727
31	I	28	34	VMAIITA	0.617
32	I	29	35	MAIITAG	0.769
33	T	30	36	AIITAGR	0.819
34	A	31	37	IITAGRQ	0.864
35	G	32	38	ITAGRQE	0.903
36	R	33	39	TAGRQEH	0.971
37	Q	34	40	AGRQEHN	1057
38	E	35	41	GRQEHNA	1057
39	H	36	42	RQEHNAG	1057
40	N	37	43	QEHNAGI	0.989
41	A	38	44	EHNAGII	0.916
42	G	39	45	HNAGIIG	1033
43	I	40	46	NAGIIGP	1114
44	I	41	47	AGIIGPV	0.963
45	G	42	48	GIIGPVG	1091
46	P	43	49	IIGPVGW	1006
47	V	44	50	IGPVGWG	1161
48	G	45	51	GPVGWGT	1231
49	W	46	52	PVGWGTA	1103
50	G	47	53	VGWGTAI	0.953
51	T	48	54	GWGTAIF	0.967
52	A	49	55	WGTAIFC	0.914
53	I	50	56	GTAIFCA	0.871
54	F	51	57	TAIFCAV	0.72
55	C	52	58	AIFCAVT	0.72
56	A	53	59	IFCAVTV	0.697
57	V	54	60	FCAVTVS	0.834
58	T	55	61	CAVTVSG	0.971
59	V	56	62	AVTVSGG	1024
60	S	57	63	VTVSGGV	1001
61	G	58	64	TVSGGVS	1134
62	G	59	65	VSGGVSA	1091
63	V	60	66	SGGVSAH	1156
64	S	61	67	GGVSAHL	1036
65	A	62	68	GVSAHLN	1036
66	H	63	69	VSAHLNP	1.03
67	L	64	70	SAHLNPA	1053
68	N	65	71	AHLNPAV	0.92
69	P	66	72	HLNPAVT	0.963
70	A	67	73	LNPAVTL	0.911
71	V	68	74	NPAVTLA	0.921
72	T	69	75	PAVTLAL	0.783
73	L	70	76	AVTLALA	0.66
74	A	71	77	VTLALAS	0.77
75	L	72	78	TLALASV	0.77
76	A	73	79	LALASVK	0.777
77	S	74	80	ALASVKK	0.837
78	V	75	81	LASVKKF	0.829
79	K	76	82	ASVKKFP	0.961
80	K	77	83	SVKKFPI	0.934
81	F	78	84	VKKFPIK	0.874
82	P	79	85	KKFPIKK	0.947
83	I	80	86	KFPIKKV	0.874
84	K	81	87	FPIKKVP	0.947
85	K	82	88	PIKKVPL	0.946
86	V	83	89	IKKVPLF	0.814
87	P	84	90	KKVPLFF	0.833
88	L	85	91	KVPLFFV	0.76
89	F	86	92	VPLFFVA	0.71
90	F	87	93	PLFFVAQ	0.779
91	V	88	94	LFFVAQY	0.724
92	A	89	95	FFVAQYT	0.777
93	Q	90	96	FVAQYTG	0.914
94	Y	91	97	VAQYTGA	0.923
95	T	92	98	AQYTGAF	0.937
96	G	93	99	QYTGAFF	0.929
97	A	94	100	YTGAFFA	0.883
98	F	95	101	TGAFFAA	0.814
99	F	96	102	GAFFAAA	0.771
100	A	97	103	AFFAAAV	0.62
101	A	98	104	FFAAAVV	0.597
102	A	99	105	FAAAVVF	0.597
103	V	100	106	AAAVVFA	0.606
104	V	101	107	AAVVFAI	0.579
105	F	102	108	AVVFAIY	0.647
106	A	103	109	VVFAIYR	0.689
107	I	104	110	VFAIYRD	0.826
108	Y	105	111	FAIYRDA	0.849
109	R	106	112	AIYRDAI	0.83
110	D	107	113	IYRDAID	0.944
111	A	108	114	YRDAIDA	0.971
112	I	109	115	RDAIDAV	0.88
113	D	110	116	DAIDAVD	0.953
114	A	111	117	AIDAVDS	0.949
115	V	112	118	IDAVDSG	1077
116	D	113	119	DAVDSGV	1081
117	S	114	120	AVDSGVR	1009
118	G	115	121	VDSGVRS	1119
119	V	116	122	DSGVRSV	1119
120	R	117	123	SGVRSVL	0.994
121	S	118	124	GVRSVLG	1013
122	V	119	125	VRSVLGP	1007
123	L	120	126	RSVLGPT	1073
124	G	121	127	SVLGPTG	1.16
125	P	122	128	VLGPTGT	1093
126	T	123	129	LGPTGTA	1116
127	G	124	130	GPTGTAP	1249
128	T	125	131	PTGTAPI	1093
129	A	126	132	TGTAPIF	0.961
130	P	127	133	GTAPIFA	0.919
131	I	128	134	TAPIFAT	0.833
132	F	129	135	APIFATY	0.859
133	A	130	136	PIFATYP	0.981
134	T	131	137	IFATYPR	0.9
135	Y	132	138	FATYPRE	0.939
136	P	133	139	ATYPREG	1076
137	R	134	140	TYPREGI	1049
138	E	135	141	YPREGIS	1116
139	G	136	142	PREGIST	1.09
140	I	137	143	REGISTL	0.957
141	S	138	144	EGISTLT	0.959
142	T	139	145	GISTLTC	1023
143	L	140	146	ISTLTCF	0.886
144	T	141	147	STLTCFI	0.886
145	C	142	148	TLTCFID	0.89
146	F	143	149	LTCFIDQ	0.893
147	I	144	150	TCFIDQV	0.88
148	D	145	151	CFIDQVV	0.814
149	Q	146	152	FIDQVVA	0.739
150	V	147	153	IDQVVAT	0.79
151	V	148	154	DQVVATG	0.946
152	A	149	155	QVVATGC	0.907
153	T	150	156	VVATGCL	0.851
154	G	151	157	VATGCLV	0.851
155	C	152	158	ATGCLVL	0.864
156	L	153	159	TGCLVLT	0.907
157	V	154	160	GCLVLTA	0.864
158	L	155	161	CLVLTAE	0.747
159	T	156	162	LVLTAEA	0.671
160	A	157	163	VLTAEAI	0.654
161	E	158	164	LTAEAIT	0.72
162	A	159	165	TAEAITD	0.844
163	I	160	166	AEAITDP	0.924
164	T	161	167	EAITDPR	0.966
165	D	162	168	AITDPRN	1083
166	P	163	169	ITDPRNF	1074
167	R	164	170	TDPRNFG	1.23
168	N	165	171	DPRNFGG	1316
169	F	166	172	PRNFGGL	1191
170	G	167	173	RNFGGLP	1191
171	G	168	174	NFGGLPK	1.2
172	L	169	175	FGGLPKP	1194
173	P	170	176	GGLPKPF	1194
174	K	171	177	GLPKPFY	1134
175	P	172	178	LPKPFYP	1129
176	F	173	179	PKPFYPL	1129
177	Y	174	180	KPFYPLA	1006
178	P	175	181	PFYPLAL	0.946
179	L	176	182	FYPLALG	0.951
180	A	177	183	YPLALGL	0.95
181	L	178	184	PLALGLM	0.873
182	G	179	185	LALGLMI	0.723
183	L	180	186	ALGLMIS	0.843
184	M	181	187	LGLMISA	0.843
185	I	182	188	GLMISAE	0.864
186	S	183	189	LMISAEI	0.709
187	A	184	190	MISAEIF	0.71
188	E	185	191	ISAEIFA	0.719
189	I	186	192	SAEIFAF	0.737
190	F	187	193	AEIFAFS	0.737
191	A	188	194	EIFAFSY	0.806
192	F	189	195	IFAFSYN	0.923
193	S	190	196	FAFSYNC	1026
194	Y	191	197	AFSYNCM	1026
195	N	192	198	FSYNCMA	1026
196	C	193	199	SYNCMAP	1157
197	M	194	200	YNCMAPL	1037
198	A	195	201	NCMAPLN	1097
199	P	196	202	CMAPLNP	1091
200	L	197	203	MAPLNPA	1016
201	N	198	204	APLNPAR	1066
202	P	199	205	PLNPARD	1.18
203	A	200	206	LNPARDL	1047
204	R	201	207	NPARDLG	1186
205	D	202	208	PARDLGP	1.18
206	L	203	209	ARDLGPR	1099
207	G	204	210	RDLGPRV	1076
208	P	205	211	DLGPRVF	1026
209	R	206	212	LGPRVFT	0.954
210	V	207	213	GPRVFTA	0.964
211	F	208	214	PRVFTAI	0.809
212	T	209	215	RVFTAIA	0.686
213	A	210	216	VFTAIAG	0.773
214	I	211	217	FTAIAGW	0.839
215	A	212	218	TAIAGWG	0.976
216	G	213	219	AIAGWGM	0.924
217	W	214	220	IAGWGME	0.936
218	G	215	221	AGWGMEV	0.94
219	M	216	222	GWGMEVF	0.931
220	E	217	223	WGMEVFS	0.913
221	V	218	224	GMEVFSV	0.847
222	F	219	225	MEVFSVR	0.76
223	S	220	226	EVFSVRD	0.883
224	V	221	227	VFSVRDY	0.94
225	R	222	228	FSVRDYV	0.94
226	D	223	229	SVRDYVW	0.991
227	Y	224	230	VRDYVWM	0.873
228	V	225	231	RDYVWMF	0.887
229	W	226	232	DYVWMFV	0.823
230	M	227	233	YVWMFVP	0.831
231	F	228	234	VWMFVPI	0.736
232	V	229	235	WMFVPIF	0.75
233	P	230	236	MFVPIFA	0.707
234	I	231	237	FVPIFAP	0.839
235	F	232	238	VPIFAPH	0.889
236	A	233	239	PIFAPHV	0.889
237	P	234	240	IFAPHVG	0.894
238	H	235	241	FAPHVGG	1.05
239	V	236	242	APHVGGV	1036
240	G	237	243	PHVGGVL	1026
241	G	238	244	HVGGVLG	1031
242	V	239	245	VGGVLGA	0.99
243	L	240	246	GGVLGAW	1056
244	G	241	247	GVLGAWT	0.97
245	A	242	248	VLGAWTY	0.91
246	W	243	249	LGAWTYK	0.983
247	T	244	250	GAWTYKV	0.97
248	Y	245	251	AWTYKVC	0.917
249	K	246	252	WTYKVCV	0.894
250	V	247	253	TYKVCVE	0.863
251	C	248	254	YKVCVED	0.934
252	V	249	255	KVCVEDN	0.994
253	E	250	256	VCVEDNW	0.987
254	D	251	257	CVEDNWP	1133
255	N	252	258	VEDNWPE	1069
256	W	253	259	EDNWPEE	1103
257	P	254	260	DNWPEEE	1103
258	E	255	261	NWPEEEP	1111
259	E	256	262	WPEEEPT	1026
260	E	257	263	PEEEPTV	0.96
261	P	258	264	EEEPTVI	0.81
262	T	259	265	EEPTVIL	0.789
263	V	260	266	EPTVILP	0.9
264	I	261	267	PTVILPV	0.866
265	L	262	268	TVILPVS	0.853
266	P	263	269	VILPVST	0.853
267	V	264	270	ILPVSTS	0.986
268	S	265	271	LPVSTSK	1063
269	T	266	272	PVSTSKN	1201
270	S	267	273	VSTSKNS	1189
271	K	268	274	STSKNSE	1223
272	N	269	275	TSKNSEL	1103
273	S	270	276	SKNSELG	1189
274	E	271	277	KNSELGP	1201
275	L	272	278	NSELGPT	1194
276	G	273	279	SELGPTW	1109
277	P	274	280	ELGPTWL	0.989

## Sheet: Karplus (flex.)
Position	Residue	Start	End	Peptide	Score
4	Q	1	7	MKIQSTF	1044
5	S	2	8	KIQSTFV	1045
6	T	3	9	IQSTFVR	1024
7	F	4	10	QSTFVRE	1003
8	V	5	11	STFVREL	0.989
9	R	6	12	TFVRELI	0.981
10	E	7	13	FVRELIN	0.979
11	L	8	14	VRELINE	0.979
12	I	9	15	RELINEF	0.972
13	N	10	16	ELINEFL	0.972
14	E	11	17	LINEFLG	0.975
15	F	12	18	INEFLGT	0.98
16	L	13	19	NEFLGTF	0.988
17	G	14	20	EFLGTFT	0.991
18	T	15	21	FLGTFTL	0.986
19	F	16	22	LGTFTLI	0.97
20	T	17	23	GTFTLIV	0.951
21	L	18	24	TFTLIVF	0.932
22	I	19	25	FTLIVFG	0.923
23	V	20	26	TLIVFGD	0.936
24	F	21	27	LIVFGDS	0.958
25	G	22	28	IVFGDSV	0.983
26	D	23	29	VFGDSVM	0.987
27	S	24	30	FGDSVMA	0.973
28	V	25	31	GDSVMAI	0.939
29	M	26	32	DSVMAII	0.902
30	A	27	33	SVMAIIT	0.888
31	I	28	34	VMAIITA	0.893
32	I	29	35	MAIITAG	0.919
33	T	30	36	AIITAGR	0.956
34	A	31	37	IITAGRQ	0.999
35	G	32	38	ITAGRQE	1033
36	R	33	39	TAGRQEH	1053
37	Q	34	40	AGRQEHN	1056
38	E	35	41	GRQEHNA	1038
39	H	36	42	RQEHNAG	1012
40	N	37	43	QEHNAGI	0.985
41	A	38	44	EHNAGII	0.962
42	G	39	45	HNAGIIG	0.947
43	I	40	46	NAGIIGP	0.95
44	I	41	47	AGIIGPV	0.963
45	G	42	48	GIIGPVG	0.981
46	P	43	49	IIGPVGW	0.991
47	V	44	50	IGPVGWG	0.989
48	G	45	51	GPVGWGT	0.985
49	W	46	52	PVGWGTA	0.981
50	G	47	53	VGWGTAI	0.98
51	T	48	54	GWGTAIF	0.975
52	A	49	55	WGTAIFC	0.957
53	I	50	56	GTAIFCA	0.935
54	F	51	57	TAIFCAV	0.919
55	C	52	58	AIFCAVT	0.912
56	A	53	59	IFCAVTV	0.917
57	V	54	60	FCAVTVS	0.935
58	T	55	61	CAVTVSG	0.963
59	V	56	62	AVTVSGG	0.997
60	S	57	63	VTVSGGV	1027
61	G	58	64	TVSGGVS	1039
62	G	59	65	VSGGVSA	1026
63	V	60	66	SGGVSAH	0.996
64	S	61	67	GGVSAHL	0.966
65	A	62	68	GVSAHLN	0.948
66	H	63	69	VSAHLNP	0.951
67	L	64	70	SAHLNPA	0.967
68	N	65	71	AHLNPAV	0.982
69	P	66	72	HLNPAVT	0.987
70	A	67	73	LNPAVTL	0.976
71	V	68	74	NPAVTLA	0.959
72	T	69	75	PAVTLAL	0.943
73	L	70	76	AVTLALA	0.932
74	A	71	77	VTLALAS	0.926
75	L	72	78	TLALASV	0.93
76	A	73	79	LALASVK	0.944
77	S	74	80	ALASVKK	0.966
78	V	75	81	LASVKKF	0.991
79	K	76	82	ASVKKFP	1006
80	K	77	83	SVKKFPI	1007
81	F	78	84	VKKFPIK	1.0
82	P	79	85	KKFPIKK	1001
83	I	80	86	KFPIKKV	1009
84	K	81	87	FPIKKVP	1017
85	K	82	88	PIKKVPL	1018
86	V	83	89	IKKVPLF	0.998
87	P	84	90	KKVPLFF	0.972
88	L	85	91	KVPLFFV	0.948
89	F	86	92	VPLFFVA	0.931
90	F	87	93	PLFFVAQ	0.923
91	V	88	94	LFFVAQY	0.922
92	A	89	95	FFVAQYT	0.931
93	Q	90	96	FVAQYTG	0.947
94	Y	91	97	VAQYTGA	0.968
95	T	92	98	AQYTGAF	0.983
96	G	93	99	QYTGAFF	0.982
97	A	94	100	YTGAFFA	0.965
98	F	95	101	TGAFFAA	0.94
99	F	96	102	GAFFAAA	0.918
100	A	97	103	AFFAAAV	0.904
101	A	98	104	FFAAAVV	0.9
102	A	99	105	FAAAVVF	0.901
103	V	100	106	AAAVVFA	0.904
104	V	101	107	AAVVFAI	0.904
105	F	102	108	AVVFAIY	0.904
106	A	103	109	VVFAIYR	0.91
107	I	104	110	VFAIYRD	0.928
108	Y	105	111	FAIYRDA	0.953
109	R	106	112	AIYRDAI	0.974
110	D	107	113	IYRDAID	0.983
111	A	108	114	YRDAIDA	0.97
112	I	109	115	RDAIDAV	0.952
113	D	110	116	DAIDAVD	0.948
114	A	111	117	AIDAVDS	0.965
115	V	112	118	IDAVDSG	0.997
116	D	113	119	DAVDSGV	1033
117	S	114	120	AVDSGVR	1054
118	G	115	121	VDSGVRS	1052
119	V	116	122	DSGVRSV	1037
120	R	117	123	SGVRSVL	1017
121	S	118	124	GVRSVLG	1002
122	V	119	125	VRSVLGP	0.994
123	L	120	126	RSVLGPT	1004
124	G	121	127	SVLGPTG	1025
125	P	122	128	VLGPTGT	1047
126	T	123	129	LGPTGTA	1067
127	G	124	130	GPTGTAP	1069
128	T	125	131	PTGTAPI	1044
129	A	126	132	TGTAPIF	1.01
130	P	127	133	GTAPIFA	0.972
131	I	128	134	TAPIFAT	0.942
132	F	129	135	APIFATY	0.931
133	A	130	136	PIFATYP	0.941
134	T	131	137	IFATYPR	0.962
135	Y	132	138	FATYPRE	0.992
136	P	133	139	ATYPREG	1024
137	R	134	140	TYPREGI	1039
138	E	135	141	YPREGIS	1.05
139	G	136	142	PREGIST	1048
140	I	137	143	REGISTL	1036
141	S	138	144	EGISTLT	1025
142	T	139	145	GISTLTC	1003
143	L	140	146	ISTLTCF	0.974
144	T	141	147	STLTCFI	0.946
145	C	142	148	TLTCFID	0.932
146	F	143	149	LTCFIDQ	0.938
147	I	144	150	TCFIDQV	0.953
148	D	145	151	CFIDQVV	0.974
149	Q	146	152	FIDQVVA	0.977
150	V	147	153	IDQVVAT	0.971
151	V	148	154	DQVVATG	0.973
152	A	149	155	QVVATGC	0.97
153	T	150	156	VVATGCL	0.975
154	G	151	157	VATGCLV	0.97
155	C	152	158	ATGCLVL	0.952
156	L	153	159	TGCLVLT	0.941
157	V	154	160	GCLVLTA	0.938
158	L	155	161	CLVLTAE	0.945
159	T	156	162	LVLTAEA	0.956
160	A	157	163	VLTAEAI	0.962
161	E	158	164	LTAEAIT	0.96
162	A	159	165	TAEAITD	0.963
163	I	160	166	AEAITDP	0.974
164	T	161	167	EAITDPR	0.997
165	D	162	168	AITDPRN	1016
166	P	163	169	ITDPRNF	1023
167	R	164	170	TDPRNFG	1022
168	N	165	171	DPRNFGG	1012
169	F	166	172	PRNFGGL	1003
170	G	167	173	RNFGGLP	1.01
171	G	168	174	NFGGLPK	1.02
172	L	169	175	FGGLPKP	1033
173	P	170	176	GGLPKPF	1046
174	K	171	177	GLPKPFY	1038
175	P	172	178	LPKPFYP	1018
176	F	173	179	PKPFYPL	0.987
177	Y	174	180	KPFYPLA	0.958
178	P	175	181	PFYPLAL	0.941
179	L	176	182	FYPLALG	0.933
180	A	177	183	YPLALGL	0.933
181	L	178	184	PLALGLM	0.929
182	G	179	185	LALGLMI	0.919
183	L	180	186	ALGLMIS	0.909
184	M	181	187	LGLMISA	0.904
185	I	182	188	GLMISAE	0.913
186	S	183	189	LMISAEI	0.926
187	A	184	190	MISAEIF	0.939
188	E	185	191	ISAEIFA	0.937
189	I	186	192	SAEIFAF	0.926
190	F	187	193	AEIFAFS	0.916
191	A	188	194	EIFAFSY	0.911
192	F	189	195	IFAFSYN	0.917
193	S	190	196	FAFSYNC	0.922
194	Y	191	197	AFSYNCM	0.917
195	N	192	198	FSYNCMA	0.909
196	C	193	199	SYNCMAP	0.899
197	M	194	200	YNCMAPL	0.896
198	A	195	201	NCMAPLN	0.914
199	P	196	202	CMAPLNP	0.941
200	L	197	203	MAPLNPA	0.974
201	N	198	204	APLNPAR	1006
202	P	199	205	PLNPARD	1031
203	A	200	206	LNPARDL	1039
204	R	201	207	NPARDLG	1041
205	D	202	208	PARDLGP	1.04
206	L	203	209	ARDLGPR	1031
207	G	204	210	RDLGPRV	1026
208	P	205	211	DLGPRVF	1014
209	R	206	212	LGPRVFT	0.992
210	V	207	213	GPRVFTA	0.968
211	F	208	214	PRVFTAI	0.944
212	T	209	215	RVFTAIA	0.93
213	A	210	216	VFTAIAG	0.923
214	I	211	217	FTAIAGW	0.92
215	A	212	218	TAIAGWG	0.923
216	G	213	219	AIAGWGM	0.924
217	W	214	220	IAGWGME	0.927
218	G	215	221	AGWGMEV	0.931
219	M	216	222	GWGMEVF	0.931
220	E	217	223	WGMEVFS	0.93
221	V	218	224	GMEVFSV	0.931
222	F	219	225	MEVFSVR	0.938
223	S	220	226	EVFSVRD	0.957
224	V	221	227	VFSVRDY	0.978
225	R	222	228	FSVRDYV	0.991
226	D	223	229	SVRDYVW	0.984
227	Y	224	230	VRDYVWM	0.948
228	V	225	231	RDYVWMF	0.911
229	W	226	232	DYVWMFV	0.879
230	M	227	233	YVWMFVP	0.869
231	F	228	234	VWMFVPI	0.883
232	V	229	235	WMFVPIF	0.897
233	P	230	236	MFVPIFA	0.912
234	I	231	237	FVPIFAP	0.919
235	F	232	238	VPIFAPH	0.924
236	A	233	239	PIFAPHV	0.929
237	P	234	240	IFAPHVG	0.94
238	H	235	241	FAPHVGG	0.957
239	V	236	242	APHVGGV	0.969
240	G	237	243	PHVGGVL	0.983
241	G	238	244	HVGGVLG	0.983
242	V	239	245	VGGVLGA	0.97
243	L	240	246	GGVLGAW	0.958
244	G	241	247	GVLGAWT	0.942
245	A	242	248	VLGAWTY	0.936
246	W	243	249	LGAWTYK	0.943
247	T	244	250	GAWTYKV	0.952
248	Y	245	251	AWTYKVC	0.961
249	K	246	252	WTYKVCV	0.966
250	V	247	253	TYKVCVE	0.963
251	C	248	254	YKVCVED	0.965
252	V	249	255	KVCVEDN	0.973
253	E	250	256	VCVEDNW	0.984
254	D	251	257	CVEDNWP	0.998
255	N	252	258	VEDNWPE	1.01
256	W	253	259	EDNWPEE	1022
257	P	254	260	DNWPEEE	1045
258	E	255	261	NWPEEEP	1063
259	E	256	262	WPEEEPT	1075
260	E	257	263	PEEEPTV	1.07
261	P	258	264	EEEPTVI	1041
262	T	259	265	EEPTVIL	1009
263	V	260	266	EPTVILP	0.971
264	I	261	267	PTVILPV	0.947
265	L	262	268	TVILPVS	0.948
266	P	263	269	VILPVST	0.962
267	V	264	270	ILPVSTS	0.999
268	S	265	271	LPVSTSK	1038
269	T	266	272	PVSTSKN	1071
270	S	267	273	VSTSKNS	1103
271	K	268	274	STSKNSE	1112
272	N	269	275	TSKNSEL	1106
273	S	270	276	SKNSELG	1092
274	E	271	277	KNSELGP	1064
275	L	272	278	NSELGPT	1045
276	G	273	279	SELGPTW	1031

## Sheet: Parker (hidroph.)
Position	Residue	Start	End	Peptide	Score
4	Q	1	7	MKIQSTF	0.286
5	S	2	8	KIQSTFV	0.357
6	T	3	9	IQSTFVR	0.143
7	F	4	10	QSTFVRE	2.4
8	V	5	11	STFVREL	0.229
9	R	6	12	TFVRELI	-1843
10	E	7	13	FVRELIN	-1586
11	L	8	14	VRELINE	0.843
12	I	9	15	RELINEF	0.057
13	N	10	16	ELINEFL	-1857
14	E	11	17	LINEFLG	-2157
15	F	12	18	INEFLGT	-0.1
16	L	13	19	NEFLGTF	-0.271
17	G	14	20	EFLGTFT	-0.529
18	T	15	21	FLGTFTL	-2957
19	F	16	22	LGTFTLI	-2786
20	T	17	23	GTFTLIV	-2.0
21	L	18	24	TFTLIVF	-4129
22	I	19	25	FTLIVFG	-4057
23	V	20	26	TLIVFGD	-1314
24	F	21	27	LIVFGDS	-1129
25	G	22	28	IVFGDSV	-0.343
26	D	23	29	VFGDSVM	0.2
27	S	24	30	FGDSVMA	1029
28	V	25	31	GDSVMAI	1.2
29	M	26	32	DSVMAII	-0.757
30	A	27	33	SVMAIIT	-1443
31	I	28	34	VMAIITA	-2071
32	I	29	35	MAIITAG	-0.729
33	T	30	36	AIITAGR	0.471
34	A	31	37	IITAGRQ	1029
35	G	32	38	ITAGRQE	3286
36	R	33	39	TAGRQEH	4729
37	Q	34	40	AGRQEHN	4986
38	E	35	41	GRQEHNA	4986
39	H	36	42	RQEHNAG	4986
40	N	37	43	QEHNAGI	3243
41	A	38	44	EHNAGII	1243
42	G	39	45	HNAGIIG	0.943
43	I	40	46	NAGIIGP	0.943
44	I	41	47	AGIIGPV	-0.586
45	G	42	48	GIIGPVG	-0.071
46	P	43	49	IIGPVGW	-2314
47	V	44	50	IGPVGWG	-0.357
48	G	45	51	GPVGWGT	1529
49	W	46	52	PVGWGTA	1014
50	G	47	53	VGWGTAI	-0.429
51	T	48	54	GWGTAIF	-1214
52	A	49	55	WGTAIFC	-1829
53	I	50	56	GTAIFCA	-0.1
54	F	51	57	TAIFCAV	-1443
55	C	52	58	AIFCAVT	-1443
56	A	53	59	IFCAVTV	-2271
57	V	54	60	FCAVTVS	-0.2
58	T	55	61	CAVTVSG	1929
59	V	56	62	AVTVSGG	2543
60	S	57	63	VTVSGGV	1714
61	G	58	64	TVSGGVS	3171
62	G	59	65	VSGGVSA	2729
63	V	60	66	SGGVSAH	3557
64	S	61	67	GGVSAHL	1314
65	A	62	68	GVSAHLN	1.5
66	H	63	69	VSAHLNP	0.986
67	L	64	70	SAHLNPA	1814
68	N	65	71	AHLNPAV	0.357
69	P	66	72	HLNPAVT	0.8
70	A	67	73	LNPAVTL	-0.814
71	V	68	74	NPAVTLA	0.8
72	T	69	75	PAVTLAL	-1514
73	L	70	76	AVTLALA	-1514
74	A	71	77	VTLALAS	-0.886
75	L	72	78	TLALASV	-0.886
76	A	73	79	LALASVK	-0.814
77	S	74	80	ALASVKK	1314
78	V	75	81	LASVKKF	-0.3
79	K	76	82	ASVKKFP	1314
80	K	77	83	SVKKFPI	-0.129
81	F	78	84	VKKFPIK	-0.243
82	P	79	85	KKFPIKK	1.1
83	I	80	86	KFPIKKV	-0.243
84	K	81	87	FPIKKVP	-0.757
85	K	82	88	PIKKVPL	-0.757
86	V	83	89	IKKVPLF	-2371
87	P	84	90	KKVPLFF	-2543
88	L	85	91	KVPLFFV	-3886
89	F	86	92	VPLFFVA	-4.4
90	F	87	93	PLFFVAQ	-3014
91	V	88	94	LFFVAQY	-3586
92	A	89	95	FFVAQYT	-1529
93	Q	90	96	FVAQYTG	0.6
94	Y	91	97	VAQYTGA	2214
95	T	92	98	AQYTGAF	1429
96	G	93	99	QYTGAFF	-0.186
97	A	94	100	YTGAFFA	-0.743
98	F	95	101	TGAFFAA	-0.171
99	F	96	102	GAFFAAA	-0.614
100	A	97	103	AFFAAAV	-1957
101	A	98	104	FFAAAVV	-2786
102	A	99	105	FAAAVVF	-2786
103	V	100	106	AAAVVFA	-1171
104	V	101	107	AAVVFAI	-2614
105	F	102	108	AVVFAIY	-3186
106	A	103	109	VVFAIYR	-2886
107	I	104	110	VFAIYRD	-0.929
108	Y	105	111	FAIYRDA	-0.1
109	R	106	112	AIYRDAI	0.071
110	D	107	113	IYRDAID	1.2
111	A	108	114	YRDAIDA	2643
112	I	109	115	RDAIDAV	2386
113	D	110	116	DAIDAVD	3214
114	A	111	117	AIDAVDS	2714
115	V	112	118	IDAVDSG	3229
116	D	113	119	DAVDSGV	3843
117	S	114	120	AVDSGVR	3014
118	G	115	121	VDSGVRS	3643
119	V	116	122	DSGVRSV	3643
120	R	117	123	SGVRSVL	0.9
121	S	118	124	GVRSVLG	0.786
122	V	119	125	VRSVLGP	0.271
123	L	120	126	RSVLGPT	1543
124	G	121	127	SVLGPTG	1757
125	P	122	128	VLGPTGT	1571
126	T	123	129	LGPTGTA	2.4
127	G	124	130	GPTGTAP	4014
128	T	125	131	PTGTAPI	2057
129	A	126	132	TGTAPIF	0.443
130	P	127	133	GTAPIFA	0.0
131	I	128	134	TAPIFAT	-0.071
132	F	129	135	APIFATY	-1086
133	A	130	136	PIFATYP	-1086
134	T	131	137	IFATYPR	-0.786
135	Y	132	138	FATYPRE	1471
136	P	133	139	ATYPREG	3.6
137	R	134	140	TYPREGI	2157
138	E	135	141	YPREGIS	2343
139	G	136	142	PREGIST	3357
140	I	137	143	REGISTL	1743
141	S	138	144	EGISTLT	1886
142	T	139	145	GISTLTC	0.971
143	L	140	146	ISTLTCF	-1157
144	T	141	147	STLTCFI	-1157
145	C	142	148	TLTCFID	-0.657
146	F	143	149	LTCFIDQ	-0.543
147	I	144	150	TCFIDQV	0.243
148	D	145	151	CFIDQVV	-1029
149	Q	146	152	FIDQVVA	-0.929
150	V	147	153	IDQVVAT	1129
151	V	148	154	DQVVATG	3086
152	A	149	155	QVVATGC	1857
153	T	150	156	VVATGCL	-0.314
154	G	151	157	VATGCLV	-0.314
155	C	152	158	ATGCLVL	-1.1
156	L	153	159	TGCLVLT	-0.657
157	V	154	160	GCLVLTA	-1.1
158	L	155	161	CLVLTAE	-0.8
159	T	156	162	LVLTAEA	-0.7
160	A	157	163	VLTAEAI	-0.529
161	E	158	164	LTAEAIT	0.743
162	A	159	165	TAEAITD	3486
163	I	160	166	AEAITDP	3043
164	T	161	167	EAITDPR	3343
165	D	162	168	AITDPRN	3229
166	P	163	169	ITDPRNF	1614
167	R	164	170	TDPRNFG	3571
168	N	165	171	DPRNFGG	3643
169	F	166	172	PRNFGGL	0.9
170	G	167	173	RNFGGLP	0.9
171	G	168	174	NFGGLPK	1114
172	L	169	175	FGGLPKP	0.414
173	P	170	176	GGLPKPF	0.414
174	K	171	177	GLPKPFY	-0.671
175	P	172	178	LPKPFYP	-1186
176	F	173	179	PKPFYPL	-1186
177	Y	174	180	KPFYPLA	-1186
178	P	175	181	PFYPLAL	-3314
179	L	176	182	FYPLALG	-2.8
180	A	177	183	YPLALGL	-2.8
181	L	178	184	PLALGLM	-3129
182	G	179	185	LALGLMI	-4571
183	L	180	186	ALGLMIS	-2329
184	M	181	187	LGLMISA	-2329
185	I	182	188	GLMISAE	0.1
186	S	183	189	LMISAEI	-1857
187	A	184	190	MISAEIF	-1857
188	E	185	191	ISAEIFA	-0.957
189	I	186	192	SAEIFAF	-1129
190	F	187	193	AEIFAFS	-1129
191	A	188	194	EIFAFSY	-1.7
192	F	189	195	IFAFSYN	-1814
193	S	190	196	FAFSYNC	-0.471
194	Y	191	197	AFSYNCM	0.243
195	N	192	198	FSYNCMA	0.243
196	C	193	199	SYNCMAP	1857
197	M	194	200	YNCMAPL	-0.386
198	A	195	201	NCMAPLN	0.886
199	P	196	202	CMAPLNP	0.186
200	L	197	203	MAPLNPA	0.286
201	N	198	204	APLNPAR	1486
202	P	199	205	PLNPARD	2614
203	A	200	206	LNPARDL	1.0
204	R	201	207	NPARDLG	3129
205	D	202	208	PARDLGP	2429
206	L	203	209	ARDLGPR	2729
207	G	204	210	RDLGPRV	1.9
208	P	205	211	DLGPRVF	-0.014
209	R	206	212	LGPRVFT	-0.7
210	V	207	213	GPRVFTA	0.914
211	F	208	214	PRVFTAI	-1043
212	T	209	215	RVFTAIA	-1043
213	A	210	216	VFTAIAG	-0.829
214	I	211	217	FTAIAGW	-1729
215	A	212	218	TAIAGWG	0.4
216	G	213	219	AIAGWGM	-0.943
217	W	214	220	IAGWGME	-0.129
218	G	215	221	AGWGMEV	0.486
219	M	216	222	GWGMEVF	-1129
220	E	217	223	WGMEVFS	-1014
221	V	218	224	GMEVFSV	-0.114
222	F	219	225	MEVFSVR	-0.329
223	S	220	226	EVFSVRD	1.7
224	V	221	227	VFSVRDY	0.314
225	R	222	228	FSVRDYV	0.314
226	D	223	229	SVRDYVW	0.2
227	Y	224	230	VRDYVWM	-1329
228	V	225	231	RDYVWMF	-2114
229	W	226	232	DYVWMFV	-3243
230	M	227	233	YVWMFVP	-4371
231	F	228	234	VWMFVPI	-5243
232	V	229	235	WMFVPIF	-6029
233	P	230	236	MFVPIFA	-4.3
234	I	231	237	FVPIFAP	-3.4
235	F	232	238	VPIFAPH	-1786
236	A	233	239	PIFAPHV	-1786
237	P	234	240	IFAPHVG	-1271
238	H	235	241	FAPHVGG	0.686
239	V	236	242	APHVGGV	1471
240	G	237	243	PHVGGVL	-0.143
241	G	238	244	HVGGVLG	0.371
242	V	239	245	VGGVLGA	0.371
243	L	240	246	GGVLGAW	-0.529
244	G	241	247	GVLGAWT	-0.6
245	A	242	248	VLGAWTY	-1686
246	W	243	249	LGAWTYK	-0.343
247	T	244	250	GAWTYKV	0.443
248	Y	245	251	AWTYKVC	-0.171
249	K	246	252	WTYKVCV	-1.0
250	V	247	253	TYKVCVE	1543
251	C	248	254	YKVCVED	2229
252	V	249	255	KVCVEDN	3.5
253	E	250	256	VCVEDNW	1257
254	D	251	257	CVEDNWP	2086
255	N	252	258	VEDNWPE	3.0
256	W	253	259	EDNWPEE	4643
257	P	254	260	DNWPEEE	4643
258	E	255	261	NWPEEEP	3514
259	E	256	262	WPEEEPT	3257
260	E	257	263	PEEEPTV	4157
261	P	258	264	EEEPTVI	2714
262	T	259	265	EEPTVIL	0.286
263	V	260	266	EPTVILP	-0.529
264	I	261	267	PTVILPV	-2171
265	L	262	268	TVILPVS	-1543
266	P	263	269	VILPVST	-1543
267	V	264	270	ILPVSTS	-0.086
268	S	265	271	LPVSTSK	1871
269	T	266	272	PVSTSKN	4186
270	S	267	273	VSTSKNS	4814
271	K	268	274	STSKNSE	6457
272	N	269	275	TSKNSEL	4214
273	S	270	276	SKNSELG	4286
274	E	271	277	KNSELGP	3657
275	L	272	278	NSELGPT	3586
276	G	273	279	SELGPTW	1157
277	P	274	280	ELGPTWL	-1086

## Sheet: Kolaskar (antig.)
Position	Residue	Start	End	Peptide	Score
4	Q	1	7	MKIQSTF	0.991
5	S	2	8	KIQSTFV	1.07
6	T	3	9	IQSTFVR	1062
7	F	4	10	QSTFVRE	1019
8	V	5	11	STFVREL	1053
9	R	6	12	TFVRELI	1073
10	E	7	13	FVRELIN	1054
11	L	8	14	VRELINE	1019
12	I	9	15	RELINEF	0.978
13	N	10	16	ELINEFL	1032
14	E	11	17	LINEFLG	1035
15	F	12	18	INEFLGT	0.986
16	L	13	19	NEFLGTF	0.977
17	G	14	20	EFLGTFT	0.996
18	T	15	21	FLGTFTL	1053
19	F	16	22	LGTFTLI	1062
20	T	17	23	GTFTLIV	1081
21	L	18	24	TFTLIVF	1112
22	I	19	25	FTLIVFG	1107
23	V	20	26	TLIVFGD	1075
24	F	21	27	LIVFGDS	1.09
25	G	22	28	IVFGDSV	1109
26	D	23	29	VFGDSVM	1062
27	S	24	30	FGDSVMA	1017
28	V	25	31	GDSVMAI	1025
29	M	26	32	DSVMAII	1065
30	A	27	33	SVMAIIT	1071
31	I	28	34	VMAIITA	1079
32	I	29	35	MAIITAG	1006
33	T	30	36	AIITAGR	1013
34	A	31	37	IITAGRQ	1006
35	G	32	38	ITAGRQE	0.963
36	R	33	39	TAGRQEH	0.956
37	Q	34	40	AGRQEHN	0.937
38	E	35	41	GRQEHNA	0.937
39	H	36	42	RQEHNAG	0.937
40	N	37	43	QEHNAGI	0.977
41	A	38	44	EHNAGII	0.996
42	G	39	45	HNAGIIG	1.0
43	I	40	46	NAGIIGP	0.994
44	I	41	47	AGIIGPV	1.08
45	G	42	48	GIIGPVG	1053
46	P	43	49	IIGPVGW	1056
47	V	44	50	IGPVGWG	1016
48	G	45	51	GPVGWGT	0.982
49	W	46	52	PVGWGTA	1009
50	G	47	53	VGWGTAI	1021
51	T	48	54	GWGTAIF	0.98
52	A	49	55	WGTAIFC	1056
53	I	50	56	GTAIFCA	1081
54	F	51	57	TAIFCAV	1154
55	C	52	58	AIFCAVT	1154
56	A	53	59	IFCAVTV	1199
57	V	54	60	FCAVTVS	1179
58	T	55	61	CAVTVSG	1148
59	V	56	62	AVTVSGG	1071
60	S	57	63	VTVSGGV	1117
61	G	58	64	TVSGGVS	1064
62	G	59	65	VSGGVSA	1086
63	V	60	66	SGGVSAH	1046
64	S	61	67	GGVSAHL	1.08
65	A	62	68	GVSAHLN	1066
66	H	63	69	VSAHLNP	1093
67	L	64	70	SAHLNPA	1048
68	N	65	71	AHLNPAV	1101
69	P	66	72	HLNPAVT	1079
70	A	67	73	LNPAVTL	1099
71	V	68	74	NPAVTLA	1073
72	T	69	75	PAVTLAL	1141
73	L	70	76	AVTLALA	1141
74	A	71	77	VTLALAS	1133
75	L	72	78	TLALASV	1133
76	A	73	79	LALASVK	1136
77	S	74	80	ALASVKK	1.09
78	V	75	81	LASVKKF	1094
79	K	76	82	ASVKKFP	1068
80	K	77	83	SVKKFPI	1.08
81	F	78	84	VKKFPIK	1069
82	P	79	85	KKFPIKK	1004
83	I	80	86	KFPIKKV	1069
84	K	81	87	FPIKKVP	1088
85	K	82	88	PIKKVPL	1.11
86	V	83	89	IKKVPLF	1114
87	P	84	90	KKVPLFF	1106
88	L	85	91	KVPLFFV	1.17
89	F	86	92	VPLFFVA	1189
90	F	87	93	PLFFVAQ	1137
91	V	88	94	LFFVAQY	1151
92	A	89	95	FFVAQYT	1102
93	Q	90	96	FVAQYTG	1071
94	Y	91	97	VAQYTGA	1067
95	T	92	98	AQYTGAF	1025
96	G	93	99	QYTGAFF	1029
97	A	94	100	YTGAFFA	1036
98	F	95	101	TGAFFAA	1022
99	F	96	102	GAFFAAA	1045
100	A	97	103	AFFAAAV	1117
101	A	98	104	FFAAAVV	1163
102	A	99	105	FAAAVVF	1163
103	V	100	106	AAAVVFA	1159
104	V	101	107	AAVVFAI	1172
105	F	102	108	AVVFAIY	1185
106	A	103	109	VVFAIYR	1158
107	I	104	110	VFAIYRD	1084
108	Y	105	111	FAIYRDA	1039
109	R	106	112	AIYRDAI	1047
110	D	107	113	IYRDAID	1019
111	A	108	114	YRDAIDA	1007
112	I	109	115	RDAIDAV	1038
113	D	110	116	DAIDAVD	1037
114	A	111	117	AIDAVDS	1058
115	V	112	118	IDAVDSG	1031
116	D	113	119	DAVDSGV	1064
117	S	114	120	AVDSGVR	1065
118	G	115	121	VDSGVRS	1058
119	V	116	122	DSGVRSV	1058
120	R	117	123	SGVRSVL	1112
121	S	118	124	GVRSVLG	1093
122	V	119	125	VRSVLGP	1.12
123	L	120	126	RSVLGPT	1052
124	G	121	127	SVLGPTG	1052
125	P	122	128	VLGPTGT	1038
126	T	123	129	LGPTGTA	0.992
127	G	124	130	GPTGTAP	0.965
128	T	125	131	PTGTAPI	1005
129	A	126	132	TGTAPIF	1009
130	P	127	133	GTAPIFA	1031
131	I	128	134	TAPIFAT	1036
132	F	129	135	APIFATY	1072
133	A	130	136	PIFATYP	1072
134	T	131	137	IFATYPR	1045
135	Y	132	138	FATYPRE	1002
136	P	133	139	ATYPREG	0.971
137	R	134	140	TYPREGI	0.983
138	E	135	141	YPREGIS	0.998
139	G	136	142	PREGIST	0.962
140	I	137	143	REGISTL	0.989
141	S	138	144	EGISTLT	0.994
142	T	139	145	GISTLTC	1074
143	L	140	146	ISTLTCF	1105
144	T	141	147	STLTCFI	1105
145	C	142	148	TLTCFID	1084
146	F	143	149	LTCFIDQ	1099
147	I	144	150	TCFIDQV	1118
148	D	145	151	CFIDQVV	1186
149	Q	146	152	FIDQVVA	1136
150	V	147	153	IDQVVAT	1.11
151	V	148	154	DQVVATG	1071
152	A	149	155	QVVATGC	1149
153	T	150	156	VVATGCL	1182
154	G	151	157	VATGCLV	1182
155	C	152	158	ATGCLVL	1163
156	L	153	159	TGCLVLT	1141
157	V	154	160	GCLVLTA	1163
158	L	155	161	CLVLTAE	1.16
159	T	156	162	LVLTAEA	1.11
160	A	157	163	VLTAEAI	1096
161	E	158	164	LTAEAIT	1028
162	A	159	165	TAEAITD	0.974
163	I	160	166	AEAITDP	0.996
164	T	161	167	EAITDPR	0.968
165	D	162	168	AITDPRN	0.958
166	P	163	169	ITDPRNF	0.962
167	R	164	170	TDPRNFG	0.922
168	N	165	171	DPRNFGG	0.917
169	F	166	172	PRNFGGL	0.972
170	G	167	173	RNFGGLP	0.972
171	G	168	174	NFGGLPK	0.98
172	L	169	175	FGGLPKP	1021
173	P	170	176	GGLPKPF	1021
174	K	171	177	GLPKPFY	1062
175	P	172	178	LPKPFYP	1089
176	F	173	179	PKPFYPL	1089
177	Y	174	180	KPFYPLA	1089
178	P	175	181	PFYPLAL	1135
179	L	176	182	FYPLALG	1108
180	A	177	183	YPLALGL	1.13
181	L	178	184	PLALGLM	1083
182	G	179	185	LALGLMI	1095
183	L	180	186	ALGLMIS	1061
184	M	181	187	LGLMISA	1061
185	I	182	188	GLMISAE	1004
186	S	183	189	LMISAEI	1044
187	A	184	190	MISAEIF	1021
188	E	185	191	ISAEIFA	1055
189	I	186	192	SAEIFAF	1046
190	F	187	193	AEIFAFS	1046
191	A	188	194	EIFAFSY	1.06
192	F	189	195	IFAFSYN	1.05
193	S	190	196	FAFSYNC	1087
194	Y	191	197	AFSYNCM	1049
195	N	192	198	FSYNCMA	1049
196	C	193	199	SYNCMAP	1045
197	M	194	200	YNCMAPL	1079
198	A	195	201	NCMAPLN	1024
199	P	196	202	CMAPLNP	1065
200	L	197	203	MAPLNPA	1015
201	N	198	204	APLNPAR	1022
202	P	199	205	PLNPARD	0.994
203	A	200	206	LNPARDL	1.02
204	R	201	207	NPARDLG	0.967
205	D	202	208	PARDLGP	1008
206	L	203	209	ARDLGPR	0.981
207	G	204	210	RDLGPRV	1026
208	P	205	211	DLGPRVF	1057
209	R	206	212	LGPRVFT	1063
210	V	207	213	GPRVFTA	1037
211	F	208	214	PRVFTAI	1077
212	T	209	215	RVFTAIA	1077
213	A	210	216	VFTAIAG	1077
214	I	211	217	FTAIAGW	1007
215	A	212	218	TAIAGWG	0.976
216	G	213	219	AIAGWGM	0.964
217	W	214	220	IAGWGME	0.933
218	G	215	221	AGWGMEV	0.966
219	M	216	222	GWGMEVF	0.97
220	E	217	223	WGMEVFS	0.99
221	V	218	224	GMEVFSV	1.06
222	F	219	225	MEVFSVR	1.06
223	S	220	226	EVFSVRD	1066
224	V	221	227	VFSVRDY	1.11
225	R	222	228	FSVRDYV	1.11
226	D	223	229	SVRDYVW	1082
227	Y	224	230	VRDYVWM	1055
228	V	225	231	RDYVWMF	1013
229	W	226	232	DYVWMFV	1086
230	M	227	233	YVWMFVP	1114
231	F	228	234	VWMFVPI	1113
232	V	229	235	WMFVPIF	1071
233	P	230	236	MFVPIFA	1096
234	I	231	237	FVPIFAP	1.13
235	F	232	238	VPIFAPH	1132
236	A	233	239	PIFAPHV	1132
237	P	234	240	IFAPHVG	1105
238	H	235	241	FAPHVGG	1065
239	V	236	242	APHVGGV	1107
240	G	237	243	PHVGGVL	1133
241	G	238	244	HVGGVLG	1106
242	V	239	245	VGGVLGA	1.1
243	L	240	246	GGVLGAW	1.03
244	G	241	247	GVLGAWT	1035
245	A	242	248	VLGAWTY	1076
246	W	243	249	LGAWTYK	1012
247	T	244	250	GAWTYKV	1031
248	Y	245	251	AWTYKVC	1107
249	K	246	252	WTYKVCV	1153
250	V	247	253	TYKVCVE	1147
251	C	248	254	YKVCVED	1141
252	V	249	255	KVCVEDN	1086
253	E	250	256	VCVEDNW	1081
254	D	251	257	CVEDNWP	1035
255	N	252	258	VEDNWPE	0.955
256	W	253	259	EDNWPEE	0.879
257	P	254	260	DNWPEEE	0.879
258	E	255	261	NWPEEEP	0.907
259	E	256	262	WPEEEPT	0.926
260	E	257	263	PEEEPTV	0.996
261	P	258	264	EEEPTVI	1009
262	T	259	265	EEPTVIL	1066
263	V	260	266	EPTVILP	1096
264	I	261	267	PTVILPV	1172
265	L	262	268	TVILPVS	1165
266	P	263	269	VILPVST	1165
267	V	264	270	ILPVSTS	1112
268	S	265	271	LPVSTSK	1.08
269	T	266	272	PVSTSKN	1012
270	S	267	273	VSTSKNS	1005
271	K	268	274	STSKNSE	0.929
272	N	269	275	TSKNSEL	0.963
273	S	270	276	SKNSELG	0.958
274	E	271	277	KNSELGP	0.965
275	L	272	278	NSELGPT	0.962
276	G	273	279	SELGPTW	0.979
277	P	274	280	ELGPTWL	1013

## Sheet: BepiPred 2.0 Epit
Position	Residue	Score	Assignement
0	M	0.249	.
1	K	0.316	.
2	I	0.375	.
3	Q	0.411	.
4	S	0.461	.
5	T	0.468	.
6	F	0.451	.
7	V	0.446	.
8	R	0.431	.
9	E	0.413	.
10	L	0.381	.
11	I	0.366	.
12	N	0.362	.
13	E	0.341	.
14	F	0.324	.
15	L	0.317	.
16	G	0.309	.
17	T	0.298	.
18	F	0.299	.
19	T	0.301	.
20	L	0.287	.
21	I	0.292	.
22	V	0.303	.
23	F	0.302	.
24	G	0.310	.
25	D	0.302	.
26	S	0.309	.
27	V	0.310	.
28	M	0.327	.
29	A	0.355	.
30	I	0.383	.
31	I	0.417	.
32	T	0.464	.
33	A	0.505	E
34	G	0.545	E
35	R	0.575	E
36	Q	0.598	E
37	E	0.600	E
38	H	0.589	E
39	N	0.569	E
40	A	0.531	E
41	G	0.493	.
42	I	0.459	.
43	I	0.445	.
44	G	0.428	.
45	P	0.406	.
46	V	0.396	.
47	G	0.389	.
48	W	0.387	.
49	G	0.384	.
50	T	0.367	.
51	A	0.348	.
52	I	0.324	.
53	F	0.322	.
54	C	0.323	.
55	A	0.322	.
56	V	0.349	.
57	T	0.372	.
58	V	0.394	.
59	S	0.427	.
60	G	0.457	.
61	G	0.477	.
62	V	0.475	.
63	S	0.470	.
64	A	0.459	.
65	H	0.420	.
66	L	0.378	.
67	N	0.345	.
68	P	0.311	.
69	A	0.272	.
70	V	0.254	.
71	T	0.243	.
72	L	0.246	.
73	A	0.262	.
74	L	0.310	.
75	A	0.358	.
76	S	0.399	.
77	V	0.440	.
78	K	0.474	.
79	K	0.509	E
80	F	0.534	E
81	P	0.530	E
82	I	0.528	E
83	K	0.507	E
84	K	0.463	.
85	V	0.425	.
86	P	0.383	.
87	L	0.354	.
88	F	0.326	.
89	F	0.309	.
90	V	0.309	.
91	A	0.294	.
92	Q	0.277	.
93	Y	0.283	.
94	T	0.292	.
95	G	0.286	.
96	A	0.288	.
97	F	0.280	.
98	F	0.271	.
99	A	0.258	.
100	A	0.263	.
101	A	0.274	.
102	V	0.266	.
103	V	0.280	.
104	F	0.320	.
105	A	0.357	.
106	I	0.385	.
107	Y	0.411	.
108	R	0.455	.
109	D	0.503	E
110	A	0.515	E
111	I	0.534	E
112	D	0.564	E
113	A	0.584	E
114	V	0.593	E
115	D	0.620	E
116	S	0.631	E
117	G	0.628	E
118	V	0.650	E
119	R	0.666	E
120	S	0.655	E
121	V	0.649	E
122	L	0.634	E
123	G	0.621	E
124	P	0.593	E
125	T	0.582	E
126	G	0.562	E
127	T	0.518	E
128	A	0.487	.
129	P	0.468	.
130	I	0.449	.
131	F	0.439	.
132	A	0.451	.
133	T	0.507	E
134	Y	0.515	E
135	P	0.513	E
136	R	0.521	E
137	E	0.536	E
138	G	0.530	E
139	I	0.521	E
140	S	0.506	.
141	T	0.481	.
142	L	0.439	.
143	T	0.416	.
144	C	0.409	.
145	F	0.388	.
146	I	0.378	.
147	D	0.368	.
148	Q	0.356	.
149	V	0.351	.
150	V	0.339	.
151	A	0.335	.
152	T	0.317	.
153	G	0.305	.
154	C	0.293	.
155	L	0.269	.
156	V	0.271	.
157	L	0.274	.
158	T	0.273	.
159	A	0.279	.
160	E	0.292	.
161	A	0.334	.
162	I	0.381	.
163	T	0.431	.
164	D	0.485	.
165	P	0.528	E
166	R	0.567	E
167	N	0.594	E
168	F	0.618	E
169	G	0.636	E
170	G	0.632	E
171	L	0.610	E
172	P	0.592	E
173	K	0.560	E
174	P	0.518	E
175	F	0.475	.
176	Y	0.443	.
177	P	0.420	.
178	L	0.390	.
179	A	0.370	.
180	L	0.346	.
181	G	0.323	.
182	L	0.310	.
183	M	0.318	.
184	I	0.330	.
185	S	0.343	.
186	A	0.339	.
187	E	0.338	.
188	I	0.330	.
189	F	0.343	.
190	A	0.359	.
191	F	0.369	.
192	S	0.371	.
193	Y	0.372	.
194	N	0.369	.
195	C	0.379	.
196	M	0.393	.
197	A	0.398	.
198	P	0.382	.
199	L	0.371	.
200	N	0.372	.
201	P	0.358	.
202	A	0.345	.
203	R	0.340	.
204	D	0.337	.
205	L	0.319	.
206	G	0.307	.
207	P	0.304	.
208	R	0.296	.
209	V	0.293	.
210	F	0.306	.
211	T	0.330	.
212	A	0.356	.
213	I	0.378	.
214	A	0.409	.
215	G	0.451	.
216	W	0.488	.
217	G	0.522	E
218	M	0.555	E
219	E	0.566	E
220	V	0.588	E
221	F	0.592	E
222	S	0.584	E
223	V	0.574	E
224	R	0.559	E
225	D	0.545	E
226	Y	0.518	E
227	V	0.476	.
228	W	0.450	.
229	M	0.401	.
230	F	0.368	.
231	V	0.334	.
232	P	0.316	.
233	I	0.300	.
234	F	0.285	.
235	A	0.275	.
236	P	0.280	.
237	H	0.290	.
238	V	0.301	.
239	G	0.305	.
240	G	0.322	.
241	V	0.339	.
242	L	0.345	.
243	G	0.352	.
244	A	0.366	.
245	W	0.383	.
246	T	0.367	.
247	Y	0.373	.
248	K	0.400	.
249	V	0.434	.
250	C	0.450	.
251	V	0.467	.
252	E	0.493	.
253	D	0.507	E
254	N	0.517	E
255	W	0.549	E
256	P	0.565	E
257	E	0.562	E
258	E	0.560	E
259	E	0.558	E
260	P	0.560	E
261	T	0.559	E
262	V	0.565	E
263	I	0.572	E
264	L	0.581	E
265	P	0.587	E
266	V	0.599	E
267	S	0.595	E
268	T	0.594	E
269	S	0.595	E
270	K	0.595	E
271	N	0.594	E
272	S	0.591	E
273	E	0.582	E
274	L	0.568	E
275	G	0.497	.
276	P	0.434	.
277	T	0.370	.
278	W	0.304	.

[truncated: 10 more sheets: BepiPred 1.0, ABCpred, BcePred,  Ellipro (non-linear B), MHC I Pig, MHC I Pig list, MHC II Human, MHC II Mouse, NetChop, PCPS]
