# Supplementary material for: First Data on Ornithodoros moubata Aquaporins: Structural, Phylogenetic and Immunogenic Characterisation as Vaccine Targets
Source: Pathogens. 2022 Jun 16;11(6):694. doi: 10.3390/pathogens11060694 (PMC9227307; doi:10.3390/pathogens11060694)
Supplement: Supplementary file 1 [file pathogens-11-00694-s001.zip › Table S6.xlsx]

## Sheet: Summary
Table S6: Structural, physicochemical and epitope predictions for Om22982
Position	O-glycosilation	Sequence	TMHMM	Emini (accesibility)	BepiPred 2.0 (surface)	Chou & Fasman (turns)	Karplus & Scoultz (flexibility)	Parker (hydrophilicity)	Kolaskar & Tongaonkar	BepiPred 2.0 (epit)	BepiPred 1.0	ABCpred	BcePred	Ellipro	MHC I IEDB Pig	MHC II IEDB Human	MHC II IEDB Mouse	NetChop		CEG
1		M	i		E					.	.	.	.	.	.	T	.	S	S
2		K	i		E					.	.	.	.	.	.	T	.	.	.
3		I	i	E	E					.	.	.	.	.	T	T	.	S	.
4		Q	i	E	E	.	E	.	.	.	.	.	.	.	T	T	.	.	.
5		S	i	.	E	.	E	.	.	.	.	.	.	B	T	T	.	.	.
6		T	i	E	E	.	E	.	B	.	.	.	.	B	T	T	.	.	.
7		F	i	E	.	.	E	.	.	.	.	.	.	B	T	T	.	S	S
8		V	i	.	.	.	E	.	.	.	.	.	.	B	T	T	.	S	S
9		R	i	.	.	.	E	.	B	.	.	.	.	B	T	T	.	.	.
10		E	i	.	.	.	E	.	.	.	.	.	.	B	T	T	.	.	.
11		L	M	E	.	.	E	.	.	.	.	.	B	B	T	T	.	S	S
12		I	M	.	.	.	.	.	.	.	.	.	B	B	T	T	.	.	S
13		N	M	.	.	.	.	.	.	.	.	.	.	B	T	T	.	.	.
14		E	M	.	.	.	E	.	.	.	.	.	.	.	T	T	.	.	.
15		F	M	E	.	.	E	.	.	.	.	.	.	.	T	T	.	S	S
16		L	M	.	.	.	E	.	.	.	.	.	.	B	T	T	.	.	S
17		G	M	.	.	.	E	.	.	.	.	.	.	.	T	T	.	.	.
18		T	M	.	.	.	E	.	.	.	.	.	.	.	T	T	.	.	.
19		F	M	.	.	.	.	.	B	.	.	.	.	.	T	T	.	S	S
20		T	M	.	.	.	.	.	B	.	.	.	.	.	T	T	.	.	.
21		L	M	.	.	.	.	.	B	.	.	.	B	.	T	T	.	S	S
22		I	M	.	.	.	.	.	B	.	.	.	B	.	T	T	.	S	.
23		V	M	.	.	.	.	.	B	.	.	.	.	.	T	T	.	S	.
24		F	M	.	.	.	.	.	.	.	.	.	B	.	T	T	.	.	S
25		G	M	.	.	.	E	.	B	.	.	.	B	.	T	T	.	.	.
26		D	M	.	.	.	E	.	B	.	.	.	.	.	T	T	.	.	.
27		S	M	.	.	.	E	E	.	.	.	.	.	.	T	T	.	.	.
28		V	M	.	.	.	.	.	.	.	.	.	.	.	T	T	.	.	.
29		M	M	.	.	.	.	.	B	.	.	.	.	.	T	T	.	.	S
30		A	M	.	.	.	.	.	B	.	.	B	.	.	T	T	.	.	.
31		I	M	.	.	.	.	.	B	.	.	B	.	B	T	T	.	.	.
32		I	M	.	.	.	.	.	.	.	.	B	.	B	T	T	.	.	.
33		I	M	.	.	.	.	.	.	.	.	B	.	.	.	T	.	S	S
34		A	o	.	.	.	.	.	.	B	.	B	.	B	.	T	.	.	.
35		G	o	E	E	.	E	.	.	B	.	B	.	B	T	T	.	.	.
36		R	o	E	E	.	E	E	.	B	.	B	B	B	T	.	.	S	.
37		Q	o	E	E	E	E	E	.	B	B	B	B	B	T	.	.	.	.
38		E	o	E	E	E	E	E	.	B	B	B	B	B	T	.	.	.	.
39		H	o	E	E	E	E	E	.	B	B	B	B	B	T	.	.	.	.
40		N	o	.	.	.	E	E	.	B	B	B	B	B	T	.	.	.	.
41		A	o	.	.	.	.	E	.	B	B	B	.	B	T	.	.	.	.
42		G	o	.	.	E	.	.	.	.	B	B	.	.	T	.	.	.	.
43		I	M	.	.	E	.	.	.	.	.	B	.	B	T	.	.	S	.
44		I	M	.	.	.	.	.	.	.	B	B	.	B	T	.	.	.	S
45		G	M	.	.	E	E	.	.	.	.	B	.	.	T	.	.	.	.
46		P	M	.	.	E	E	.	B	.	B	B	.	.	T	.	.	.	.
47		V	M	.	E	E	E	.	.	.	B	B	.	.	T	.	.	.	S
48		G	M	.	.	E	E	E	.	.	B	B	.	.	T	.	.	.	.
49		W	M	.	.	E	E	E	.	.	B	B	.	.	T	.	.	S	S
50		G	M	.	.	.	E	.	.	.	.	B	.	.	T	.	.	.	.
51		T	M	.	E	.	E	.	.	.	.	B	.	.	T	.	.	.	.
52		A	M	.	.	.	.	.	B	.	.	B	.	.	T	.	.	.	.
53		I	M	.	.	.	.	.	B	.	.	B	.	.	T	.	.	S	.
54		F	M	.	.	.	.	.	B	.	.	B	.	.	.	.	.	S	S
55		C	M	.	.	.	.	.	B	.	.	B	.	.	.	.	.	.	.
56		A	M	.	.	.	.	.	B	.	.	B	.	.	.	.	T	.	.
57		V	M	.	.	.	.	.	B	.	.	B	.	.	.	.	T	.	S
58		T	M	.	.	.	.	E	B	.	.	B	.	B	T	.	T	.	.
59		V	M	.	.	E	E	E	B	.	.	B	.	.	T	.	T	S	S
60		S	M	.	.	E	E	E	B	.	.	B	B	.	T	.	T	.	.
61		G	M	.	.	E	E	E	B	.	.	B	.	B	T	.	T	.	.
62		G	M	.	E	E	E	E	B	.	B	B	.	.	T	.	T	.	.
63		V	M	.	.	E	E	E	.	.	.	B	.	.	T	.	T	S	S
64		S	M	.	.	E	.	E	.	.	B	B	.	.	T	.	T	.	.
65		A	M	.	.	E	.	.	B	.	B	B	.	.	T	.	T	S	.
66		H	i	E	.	.	.	.	B	.	B	B	B	.	T	.	T	.	.
67		L	i	E	.	E	.	E	.	.	.	B	B	.	T	.	T	S	S
68		N	i	.	.	.	E	.	B	.	.	B	B	.	T	.	T	.	.
69		P	i	.	.	.	E	.	B	.	.	B	.	.	T	.	T	.	.
70		A	i	.	.	.	E	.	B	.	.	.	.	.	T	.	T	.	.
71		V	i	.	.	.	.	.	B	.	.	.	.	.	T	T	T	.	S
72		T	i	.	.	.	.	.	B	.	.	.	.	.	T	T	T	.	.
73		L	i	.	.	.	.	.	B	.	.	.	.	.	T	T	T	S	S
74		A	i	.	.	.	.	.	B	.	.	.	.	.	T	T	T	S	.
75		L	i	.	.	.	.	.	B	.	.	.	.	.	T	T	T	S	S
76		A	i	.	.	.	.	.	B	.	.	.	.	B	T	T	T	S	.
77		S	i	E	.	.	.	E	.	.	.	.	.	B	T	T	T	.	.
78		V	i	E	.	.	E	.	B	.	.	.	.	B	T	T	T	S	S
79		K	i	.	E	.	E	E	B	.	.	.	.	B	T	T	T	S	.
80		K	i	E	E	.	E	.	.	B	.	.	.	B	T	T	T	S	.
81		F	i	E	.	.	E	.	B	B	.	.	B	B	T	T	T	.	S
82		P	i	E	E	.	E	.	.	B	.	.	B	B	T	T	T	.	.
83		I	i	E	.	.	E	.	B	B	.	.	B	B	T	T	T	.	S
84		K	i	E	E	.	E	.	B	B	.	.	B	B	T	T	T	S	.
85		K	i	.	.	.	E	.	.	.	.	.	B	B	T	T	T	.	.
86		V	M	E	.	.	E	.	B	.	.	.	B	B	T	T	T	.	.
87		P	M	.	.	.	.	.	B	.	.	.	B	B	T	T	T	.	.
88		L	M	.	.	.	.	.	.	.	.	.	B	B	T	T	T	S	S
89		F	M	.	.	.	.	.	B	.	.	.	.	.	T	T	T	S	S
90		F	M	.	.	.	.	.	B	.	.	.	.	.	T	T	T	.	S
91		V	M	.	.	.	.	.	B	.	.	.	.	B	T	T	T	.	S
92		A	M	.	.	.	.	.	B	.	.	.	.	.	T	T	T	S	.
93		Q	M	E	.	.	.	.	B	.	.	.	.	.	T	T	T	.	.
94		Y	M	E	.	.	.	E	B	.	.	.	.	.	T	T	T	S	S
95		T	M	E	.	.	E	E	.	.	.	.	.	.	T	T	T	.	.
96		G	M	.	.	.	E	.	.	.	.	.	.	.	T	T	T	.	.
97		A	M	.	.	.	.	.	.	.	.	.	.	.	T	T	T	.	.
98		F	M	.	.	.	.	.	.	.	.	.	.	.	T	T	T	.	S
99		F	M	.	.	.	.	.	.	.	.	.	.	B	T	T	T	.	S
100		A	M	.	.	.	.	.	B	.	.	.	.	.	T	T	T	.	.
101		A	M	.	.	.	.	.	B	.	.	.	.	.	T	T	T	.	.
102		A	M	.	.	.	.	.	B	.	.	.	.	.	T	T	T	.	.
103		V	M	.	.	.	.	.	B	.	.	.	.	.	T	T	T	.	.
104		V	M	.	.	.	.	.	B	.	.	.	.	.	T	T	T	S	.
105		F	M	.	.	.	.	.	B	.	.	.	.	B	T	T	T	S	S
106		A	M	.	.	.	.	.	B	.	.	.	.	B	T	T	T	.	.
107		I	M	.	.	.	.	.	B	.	.	.	.	B	T	T	T	S	.
108		Y	M	E	.	.	.	.	.	.	.	.	.	.	T	T	T	S	S
109		R	o	.	E	.	E	.	.	.	.	.	.	B	T	T	T	.	.
110		D	o	E	E	.	E	.	.	.	.	.	.	B	T	T	T	.	.
111		A	o	E	.	.	.	E	.	.	.	.	.	B	T	.	T	.	.
112		I	o	.	.	.	.	E	.	B	.	.	.	B	T	.	T	.	S
113		D	o	.	E	.	.	E	.	B	B	.	.	B	T	.	T	.	.
114		A	o	.	E	.	.	E	B	B	B	.	.	B	T	.	T	.	.
115		V	o	E	.	E	E	E	.	B	B	.	.	B	T	.	T	S	S
116		D	o	.	E	E	E	E	B	B	B	.	B	B	T	.	.	.	.
117		S	o	.	E	E	E	E	B	B	B	.	.	B	T	.	.	.	.
118		G	o	.	E	E	E	E	B	B	.	.	.	B	T	.	.	.	.
119		V	o	.	.	E	E	E	B	B	.	.	.	B	T	.	T	S	S
120		R	o	.	E	.	E	.	B	B	B	.	B	B	T	.	T	.	S
121		S	o	.	.	E	E	.	B	B	.	.	B	B	T	.	T	.	.
122		V	o	.	.	E	E	.	.	B	B	.	B	.	T	.	T	S	S
123		L	o	.	.	E	E	E	.	B	B	.	.	B	T	.	T	S	S
124		G	o	.	.	.	E	E	.	B	B	.	.	B	T	.	T	.	.
125		P	o	.	E	E	E	E	.	B	B	.	.	B	T	.	T	.	.
126	O-gly	T	o	E	E	E	E	.	.	B	B	.	.	B	T	.	T	.	.
127		G	o	.	.	E	E	E	.	B	B	.	.	.	T	.	T	.	.
128	O-gly	T	o	.	.	E	E	E	.	B	B	.	.	.	T	.	T	.	.
129		A	o	.	.	.	E	.	.	B	B	.	.	.	T	.	T	S	.
130		P	o	.	.	.	.	.	.	.	B	B	.	.	T	.	T	.	.
131		I	o	.	.	.	.	.	.	.	B	B	.	.	T	.	T	S	.
132		F	o	.	.	.	.	.	B	.	B	B	.	.	T	.	T	S	S
133		A	o	.	.	.	.	.	B	B	.	B	.	.	T	.	T	.	.
134		T	o	.	.	.	.	.	.	B	B	B	.	.	T	.	T	.	.
135		Y	o	E	.	.	E	E	.	B	B	B	B	.	T	.	T	S	.
136		P	o	E	.	E	E	.	.	B	B	B	B	.	T	.	T	.	.
137		R	o	E	.	E	E	E	.	B	B	B	B	B	T	.	T	S	.
138		E	o	E	E	E	E	E	.	B	B	B	.	B	T	.	T	.	.
139		G	o	E	E	.	E	E	.	B	B	B	.	B	T	.	T	.	.
140		I	M	.	.	.	E	E	.	B	B	B	.	B	T	.	T	.	S
141		S	M	.	.	.	E	E	.	B	.	B	.	B	T	.	T	.	.
142		T	M	.	.	E	E	.	B	.	.	B	.	B	T	.	T	.	.
143		L	M	.	.	.	E	.	B	.	.	B	B	B	T	.	T	S	S
144		T	M	.	.	.	.	.	B	.	.	B	B	B	T	.	.	.	.
145		C	M	.	.	.	.	.	B	.	.	B	.	.	T	.	.	.	S
146		F	M	.	.	.	.	.	B	.	.	B	B	B	T	.	.	.	S
147		I	M	.	.	.	.	.	B	.	.	B	B	B	.	.	.	.	S
148		D	M	.	.	.	E	.	B	.	.	B	B	.	.	.	.	.	.
149		Q	M	.	.	.	E	.	B	.	.	B	B	.	.	.	.	.	.
150		V	M	E	.	.	E	E	B	.	.	B	B	.	.	.	.	S	.
151		V	M	.	.	.	E	E	.	.	.	B	.	.	.	.	.	.	S
152		T	M	.	.	.	E	.	B	.	.	B	B	.	.	.	.	.	.
153		T	M	.	.	.	E	.	.	.	.	B	B	.	.	.	.	.	.
154		G	M	.	.	.	E	.	.	.	.	.	B	.	.	.	.	S	.
155		C	M	.	.	.	.	.	B	.	.	.	B	.	.	.	.	.	.
156		L	M	.	.	.	.	.	B	.	.	.	B	.	.	.	.	S	S
157		V	M	.	.	.	.	.	B	.	.	.	.	.	.	.	.	.	S
158		L	M	.	.	.	.	.	.	.	.	.	.	.	.	.	.	S	S
159		T	M	.	.	.	.	.	.	.	.	.	.	.	.	.	.	.	.
160		A	M	.	.	.	.	.	B	.	.	B	.	.	.	.	.	.	.
161		E	M	.	.	.	.	.	.	.	.	B	.	.	T	.	.	.	.
162		A	M	E	.	.	.	E	.	.	B	B	.	B	T	.	.	.	.
163		I	i	E	.	.	E	E	.	.	B	B	.	.	T	.	.	.	.
164		T	i	E	.	.	E	E	.	.	B	B	B	.	T	.	.	.	.
165		D	i	.	.	E	E	E	.	.	B	B	B	B	T	.	.	.	.
166		P	i	E	E	E	E	E	.	B	B	B	.	B	T	.	.	.	.
167		R	i	E	E	.	E	E	.	B	B	B	B	B	T	.	.	S	.
168		N	i	E	E	E	E	E	.	B	B	B	.	B	T	.	.	.	.
169		F	M	.	E	E	E	.	.	B	B	B	.	B	T	.	.	.	S
170		G	M	.	E	E	E	.	.	B	B	B	.	B	T	.	.	.	.
171		G	M	.	E	.	E	E	.	B	B	B	.	B	T		T	.	.
172		L	M	.	E	E	E	.	.	B	B	B	.	B	T	.	T	.	.
173		P	M	E	E	E	E	.	.	B	B	B	.	B	T	.	T	.	.
174		K	M	E	E	E	E	.	B	B	B	B	.	B	T	.	T	S	.
175		P	M	E	.	E	E	.	B	B	B	B	B	B	T	.	T	.	.
176		F	M	E	.	E	E	.	B	.	.	.	B	B	T	T	T	.	S
177		Y	M	E	.	E	.	.	B	.	.	.	.	B	T	T	T	S	.
178		P	M	.	.	.	.	.	B	.	.	.	.	.	T	T	T	.	.
179		L	M	.	.	.	.	.	B	.	.	.	.	B	T	T	T	S	S
180		A	M	.	.	.	.	.	.	.	.	.	.	.	T	T	T	S	.
181		L	M	.	.	.	.	.	B	.	.	.	.	.	T	T	T	S	S
182		G	M	.	.	.	.	.	B	.	.	.	.	.	T	T	T	.	.
183		L	M	.	E	.	.	.	B	.	.	.	.	B	T	T	T	S	S
184		M	M	.	.	.	.	.	B	.	.	.	.	.	T	T	T	.	.
185		I	M	.	.	.	.	.	.	.	.	.	.	.	T	T	T	S	S
186		S	M	.	.	.	.	.	.	.	.	.	.	.	T	T	.	.	.
187		A	M	.	.	.	.	.	.	.	.	.	.	.	T	T	.	.	.
188		E	M	.	.	.	.	.	.	.	.	.	.	.	T	T	.	.	.
189		I	M	.	.	.	.	.	.	.	.	.	.	.	T	T	.	.	.
190		F	M	.	.	.	.	.	.	.	.	.	.	B	T	T	T	S	S
191		A	M	.	.	.	.	.	.	.	.	.	.	B	T	T	T	.	.
192		F	o	.	.	.	.	.	.	.	.	.	.	.	T	T	T	S	S
193		S	o	.	.	E	.	.	B	.	.	.	B	.	T	T	T	.	.
194		Y	o	.	.	E	.	.	.	.	.	.	B	B	T	T	T	S	S
195		N	o	.	.	E	.	.	.	.	.	.	B	.	T	T	T	.	.
196		C	o	.	.	E	.	E	.	.	.	.	.	.	T	T	T	.	.
197		M	o	.	.	E	.	.	B	.	.	.	.	.	T	T	T	.	S
198		A	o	.	.	E	.	.	.	.	.	.	.	.	T	T	T	.	.
199		P	o	.	.	E	.	.	B	.	.	.	.	.	T	T	T	.	.
200		L	o	E	.	E	E	.	.	.	B	.	.	.	T	T	T	S	S
201		N	o	E	.	E	E	E	.	.	B	.	.	.	T	.	T	.	.
202		P	o	E	.	.	E	E	.	.	B	B	B	.	T	.	T	.	.
203		A	o	E	.	E	E	.	.	.	B	B	.	.	T	.	T	.	.
204		R	o	E	.	E	E	E	.	.	B	B	.	.	T	.	T	.	.
205		D	o	E	.	.	E	E	.	.	B	B	.	.	T	.	.	.	.
206		L	o	E	.	E	E	E	.	.	B	B	B	.	T	.	.	S	S
207		G	o	.	.	E	E	.	.	.	B	B	.	.	T	.	.	.	.
208		P	o	.	.	E	E	.	B	.	.	B	.	.	T	.	.	.	.
209		R	o	E	.	.	E	.	B	.	.	B	.	.	T	.	.	.	.
210		V	o	E	.	.	.	.	.	.	.	B	.	.	T	.	.	.	.
211		F	o	.	.	.	.	.	B	.	.	B	.	.	T	.	.	S	S
212		T	o	.	.	.	.	.	B	.	.	B	.	.	T	.	.	.	.
213		A	o	.	.	.	.	.	B	.	.	B	.	B	T	.	.	S	.
214		I	o	.	.	.	.	.	.	.	.	B	.	B	T	.	.	S	S
215		A	o	.	.	.	.	.	.	.	.	B	.	B	T	.	.	S	.
216		G	o	.	E	.	.	.	.	.	.	B	.	B	T	.	.	.	.
217		W	o	.	.	.	.	.	.	.	.	B	.	.	T	.	.	S	S
218		G	o	.	E	.	.	.	.	B	.	B	.	B	T	.	.	.	.
219		M	o	.	E	.	.	.	.	B	.	B	.	B	T	.	.	.	S
220		E	o	.	E	.	.	.	.	B	.	B	.	B	T	.	.	.	.
221		V	o	.	.	.	.	.	.	B	.	B	.	.	T	.	.	S	.
222		F	o	.	.	.	.	.	.	B	.	B	.	B	T	.	.	.	S
223		S	o	.	E	.	.	.	B	B	.	B	.	B	T	.	.	.	.
224		V	o	E	E	.	E	.	.	B	.	B	B	B	T	.	.	.	S
225		R	o	E	E	.	E	.	.	B	.	B	B	B	T	.	.	.	.
226		D	o	E	E	.	E	.	B	B	.	B	.	B	T	T	T	.	.
227		Y	o	E	.	.	.	.	.	B	.	B	.	B	T	T	T	.	S
228		V	M	.	.	.	.	.	.	.	.	B	.	B	T	T	T	.	.
229		W	M	.	.	.	.	.	B	.	.	B	B	.	T	T	T	S	S
230		M	M	.	.	.	.	.	B	.	.	B	B	.	T	T	T	.	S
231		F	M	.	.	.	.	.	B	.	.	B	B	B	T	T	T	.	S
232		V	M	.	.	.	.	.	B	.	.	B	.	.	T	T	T	.	.
233		P	M	.	.	.	.	.	B	.	.	B	.	.	T	T	T	.	.
234		I	M	.	.	.	.	.	.	.	.	B	.	.	T	T	T	S	.
235		F	M	.	.	.	.	.	B	.	.	B	.	.	T	T	T	S	S
236		A	M	.	.	.	.	.	B	.	.	B	.	.	T	T	T	.	.
237		P	M	.	.	.	.	.	B	.	.	B	.	.	T	T	T	.	.
238		H	M	.	.	.	.	.	B	.	.	B	.	.	T	T	T	.	.
239		V	M	.	.	E	.	E	B	.	.	B	.	.	T	T	T	S	S
240		G	M	.	.	E	E	.	B	.	.	B	B	.	T	T	T	.	.
241		G	M	.	.	E	E	.	B	.	.	B	B	.	T	T	T	.	.
242		V	M	.	.	.	.	.	.	.	.	B	.	.	T	T	T	.	S
243		L	M	.	.	E	.	.	.	.	.	B	.	B	T	T	T	S	S
244		G	M	.	.	.	.	.	.	.	.	B	.	.	T	T	T	.	.
245		A	M	.	.	.	.	.	B	.	.	B	.	.	T	T	T	.	.
246		W	M	E	E	.	.	.	.	.	.	B	.	B	T	.	.	.	S
247		T	M	E	.	.	.	.	.	.	.	B	.	B	T	.	.	.	.
248		Y	i	.	.	.	.	.	B	.	.	B	.	B	T	.	.	S	S
249		K	i	.	E	.	.	.	B	.	.	B	B	B	T	.	.	S	.
250		V	i	.	.	.	.	E	B	.	.	B	B	B	.	.	.	S	S
251		C	i	.	.	.	.	E	B	.	.	B	B	B	.	.	.	.	.
252		V	i	.	.	.	E	.	B	.	.	B	.	B	.	.	.	S	S
253		E	i	.	E	.	E	E	B	B	.	B	.	B	.	.	.	.	.
254		D	i	E	E	E	E	E	.	B	B	B	B	B	.	.	.	.	.
255		N	i	E	E	E	E	.	.	B	B	B	B	B	T	.	.	.	.
256		W	i	E	.	E	E	E	.	B	B	B	B	B	T	.	.	.	S
257		P	i	.	E	E	E	E	.	B	B	B	B	.	T	.	.	.	.
258		E	i	E	E	E	E	E	.	B	B	.	B	.	T	.	.	.	.
259		E	i	.	E	E	E	E	.	B	B	.	B	.	T	.	.	.	.
260		E	i	E	E	.	E	E	.	B	B	.	B	.	T	.	.	.	.
261		P	i	E	E	.	E	E	.	B	B	.	B	.	T	.	.	.	.
262		T	i	.	E	.	E	.	B	B	B	.	.	.	T	.	.	.	.
263		V	i	.	E	.	.	.	B	B	B	.	B	.	T	.	.	.	.
264		I	i	.	E	.	.	.	B	B	.	.	B	.	T	.	.	S	.
265		L	i	.	.	.	.	.	B	B	.	.	B	.	T	.	.	S	.
266		P	i	.	E	.	.	.	B	B	.	.	B	.	T	.	.	.	.
267		V	i	.	E	.	E	.	B	B	.	.	B	.	T	.	.	S	S
268		S	i	E	E	E	E	E	.	B	B	.	B	.	T	.	.	.	.
269		T	i	E	E	E	E	E	.	B	B	.	B	.	T	.	.	.	.
270		S	i	E	E	E	E	E	.	B	B	.	B	.	T	.	.	.	.
271		K	i	E	E	E	E	E	.	B	B	.	B	.	T	.	.	S	.
272		N	i	E	E	E	E	E	.	B	B	.	B	.	T	.	.	.	.
273		S	i	E	E	E	E	E	.	B	B	E	B	.	T	.	.	.	.
274		E	i	E	E	E	E	.	.	B	B	E	B	.	T	.	.	.	.
275		L	i	E	E	E	E	E	.	B	B	E	.	.	T	.	.	S	S
276		G	i	E	E	.	E	E	.	B	B	E	.	.	T	.	.	.	.
277		T	i	.	E	.	E	E	.	B	B	E	.	.	T	.	.	.	.
278		T	i	E	E	.	E	E	.	B	B	E	.	.	T	.	.	.	.
279		A	i	E	E	.	E	E	.	B	B	E	B	.	T	.	.	.	.
280		S	i	.	E	.	E	E	.	B	B	E	.	.	T	.	.	.	.
281		A		E	E	.	E	E	.	B	.	E	.	.	T	.	.	S	.
282		E		.	E	.	.	.	.	B	.	E	.	.	T	.	.	.	.
283		M		.	E	.	.	.	.	B	.	E	.	.	T	.	.	S	S
284		N		.	E	.	.	.	.	.	.	E	.	.	T	.	.	.	.
285		I		.	.	.	.	.	.	.	.	E	.	.	T	.	.	S	.
286		L		.	E	.	.	.	B	.	.	E	.	.	T	.	.	S	S
287		F		.	.	E	.	.	.	.	.	E	.	.	T	.	.	S	S
288		S		.	E	E	.	.	B	.	.	E	B	.	T	.	.	.	.
289		C		.	.	E	E	E	B	.	.	.	B	.	T	.	.	.	.
290		D		.	E	E		E	.	.	.	.	B	.	.	.	.	.	.
291		S			E					.	.	.	B	.	.	.	.	.	.
292		C			E					.	.	.	.	.	.	.	.	.	.
293		V			E					.	.	.	.	.	.	.	.	S	S

## Sheet: Figure Om22982
		Position	1									10										20										30										40
Structure and exposure	Structure and exposure	Sequence	M	K	I	Q	S	T	F	V	R	E	L	I	N	E	F	L	G	T	F	T	L	I	V	F	G	D	S	V	M	A	I	I	I	A	G	R	Q	E	H	N	A	G	I	I	G	P	V
		TMHMM	i	i	i	i	i	i	i	i	i	i	M	M	M	M	M	M	M	M	M	M	M	M	M	M	M	M	M	M	M	M	M	M	M	o	o	o	o	o	o	o	o	o	M	M	M	M	M
		Emini (accesibility)			E	E	.	E	E	.	.	.	E	.	.	.	E	.	.	.	.	.	.	.	.	.	.	.	.	.	.	.	.	.	.	.	E	E	E	E	E	.	.	.	.	.	.	.	.
		BepiPred 2.0 (surface)	E	E	E	E	E	E	.	.	.	.	.	.	.	.	.	.	.	.	.	.	.	.	.	.	.	.	.	.	.	.	.	.	.	.	E	E	E	E	E	.	.	.	.	.	.	.	E
		Chou & Fasman (turns)				.	.	.	.	.	.	.	.	.	.	.	.	.	.	.	.	.	.	.	.	.	.	.	.	.	.	.	.	.	.	.	.	.	E	E	E	.	.	E	E	.	E	E	E
		Karplus & Scoultz (flexibility)				E	E	E	E	E	E	E	E	.	.	E	E	E	E	E	.	.	.	.	.	.	E	E	E	.	.	.	.	.	.	.	E	E	E	E	E	E	.	.	.	.	E	E	E
		Parker (hydrophilicity)				.	.	.	.	.	.	.	.	.	.	.	.	.	.	.	.	.	.	.	.	.	.	.	E	.	.	.	.	.	.	.	.	E	E	E	E	E	E	.	.	.	.	.	.
B cell epitopes	Linear and discontinuous B cell epitopes	Kolaskar & Tongaonkar				.	.	B	.	.	B	.	.	.	.	.	.	.	.	.	B	B	B	B	B	.	B	B	.	.	B	B	B	.	.	.	.	.	.	.	.	.	.	.	.	.	.	B	.
		BepiPred 2.0	.	.	.	.	.	.	.	.	.	.	.	.	.	.	.	.	.	.	.	.	.	.	.	.	.	.	.	.	.	.	.	.	.	B	B	B	B	B	B	B	B	.	.	.	.	.	.
		BepiPred 1.0	.	.	.	.	.	.	.	.	.	.	.	.	.	.	.	.	.	.	.	.	.	.	.	.	.	.	.	.	.	.	.	.	.	.	.	.	B	B	B	B	B	B	.	B	.	B	B
		ABCpred	.	.	.	.	.	.	.	.	.	.	.	.	.	.	.	.	.	.	.	.	.	.	.	.	.	.	.	.	.	B	B	B	B	B	B	B	B	B	B	B	B	B	B	B	B	B	B
		BcePred	.	.	.	.	.	.	.	.	.	.	B	B	.	.	.	.	.	.	.	.	B	B	.	B	B	.	.	.	.	.	.	.	.	.	.	B	B	B	B	B	.	.	.	.	.	.	.
		ElliPro (discontinuous)	.	.	.	.	B	B	B	B	B	B	B	B	B	.	.	B	.	.	.	.	.	.	.	.	.	.	.	.	.	.	B	B	.	B	B	B	B	B	B	B	B	.	B	B	.	.	.
T cell epitopes	T cell epitopes	MHC I IEDB Pig	.	.	T	T	T	T	T	T	T	T	T	T	T	T	T	T	T	T	T	T	T	T	T	T	T	T	T	T	T	T	T	T	.	.	T	T	T	T	T	T	T	T	T	T	T	T	T
		MHC II IEDB Human	T	T	T	T	T	T	T	T	T	T	T	T	T	T	T	T	T	T	T	T	T	T	T	T	T	T	T	T	T	T	T	T	T	T	T	.	.	.	.	.	.	.	.	.	.	.	.
		MHC II IEDB Mouse	.	.	.	.	.	.	.	.	.	.	.	.	.	.	.	.	.	.	.	.	.	.	.	.	.	.	.	.	.	.	.	.	.	.	.	.	.	.	.	.	.	.	.	.	.	.	.
Proteasomal processing	Proteasomal processing	NetChop	S	.	S	.	.	.	S	S	.	.	S	.	.	.	S	.	.	.	S	.	S	S	S	.	.	.	.	.	.	.	.	.	S	.	.	S	.	.	.	.	.	.	S	.	.	.	.
		PCPS	S	.	.	.	.	.	S	S	.	.	S	S	.	.	S	S	.	.	S	.	S	.	.	S	.	.	.	.	S	.	.	.	S	.	.	.	.	.	.	.	.	.	.	S	.	.	S
		Antigenic peptides																																		Om22982_A
					Key Om22982:
					o (outside), extracellular; M, transmembrane; i, intracellular
					E, exposed on surface, predicted turns, hydrophilic
					F, predicted turns and flexibility
					B, B-cell epitope
					T, T-cell epitope
					S, predicted proteasome cut site
[truncated: 246 more columns]

## Sheet: TMHMM
TMHMM result
# Om22982 Length: 293
# Om22982 Number of predicted TMHs: 6
# Om22982 Exp number of AAs in TMHs: 128.19909
# Om22982 Exp number, first 60 AAs: 38.4573
# Om22982 Total prob of N-in: 0.72666
# Om22982 POSSIBLE N-term signal sequence
Om22982	TMHMM2.0	inside	1	10
Om22982	TMHMM2.0	TMhelix	11	33
Om22982	TMHMM2.0	outside	34	42
Om22982	TMHMM2.0	TMhelix	43	65
Om22982	TMHMM2.0	inside	66	85
Om22982	TMHMM2.0	TMhelix	86	108
Om22982	TMHMM2.0	outside	109	139
Om22982	TMHMM2.0	TMhelix	140	162
Om22982	TMHMM2.0	inside	163	168
Om22982	TMHMM2.0	TMhelix	169	191
Om22982	TMHMM2.0	outside	192	227
Om22982	TMHMM2.0	TMhelix	228	247
Om22982	TMHMM2.0	inside	248	293

## Sheet: Emini (accesibility)
Position	Residue	Start	End	Peptide	Score
3	I	1	6	MKIQST	1745
4	Q	2	7	KIQSTF	1527
5	S	3	8	IQSTFV	0.567
6	T	4	9	QSTFVR	1583
7	F	5	10	STFVRE	1583
8	V	6	11	TFVREL	0.974
9	R	7	12	FVRELI	0.473
10	E	8	13	VRELIN	0.879
11	L	9	14	RELINE	2051
12	I	10	15	ELINEF	0.907
13	N	11	16	LINEFL	0.432
14	E	12	17	INEFLG	0.518
15	F	13	18	NEFLGT	1067
16	L	14	19	EFLGTF	0.574
17	G	15	20	FLGTFT	0.479
18	T	16	21	LGTFTL	0.456
19	F	17	22	GTFTLI	0.387
20	T	18	23	TFTLIV	0.291
21	L	19	24	FTLIVF	0.174
22	I	20	25	TLIVFG	0.199
23	V	21	26	LIVFGD	0.231
24	F	22	27	IVFGDS	0.375
25	G	23	28	VFGDSV	0.397
26	D	24	29	FGDSVM	0.529
27	S	25	30	GDSVMA	0.617
28	V	26	31	DSVMAI	0.437
29	M	27	32	SVMAII	0.183
30	A	28	33	VMAIII	0.096
31	I	29	34	MAIIIA	0.131
32	I	30	35	AIIIAG	0.131
33	I	31	36	IIIAGR	0.253
34	A	32	37	IIAGRQ	0.626
35	G	33	38	IAGRQE	1546
36	R	34	39	AGRQEH	3001
37	Q	35	40	GRQEHN	4777
38	E	36	41	RQEHNA	4876
39	H	37	42	QEHNAG	2464
40	N	38	43	EHNAGI	0.997
41	A	39	44	HNAGII	0.404
42	G	40	45	NAGIIG	0.294
43	I	41	46	AGIIGP	0.282
44	I	42	47	GIIGPV	0.207
45	G	43	48	IIGPVG	0.207
46	P	44	49	IGPVGW	0.311
47	V	45	50	GPVGWG	0.439
48	G	46	51	PVGWGT	0.64
49	W	47	52	VGWGTA	0.418
50	G	48	53	GWGTAI	0.395
51	T	49	54	WGTAIF	0.346
52	A	50	55	GTAIFC	0.176
53	I	51	56	TAIFCA	0.18
54	F	52	57	AIFCAV	0.093
55	C	53	58	IFCAVT	0.132
56	A	54	59	FCAVTV	0.14
57	V	55	60	CAVTVS	0.217
58	T	56	61	AVTVSG	0.4
59	V	57	62	VTVSGG	0.392
60	S	58	63	TVSGGV	0.392
61	G	59	64	VSGGVS	0.364
62	G	60	65	SGGVSA	0.495
63	V	61	66	GGVSAH	0.503
64	S	62	67	GVSAHL	0.419
65	A	63	68	VSAHLN	0.681
66	H	64	69	SAHLNP	1419
67	L	65	70	AHLNPA	1069
68	N	66	71	HLNPAV	0.786
69	P	67	72	LNPAVT	0.833
70	A	68	73	NPAVTL	0.833
71	V	69	74	PAVTLA	0.523
72	T	70	75	AVTLAL	0.279
73	L	71	76	VTLALA	0.279
74	A	72	77	TLALAS	0.504
75	L	73	78	LALASV	0.259
76	A	74	79	ALASVK	0.629
77	S	75	80	LASVKK	1244
78	V	76	81	ASVKKF	1307
79	K	77	82	SVKKFP	2.0
80	K	78	83	VKKFPI	1046
81	F	79	84	KKFPIK	2819
82	P	80	85	KFPIKK	2819
83	I	81	86	FPIKKV	1046
84	K	82	87	PIKKVP	1868
85	K	83	88	IKKVPL	0.996
86	V	84	89	KKVPLF	1231
87	P	85	90	KVPLFF	0.533
88	L	86	91	VPLFFV	0.198
89	F	87	92	PLFFVA	0.269
90	F	88	93	LFFVAQ	0.302
91	V	89	94	FFVAQY	0.573
92	A	90	95	FVAQYT	0.955
93	Q	91	96	VAQYTG	1091
94	Y	92	97	AQYTGA	1485
95	T	93	98	QYTGAF	1273
96	G	94	99	YTGAFF	0.637
97	A	95	100	TGAFFA	0.41
98	F	96	101	GAFFAA	0.287
99	F	97	102	AFFAAA	0.293
100	A	98	103	FFAAAV	0.215
101	A	99	104	FAAAVV	0.185
102	A	100	105	AAAVVF	0.185
103	V	101	106	AAVVFA	0.185
104	V	102	107	AVVFAI	0.128
105	F	103	108	VVFAIY	0.199
106	A	104	109	VFAIYR	0.524
107	I	105	110	FAIYRD	1.18
108	Y	106	111	AIYRDA	1377
109	R	107	112	IYRDAI	0.955
110	D	108	113	YRDAID	2276
111	A	109	114	RDAIDA	1467
112	I	110	115	DAIDAV	0.556
113	D	111	116	AIDAVD	0.556
114	A	112	117	IDAVDS	0.738
115	V	113	118	DAVDSG	1041
116	D	114	119	AVDSGV	0.463
117	S	115	120	VDSGVR	0.897
118	G	116	121	DSGVRS	1.62
119	V	117	122	SGVRSV	0.72
120	R	118	123	GVRSVL	0.443
121	S	119	124	VRSVLG	0.443
122	V	120	125	RSVLGP	0.923
123	L	121	126	SVLGPT	0.68
124	G	122	127	VLGPTG	0.502
125	P	123	128	LGPTGT	0.977
126	T	124	129	GPTGTA	1196
127	G	125	130	PTGTAP	1.87
128	T	126	131	TGTAPI	0.848
129	A	127	132	GTAPIF	0.509
130	P	128	133	TAPIFA	0.519
131	I	129	134	APIFAT	0.519
132	F	130	135	PIFATY	0.805
133	A	131	136	IFATYP	0.805
134	T	132	137	FATYPR	2.25
135	Y	133	138	ATYPRE	4499
136	P	134	139	TYPREG	4407
137	R	135	140	YPREGI	2141
138	E	136	141	PREGIS	1831
139	G	137	142	REGIST	1709
140	I	138	143	EGISTL	0.72
141	S	139	144	GISTLT	0.6
142	T	140	145	ISTLTC	0.325
143	L	141	146	STLTCF	0.401
144	T	142	147	TLTCFI	0.21
145	C	143	148	LTCFID	0.243
146	F	144	149	TCFIDQ	0.51
147	I	145	150	CFIDQV	0.262
148	D	146	151	FIDQVV	0.363
149	Q	147	152	IDQVVT	0.605
150	V	148	153	DQVVTT	1246
151	V	149	154	QVVTTG	0.738
152	T	150	155	VVTTGC	0.229
153	T	151	156	VTTGCL	0.254
154	G	152	157	TTGCLV	0.254
155	C	153	158	TGCLVL	0.145
156	L	154	159	GCLVLT	0.145
157	V	155	160	CLVLTA	0.148
158	L	156	161	LVLTAE	0.479
159	T	157	162	VLTAEA	0.586
160	A	158	163	LTAEAI	0.554
161	E	159	164	TAEAIT	0.969
162	A	160	165	AEAITD	1121
163	I	161	166	EAITDP	1716
164	T	162	167	AITDPR	1941
165	D	163	168	ITDPRN	3.09
166	P	164	169	TDPRNF	3817
167	R	165	170	DPRNFG	2617
168	N	166	171	PRNFGG	1551
169	F	167	172	RNFGGL	0.827
170	G	168	173	NFGGLP	0.653
171	G	169	174	FGGLPK	0.812
172	L	170	175	GGLPKP	1.45
173	P	171	176	GLPKPF	1269
174	K	172	177	LPKPFY	2009
175	P	173	178	PKPFYP	3767
176	F	174	179	KPFYPL	2009
177	Y	175	180	PFYPLA	1015
178	P	176	181	FYPLAL	0.541
179	L	177	182	YPLALG	0.619
180	A	178	183	PLALGL	0.326
181	L	179	184	LALGLM	0.208
182	G	180	185	ALGLMI	0.177
183	L	181	186	LGLMIS	0.235
184	M	182	187	GLMISA	0.288
185	I	183	188	LMISAE	0.504
186	S	184	189	MISAEI	0.428
187	A	185	190	ISAEIF	0.375
188	E	186	191	SAEIFA	0.54
189	I	187	192	AEIFAF	0.349
190	F	188	193	EIFAFS	0.463
191	A	189	194	IFAFSY	0.419
192	F	190	195	FAFSYN	0.96
193	S	191	196	AFSYNC	0.595
194	Y	192	197	FSYNCM	0.582
195	N	193	198	SYNCMA	0.68
196	C	194	199	YNCMAP	0.784
197	M	195	200	NCMAPL	0.413
198	A	196	201	CMAPLN	0.413
199	P	197	202	MAPLNP	1.19
200	L	198	203	APLNPA	1215
201	N	199	204	PLNPAR	2356
202	P	200	205	LNPARD	2544
203	A	201	206	NPARDL	2544
204	R	202	207	PARDLG	1566
205	D	203	208	ARDLGP	1566
206	L	204	209	RDLGPR	3036
207	G	205	210	DLGPRV	1.15
208	P	206	211	LGPRVF	0.596
209	R	207	212	GPRVFT	1044
210	V	208	213	PRVFTA	1066
211	F	209	214	RVFTAI	0.483
212	T	210	215	VFTAIA	0.249
213	A	211	216	FTAIAG	0.332
214	I	212	217	TAIAGW	0.403
215	A	213	218	AIAGWG	0.277
216	G	214	219	IAGWGM	0.271
217	W	215	220	AGWGME	0.669
218	G	216	221	GWGMEV	0.492
219	M	217	222	WGMEVF	0.43
220	E	218	223	GMEVFS	0.549
221	V	219	224	MEVFSV	0.411
222	F	220	225	EVFSVR	0.814
223	S	221	226	VFSVRD	0.785
224	V	222	227	FSVRDY	1658
225	R	223	228	SVRDYV	1421
226	D	224	229	VRDYVW	1115
227	Y	225	230	RDYVWM	1486
228	V	226	231	DYVWMF	0.657
229	W	227	232	YVWMFV	0.292
230	M	228	233	VWMFVP	0.288
231	F	229	234	WMFVPI	0.272
232	V	230	235	MFVPIF	0.224
233	P	231	236	FVPIFA	0.229
234	I	232	237	VPIFAP	0.409
235	F	233	238	PIFAPH	0.749
236	A	234	239	IFAPHV	0.36
237	P	235	240	FAPHVG	0.508
238	H	236	241	APHVGG	0.58
239	V	237	242	PHVGGV	0.426
240	G	238	243	HVGGVL	0.227
241	G	239	244	VGGVLG	0.165
242	V	240	245	GGVLGA	0.225
243	L	241	246	GVLGAW	0.239
244	G	242	247	VLGAWT	0.349
245	A	243	248	LGAWTY	0.736
246	W	244	249	GAWTYK	1785
247	T	245	250	AWTYKV	1339
248	Y	246	251	WTYKVC	0.71
249	K	247	252	TYKVCV	0.501
250	V	248	253	YKVCVE	0.602
251	C	249	254	KVCVED	0.641
252	V	250	255	VCVEDN	0.516
253	E	251	256	CVEDNW	0.731
254	D	252	257	VEDNWP	2107
255	N	253	258	EDNWPE	4917
256	W	254	259	DNWPEE	4917
257	P	255	260	NWPEEE	5.1
258	E	256	261	WPEEEP	4903
259	E	257	262	PEEEPT	6.73
260	E	258	263	EEEPTV	3231
261	P	259	264	EEPTVI	1308
262	T	260	265	EPTVIL	0.623
263	V	261	266	PTVILP	0.556
264	I	262	267	TVILPV	0.267
265	L	263	268	VILPVS	0.248
266	P	264	269	ILPVST	0.482
267	V	265	270	LPVSTS	0.921
268	S	266	271	PVSTSK	2234
269	T	267	272	VSTSKN	2323
270	S	268	273	STSKNS	4194
271	K	269	274	TSKNSE	5421
272	N	270	275	SKNSEL	3097
273	S	271	276	KNSELG	2287
274	E	272	277	NSELGT	1651
275	L	273	278	SELGTT	1481
276	G	274	279	ELGTTA	1117
277	T	275	280	LGTTAS	0.864
278	T	276	281	GTTASA	1059
279	A	277	282	TTASAE	1852
280	S	278	283	TASAEM	1.27
281	A	279	284	ASAEMN	1415
282	E	280	285	SAEMNI	0.982
283	M	281	286	AEMNIL	0.604
284	N	282	287	EMNILF	0.518
285	I	283	288	MNILFS	0.401
286	L	284	289	NILFSC	0.217
287	F	285	290	ILFSCD	0.225
288	S	286	291	LFSCDS	0.431
289	C	287	292	FSCDSC	0.28
290	D	288	293	SCDSCV	0.24

## Sheet: BepiPred 2.0 Surf
Entry	Position	AminoAcid	Exposed/ Buried	Relative Surface Accessilibity	Helix Probability	Shee tProbability	Coil Probability	Epitope Probability	Assignement
Om22982	1	M	E	0.687	0.003	0.003	0.994	0.249	.
Om22982	2	K	E	0.693	0.018	0.088	0.893	0.314777777778	.
Om22982	3	I	E	0.282	0.018	0.088	0.893	0.376777777778	.
Om22982	4	Q	E	0.521	0.018	0.047	0.935	0.413222222222	.
Om22982	5	S	E	0.456	0.430	0.016	0.555	0.465333333333	.
Om22982	6	T	E	0.549	0.859	0.002	0.139	0.469777777778	.
Om22982	7	F	B	0.178	0.859	0.002	0.139	0.454333333333	.
Om22982	8	V	B	0.073	0.970	0.001	0.029	0.452555555556	.
Om22982	9	R	B	0.207	0.970	0.001	0.029	0.439333333333	.
Om22982	10	E	B	0.261	0.988	0.000	0.012	0.423666666667	.
Om22982	11	L	B	0.052	0.988	0.000	0.012	0.392555555556	.
Om22982	12	I	B	0.105	0.988	0.000	0.012	0.372333333333	.
Om22982	13	N	B	0.077	0.988	0.000	0.012	0.368888888889	.
Om22982	14	E	B	0.098	0.988	0.000	0.012	0.345888888889	.
Om22982	15	F	B	0.122	0.988	0.000	0.012	0.327666666667	.
Om22982	16	L	B	0.2	0.988	0.000	0.012	0.320111111111	.
Om22982	17	G	B	0.117	0.988	0.000	0.012	0.308	.
Om22982	18	T	B	0.139	0.988	0.000	0.012	0.298333333333	.
Om22982	19	F	B	0.169	0.988	0.000	0.012	0.298888888889	.
Om22982	20	T	B	0.252	0.988	0.000	0.012	0.302666666667	.
Om22982	21	L	B	0.134	0.988	0.000	0.012	0.291555555556	.
Om22982	22	I	B	0.124	0.970	0.001	0.029	0.296333333333	.
Om22982	23	V	B	0.174	0.970	0.001	0.029	0.309444444444	.
Om22982	24	F	B	0.191	0.970	0.001	0.029	0.309555555556	.
Om22982	25	G	B	0.12	0.923	0.002	0.076	0.318555555556	.
Om22982	26	D	B	0.12	0.923	0.002	0.076	0.313222222222	.
Om22982	27	S	B	0.07	0.923	0.002	0.076	0.31	.
Om22982	28	V	B	0.058	0.938	0.007	0.055	0.312666666667	.
Om22982	29	M	B	0.062	0.878	0.010	0.111	0.323666666667	.
Om22982	30	A	B	0.04	0.831	0.044	0.125	0.350222222222	.
Om22982	31	I	B	0.088	0.751	0.050	0.199	0.376555555556	.
Om22982	32	I	B	0.145	0.606	0.105	0.289	0.405555555556	.
Om22982	33	I	B	0.215	0.386	0.097	0.517	0.447777777778	.
Om22982	34	A	B	0.25	0.113	0.043	0.844	0.486777777778	.
Om22982	35	G	E	0.459	0.058	0.017	0.925	0.525	E
Om22982	36	R	E	0.628	0.016	0.005	0.979	0.559111111111	E
Om22982	37	Q	E	0.509	0.018	0.019	0.964	0.581222222222	E
Om22982	38	E	E	0.515	0.058	0.017	0.925	0.587222222222	E
Om22982	39	H	E	0.367	0.053	0.004	0.942	0.577333333333	E
Om22982	40	N	B	0.215	0.109	0.005	0.886	0.556777777778	E
Om22982	41	A	B	0.225	0.321	0.003	0.675	0.522555555556	E
Om22982	42	G	B	0.154	0.782	0.003	0.215	0.488555555556	.
Om22982	43	I	B	0.142	0.878	0.010	0.111	0.455111111111	.
Om22982	44	I	B	0.121	0.878	0.010	0.111	0.442555555556	.
Om22982	45	G	B	0.141	0.938	0.007	0.055	0.432222222222	.
Om22982	46	P	B	0.102	0.970	0.001	0.029	0.414555555556	.
Om22982	47	V	E	0.282	0.970	0.001	0.029	0.405111111111	.
Om22982	48	G	B	0.211	0.970	0.001	0.029	0.401222222222	.
Om22982	49	W	B	0.286	0.970	0.001	0.029	0.400666666667	.
Om22982	50	G	B	0.241	0.970	0.001	0.029	0.398555555556	.
Om22982	51	T	E	0.329	0.970	0.001	0.029	0.381777777778	.
Om22982	52	A	B	0.195	0.970	0.001	0.029	0.364444444444	.
Om22982	53	I	B	0.183	0.975	0.003	0.022	0.337555555556	.
Om22982	54	F	B	0.168	0.938	0.007	0.055	0.332111111111	.
Om22982	55	C	B	0.225	0.938	0.007	0.055	0.328777777778	.
Om22982	56	A	B	0.128	0.911	0.033	0.057	0.327	.
Om22982	57	V	B	0.1	0.831	0.044	0.125	0.35	.
Om22982	58	T	B	0.195	0.779	0.101	0.120	0.371555555556	.
Om22982	59	V	B	0.174	0.701	0.107	0.192	0.390666666667	.
Om22982	60	S	B	0.095	0.455	0.046	0.498	0.422222222222	.
Om22982	61	G	B	0.206	0.176	0.004	0.820	0.452222222222	.
Om22982	62	G	E	0.355	0.109	0.005	0.886	0.473333333333	.
Om22982	63	V	B	0.187	0.053	0.004	0.942	0.472	.
Om22982	64	S	B	0.159	0.016	0.005	0.979	0.469	.
Om22982	65	A	B	0.195	0.016	0.005	0.979	0.459888888889	.
Om22982	66	H	B	0.101	0.018	0.019	0.964	0.422	.
Om22982	67	L	B	0.046	0.116	0.016	0.868	0.379666666667	.
Om22982	68	N	B	0.057	0.058	0.017	0.925	0.346666666667	.
Om22982	69	P	B	0.043	0.694	0.003	0.303	0.313	.
Om22982	70	A	B	0.035	0.923	0.002	0.076	0.272777777778	.
Om22982	71	V	B	0.045	0.878	0.010	0.111	0.256333333333	.
Om22982	72	T	B	0.036	0.878	0.010	0.111	0.245222222222	.
Om22982	73	L	B	0.033	0.975	0.003	0.022	0.244888888889	.
Om22982	74	A	B	0.049	0.988	0.000	0.012	0.260666666667	.
Om22982	75	L	B	0.089	0.988	0.000	0.012	0.306111111111	.
Om22982	76	A	B	0.072	0.970	0.001	0.029	0.352555555556	.
Om22982	77	S	B	0.101	0.923	0.002	0.076	0.393222222222	.
Om22982	78	V	B	0.248	0.782	0.003	0.215	0.433888888889	.
Om22982	79	K	E	0.423	0.321	0.003	0.675	0.477222222222	.
Om22982	80	K	E	0.533	0.109	0.005	0.886	0.509444444444	E
Om22982	81	F	B	0.136	0.053	0.004	0.942	0.534111111111	E
Om22982	82	P	E	0.436	0.109	0.005	0.886	0.530222222222	E
Om22982	83	I	B	0.189	0.502	0.002	0.495	0.522444444444	E
Om22982	84	K	E	0.334	0.502	0.002	0.495	0.493333333333	E
Om22982	85	K	B	0.263	0.502	0.002	0.495	0.464333333333	.
Om22982	86	V	B	0.048	0.802	0.014	0.185	0.427111111111	.
Om22982	87	P	B	0.098	0.878	0.010	0.111	0.389222222222	.
Om22982	88	L	B	0.146	0.938	0.007	0.055	0.351555555556	.
Om22982	89	F	B	0.128	0.938	0.007	0.055	0.327111111111	.
Om22982	90	F	B	0.11	0.975	0.003	0.022	0.312666666667	.
Om22982	91	V	B	0.191	0.970	0.001	0.029	0.315777777778	.
Om22982	92	A	B	0.096	0.970	0.001	0.029	0.309111111111	.
Om22982	93	Q	B	0.133	0.970	0.001	0.029	0.297	.
Om22982	94	Y	B	0.187	0.970	0.001	0.029	0.305777777778	.
Om22982	95	T	B	0.22	0.970	0.001	0.029	0.316111111111	.
Om22982	96	G	B	0.124	0.970	0.001	0.029	0.307444444444	.
Om22982	97	A	B	0.086	0.988	0.000	0.012	0.308222222222	.
Om22982	98	F	B	0.194	0.988	0.000	0.012	0.298333333333	.
Om22982	99	F	B	0.167	0.988	0.000	0.012	0.284333333333	.
Om22982	100	A	B	0.058	0.988	0.000	0.012	0.266444444444	.
Om22982	101	A	B	0.077	0.970	0.001	0.029	0.266888888889	.
Om22982	102	A	B	0.177	0.970	0.001	0.029	0.273333333333	.
Om22982	103	V	B	0.106	0.970	0.001	0.029	0.262111111111	.
Om22982	104	V	B	0.041	0.970	0.001	0.029	0.267666666667	.
Om22982	105	F	B	0.137	0.938	0.007	0.055	0.308222222222	.
Om22982	106	A	B	0.151	0.878	0.010	0.111	0.346666666667	.
Om22982	107	I	B	0.109	0.717	0.014	0.269	0.380555555556	.
Om22982	108	Y	B	0.101	0.502	0.002	0.495	0.41	.
Om22982	109	R	E	0.295	0.406	0.004	0.591	0.460777777778	.
Om22982	110	D	E	0.549	0.406	0.004	0.591	0.481888888889	.
Om22982	111	A	B	0.286	0.406	0.004	0.591	0.496666666667	.
Om22982	112	I	B	0.114	0.522	0.016	0.462	0.535888888889	E
Om22982	113	D	E	0.498	0.522	0.016	0.462	0.572333333333	E
Om22982	114	A	E	0.447	0.430	0.016	0.555	0.592111111111	E
Om22982	115	V	B	0.165	0.339	0.016	0.645	0.600111111111	E
Om22982	116	D	E	0.468	0.257	0.016	0.727	0.621666666667	E
Om22982	117	S	E	0.427	0.181	0.017	0.803	0.626222222222	E
Om22982	118	G	E	0.377	0.184	0.043	0.773	0.610777777778	E
Om22982	119	V	B	0.309	0.184	0.043	0.773	0.618777777778	E
Om22982	120	R	E	0.329	0.191	0.086	0.723	0.630888888889	E
Om22982	121	S	B	0.232	0.199	0.152	0.649	0.619222222222	E
Om22982	122	V	B	0.242	0.199	0.152	0.649	0.612444444444	E
Om22982	123	L	B	0.266	0.191	0.086	0.723	0.596333333333	E
Om22982	124	G	B	0.276	0.191	0.086	0.723	0.578555555556	E
Om22982	125	P	E	0.334	0.191	0.086	0.723	0.550777777778	E
Om22982	126	T	E	0.334	0.184	0.043	0.773	0.548444444444	E
Om22982	127	G	B	0.233	0.113	0.087	0.800	0.543555555556	E
Om22982	128	T	B	0.262	0.118	0.150	0.732	0.517	E
Om22982	129	A	B	0.187	0.113	0.087	0.800	0.495777777778	.
Om22982	130	P	B	0.242	0.052	0.084	0.864	0.481888888889	.
Om22982	131	I	B	0.11	0.064	0.216	0.721	0.469333333333	.
Om22982	132	F	B	0.077	0.069	0.386	0.545	0.468	.
Om22982	133	A	B	0.088	0.022	0.359	0.619	0.484111111111	.
Om22982	134	T	B	0.12	0.022	0.359	0.619	0.509111111111	E
Om22982	135	Y	B	0.214	0.021	0.279	0.699	0.518333333333	E
Om22982	136	P	B	0.277	0.020	0.205	0.775	0.518777777778	E
Om22982	137	R	B	0.235	0.052	0.084	0.864	0.540555555556	E
Om22982	138	E	E	0.415	0.053	0.043	0.903	0.550777777778	E
Om22982	139	G	E	0.39	0.053	0.043	0.903	0.537888888889	E
Om22982	140	I	B	0.128	0.113	0.087	0.800	0.515888888889	E
Om22982	141	S	B	0.144	0.184	0.043	0.773	0.482222222222	.
Om22982	142	T	B	0.183	0.561	0.047	0.393	0.444444444444	.
Om22982	143	L	B	0.155	0.522	0.016	0.462	0.403	.
Om22982	144	T	B	0.154	0.522	0.016	0.462	0.377	.
Om22982	145	C	B	0.087	0.622	0.015	0.363	0.364888888889	.
Om22982	146	F	B	0.089	0.831	0.044	0.125	0.343555555556	.
Om22982	147	I	B	0.172	0.878	0.010	0.111	0.328444444444	.
Om22982	148	D	B	0.174	0.938	0.007	0.055	0.325555555556	.
Om22982	149	Q	B	0.088	0.975	0.003	0.022	0.320444444444	.
Om22982	150	V	B	0.173	0.975	0.003	0.022	0.327111111111	.
Om22982	151	V	B	0.171	0.975	0.003	0.022	0.331111111111	.
Om22982	152	T	B	0.125	0.970	0.001	0.029	0.330777777778	.
Om22982	153	T	B	0.101	0.988	0.000	0.012	0.320111111111	.
Om22982	154	G	B	0.189	0.988	0.000	0.012	0.315888888889	.
Om22982	155	C	B	0.202	0.988	0.000	0.012	0.306333333333	.
Om22982	156	L	B	0.126	0.975	0.003	0.022	0.291111111111	.
Om22982	157	V	B	0.111	0.975	0.003	0.022	0.294111111111	.
Om22982	158	L	B	0.217	0.975	0.003	0.022	0.300333333333	.
Om22982	159	T	B	0.122	0.975	0.003	0.022	0.300222222222	.
Om22982	160	A	B	0.095	0.938	0.007	0.055	0.305444444444	.
Om22982	161	E	B	0.078	0.938	0.007	0.055	0.312888888889	.
Om22982	162	A	B	0.082	0.878	0.010	0.111	0.348888888889	.
Om22982	163	I	B	0.064	0.831	0.044	0.125	0.395222222222	.
Om22982	164	T	B	0.088	0.660	0.049	0.291	0.445666666667	.
Om22982	165	D	B	0.158	0.430	0.016	0.555	0.496555555556	.
Om22982	166	P	E	0.426	0.257	0.016	0.727	0.538222222222	E
Om22982	167	R	E	0.545	0.176	0.004	0.820	0.573777777778	E
Om22982	168	N	E	0.436	0.181	0.017	0.803	0.602	E
Om22982	169	F	E	0.49	0.116	0.016	0.868	0.627222222222	E
Om22982	170	G	E	0.491	0.058	0.017	0.925	0.644222222222	E
Om22982	171	G	E	0.459	0.058	0.017	0.925	0.637222222222	E
Om22982	172	L	E	0.313	0.058	0.017	0.925	0.612888888889	E
Om22982	173	P	E	0.338	0.116	0.016	0.868	0.591111111111	E
Om22982	174	K	E	0.416	0.246	0.004	0.750	0.557444444444	E
Om22982	175	P	B	0.257	0.406	0.004	0.591	0.512666666667	E
Om22982	176	F	B	0.172	0.694	0.003	0.303	0.470555555556	.
Om22982	177	Y	B	0.228	0.859	0.002	0.139	0.438222222222	.
Om22982	178	P	B	0.182	0.923	0.002	0.076	0.415	.
Om22982	179	L	B	0.242	0.970	0.001	0.029	0.389444444444	.
Om22982	180	A	B	0.266	0.970	0.001	0.029	0.371666666667	.
Om22982	181	L	B	0.22	0.988	0.000	0.012	0.347888888889	.
Om22982	182	G	B	0.246	0.988	0.000	0.012	0.325444444444	.
Om22982	183	L	E	0.331	0.988	0.000	0.012	0.312555555556	.
Om22982	184	M	B	0.2	0.988	0.000	0.012	0.322777777778	.
Om22982	185	I	B	0.219	0.988	0.000	0.012	0.332666666667	.
Om22982	186	S	B	0.197	0.988	0.000	0.012	0.347222222222	.
Om22982	187	A	B	0.235	0.970	0.001	0.029	0.342666666667	.
Om22982	188	E	B	0.219	0.970	0.001	0.029	0.341777777778	.
Om22982	189	I	B	0.174	0.970	0.001	0.029	0.334555555556	.
Om22982	190	F	B	0.167	0.923	0.002	0.076	0.349222222222	.
Om22982	191	A	B	0.168	0.878	0.010	0.111	0.369444444444	.
Om22982	192	F	B	0.103	0.802	0.014	0.185	0.380111111111	.
Om22982	193	S	B	0.073	0.694	0.003	0.303	0.385	.
Om22982	194	Y	B	0.207	0.600	0.003	0.397	0.386777777778	.
Om22982	195	N	B	0.221	0.406	0.004	0.591	0.381444444444	.
Om22982	196	C	B	0.077	0.246	0.004	0.750	0.389222222222	.
Om22982	197	M	B	0.113	0.176	0.004	0.820	0.401222222222	.
Om22982	198	A	B	0.086	0.116	0.016	0.868	0.405333333333	.
Om22982	199	P	B	0.05	0.113	0.043	0.844	0.386777777778	.
Om22982	200	L	B	0.026	0.113	0.043	0.844	0.372555555556	.
Om22982	201	N	B	0.067	0.184	0.043	0.773	0.373777777778	.
Om22982	202	P	B	0.055	0.522	0.016	0.462	0.356444444444	.
Om22982	203	A	B	0.022	0.622	0.015	0.363	0.342666666667	.
Om22982	204	R	B	0.086	0.600	0.003	0.397	0.341	.
Om22982	205	D	B	0.078	0.694	0.003	0.303	0.336333333333	.
Om22982	206	L	B	0.051	0.782	0.003	0.215	0.318333333333	.
Om22982	207	G	B	0.026	0.782	0.003	0.215	0.309111111111	.
Om22982	208	P	B	0.094	0.923	0.002	0.076	0.309444444444	.
Om22982	209	R	B	0.133	0.970	0.001	0.029	0.309	.
Om22982	210	V	B	0.07	0.923	0.002	0.076	0.312222222222	.
Om22982	211	F	B	0.04	0.923	0.002	0.076	0.325777777778	.
Om22982	212	T	B	0.116	0.878	0.010	0.111	0.354111111111	.
Om22982	213	A	B	0.128	0.802	0.014	0.185	0.379555555556	.
Om22982	214	I	B	0.176	0.622	0.015	0.363	0.405666666667	.
Om22982	215	A	B	0.114	0.430	0.016	0.555	0.436333333333	.
Om22982	216	G	E	0.312	0.257	0.016	0.727	0.476111111111	.
Om22982	217	W	B	0.23	0.257	0.016	0.727	0.506888888889	E
Om22982	218	G	E	0.428	0.176	0.004	0.820	0.531222222222	E
Om22982	219	M	E	0.448	0.181	0.017	0.803	0.557555555556	E
Om22982	220	E	E	0.563	0.181	0.017	0.803	0.569888888889	E
Om22982	221	V	B	0.275	0.116	0.016	0.868	0.587666666667	E
Om22982	222	F	B	0.211	0.058	0.017	0.925	0.588444444444	E
Om22982	223	S	E	0.472	0.058	0.017	0.925	0.576555555556	E
Om22982	224	V	E	0.521	0.058	0.017	0.925	0.566333333333	E
Om22982	225	R	E	0.451	0.018	0.019	0.964	0.550444444444	E
Om22982	226	D	E	0.373	0.018	0.019	0.964	0.531	E
Om22982	227	Y	B	0.15	0.018	0.019	0.964	0.505555555556	E
Om22982	228	V	B	0.278	0.018	0.047	0.935	0.458111111111	.
Om22982	229	W	B	0.166	0.125	0.227	0.648	0.429222222222	.
Om22982	230	M	B	0.078	0.252	0.423	0.325	0.381444444444	.
Om22982	231	F	B	0.131	0.478	0.309	0.214	0.347555555556	.
Om22982	232	V	B	0.074	0.725	0.163	0.112	0.314222222222	.
Om22982	233	P	B	0.109	0.751	0.050	0.199	0.298444444444	.
Om22982	234	I	B	0.136	0.831	0.044	0.125	0.282666666667	.
Om22982	235	F	B	0.182	0.831	0.044	0.125	0.276111111111	.
Om22982	236	A	B	0.101	0.802	0.014	0.185	0.270555555556	.
Om22982	237	P	B	0.141	0.859	0.002	0.139	0.284444444444	.
Om22982	238	H	B	0.244	0.970	0.001	0.029	0.295222222222	.
Om22982	239	V	B	0.264	0.970	0.001	0.029	0.303777777778	.
Om22982	240	G	B	0.122	0.970	0.001	0.029	0.308555555556	.
Om22982	241	G	B	0.102	0.988	0.000	0.012	0.325888888889	.
Om22982	242	V	B	0.255	0.988	0.000	0.012	0.342666666667	.
Om22982	243	L	B	0.217	0.988	0.000	0.012	0.350555555556	.
Om22982	244	G	B	0.127	0.988	0.000	0.012	0.357888888889	.
Om22982	245	A	B	0.132	0.988	0.000	0.012	0.371	.
Om22982	246	W	E	0.261	0.970	0.001	0.029	0.385888888889	.
Om22982	247	T	B	0.115	0.988	0.000	0.012	0.371111111111	.
Om22982	248	Y	B	0.091	0.988	0.000	0.012	0.380333333333	.
Om22982	249	K	E	0.298	0.988	0.000	0.012	0.407333333333	.
Om22982	250	V	B	0.169	0.970	0.001	0.029	0.439222222222	.
Om22982	251	C	B	0.043	0.938	0.007	0.055	0.453444444444	.
Om22982	252	V	B	0.113	0.878	0.010	0.111	0.472555555556	.
Om22982	253	E	E	0.296	0.522	0.016	0.462	0.502333333333	E
Om22982	254	D	E	0.419	0.181	0.017	0.803	0.519888888889	E
Om22982	255	N	E	0.538	0.053	0.004	0.942	0.537111111111	E
Om22982	256	W	B	0.269	0.018	0.019	0.964	0.576	E
Om22982	257	P	E	0.546	0.058	0.017	0.925	0.594888888889	E
Om22982	258	E	E	0.693	0.116	0.016	0.868	0.604222222222	E
Om22982	259	E	E	0.631	0.116	0.016	0.868	0.605555555556	E
Om22982	260	E	E	0.614	0.181	0.017	0.803	0.608	E
Om22982	261	P	E	0.415	0.257	0.016	0.727	0.602888888889	E
Om22982	262	T	E	0.539	0.184	0.043	0.773	0.592444444444	E
Om22982	263	V	E	0.55	0.278	0.093	0.628	0.595333333333	E
Om22982	264	I	E	0.494	0.191	0.086	0.723	0.593888888889	E
Om22982	265	L	B	0.247	0.191	0.086	0.723	0.601111111111	E
Om22982	266	P	E	0.553	0.191	0.086	0.723	0.615777777778	E
Om22982	267	V	E	0.427	0.113	0.087	0.800	0.618888888889	E
Om22982	268	S	E	0.496	0.113	0.087	0.800	0.621555555556	E
Om22982	269	T	E	0.453	0.113	0.087	0.800	0.626777777778	E
Om22982	270	S	E	0.488	0.191	0.086	0.723	0.642	E
Om22982	271	K	E	0.608	0.353	0.048	0.598	0.649888888889	E
Om22982	272	N	E	0.549	0.455	0.046	0.498	0.660333333333	E
Om22982	273	S	E	0.51	0.561	0.047	0.393	0.667555555556	E
Om22982	274	E	E	0.433	0.561	0.047	0.393	0.667555555556	E
Om22982	275	L	E	0.474	0.455	0.046	0.498	0.648444444444	E
Om22982	276	G	E	0.404	0.353	0.048	0.598	0.642222222222	E
Om22982	277	T	E	0.568	0.268	0.043	0.689	0.635666666667	E
Om22982	278	T	E	0.508	0.278	0.093	0.628	0.627	E
Om22982	279	A	E	0.488	0.191	0.086	0.723	0.606111111111	E
Om22982	280	S	E	0.388	0.113	0.043	0.844	0.598	E
Om22982	281	A	E	0.681	0.116	0.016	0.868	0.574777777778	E
Om22982	282	E	E	0.604	0.058	0.017	0.925	0.557555555556	E
Om22982	283	M	E	0.405	0.053	0.043	0.903	0.538444444444	E
Om22982	284	N	E	0.434	0.056	0.142	0.802	0.533777777778	E
Om22982	285	I	B	0.101	0.021	0.452	0.528	0.518888888889	E
Om22982	286	L	E	0.315	0.024	0.655	0.322	0.515666666667	E
Om22982	287	F	B	0.131	0.021	0.756	0.223	0.516111111111	E
Om22982	288	S	E	0.415	0.021	0.452	0.528	0.515333333333	E
Om22982	289	C	B	0.198	0.018	0.141	0.840	0.505	E
Om22982	290	D	E	0.618	0.018	0.141	0.840	0.448777777778
Om22982	291	S	E	0.415	0.020	0.205	0.775	0.391111111111
Om22982	292	C	E	0.314	0.018	0.141	0.840	0.338333333333
Om22982	293	V	E	0.692	0.003	0.003	0.994	0.284555555556

## Sheet: Chou_Fasman (turns)
Position	Residue	Start	End	Peptide	Score
4	Q	1	7	MKIQSTF	0.864
5	S	2	8	KIQSTFV	0.85
6	T	3	9	IQSTFVR	0.841
7	F	4	10	QSTFVRE	0.88
8	V	5	11	STFVREL	0.824
9	R	6	12	TFVRELI	0.687
10	E	7	13	FVRELIN	0.773
11	L	8	14	VRELINE	0.793
12	I	9	15	RELINEF	0.807
13	N	10	16	ELINEFL	0.756
14	E	11	17	LINEFLG	0.873
15	F	12	18	INEFLGT	0.926
16	L	13	19	NEFLGTF	0.944
17	G	14	20	EFLGTFT	0.859
18	T	15	21	FLGTFTL	0.837
19	F	16	22	LGTFTLI	0.819
20	T	17	23	GTFTLIV	0.806
21	L	18	24	TFTLIVF	0.669
22	I	19	25	FTLIVFG	0.754
23	V	20	26	TLIVFGD	0.877
24	F	21	27	LIVFGDS	0.944
25	G	22	28	IVFGDSV	0.931
26	D	23	29	VFGDSVM	0.95
27	S	24	30	FGDSVMA	0.973
28	V	25	31	GDSVMAI	0.954
29	M	26	32	DSVMAII	0.799
30	A	27	33	SVMAIII	0.657
31	I	28	34	VMAIIIA	0.547
32	I	29	35	MAIIIAG	0.699
33	I	30	36	AIIIAGR	0.749
34	A	31	37	IIIAGRQ	0.794
35	G	32	38	IIAGRQE	0.833
36	R	33	39	IAGRQEH	0.901
37	Q	34	40	AGRQEHN	1057
38	E	35	41	GRQEHNA	1057
39	H	36	42	RQEHNAG	1057
40	N	37	43	QEHNAGI	0.989
41	A	38	44	EHNAGII	0.916
42	G	39	45	HNAGIIG	1033
43	I	40	46	NAGIIGP	1114
44	I	41	47	AGIIGPV	0.963
45	G	42	48	GIIGPVG	1091
46	P	43	49	IIGPVGW	1006
47	V	44	50	IGPVGWG	1161
48	G	45	51	GPVGWGT	1231
49	W	46	52	PVGWGTA	1103
50	G	47	53	VGWGTAI	0.953
51	T	48	54	GWGTAIF	0.967
52	A	49	55	WGTAIFC	0.914
53	I	50	56	GTAIFCA	0.871
54	F	51	57	TAIFCAV	0.72
55	C	52	58	AIFCAVT	0.72
56	A	53	59	IFCAVTV	0.697
57	V	54	60	FCAVTVS	0.834
58	T	55	61	CAVTVSG	0.971
59	V	56	62	AVTVSGG	1024
60	S	57	63	VTVSGGV	1001
61	G	58	64	TVSGGVS	1134
62	G	59	65	VSGGVSA	1091
63	V	60	66	SGGVSAH	1156
64	S	61	67	GGVSAHL	1036
65	A	62	68	GVSAHLN	1036
66	H	63	69	VSAHLNP	1.03
67	L	64	70	SAHLNPA	1053
68	N	65	71	AHLNPAV	0.92
69	P	66	72	HLNPAVT	0.963
70	A	67	73	LNPAVTL	0.911
71	V	68	74	NPAVTLA	0.921
72	T	69	75	PAVTLAL	0.783
73	L	70	76	AVTLALA	0.66
74	A	71	77	VTLALAS	0.77
75	L	72	78	TLALASV	0.77
76	A	73	79	LALASVK	0.777
77	S	74	80	ALASVKK	0.837
78	V	75	81	LASVKKF	0.829
79	K	76	82	ASVKKFP	0.961
80	K	77	83	SVKKFPI	0.934
81	F	78	84	VKKFPIK	0.874
82	P	79	85	KKFPIKK	0.947
83	I	80	86	KFPIKKV	0.874
84	K	81	87	FPIKKVP	0.947
85	K	82	88	PIKKVPL	0.946
86	V	83	89	IKKVPLF	0.814
87	P	84	90	KKVPLFF	0.833
88	L	85	91	KVPLFFV	0.76
89	F	86	92	VPLFFVA	0.71
90	F	87	93	PLFFVAQ	0.779
91	V	88	94	LFFVAQY	0.724
92	A	89	95	FFVAQYT	0.777
93	Q	90	96	FVAQYTG	0.914
94	Y	91	97	VAQYTGA	0.923
95	T	92	98	AQYTGAF	0.937
96	G	93	99	QYTGAFF	0.929
97	A	94	100	YTGAFFA	0.883
98	F	95	101	TGAFFAA	0.814
99	F	96	102	GAFFAAA	0.771
100	A	97	103	AFFAAAV	0.62
101	A	98	104	FFAAAVV	0.597
102	A	99	105	FAAAVVF	0.597
103	V	100	106	AAAVVFA	0.606
104	V	101	107	AAVVFAI	0.579
105	F	102	108	AVVFAIY	0.647
106	A	103	109	VVFAIYR	0.689
107	I	104	110	VFAIYRD	0.826
108	Y	105	111	FAIYRDA	0.849
109	R	106	112	AIYRDAI	0.83
110	D	107	113	IYRDAID	0.944
111	A	108	114	YRDAIDA	0.971
112	I	109	115	RDAIDAV	0.88
113	D	110	116	DAIDAVD	0.953
114	A	111	117	AIDAVDS	0.949
115	V	112	118	IDAVDSG	1077
116	D	113	119	DAVDSGV	1081
117	S	114	120	AVDSGVR	1009
118	G	115	121	VDSGVRS	1119
119	V	116	122	DSGVRSV	1119
120	R	117	123	SGVRSVL	0.994
121	S	118	124	GVRSVLG	1013
122	V	119	125	VRSVLGP	1007
123	L	120	126	RSVLGPT	1073
124	G	121	127	SVLGPTG	1.16
125	P	122	128	VLGPTGT	1093
126	T	123	129	LGPTGTA	1116
127	G	124	130	GPTGTAP	1249
128	T	125	131	PTGTAPI	1093
129	A	126	132	TGTAPIF	0.961
130	P	127	133	GTAPIFA	0.919
131	I	128	134	TAPIFAT	0.833
132	F	129	135	APIFATY	0.859
133	A	130	136	PIFATYP	0.981
134	T	131	137	IFATYPR	0.9
135	Y	132	138	FATYPRE	0.939
136	P	133	139	ATYPREG	1076
137	R	134	140	TYPREGI	1049
138	E	135	141	YPREGIS	1116
139	G	136	142	PREGIST	1.09
140	I	137	143	REGISTL	0.957
141	S	138	144	EGISTLT	0.959
142	T	139	145	GISTLTC	1023
143	L	140	146	ISTLTCF	0.886
144	T	141	147	STLTCFI	0.886
145	C	142	148	TLTCFID	0.89
146	F	143	149	LTCFIDQ	0.893
147	I	144	150	TCFIDQV	0.88
148	D	145	151	CFIDQVV	0.814
149	Q	146	152	FIDQVVT	0.781
150	V	147	153	IDQVVTT	0.833
151	V	148	154	DQVVTTG	0.989
152	T	149	155	QVVTTGC	0.95
153	T	150	156	VVTTGCL	0.894
154	G	151	157	VTTGCLV	0.894
155	C	152	158	TTGCLVL	0.907
156	L	153	159	TGCLVLT	0.907
157	V	154	160	GCLVLTA	0.864
158	L	155	161	CLVLTAE	0.747
159	T	156	162	LVLTAEA	0.671
160	A	157	163	VLTAEAI	0.654
161	E	158	164	LTAEAIT	0.72
162	A	159	165	TAEAITD	0.844
163	I	160	166	AEAITDP	0.924
164	T	161	167	EAITDPR	0.966
165	D	162	168	AITDPRN	1083
166	P	163	169	ITDPRNF	1074
167	R	164	170	TDPRNFG	1.23
168	N	165	171	DPRNFGG	1316
169	F	166	172	PRNFGGL	1191
170	G	167	173	RNFGGLP	1191
171	G	168	174	NFGGLPK	1.2
172	L	169	175	FGGLPKP	1194
173	P	170	176	GGLPKPF	1194
174	K	171	177	GLPKPFY	1134
175	P	172	178	LPKPFYP	1129
176	F	173	179	PKPFYPL	1129
177	Y	174	180	KPFYPLA	1006
178	P	175	181	PFYPLAL	0.946
179	L	176	182	FYPLALG	0.951
180	A	177	183	YPLALGL	0.95
181	L	178	184	PLALGLM	0.873
182	G	179	185	LALGLMI	0.723
183	L	180	186	ALGLMIS	0.843
184	M	181	187	LGLMISA	0.843
185	I	182	188	GLMISAE	0.864
186	S	183	189	LMISAEI	0.709
187	A	184	190	MISAEIF	0.71
188	E	185	191	ISAEIFA	0.719
189	I	186	192	SAEIFAF	0.737
190	F	187	193	AEIFAFS	0.737
191	A	188	194	EIFAFSY	0.806
192	F	189	195	IFAFSYN	0.923
193	S	190	196	FAFSYNC	1026
194	Y	191	197	AFSYNCM	1026
195	N	192	198	FSYNCMA	1026
196	C	193	199	SYNCMAP	1157
197	M	194	200	YNCMAPL	1037
198	A	195	201	NCMAPLN	1097
199	P	196	202	CMAPLNP	1091
200	L	197	203	MAPLNPA	1016
201	N	198	204	APLNPAR	1066
202	P	199	205	PLNPARD	1.18
203	A	200	206	LNPARDL	1047
204	R	201	207	NPARDLG	1186
205	D	202	208	PARDLGP	1.18
206	L	203	209	ARDLGPR	1099
207	G	204	210	RDLGPRV	1076
208	P	205	211	DLGPRVF	1026
209	R	206	212	LGPRVFT	0.954
210	V	207	213	GPRVFTA	0.964
211	F	208	214	PRVFTAI	0.809
212	T	209	215	RVFTAIA	0.686
213	A	210	216	VFTAIAG	0.773
214	I	211	217	FTAIAGW	0.839
215	A	212	218	TAIAGWG	0.976
216	G	213	219	AIAGWGM	0.924
217	W	214	220	IAGWGME	0.936
218	G	215	221	AGWGMEV	0.94
219	M	216	222	GWGMEVF	0.931
220	E	217	223	WGMEVFS	0.913
221	V	218	224	GMEVFSV	0.847
222	F	219	225	MEVFSVR	0.76
223	S	220	226	EVFSVRD	0.883
224	V	221	227	VFSVRDY	0.94
225	R	222	228	FSVRDYV	0.94
226	D	223	229	SVRDYVW	0.991
227	Y	224	230	VRDYVWM	0.873
228	V	225	231	RDYVWMF	0.887
229	W	226	232	DYVWMFV	0.823
230	M	227	233	YVWMFVP	0.831
231	F	228	234	VWMFVPI	0.736
232	V	229	235	WMFVPIF	0.75
233	P	230	236	MFVPIFA	0.707
234	I	231	237	FVPIFAP	0.839
235	F	232	238	VPIFAPH	0.889
236	A	233	239	PIFAPHV	0.889
237	P	234	240	IFAPHVG	0.894
238	H	235	241	FAPHVGG	1.05
239	V	236	242	APHVGGV	1036
240	G	237	243	PHVGGVL	1026
241	G	238	244	HVGGVLG	1031
242	V	239	245	VGGVLGA	0.99
243	L	240	246	GGVLGAW	1056
244	G	241	247	GVLGAWT	0.97
245	A	242	248	VLGAWTY	0.91
246	W	243	249	LGAWTYK	0.983
247	T	244	250	GAWTYKV	0.97
248	Y	245	251	AWTYKVC	0.917
249	K	246	252	WTYKVCV	0.894
250	V	247	253	TYKVCVE	0.863
251	C	248	254	YKVCVED	0.934
252	V	249	255	KVCVEDN	0.994
253	E	250	256	VCVEDNW	0.987
254	D	251	257	CVEDNWP	1133
255	N	252	258	VEDNWPE	1069
256	W	253	259	EDNWPEE	1103
257	P	254	260	DNWPEEE	1103
258	E	255	261	NWPEEEP	1111
259	E	256	262	WPEEEPT	1026
260	E	257	263	PEEEPTV	0.96
261	P	258	264	EEEPTVI	0.81
262	T	259	265	EEPTVIL	0.789
263	V	260	266	EPTVILP	0.9
264	I	261	267	PTVILPV	0.866
265	L	262	268	TVILPVS	0.853
266	P	263	269	VILPVST	0.853
267	V	264	270	ILPVSTS	0.986
268	S	265	271	LPVSTSK	1063
269	T	266	272	PVSTSKN	1201
270	S	267	273	VSTSKNS	1189
271	K	268	274	STSKNSE	1223
272	N	269	275	TSKNSEL	1103
273	S	270	276	SKNSELG	1189
274	E	271	277	KNSELGT	1121
275	L	272	278	NSELGTT	1114
276	G	273	279	SELGTTA	0.986
277	T	274	280	ELGTTAS	0.986
278	T	275	281	LGTTASA	0.974
279	A	276	282	GTTASAE	0.996
280	S	277	283	TTASAEM	0.859
281	A	278	284	TASAEMN	0.944
282	E	279	285	ASAEMNI	0.874
283	M	280	286	SAEMNIL	0.864
284	N	281	287	AEMNILF	0.746
285	I	282	288	EMNILFS	0.856
286	L	283	289	MNILFSC	0.92
287	F	284	290	NILFSCD	1043
288	S	285	291	ILFSCDS	1024
289	C	286	292	LFSCDSC	1127
290	D	287	293	FSCDSCV	1114

## Sheet: Karplus (flex.)
Position	Residue	Start	End	Peptide	Score
4	Q	1	7	MKIQSTF	1044
5	S	2	8	KIQSTFV	1045
6	T	3	9	IQSTFVR	1024
7	F	4	10	QSTFVRE	1003
8	V	5	11	STFVREL	0.989
9	R	6	12	TFVRELI	0.981
10	E	7	13	FVRELIN	0.979
11	L	8	14	VRELINE	0.979
12	I	9	15	RELINEF	0.972
13	N	10	16	ELINEFL	0.972
14	E	11	17	LINEFLG	0.975
15	F	12	18	INEFLGT	0.98
16	L	13	19	NEFLGTF	0.988
17	G	14	20	EFLGTFT	0.991
18	T	15	21	FLGTFTL	0.986
19	F	16	22	LGTFTLI	0.97
20	T	17	23	GTFTLIV	0.951
21	L	18	24	TFTLIVF	0.932
22	I	19	25	FTLIVFG	0.923
23	V	20	26	TLIVFGD	0.936
24	F	21	27	LIVFGDS	0.958
25	G	22	28	IVFGDSV	0.983
26	D	23	29	VFGDSVM	0.987
27	S	24	30	FGDSVMA	0.973
28	V	25	31	GDSVMAI	0.939
29	M	26	32	DSVMAII	0.901
30	A	27	33	SVMAIII	0.882
31	I	28	34	VMAIIIA	0.875
32	I	29	35	MAIIIAG	0.89
33	I	30	36	AIIIAGR	0.919
34	A	31	37	IIIAGRQ	0.961
35	G	32	38	IIAGRQE	1006
36	R	33	39	IAGRQEH	1037
37	Q	34	40	AGRQEHN	1.05
38	E	35	41	GRQEHNA	1038
39	H	36	42	RQEHNAG	1012
40	N	37	43	QEHNAGI	0.985
41	A	38	44	EHNAGII	0.962
42	G	39	45	HNAGIIG	0.947
43	I	40	46	NAGIIGP	0.95
44	I	41	47	AGIIGPV	0.963
45	G	42	48	GIIGPVG	0.981
46	P	43	49	IIGPVGW	0.991
47	V	44	50	IGPVGWG	0.989
48	G	45	51	GPVGWGT	0.985
49	W	46	52	PVGWGTA	0.981
50	G	47	53	VGWGTAI	0.98
51	T	48	54	GWGTAIF	0.975
52	A	49	55	WGTAIFC	0.957
53	I	50	56	GTAIFCA	0.935
54	F	51	57	TAIFCAV	0.919
55	C	52	58	AIFCAVT	0.912
56	A	53	59	IFCAVTV	0.917
57	V	54	60	FCAVTVS	0.935
58	T	55	61	CAVTVSG	0.963
59	V	56	62	AVTVSGG	0.997
60	S	57	63	VTVSGGV	1027
61	G	58	64	TVSGGVS	1039
62	G	59	65	VSGGVSA	1026
63	V	60	66	SGGVSAH	0.996
64	S	61	67	GGVSAHL	0.966
65	A	62	68	GVSAHLN	0.948
66	H	63	69	VSAHLNP	0.951
67	L	64	70	SAHLNPA	0.967
68	N	65	71	AHLNPAV	0.982
69	P	66	72	HLNPAVT	0.987
70	A	67	73	LNPAVTL	0.976
71	V	68	74	NPAVTLA	0.959
72	T	69	75	PAVTLAL	0.943
73	L	70	76	AVTLALA	0.932
74	A	71	77	VTLALAS	0.926
75	L	72	78	TLALASV	0.93
76	A	73	79	LALASVK	0.944
77	S	74	80	ALASVKK	0.966
78	V	75	81	LASVKKF	0.991
79	K	76	82	ASVKKFP	1006
80	K	77	83	SVKKFPI	1007
81	F	78	84	VKKFPIK	1.0
82	P	79	85	KKFPIKK	1001
83	I	80	86	KFPIKKV	1009
84	K	81	87	FPIKKVP	1017
85	K	82	88	PIKKVPL	1018
86	V	83	89	IKKVPLF	0.998
87	P	84	90	KKVPLFF	0.972
88	L	85	91	KVPLFFV	0.948
89	F	86	92	VPLFFVA	0.931
90	F	87	93	PLFFVAQ	0.923
91	V	88	94	LFFVAQY	0.922
92	A	89	95	FFVAQYT	0.931
93	Q	90	96	FVAQYTG	0.947
94	Y	91	97	VAQYTGA	0.968
95	T	92	98	AQYTGAF	0.983
96	G	93	99	QYTGAFF	0.982
97	A	94	100	YTGAFFA	0.965
98	F	95	101	TGAFFAA	0.94
99	F	96	102	GAFFAAA	0.918
100	A	97	103	AFFAAAV	0.904
101	A	98	104	FFAAAVV	0.9
102	A	99	105	FAAAVVF	0.901
103	V	100	106	AAAVVFA	0.904
104	V	101	107	AAVVFAI	0.904
105	F	102	108	AVVFAIY	0.904
106	A	103	109	VVFAIYR	0.91
107	I	104	110	VFAIYRD	0.928
108	Y	105	111	FAIYRDA	0.953
109	R	106	112	AIYRDAI	0.974
110	D	107	113	IYRDAID	0.983
111	A	108	114	YRDAIDA	0.97
112	I	109	115	RDAIDAV	0.952
113	D	110	116	DAIDAVD	0.948
114	A	111	117	AIDAVDS	0.965
115	V	112	118	IDAVDSG	0.997
116	D	113	119	DAVDSGV	1033
117	S	114	120	AVDSGVR	1054
118	G	115	121	VDSGVRS	1052
119	V	116	122	DSGVRSV	1037
120	R	117	123	SGVRSVL	1017
121	S	118	124	GVRSVLG	1002
122	V	119	125	VRSVLGP	0.994
123	L	120	126	RSVLGPT	1004
124	G	121	127	SVLGPTG	1025
125	P	122	128	VLGPTGT	1047
126	T	123	129	LGPTGTA	1067
127	G	124	130	GPTGTAP	1069
128	T	125	131	PTGTAPI	1044
129	A	126	132	TGTAPIF	1.01
130	P	127	133	GTAPIFA	0.972
131	I	128	134	TAPIFAT	0.942
132	F	129	135	APIFATY	0.931
133	A	130	136	PIFATYP	0.941
134	T	131	137	IFATYPR	0.962
135	Y	132	138	FATYPRE	0.992
136	P	133	139	ATYPREG	1024
137	R	134	140	TYPREGI	1039
138	E	135	141	YPREGIS	1.05
139	G	136	142	PREGIST	1048
140	I	137	143	REGISTL	1036
141	S	138	144	EGISTLT	1025
142	T	139	145	GISTLTC	1003
143	L	140	146	ISTLTCF	0.974
144	T	141	147	STLTCFI	0.946
145	C	142	148	TLTCFID	0.932
146	F	143	149	LTCFIDQ	0.938
147	I	144	150	TCFIDQV	0.953
148	D	145	151	CFIDQVV	0.975
149	Q	146	152	FIDQVVT	0.985
150	V	147	153	IDQVVTT	0.989
151	V	148	154	DQVVTTG	0.998
152	T	149	155	QVVTTGC	1003
153	T	150	156	VVTTGCL	1002
154	G	151	157	VTTGCLV	0.988
155	C	152	158	TTGCLVL	0.962
156	L	153	159	TGCLVLT	0.942
157	V	154	160	GCLVLTA	0.938
158	L	155	161	CLVLTAE	0.945
159	T	156	162	LVLTAEA	0.956
160	A	157	163	VLTAEAI	0.962
161	E	158	164	LTAEAIT	0.96
162	A	159	165	TAEAITD	0.963
163	I	160	166	AEAITDP	0.974
164	T	161	167	EAITDPR	0.997
165	D	162	168	AITDPRN	1016
166	P	163	169	ITDPRNF	1023
167	R	164	170	TDPRNFG	1022
168	N	165	171	DPRNFGG	1012
169	F	166	172	PRNFGGL	1003
170	G	167	173	RNFGGLP	1.01
171	G	168	174	NFGGLPK	1.02
172	L	169	175	FGGLPKP	1033
173	P	170	176	GGLPKPF	1046
174	K	171	177	GLPKPFY	1038
175	P	172	178	LPKPFYP	1018
176	F	173	179	PKPFYPL	0.987
177	Y	174	180	KPFYPLA	0.958
178	P	175	181	PFYPLAL	0.941
179	L	176	182	FYPLALG	0.933
180	A	177	183	YPLALGL	0.933
181	L	178	184	PLALGLM	0.929
182	G	179	185	LALGLMI	0.919
183	L	180	186	ALGLMIS	0.909
184	M	181	187	LGLMISA	0.904
185	I	182	188	GLMISAE	0.913
186	S	183	189	LMISAEI	0.926
187	A	184	190	MISAEIF	0.939
188	E	185	191	ISAEIFA	0.937
189	I	186	192	SAEIFAF	0.926
190	F	187	193	AEIFAFS	0.916
191	A	188	194	EIFAFSY	0.911
192	F	189	195	IFAFSYN	0.917
193	S	190	196	FAFSYNC	0.922
194	Y	191	197	AFSYNCM	0.917
195	N	192	198	FSYNCMA	0.909
196	C	193	199	SYNCMAP	0.899
197	M	194	200	YNCMAPL	0.896
198	A	195	201	NCMAPLN	0.914
199	P	196	202	CMAPLNP	0.941
200	L	197	203	MAPLNPA	0.974
201	N	198	204	APLNPAR	1006
202	P	199	205	PLNPARD	1031
203	A	200	206	LNPARDL	1039
204	R	201	207	NPARDLG	1041
205	D	202	208	PARDLGP	1.04
206	L	203	209	ARDLGPR	1031
207	G	204	210	RDLGPRV	1026
208	P	205	211	DLGPRVF	1014
209	R	206	212	LGPRVFT	0.992
210	V	207	213	GPRVFTA	0.968
211	F	208	214	PRVFTAI	0.944
212	T	209	215	RVFTAIA	0.93
213	A	210	216	VFTAIAG	0.923
214	I	211	217	FTAIAGW	0.92
215	A	212	218	TAIAGWG	0.923
216	G	213	219	AIAGWGM	0.924
217	W	214	220	IAGWGME	0.927
218	G	215	221	AGWGMEV	0.931
219	M	216	222	GWGMEVF	0.931
220	E	217	223	WGMEVFS	0.93
221	V	218	224	GMEVFSV	0.931
222	F	219	225	MEVFSVR	0.938
223	S	220	226	EVFSVRD	0.957
224	V	221	227	VFSVRDY	0.978
225	R	222	228	FSVRDYV	0.991
226	D	223	229	SVRDYVW	0.984
227	Y	224	230	VRDYVWM	0.948
228	V	225	231	RDYVWMF	0.911
229	W	226	232	DYVWMFV	0.879
230	M	227	233	YVWMFVP	0.869
231	F	228	234	VWMFVPI	0.883
232	V	229	235	WMFVPIF	0.897
233	P	230	236	MFVPIFA	0.912
234	I	231	237	FVPIFAP	0.919
235	F	232	238	VPIFAPH	0.924
236	A	233	239	PIFAPHV	0.929
237	P	234	240	IFAPHVG	0.94
238	H	235	241	FAPHVGG	0.957
239	V	236	242	APHVGGV	0.969
240	G	237	243	PHVGGVL	0.983
241	G	238	244	HVGGVLG	0.983
242	V	239	245	VGGVLGA	0.97
243	L	240	246	GGVLGAW	0.958
244	G	241	247	GVLGAWT	0.942
245	A	242	248	VLGAWTY	0.936
246	W	243	249	LGAWTYK	0.943
247	T	244	250	GAWTYKV	0.952
248	Y	245	251	AWTYKVC	0.961
249	K	246	252	WTYKVCV	0.966
250	V	247	253	TYKVCVE	0.963
251	C	248	254	YKVCVED	0.965
252	V	249	255	KVCVEDN	0.973
253	E	250	256	VCVEDNW	0.984
254	D	251	257	CVEDNWP	0.998
255	N	252	258	VEDNWPE	1.01
256	W	253	259	EDNWPEE	1022
257	P	254	260	DNWPEEE	1045
258	E	255	261	NWPEEEP	1063
259	E	256	262	WPEEEPT	1075
260	E	257	263	PEEEPTV	1.07
261	P	258	264	EEEPTVI	1041
262	T	259	265	EEPTVIL	1009
263	V	260	266	EPTVILP	0.971
264	I	261	267	PTVILPV	0.947
265	L	262	268	TVILPVS	0.948
266	P	263	269	VILPVST	0.962
267	V	264	270	ILPVSTS	0.999
268	S	265	271	LPVSTSK	1038
269	T	266	272	PVSTSKN	1071
270	S	267	273	VSTSKNS	1103
271	K	268	274	STSKNSE	1112
272	N	269	275	TSKNSEL	1106
273	S	270	276	SKNSELG	1092
274	E	271	277	KNSELGT	1065
275	L	272	278	NSELGTT	1047
276	G	273	279	SELGTTA	1042
277	T	274	280	ELGTTAS	1034
278	T	275	281	LGTTASA	1.03
279	A	276	282	GTTASAE	1018
280	S	277	283	TTASAEM	0.995
281	A	278	284	TASAEMN	0.981
282	E	279	285	ASAEMNI	0.958
283	M	280	286	SAEMNIL	0.943
284	N	281	287	AEMNILF	0.931
285	I	282	288	EMNILFS	0.918
286	L	283	289	MNILFSC	0.919
287	F	284	290	NILFSCD	0.931
288	S	285	291	ILFSCDS	0.954
289	C	286	292	LFSCDSC	0.975

## Sheet: Parker (hidroph.)
Position	Residue	Start	End	Peptide	Score
4	Q	1	7	MKIQSTF	0.286
5	S	2	8	KIQSTFV	0.357
6	T	3	9	IQSTFVR	0.143
7	F	4	10	QSTFVRE	2.4
8	V	5	11	STFVREL	0.229
9	R	6	12	TFVRELI	-1843
10	E	7	13	FVRELIN	-1586
11	L	8	14	VRELINE	0.843
12	I	9	15	RELINEF	0.057
13	N	10	16	ELINEFL	-1857
14	E	11	17	LINEFLG	-2157
15	F	12	18	INEFLGT	-0.1
16	L	13	19	NEFLGTF	-0.271
17	G	14	20	EFLGTFT	-0.529
18	T	15	21	FLGTFTL	-2957
19	F	16	22	LGTFTLI	-2786
20	T	17	23	GTFTLIV	-2.0
21	L	18	24	TFTLIVF	-4129
22	I	19	25	FTLIVFG	-4057
23	V	20	26	TLIVFGD	-1314
24	F	21	27	LIVFGDS	-1129
25	G	22	28	IVFGDSV	-0.343
26	D	23	29	VFGDSVM	0.2
27	S	24	30	FGDSVMA	1029
28	V	25	31	GDSVMAI	1.2
29	M	26	32	DSVMAII	-0.757
30	A	27	33	SVMAIII	-3329
31	I	28	34	VMAIIIA	-3957
32	I	29	35	MAIIIAG	-2614
33	I	30	36	AIIIAGR	-1414
34	A	31	37	IIIAGRQ	-0.857
35	G	32	38	IIAGRQE	1.4
36	R	33	39	IAGRQEH	2843
37	Q	34	40	AGRQEHN	4986
38	E	35	41	GRQEHNA	4986
39	H	36	42	RQEHNAG	4986
40	N	37	43	QEHNAGI	3243
41	A	38	44	EHNAGII	1243
42	G	39	45	HNAGIIG	0.943
43	I	40	46	NAGIIGP	0.943
44	I	41	47	AGIIGPV	-0.586
45	G	42	48	GIIGPVG	-0.071
46	P	43	49	IIGPVGW	-2314
47	V	44	50	IGPVGWG	-0.357
48	G	45	51	GPVGWGT	1529
49	W	46	52	PVGWGTA	1014
50	G	47	53	VGWGTAI	-0.429
51	T	48	54	GWGTAIF	-1214
52	A	49	55	WGTAIFC	-1829
53	I	50	56	GTAIFCA	-0.1
54	F	51	57	TAIFCAV	-1443
55	C	52	58	AIFCAVT	-1443
56	A	53	59	IFCAVTV	-2271
57	V	54	60	FCAVTVS	-0.2
58	T	55	61	CAVTVSG	1929
59	V	56	62	AVTVSGG	2543
60	S	57	63	VTVSGGV	1714
61	G	58	64	TVSGGVS	3171
62	G	59	65	VSGGVSA	2729
63	V	60	66	SGGVSAH	3557
64	S	61	67	GGVSAHL	1314
65	A	62	68	GVSAHLN	1.5
66	H	63	69	VSAHLNP	0.986
67	L	64	70	SAHLNPA	1814
68	N	65	71	AHLNPAV	0.357
69	P	66	72	HLNPAVT	0.8
70	A	67	73	LNPAVTL	-0.814
71	V	68	74	NPAVTLA	0.8
72	T	69	75	PAVTLAL	-1514
73	L	70	76	AVTLALA	-1514
74	A	71	77	VTLALAS	-0.886
75	L	72	78	TLALASV	-0.886
76	A	73	79	LALASVK	-0.814
77	S	74	80	ALASVKK	1314
78	V	75	81	LASVKKF	-0.3
79	K	76	82	ASVKKFP	1314
80	K	77	83	SVKKFPI	-0.129
81	F	78	84	VKKFPIK	-0.243
82	P	79	85	KKFPIKK	1.1
83	I	80	86	KFPIKKV	-0.243
84	K	81	87	FPIKKVP	-0.757
85	K	82	88	PIKKVPL	-0.757
86	V	83	89	IKKVPLF	-2371
87	P	84	90	KKVPLFF	-2543
88	L	85	91	KVPLFFV	-3886
89	F	86	92	VPLFFVA	-4.4
90	F	87	93	PLFFVAQ	-3014
91	V	88	94	LFFVAQY	-3586
92	A	89	95	FFVAQYT	-1529
93	Q	90	96	FVAQYTG	0.6
94	Y	91	97	VAQYTGA	2214
95	T	92	98	AQYTGAF	1429
96	G	93	99	QYTGAFF	-0.186
97	A	94	100	YTGAFFA	-0.743
98	F	95	101	TGAFFAA	-0.171
99	F	96	102	GAFFAAA	-0.614
100	A	97	103	AFFAAAV	-1957
101	A	98	104	FFAAAVV	-2786
102	A	99	105	FAAAVVF	-2786
103	V	100	106	AAAVVFA	-1171
104	V	101	107	AAVVFAI	-2614
105	F	102	108	AVVFAIY	-3186
106	A	103	109	VVFAIYR	-2886
107	I	104	110	VFAIYRD	-0.929
108	Y	105	111	FAIYRDA	-0.1
109	R	106	112	AIYRDAI	0.071
110	D	107	113	IYRDAID	1.2
111	A	108	114	YRDAIDA	2643
112	I	109	115	RDAIDAV	2386
113	D	110	116	DAIDAVD	3214
114	A	111	117	AIDAVDS	2714
115	V	112	118	IDAVDSG	3229
116	D	113	119	DAVDSGV	3843
117	S	114	120	AVDSGVR	3014
118	G	115	121	VDSGVRS	3643
119	V	116	122	DSGVRSV	3643
120	R	117	123	SGVRSVL	0.9
121	S	118	124	GVRSVLG	0.786
122	V	119	125	VRSVLGP	0.271
123	L	120	126	RSVLGPT	1543
124	G	121	127	SVLGPTG	1757
125	P	122	128	VLGPTGT	1571
126	T	123	129	LGPTGTA	2.4
127	G	124	130	GPTGTAP	4014
128	T	125	131	PTGTAPI	2057
129	A	126	132	TGTAPIF	0.443
130	P	127	133	GTAPIFA	0.0
131	I	128	134	TAPIFAT	-0.071
132	F	129	135	APIFATY	-1086
133	A	130	136	PIFATYP	-1086
134	T	131	137	IFATYPR	-0.786
135	Y	132	138	FATYPRE	1471
136	P	133	139	ATYPREG	3.6
137	R	134	140	TYPREGI	2157
138	E	135	141	YPREGIS	2343
139	G	136	142	PREGIST	3357
140	I	137	143	REGISTL	1743
141	S	138	144	EGISTLT	1886
142	T	139	145	GISTLTC	0.971
143	L	140	146	ISTLTCF	-1157
144	T	141	147	STLTCFI	-1157
145	C	142	148	TLTCFID	-0.657
146	F	143	149	LTCFIDQ	-0.543
147	I	144	150	TCFIDQV	0.243
148	D	145	151	CFIDQVV	-1029
149	Q	146	152	FIDQVVT	-0.486
150	V	147	153	IDQVVTT	1571
151	V	148	154	DQVVTTG	3529
152	T	149	155	QVVTTGC	2.3
153	T	150	156	VVTTGCL	0.129
154	G	151	157	VTTGCLV	0.129
155	C	152	158	TTGCLVL	-0.657
156	L	153	159	TGCLVLT	-0.657
157	V	154	160	GCLVLTA	-1.1
158	L	155	161	CLVLTAE	-0.8
159	T	156	162	LVLTAEA	-0.7
160	A	157	163	VLTAEAI	-0.529
161	E	158	164	LTAEAIT	0.743
162	A	159	165	TAEAITD	3486
163	I	160	166	AEAITDP	3043
164	T	161	167	EAITDPR	3343
165	D	162	168	AITDPRN	3229
166	P	163	169	ITDPRNF	1614
167	R	164	170	TDPRNFG	3571
168	N	165	171	DPRNFGG	3643
169	F	166	172	PRNFGGL	0.9
170	G	167	173	RNFGGLP	0.9
171	G	168	174	NFGGLPK	1114
172	L	169	175	FGGLPKP	0.414
173	P	170	176	GGLPKPF	0.414
174	K	171	177	GLPKPFY	-0.671
175	P	172	178	LPKPFYP	-1186
176	F	173	179	PKPFYPL	-1186
177	Y	174	180	KPFYPLA	-1186
178	P	175	181	PFYPLAL	-3314
179	L	176	182	FYPLALG	-2.8
180	A	177	183	YPLALGL	-2.8
181	L	178	184	PLALGLM	-3129
182	G	179	185	LALGLMI	-4571
183	L	180	186	ALGLMIS	-2329
184	M	181	187	LGLMISA	-2329
185	I	182	188	GLMISAE	0.1
186	S	183	189	LMISAEI	-1857
187	A	184	190	MISAEIF	-1857
188	E	185	191	ISAEIFA	-0.957
189	I	186	192	SAEIFAF	-1129
190	F	187	193	AEIFAFS	-1129
191	A	188	194	EIFAFSY	-1.7
192	F	189	195	IFAFSYN	-1814
193	S	190	196	FAFSYNC	-0.471
194	Y	191	197	AFSYNCM	0.243
195	N	192	198	FSYNCMA	0.243
196	C	193	199	SYNCMAP	1857
197	M	194	200	YNCMAPL	-0.386
198	A	195	201	NCMAPLN	0.886
199	P	196	202	CMAPLNP	0.186
200	L	197	203	MAPLNPA	0.286
201	N	198	204	APLNPAR	1486
202	P	199	205	PLNPARD	2614
203	A	200	206	LNPARDL	1.0
204	R	201	207	NPARDLG	3129
205	D	202	208	PARDLGP	2429
206	L	203	209	ARDLGPR	2729
207	G	204	210	RDLGPRV	1.9
208	P	205	211	DLGPRVF	-0.014
209	R	206	212	LGPRVFT	-0.7
210	V	207	213	GPRVFTA	0.914
211	F	208	214	PRVFTAI	-1043
212	T	209	215	RVFTAIA	-1043
213	A	210	216	VFTAIAG	-0.829
214	I	211	217	FTAIAGW	-1729
215	A	212	218	TAIAGWG	0.4
216	G	213	219	AIAGWGM	-0.943
217	W	214	220	IAGWGME	-0.129
218	G	215	221	AGWGMEV	0.486
219	M	216	222	GWGMEVF	-1129
220	E	217	223	WGMEVFS	-1014
221	V	218	224	GMEVFSV	-0.114
222	F	219	225	MEVFSVR	-0.329
223	S	220	226	EVFSVRD	1.7
224	V	221	227	VFSVRDY	0.314
225	R	222	228	FSVRDYV	0.314
226	D	223	229	SVRDYVW	0.2
227	Y	224	230	VRDYVWM	-1329
228	V	225	231	RDYVWMF	-2114
229	W	226	232	DYVWMFV	-3243
230	M	227	233	YVWMFVP	-4371
231	F	228	234	VWMFVPI	-5243
232	V	229	235	WMFVPIF	-6029
233	P	230	236	MFVPIFA	-4.3
234	I	231	237	FVPIFAP	-3.4
235	F	232	238	VPIFAPH	-1786
236	A	233	239	PIFAPHV	-1786
237	P	234	240	IFAPHVG	-1271
238	H	235	241	FAPHVGG	0.686
239	V	236	242	APHVGGV	1471
240	G	237	243	PHVGGVL	-0.143
241	G	238	244	HVGGVLG	0.371
242	V	239	245	VGGVLGA	0.371
243	L	240	246	GGVLGAW	-0.529
244	G	241	247	GVLGAWT	-0.6
245	A	242	248	VLGAWTY	-1686
246	W	243	249	LGAWTYK	-0.343
247	T	244	250	GAWTYKV	0.443
248	Y	245	251	AWTYKVC	-0.171
249	K	246	252	WTYKVCV	-1.0
250	V	247	253	TYKVCVE	1543
251	C	248	254	YKVCVED	2229
252	V	249	255	KVCVEDN	3.5
253	E	250	256	VCVEDNW	1257
254	D	251	257	CVEDNWP	2086
255	N	252	258	VEDNWPE	3.0
256	W	253	259	EDNWPEE	4643
257	P	254	260	DNWPEEE	4643
258	E	255	261	NWPEEEP	3514
259	E	256	262	WPEEEPT	3257
260	E	257	263	PEEEPTV	4157
261	P	258	264	EEEPTVI	2714
262	T	259	265	EEPTVIL	0.286
263	V	260	266	EPTVILP	-0.529
264	I	261	267	PTVILPV	-2171
265	L	262	268	TVILPVS	-1543
266	P	263	269	VILPVST	-1543
267	V	264	270	ILPVSTS	-0.086
268	S	265	271	LPVSTSK	1871
269	T	266	272	PVSTSKN	4186
270	S	267	273	VSTSKNS	4814
271	K	268	274	STSKNSE	6457
272	N	269	275	TSKNSEL	4214
273	S	270	276	SKNSELG	4286
274	E	271	277	KNSELGT	4.1
275	L	272	278	NSELGTT	4029
276	G	273	279	SELGTTA	3329
277	T	274	280	ELGTTAS	3329
278	T	275	281	LGTTASA	2514
279	A	276	282	GTTASAE	4943
280	S	277	283	TTASAEM	3529
281	A	278	284	TASAEMN	3786
282	E	279	285	ASAEMNI	1.9
283	M	280	286	SAEMNIL	0.286
284	N	281	287	AEMNILF	-1957
285	I	282	288	EMNILFS	-1329
286	L	283	289	MNILFSC	-2243
287	F	284	290	NILFSCD	-0.214
288	S	285	291	ILFSCDS	-0.286
289	C	286	292	LFSCDSC	1057
290	D	287	293	FSCDSCV	1843

## Sheet: Kolaskar (antig.)
Position	Residue	Start	End	Peptide	Score
4	Q	1	7	MKIQSTF	0.991
5	S	2	8	KIQSTFV	1.07
6	T	3	9	IQSTFVR	1062
7	F	4	10	QSTFVRE	1019
8	V	5	11	STFVREL	1053
9	R	6	12	TFVRELI	1073
10	E	7	13	FVRELIN	1054
11	L	8	14	VRELINE	1019
12	I	9	15	RELINEF	0.978
13	N	10	16	ELINEFL	1032
14	E	11	17	LINEFLG	1035
15	F	12	18	INEFLGT	0.986
16	L	13	19	NEFLGTF	0.977
17	G	14	20	EFLGTFT	0.996
18	T	15	21	FLGTFTL	1053
19	F	16	22	LGTFTLI	1062
20	T	17	23	GTFTLIV	1081
21	L	18	24	TFTLIVF	1112
22	I	19	25	FTLIVFG	1107
23	V	20	26	TLIVFGD	1075
24	F	21	27	LIVFGDS	1.09
25	G	22	28	IVFGDSV	1109
26	D	23	29	VFGDSVM	1062
27	S	24	30	FGDSVMA	1017
28	V	25	31	GDSVMAI	1025
29	M	26	32	DSVMAII	1065
30	A	27	33	SVMAIII	1106
31	I	28	34	VMAIIIA	1113
32	I	29	35	MAIIIAG	1041
33	I	30	36	AIIIAGR	1047
34	A	31	37	IIIAGRQ	1.04
35	G	32	38	IIAGRQE	0.997
36	R	33	39	IAGRQEH	0.991
37	Q	34	40	AGRQEHN	0.937
38	E	35	41	GRQEHNA	0.937
39	H	36	42	RQEHNAG	0.937
40	N	37	43	QEHNAGI	0.977
41	A	38	44	EHNAGII	0.996
42	G	39	45	HNAGIIG	1.0
43	I	40	46	NAGIIGP	0.994
44	I	41	47	AGIIGPV	1.08
45	G	42	48	GIIGPVG	1053
46	P	43	49	IIGPVGW	1056
47	V	44	50	IGPVGWG	1016
48	G	45	51	GPVGWGT	0.982
49	W	46	52	PVGWGTA	1009
50	G	47	53	VGWGTAI	1021
51	T	48	54	GWGTAIF	0.98
52	A	49	55	WGTAIFC	1056
53	I	50	56	GTAIFCA	1081
54	F	51	57	TAIFCAV	1154
55	C	52	58	AIFCAVT	1154
56	A	53	59	IFCAVTV	1199
57	V	54	60	FCAVTVS	1179
58	T	55	61	CAVTVSG	1148
59	V	56	62	AVTVSGG	1071
60	S	57	63	VTVSGGV	1117
61	G	58	64	TVSGGVS	1064
62	G	59	65	VSGGVSA	1086
63	V	60	66	SGGVSAH	1046
64	S	61	67	GGVSAHL	1.08
65	A	62	68	GVSAHLN	1066
66	H	63	69	VSAHLNP	1093
67	L	64	70	SAHLNPA	1048
68	N	65	71	AHLNPAV	1101
69	P	66	72	HLNPAVT	1079
70	A	67	73	LNPAVTL	1099
71	V	68	74	NPAVTLA	1073
72	T	69	75	PAVTLAL	1141
73	L	70	76	AVTLALA	1141
74	A	71	77	VTLALAS	1133
75	L	72	78	TLALASV	1133
76	A	73	79	LALASVK	1136
77	S	74	80	ALASVKK	1.09
78	V	75	81	LASVKKF	1094
79	K	76	82	ASVKKFP	1068
80	K	77	83	SVKKFPI	1.08
81	F	78	84	VKKFPIK	1069
82	P	79	85	KKFPIKK	1004
83	I	80	86	KFPIKKV	1069
84	K	81	87	FPIKKVP	1088
85	K	82	88	PIKKVPL	1.11
86	V	83	89	IKKVPLF	1114
87	P	84	90	KKVPLFF	1106
88	L	85	91	KVPLFFV	1.17
89	F	86	92	VPLFFVA	1189
90	F	87	93	PLFFVAQ	1137
91	V	88	94	LFFVAQY	1151
92	A	89	95	FFVAQYT	1102
93	Q	90	96	FVAQYTG	1071
94	Y	91	97	VAQYTGA	1067
95	T	92	98	AQYTGAF	1025
96	G	93	99	QYTGAFF	1029
97	A	94	100	YTGAFFA	1036
98	F	95	101	TGAFFAA	1022
99	F	96	102	GAFFAAA	1045
100	A	97	103	AFFAAAV	1117
101	A	98	104	FFAAAVV	1163
102	A	99	105	FAAAVVF	1163
103	V	100	106	AAAVVFA	1159
104	V	101	107	AAVVFAI	1172
105	F	102	108	AVVFAIY	1185
106	A	103	109	VVFAIYR	1158
107	I	104	110	VFAIYRD	1084
108	Y	105	111	FAIYRDA	1039
109	R	106	112	AIYRDAI	1047
110	D	107	113	IYRDAID	1019
111	A	108	114	YRDAIDA	1007
112	I	109	115	RDAIDAV	1038
113	D	110	116	DAIDAVD	1037
114	A	111	117	AIDAVDS	1058
115	V	112	118	IDAVDSG	1031
116	D	113	119	DAVDSGV	1064
117	S	114	120	AVDSGVR	1065
118	G	115	121	VDSGVRS	1058
119	V	116	122	DSGVRSV	1058
120	R	117	123	SGVRSVL	1112
121	S	118	124	GVRSVLG	1093
122	V	119	125	VRSVLGP	1.12
123	L	120	126	RSVLGPT	1052
124	G	121	127	SVLGPTG	1052
125	P	122	128	VLGPTGT	1038
126	T	123	129	LGPTGTA	0.992
127	G	124	130	GPTGTAP	0.965
128	T	125	131	PTGTAPI	1005
129	A	126	132	TGTAPIF	1009
130	P	127	133	GTAPIFA	1031
131	I	128	134	TAPIFAT	1036
132	F	129	135	APIFATY	1072
133	A	130	136	PIFATYP	1072
134	T	131	137	IFATYPR	1045
135	Y	132	138	FATYPRE	1002
136	P	133	139	ATYPREG	0.971
137	R	134	140	TYPREGI	0.983
138	E	135	141	YPREGIS	0.998
139	G	136	142	PREGIST	0.962
140	I	137	143	REGISTL	0.989
141	S	138	144	EGISTLT	0.994
142	T	139	145	GISTLTC	1074
143	L	140	146	ISTLTCF	1105
144	T	141	147	STLTCFI	1105
145	C	142	148	TLTCFID	1084
146	F	143	149	LTCFIDQ	1099
147	I	144	150	TCFIDQV	1118
148	D	145	151	CFIDQVV	1186
149	Q	146	152	FIDQVVT	1114
150	V	147	153	IDQVVTT	1088
151	V	148	154	DQVVTTG	1048
152	T	149	155	QVVTTGC	1126
153	T	150	156	VVTTGCL	1.16
154	G	151	157	VTTGCLV	1.16
155	C	152	158	TTGCLVL	1141
156	L	153	159	TGCLVLT	1141
157	V	154	160	GCLVLTA	1163
158	L	155	161	CLVLTAE	1.16
159	T	156	162	LVLTAEA	1.11
160	A	157	163	VLTAEAI	1096
161	E	158	164	LTAEAIT	1028
162	A	159	165	TAEAITD	0.974
163	I	160	166	AEAITDP	0.996
164	T	161	167	EAITDPR	0.968
165	D	162	168	AITDPRN	0.958
166	P	163	169	ITDPRNF	0.962
167	R	164	170	TDPRNFG	0.922
168	N	165	171	DPRNFGG	0.917
169	F	166	172	PRNFGGL	0.972
170	G	167	173	RNFGGLP	0.972
171	G	168	174	NFGGLPK	0.98
172	L	169	175	FGGLPKP	1021
173	P	170	176	GGLPKPF	1021
174	K	171	177	GLPKPFY	1062
175	P	172	178	LPKPFYP	1089
176	F	173	179	PKPFYPL	1089
177	Y	174	180	KPFYPLA	1089
178	P	175	181	PFYPLAL	1135
179	L	176	182	FYPLALG	1108
180	A	177	183	YPLALGL	1.13
181	L	178	184	PLALGLM	1083
182	G	179	185	LALGLMI	1095
183	L	180	186	ALGLMIS	1061
184	M	181	187	LGLMISA	1061
185	I	182	188	GLMISAE	1004
186	S	183	189	LMISAEI	1044
187	A	184	190	MISAEIF	1021
188	E	185	191	ISAEIFA	1055
189	I	186	192	SAEIFAF	1046
190	F	187	193	AEIFAFS	1046
191	A	188	194	EIFAFSY	1.06
192	F	189	195	IFAFSYN	1.05
193	S	190	196	FAFSYNC	1087
194	Y	191	197	AFSYNCM	1049
195	N	192	198	FSYNCMA	1049
196	C	193	199	SYNCMAP	1045
197	M	194	200	YNCMAPL	1079
198	A	195	201	NCMAPLN	1024
199	P	196	202	CMAPLNP	1065
200	L	197	203	MAPLNPA	1015
201	N	198	204	APLNPAR	1022
202	P	199	205	PLNPARD	0.994
203	A	200	206	LNPARDL	1.02
204	R	201	207	NPARDLG	0.967
205	D	202	208	PARDLGP	1008
206	L	203	209	ARDLGPR	0.981
207	G	204	210	RDLGPRV	1026
208	P	205	211	DLGPRVF	1057
209	R	206	212	LGPRVFT	1063
210	V	207	213	GPRVFTA	1037
211	F	208	214	PRVFTAI	1077
212	T	209	215	RVFTAIA	1077
213	A	210	216	VFTAIAG	1077
214	I	211	217	FTAIAGW	1007
215	A	212	218	TAIAGWG	0.976
216	G	213	219	AIAGWGM	0.964
217	W	214	220	IAGWGME	0.933
218	G	215	221	AGWGMEV	0.966
219	M	216	222	GWGMEVF	0.97
220	E	217	223	WGMEVFS	0.99
221	V	218	224	GMEVFSV	1.06
222	F	219	225	MEVFSVR	1.06
223	S	220	226	EVFSVRD	1066
224	V	221	227	VFSVRDY	1.11
225	R	222	228	FSVRDYV	1.11
226	D	223	229	SVRDYVW	1082
227	Y	224	230	VRDYVWM	1055
228	V	225	231	RDYVWMF	1013
229	W	226	232	DYVWMFV	1086
230	M	227	233	YVWMFVP	1114
231	F	228	234	VWMFVPI	1113
232	V	229	235	WMFVPIF	1071
233	P	230	236	MFVPIFA	1096
234	I	231	237	FVPIFAP	1.13
235	F	232	238	VPIFAPH	1132
236	A	233	239	PIFAPHV	1132
237	P	234	240	IFAPHVG	1105
238	H	235	241	FAPHVGG	1065
239	V	236	242	APHVGGV	1107
240	G	237	243	PHVGGVL	1133
241	G	238	244	HVGGVLG	1106
242	V	239	245	VGGVLGA	1.1
243	L	240	246	GGVLGAW	1.03
244	G	241	247	GVLGAWT	1035
245	A	242	248	VLGAWTY	1076
246	W	243	249	LGAWTYK	1012
247	T	244	250	GAWTYKV	1031
248	Y	245	251	AWTYKVC	1107
249	K	246	252	WTYKVCV	1153
250	V	247	253	TYKVCVE	1147
251	C	248	254	YKVCVED	1141
252	V	249	255	KVCVEDN	1086
253	E	250	256	VCVEDNW	1081
254	D	251	257	CVEDNWP	1035
255	N	252	258	VEDNWPE	0.955
256	W	253	259	EDNWPEE	0.879
257	P	254	260	DNWPEEE	0.879
258	E	255	261	NWPEEEP	0.907
259	E	256	262	WPEEEPT	0.926
260	E	257	263	PEEEPTV	0.996
261	P	258	264	EEEPTVI	1009
262	T	259	265	EEPTVIL	1066
263	V	260	266	EPTVILP	1096
264	I	261	267	PTVILPV	1172
265	L	262	268	TVILPVS	1165
266	P	263	269	VILPVST	1165
267	V	264	270	ILPVSTS	1112
268	S	265	271	LPVSTSK	1.08
269	T	266	272	PVSTSKN	1012
270	S	267	273	VSTSKNS	1005
271	K	268	274	STSKNSE	0.929
272	N	269	275	TSKNSEL	0.963
273	S	270	276	SKNSELG	0.958
274	E	271	277	KNSELGT	0.943
275	L	272	278	NSELGTT	0.94
276	G	273	279	SELGTTA	0.981
277	T	274	280	ELGTTAS	0.981
278	T	275	281	LGTTASA	1012
279	A	276	282	GTTASAE	0.955
280	S	277	283	TTASAEM	0.948
281	A	278	284	TASAEMN	0.929
282	E	279	285	ASAEMNI	0.964
283	M	280	286	SAEMNIL	0.99
284	N	281	287	AEMNILF	1001
285	I	282	288	EMNILFS	0.994
286	L	283	289	MNILFSC	1074
287	F	284	290	NILFSCD	1.08
288	S	285	291	ILFSCDS	1114
289	C	286	292	LFSCDSC	1151
290	D	287	293	FSCDSCV	1.17

## Sheet: BepiPred 2.0 Epit
Position	Residue	Score	Assignment
0	M	0.249	.
1	K	0.316	.
2	I	0.379	.
3	Q	0.414	.
4	S	0.462	.
5	T	0.465	.
6	F	0.450	.
7	V	0.442	.
8	R	0.426	.
9	E	0.411	.
10	L	0.377	.
11	I	0.357	.
12	N	0.351	.
13	E	0.332	.
14	F	0.315	.
15	L	0.309	.
16	G	0.301	.
17	T	0.291	.
18	F	0.292	.
19	T	0.296	.
20	L	0.283	.
21	I	0.291	.
22	V	0.304	.
23	F	0.304	.
24	G	0.312	.
25	D	0.306	.
26	S	0.318	.
27	V	0.320	.
28	M	0.338	.
29	A	0.369	.
30	I	0.399	.
31	I	0.430	.
32	I	0.479	.
33	A	0.520	E
34	G	0.557	E
35	R	0.583	E
36	Q	0.604	E
37	E	0.604	E
38	H	0.587	E
39	N	0.563	E
40	A	0.524	E
41	G	0.481	.
42	I	0.444	.
43	I	0.426	.
44	G	0.409	.
45	P	0.390	.
46	V	0.381	.
47	G	0.378	.
48	W	0.378	.
49	G	0.377	.
50	T	0.363	.
51	A	0.348	.
52	I	0.331	.
53	F	0.326	.
54	C	0.324	.
55	A	0.324	.
56	V	0.350	.
57	T	0.371	.
58	V	0.394	.
59	S	0.425	.
60	G	0.455	.
61	G	0.475	.
62	V	0.478	.
63	S	0.475	.
64	A	0.465	.
65	H	0.426	.
66	L	0.385	.
67	N	0.348	.
68	P	0.315	.
69	A	0.275	.
70	V	0.259	.
71	T	0.246	.
72	L	0.248	.
73	A	0.264	.
74	L	0.309	.
75	A	0.355	.
76	S	0.395	.
77	V	0.438	.
78	K	0.478	.
79	K	0.507	E
80	F	0.534	E
81	P	0.531	E
82	I	0.530	E
83	K	0.504	E
84	K	0.472	.
85	V	0.434	.
86	P	0.392	.
87	L	0.356	.
88	F	0.330	.
89	F	0.311	.
90	V	0.309	.
91	A	0.293	.
92	Q	0.274	.
93	Y	0.280	.
94	T	0.290	.
95	G	0.284	.
96	A	0.286	.
97	F	0.277	.
98	F	0.267	.
99	A	0.253	.
100	A	0.256	.
101	A	0.266	.
102	V	0.259	.
103	V	0.268	.
104	F	0.310	.
105	A	0.348	.
106	I	0.384	.
107	Y	0.411	.
108	R	0.460	.
109	D	0.482	.
110	A	0.497	.
111	I	0.535	E
112	D	0.567	E
113	A	0.587	E
114	V	0.597	E
115	D	0.621	E
116	S	0.629	E
117	G	0.620	E
118	V	0.638	E
119	R	0.654	E
120	S	0.646	E
121	V	0.643	E
122	L	0.628	E
123	G	0.610	E
124	P	0.579	E
125	T	0.579	E
126	G	0.568	E
127	T	0.532	E
128	A	0.511	E
129	P	0.496	.
130	I	0.487	.
131	F	0.489	.
132	A	0.502	E
133	T	0.525	E
134	Y	0.532	E
135	P	0.532	E
136	R	0.557	E
137	E	0.562	E
138	G	0.556	E
139	I	0.539	E
140	S	0.517	E
141	T	0.494	.
142	L	0.452	.
143	T	0.431	.
144	C	0.423	.
145	F	0.403	.
146	I	0.394	.
147	D	0.387	.
148	Q	0.373	.
149	V	0.363	.
150	V	0.354	.
151	T	0.357	.
152	T	0.343	.
153	G	0.334	.
154	C	0.320	.
155	L	0.299	.
156	V	0.299	.
157	L	0.307	.
158	T	0.307	.
159	A	0.308	.
160	E	0.316	.
161	A	0.350	.
162	I	0.395	.
163	T	0.443	.
164	D	0.497	.
165	P	0.536	E
166	R	0.572	E
167	N	0.602	E
168	F	0.632	E
169	G	0.649	E
170	G	0.645	E
171	L	0.626	E
172	P	0.608	E
173	K	0.576	E
174	P	0.536	E
175	F	0.497	.
176	Y	0.466	.
177	P	0.443	.
178	L	0.416	.
179	A	0.395	.
180	L	0.371	.
181	G	0.348	.
182	L	0.333	.
183	M	0.339	.
184	I	0.346	.
185	S	0.357	.
186	A	0.349	.
187	E	0.349	.
188	I	0.340	.
189	F	0.349	.
190	A	0.362	.
191	F	0.371	.
192	S	0.376	.
193	Y	0.376	.
194	N	0.370	.
195	C	0.379	.
196	M	0.390	.
197	A	0.395	.
198	P	0.379	.
199	L	0.371	.
200	N	0.373	.
201	P	0.358	.
202	A	0.345	.
203	R	0.340	.
204	D	0.335	.
205	L	0.318	.
206	G	0.307	.
207	P	0.303	.
208	R	0.294	.
209	V	0.292	.
210	F	0.304	.
211	T	0.327	.
212	A	0.354	.
213	I	0.377	.
214	A	0.407	.
215	G	0.450	.
216	W	0.487	.
217	G	0.521	E
218	M	0.552	E
219	E	0.565	E
220	V	0.589	E
221	F	0.594	E
222	S	0.585	E
223	V	0.577	E
224	R	0.561	E
225	D	0.547	E
226	Y	0.522	E
227	V	0.482	.
228	W	0.456	.
229	M	0.407	.
230	F	0.371	.
231	V	0.338	.
232	P	0.319	.
233	I	0.303	.
234	F	0.288	.
235	A	0.280	.
236	P	0.287	.
237	H	0.297	.
238	V	0.305	.
239	G	0.310	.
240	G	0.327	.
241	V	0.343	.
242	L	0.350	.
243	G	0.356	.
244	A	0.370	.
245	W	0.384	.
246	T	0.366	.
247	Y	0.373	.
248	K	0.404	.
249	V	0.439	.
250	C	0.458	.
251	V	0.477	.
252	E	0.506	E
253	D	0.524	E
254	N	0.536	E
255	W	0.579	E
256	P	0.599	E
257	E	0.600	E
258	E	0.597	E
259	E	0.596	E
260	P	0.590	E
261	T	0.580	E
262	V	0.577	E
263	I	0.581	E
264	L	0.585	E
265	P	0.599	E
266	V	0.606	E
267	S	0.607	E
268	T	0.608	E
269	S	0.625	E
270	K	0.634	E
271	N	0.652	E
272	S	0.664	E
273	E	0.666	E
274	L	0.651	E
275	G	0.644	E
276	T	0.638	E
277	T	0.639	E
278	A	0.613	E
279	S	0.600	E
280	A	0.565	E
281	E	0.542	E
282	M	0.508	E
283	N	0.498	.
284	I	0.470	.
285	L	0.464	.
286	F	0.460	.
287	S	0.467	.
288	C	0.460	.
289	D	0.414	.
290	S	0.359	.
291	C	0.320	.
292	V	0.269	.

[truncated: 10 more sheets: BepiPred 1.0, ABCpred, BcePred,  Ellipro (non-linear B), MHC I Pig, MHC I Pig list, MHC II Human, MHC II Mouse, NetChop, PCPS]
