# Supplementary material for: First Data on Ornithodoros moubata Aquaporins: Structural, Phylogenetic and Immunogenic Characterisation as Vaccine Targets
Source: Pathogens. 2022 Jun 16;11(6):694. doi: 10.3390/pathogens11060694 (PMC9227307; doi:10.3390/pathogens11060694)
Supplement: Supplementary file 1 [file pathogens-11-00694-s001.zip › Table S7.xlsx]

## Sheet: Summary
Table S7: Structural, physicochemical and epitope predictions for OmAQP23
Position	Sequence	TMHMM	Emini (accesibility)	BepiPred 2.0 (surface)	Chou & Fasman (turns)	Karplus & Scoultz (flexibility)	Parker (hydrophilicity)	Kolaskar & Tongaonkar	BepiPred 2.0 (epit)	BepiPred 1.0 (epit)	ABCpred	BcePred	Ellipro	MHC I IEDB Pig	MHC II IEDB Human	MHC II IEDB Mouse	NetChop	PCPS	CEG
1	M	i		E					.	.	.	.	.	.	.	T	.	.
2	I	i		E					.	.	.	.	.	.	.	T	.	.
3	L	i	.	E					.	.	.	.	.	T	.	T	S	S
4	D	i	.	E	.	E	.	B	.	.	.	.	.	T	.	T	.	.
5	K	i	.	E	.	E	.	B	B	.	.	B	.	T	.	T	.	.
6	V	i	E	E	.	E	E	B	B	.	.	B	.	T	.	T	.	S
7	K	i	E	E	E	E	E	.	B	.	.	B	.	T	T	T	.	.
8	I	i	.	.	.	E	E	B	B	.	.	.	.	T	T	T	.	S
9	K	i	E	E	.	E	.	B	B	.	.	.	.	T	T	T	S	S
10	S	i	.	E	.	E	.	B	B	.	.	.	B	T	T	T	.	.
11	L	i	E	E	.	E	.	B	.	.	.	.	B	T	T	T	S	S
12	A	i	E	.	.	E	E	.	.	.	.	B	B	T	T	T	.	.
13	L	i	E	.	.	E	E	.	.	.	.	.	B	T	T	T	S	S
14	R	i	E	.	.	E	.	.	.	.	.	.	B	T	T	T	.	.
15	E	i	E	E	.	E	E	.	.	.	.	.	B	T	T	T	.	.
16	T	i	E	.	.	E	E	.	.	.	.	B	B	T	T	.	.	.
17	F	i	E	.	.	E	E	.	.	.	.	B	B	T	T	.	S	S
18	A	i	.	.	.	.	.	.	.	.	.	.	.	T	T	.	.	.
19	E	i	.	.	.	.	.	.	.	.	.	.	.	T	T	.	.	.
20	L	M	.	.	.	.	.	.	.	.	.	.	.	T	T	.	S	S
21	L	M	.	.	.	E	.	B	.	.	.	.	.	T	T	.	.	S
22	G	M	.	.	.	E	.	B	.	.	.	B	.	T	T	.	.	.
23	T	M	.	.	.	E	.	B	.	.	.	B	.	T	T	.	.	.
24	F	M	.	.	.	.	.	B	.	.	.	B	.	T	T	.	S	S
25	V	M	.	E	.	.	.	B	.	.	.	B	.	T	T	.	.	S
26	L	M	.	.	.	.	.	B	.	.	.	B	.	T	T	.	S	S
27	V	M	.	.	.	.	.	B	.	.	.	B	.	.	T	.	S	S
28	L	M	.	.	.	.	.	B	.	.	.	B	.	.	T	.	S	S
29	F	M	.	.	.	.	.	.	.	.	.	B	.	.	T	.	.	S
30	G	M	.	.	.	E	.	B	.	.	B	B	.	.	T	.	.	.
31	T	M	.	.	.	E	.	.	.	.	B	B	.	T	T	.	.	.
32	G	M	.	.	.	E	.	B	.	.	B	.	.	T	T	.	.	.
33	V	M	.	.	.	.	E	.	.	.	B	.	.	T	T	.	S	S
34	L	M	.	.	.	.	.	B	.	.	B	.	.	T	T	.	S	S
35	A	M	.	.	.	.	.	B	.	.	B	.	.	T	T	.	S	.
36	A	M	.	.	.	.	.	B	.	.	B	.	B	T	T	.	.	.
37	L	M	.	.	.	.	.	B	.	.	B	.	B	T	T	.	S	S
38	K	M	E	.	.	E	E	.	.	.	B	.	B	T	T	.	.	.
39	F	M	E	E	.	E	E	.	B	.	B	.	B	T	T	.	S	S
40	D	o	E	E	E	E	E	.	B	.	B	.	B	T	T	.	.	.
41	R	o	E	E	E	E	E	.	B	.	B	B	B	T	T	.	.	S
42	A	o	E	E	E	E	E	.	B	.	B	.	B	T	T	.	.	.
43	G	o	.	E	E	E	E	.	B	.	B	.	B	T	T	.	.	.
44	N	o	.	E	E	E	E	.	B	B	B	.	B	T	T	.	.	.
45	I	o	.	.	E	E	E	.	B	B	B	.	B	T	T	.	.	S
46	G	o	.	.	E	.	E	.	B	B	.	.	B	T	.	.	.	.
47	Y	o	.	.	E	.	E	.	.	.	.	.	B	T	.	.	S	S
48	A	o	.	.	.	.	.	.	.	.	.	.	B	T	.	.	S	.
49	A	M	.	.	E	.	.	.	.	.	.	.	.	T	.	.	.	.
50	G	M	.	.	E	.	.	.	.	.	.	.	.	T	.	.	.	.
51	F	M	.	.	E	.	.	.	.	.	.	.	.	T	.	.	.	.
52	W	M	.	.	E	.	.	.	.	.	.	.	B	T	.	.	.	S
53	G	M	.	.	E	.	.	.	.	.	.	.	.	T	.	.	.	.
54	W	M	.	.	E	.	.	.	.	.	.	.	.	T	.	.	S	S
55	G	M	.	.	E	.	.	.	.	.	.	.	.	T	.	.	.	.
56	L	M	.	E	E	.	.	.	.	.	.	.	.	T	.	.	S	S
57	A	M	.	.	.	.	.	.	.	.	.	.	.	T	.	.	.	.
58	L	M	.	.	E	.	.	.	.	.	.	.	.	T	.	.	S	S
59	G	M	.	.	.	.	.	B	.	.	.	.	.	T	.	T	.	.
60	M	M	.	.	.	.	.	B	.	.	B	.	.	T	.	T	.	S
61	G	M	.	.	.	.	.	.	.	.	B	B	.	T	.	T	.	.
62	V	M	.	.	.	.	.	B	.	.	B	.	.	T	.	T	.	S
63	L	M	.	.	.	.	.	B	.	.	B	.	B	T	.	T	S	S
64	V	M	.	.	E	E	E	B	.	.	B	B	.	T	.	T	S	S
65	S	M	.	.	E	E	E	.	.	.	B	B	.	T	.	T	.	.
66	G	M	.	.	E	E	E	B	.	B	B	.	B	T	.	T	.	.
67	G	M	.	E	E	E	E	.	.	B	B	.	.	T	.	T	.	.
68	A	M	.	.	E	E	E	.	.	B	B	B	.	T	.	T	S	.
69	S	M	.	.	E	E	E	.	.	B	B	.	B	T	.	T	.	.
70	G	M	.	.	E	E	E	.	.	B	B	.	.	T	.	T	.	.
71	A	M	.	.	E	E	E	.	.	B	B	.	.	T	.	T	S	.
72	H	i	.	.	E	.	E	.	.	B	B	.	.	T	.	T	.	.
73	L	i	E	.	E	E	E	.	.	B	B	.	.	T	.	T	.	S
74	N	i	.	.	E	E	E	.	.	B	B	.	.	T	.	T	.	.
75	P	i	.	.	E	E	E	.	.	.	B	.	.	T	.	T	.	.
76	S	i	.	.	E	E	.	B	.	.	.	.	.	T	.	T	.	.
77	I	i	.	.	E	E	E	B	.	.	.	.	.	T	.	T	.	.
78	T	i	.	.	.	.	.	B	.	.	.	.	.	T	.	T	.	.
79	V	i	.	.	.	.	.	B	.	.	.	.	.	T	.	T	S	S
80	A	i	.	.	.	.	.	B	.	.	.	.	.	T	.	T	S	.
81	L	i	.	.	.	.	.	B	.	.	.	.	.	T	.	T	S	S
82	A	i	.	.	.	.	.	B	.	.	.	.	B	T	.	T	S	.
83	T	i	.	.	.	.	E	.	.	.	.	.	B	T	.	T	.	.
84	I	i	.	.	.	E	E	B	.	.	B	.	B	T	.	T	S	S
85	G	i	.	E	E	E	E	B	.	.	B	.	B	T	.	T	.	.
86	K	i	.	E	E	E	E	.	.	.	B	.	B	T	.	T	S	S
87	C	i	.	.	E	E	E	.	B	.	B	.	B	T	.	T	.	.
88	Q	i	E	E	E	.	E	.	B	.	B	B	B	T	.	T	.	.
89	W	i	.	.	.	E	E	B	B	.	B	B	B	T	T	T	S	S
90	R	i	E	E	E	E	E	B	B	.	B	.	B	T	T	T	.	.
91	K	i	E	.	E	E	E	.	.	.	B	B	B	T	T	T	.	.
92	V	M	E	.	E	E	.	B	.	.	B	B	B	T	T	T	.	.
93	P	M	E	.	.	.	.	B	.	.	B	B	B	T	T	T	.	.
94	H	M	.	.	.	.	.	B	.	.	B	B	B	T	T	T	.	.
95	Y	M	.	.	.	.	.	B	.	.	B	.	.	T	T	T	S	S
96	L	M	.	.	.	.	.	B	.	.	B	.	.	T	T	T	S	S
97	V	M	.	.	.	.	.	B	.	.	B	.	B	T	T	T	S	S
98	A	M	.	.	.	.	.	B	.	.	B	.	.	T	T	T	.	.
99	Q	M	.	.	.	.	.	B	.	.	B	.	.	T	T	T	.	.
100	Y	M	.	.	.	.	.	B	.	.	.	.	.	T	T	T	S	S
101	L	M	.	.	.	.	.	B	.	.	.	.	.	T	T	T	S	S
102	G	M	.	.	.	.	.	B	.	.	.	.	.	T	T	T	.	.
103	A	M	.	.	.	.	.	B	.	.	.	.	.	T	T	T	.	.
104	F	M	.	.	.	.	.	B	.	.	.	.	.	T	T	T	.	S
105	L	M	.	.	.	.	.	.	.	.	.	.	.	T	T	T	.	S
106	G	M	.	.	.	.	.	B	.	.	.	.	.	T	T	T	.	.
107	A	M	.	.	.	.	.	B	.	.	.	.	.	T	T	T	.	.
108	A	M	.	.	.	.	.	B	.	.	.	.	.	T	T	T	.	.
109	V	M	.	.	.	.	.	B	.	.	.	.	B	T	T	T	.	S
110	L	M	.	.	.	.	.	B	.	.	.	.	.	T	T	T	S	S
111	F	M	.	.	.	.	.	B	.	.	.	.	B	T	T	T	S	S
112	L	M	.	.	.	.	.	B	.	.	.	B	B	T	T	T	.	S
113	T	M	E	.	.	.	.	B	.	.	.	.	B	T	T	.	.	.
114	Y	M	E	.	.	E	.	.	.	.	B	.	B	T	T	.	S	S
115	K	o	E	.	.	E	.	.	.	.	B	.	B	T	.	.	S	S
116	G	o	E	E	E	E	E	.	.	.	B	.	B	T	.	.	.	.
117	A	o	.	.	E	E	E	.	.	B	B	.	B	T	.	.	.	.
118	F	o	E	.	E	E	E	.	B	B	B	.	B	T	.	.	.	S
119	D	o	E	E	E	E	E	.	B	B	B	.	B	T	.	.	.	.
120	N	o	E	E	E	E	E	.	B	B	B	.	B	T	.	.	.	.
121	Y	o	E	.	E	E	E	.	B	B	B	.	B	T	.	.	S	S
122	D	o	E	E	E	E	E	.	B	B	B	.	B	T	.	.	.	.
123	G	o	E	E	E	E	E	.	B	B	B	.	B	T	.	.	.	.
124	G	o	.	E	E	E	E	.	B	B	B	.	B	T	.	.	.	.
125	F	o	.	.	E	E	E	.	B	B	B	.	B	T	.	.	S	S
126	R	o	E	E	E	E	E	.	B	B	B	.	B	.	.	.	.	S
127	A	o	E	.	E	E	E	.	B	B	B	.	B	.	.	.	S	.
128	T	o	E	E	.	E	E	.	B	B	B	.	B	.	.	.	.	.
129	T	o	.	E	E	E	E	.	B	B	B	.	B	.	.	.	.	.
130	G	o	.	E	E	E	E	.	B	B	B	.	B	T	.	.	.	.
131	V	o	.	E	E	E	E	.	B	B	B	.	B	T	.	.	S	S
132	N	o	.	E	E	E	E	.	B	B	B	.	B	T	.	.	.	.
133	G	o	.	.	E	E	E	.	B	B	B	B	.	T	.	.	.	.
134	T	o	.	.	E	E	E	.	B	B	B	.	.	T	.	.	.	.
135	A	o	.	.	E	E	E	.	.	B	B	.	.	T	.	T	S	.
136	D	o	.	.	.	E	E	.	.	B	B	.	.	T	.	T	.	.
137	V	o	.	.	.	.	E	B	.	B	B	.	.	T	.	T	S	.
138	F	o	.	.	.	.	E	B	.	B	B	.	.	T	.	T	S	S
139	A	o	.	.	E	.	E	B	.	.	B	.	.	T	.	T	.	.
140	S	o	E	.	E	.	.	B	.	B	B	.	.	T	.	T	.	.
141	Y	o	E	.	E	E	E	.	.	.	B	B	.	T	.	T	S	.
142	P	o	E	.	E	E	E	.	.	.	B	B	.	T	.	T	.	.
143	R	o	E	.	E	E	E	B	.	B	B	.	B	T	.	T	S	.
144	D	o	E	E	E	E	E	B	.	B	B	.	B	T	.	T	.	.
145	F	o	.	E	E	E	E	.	B	B	B	.	B	T	.	T	.	S
146	V	M	.	.	E	E	E	.	B	B	B	.	B	T	.	T	.	S
147	G	M	.	.	E	E	E	.	.	B	B	.	B	T	.	T	.	.
148	T	M	.	.	E	E	E	B	.	.	B	.	B	T	.	T	.	.
149	G	M	.	.	E	E	E	B	.	.	B	.	B	T	.	T	S	.
150	N	M	.	.	E	E	E	.	.	.	B	.	B	T	.	.	.	.
151	C	M	.	.	E	E	E	.	.	.	B	.	.	T	.	.	.	S
152	F	M	.	.	E	.	E	.	.	.	.	.	B	T	.	.	.	S
153	L	M	.	.	E	E	E	B	.	.	.	B	B	T	.	.	S	S
154	D	M	.	.	.	E	.	.	.	.	.	B	.	T	.	.	.	.
155	Q	M	.	.	.	E	.	B	.	.	.	B	.	T	.	.	.	.
156	V	M	.	.	.	E	E	B	.	.	.	B	.	T	.	.	.	.
157	V	M	.	.	E	E	E	B	.	.	.	.	.	T	.	.	.	S
158	G	M	.	.	.	E	E	B	.	.	.	B	.	T	.	.	.	.
159	T	M	.	.	.	E	.	B	.	.	.	B	.	T	.	.	.	.
160	G	M	.	.	.	E	.	B	.	.	.	B	.	T	.	.	.	.
161	L	M	.	.	.	.	.	.	.	.	.	.	.	T	.	.	.	S
162	F	M	.	.	.	.	.	B	.	.	.	B	.	T	.	.	.	S
163	V	M	.	.	.	.	.	B	.	.	B	B	.	T	.	.	.	.
164	M	M	.	.	.	.	.	B	.	.	B	B	.	.	.	.	S	.
165	C	M	.	.	.	.	.	B	.	.	B	.	.	.	.	.	.	.
166	I	M	.	.	.	.	.	B	.	.	B	.	.	.	.	.	.	.
167	V	M	.	.	.	.	.	B	.	.	B	.	.	T	.	.	.	S
168	A	M	.	.	.	.	.	B	.	.	B	.	B	T	.	.	.	.
169	I	i	.	.	.	.	E	B	.	.	B	.	.	T	.	.	.	.
170	T	i	E	.	.	E	E	.	.	.	B	.	.	T	.	.	.	.
171	D	i	E	.	E	E	E	.	.	.	B	B	B	T	.	.	.	.
172	N	i	E	E	E	E	E	.	.	.	B	B	B	T	.	T	.	.
173	H	i	E	E	E	.	E	.	B	.	B	B	B	T	.	T	.	.
174	N	i	.	E	E	.	E	.	B	B	B	B	B	T	.	T	.	.
175	M	i	.	E	E	.	E	.	B	B	B	.	B	T	.	T	S	S
176	A	i	E	E	E	.	E	.	B	B	B	.	B	T	.	T	S	.
177	V	i	.	E	E	E	E	.	B	B	B	.	B	T	.	T	S	.
178	P	i	.	E	.	E	E	B	B	B	B	.	B	T	.	T	.	.
179	Q	i	.	E	E	E	E	B	B	B	.	.	B	T	.	T	.	.
180	G	i	E	E	E	E	E	B	B	.	.	B	B	T	.	T	.	.
181	L	M	E	.	E	E	E	B	B	.	.	.	B	T	T	T	S	S
182	Q	M	.	.	E	E	.	B	B	.	.	B	B	T	T	T	.	.
183	P	M	.	.	.	E	.	B	.	.	.	B	.	T	T	T	.	.
184	L	M	.	.	.	E	.	B	.	.	.	B	B	T	T	T	S	S
185	L	M	.	.	.	.	.	B	.	.	.	B	B	T	T	T	S	S
186	I	M	.	.	.	.	.	B	.	.	.	B	.	T	T	T	S	S
187	G	M	.	.	.	.	.	B	.	.	.	B	.	T	T	.	.	.
188	L	M	.	E	.	.	.	B	.	.	B	.	B	T	T	.	S	S
189	S	M	.	.	.	.	.	B	.	.	B	.	.	T	T	.	.	.
190	L	M	.	E	.	.	E	.	.	.	B	.	.	T	T	.	S	S
191	A	M	.	.	.	E	E	B	.	.	B	.	.	T	T	.	S	.
192	T	M	.	.	.	E	E	B	.	.	B	.	B	T	T	.	.	.
193	T	M	.	.	.	E	.	B	.	.	B	.	.	T	T	.	.	.
194	A	M	.	.	.	.	.	.	.	.	B	.	.	T	T	.	.	.
195	L	M	.	.	.	.	.	B	.	.	B	.	B	T	T	T	S	S
196	C	M	.	.	.	.	.	B	.	.	B	.	B	T	.	T	.	S
197	F	M	.	.	E	.	.	.	.	.	B	.	.	T	.	T	S	S
198	G	M	.	.	E	.	.	B	.	.	B	B	.	T	.	T	.	.
199	Y	M	.	.	E	.	E	B	.	.	B	.	B	T	.	T	S	S
200	N	M	.	.	E	.	E	.	.	.	B	.	B	.	.	T	.	.
201	C	M	.	.	E	.	E	.	.	.	B	.	.	.	.	T	.	.
202	G	M	.	.	E	.	E	B	.	B	B	.	.	.	.	T	.	.
203	A	M	.	.	E	.	E	.	.	B	B	.	.	T	.	T	.	.
204	P	o	E	.	E	E	E	B	.	B	B	.	.	T	.	T	.	.
205	L	o	E	.	E	E	E	.	.	B	B	.	.	T	.	T	S	S
206	N	o	E	.	E	E	E	.	.	B	B	.	.	T	.	T	.	.
207	P	o	E	.	E	E	E	.	.	B	B	B	.	T	.	T	.	.
208	A	o	E	.	E	E	E	.	.	B	B	.	.	T	.	T	.	.
209	R	o	E	.	E	E	E	.	.	B	B	.	.	T	.	T	.	.
210	D	o	E	.	E	E	E	.	.	B	B	.	.	T	.	.	.	.
211	L	o	.	.	E	E	E	.	.	B	B	B	.	T	.	.	S	S
212	G	o	E	.	E	E	E	.	.	.	B	.	.	T	.	.	.	.
213	P	o	.	.	E	E	.	.	.	.	B	.	.	T	.	.	.	.
214	R	o	.	.	.	E	.	.	.	.	.	.	.	T	.	.	.	.
215	I	o	.	.	.	.	E	.	.	.	.	.	.	T	.	.	.	.
216	F	o	.	.	.	.	.	.	.	.	.	.	.	T	.	.	S	S
217	T	o	.	.	.	.	.	.	.	.	.	.	.	T	.	.	.	.
218	A	o	.	.	.	.	.	.	.	.	B	.	B	T	.	.	S	.
219	M	o	.	.	.	.	.	.	.	.	B	.	B	T	.	.	S	S
220	A	o	.	.	E	.	E	.	.	.	B	.	B	T	.	.	S	.
221	G	o	.	.	E	.	E	.	.	B	B	.	B	T	.	.	.	.
222	W	o	.	.	E	.	E	.	.	.	B	.	.	T	.	.	S	S
223	G	o	.	E	E	E	E	.	B	.	B	.	B	T	.	.	.	.
224	T	o	.	E	E	E	.	.	B	.	B	.	B	T	.	.	.	.
225	E	o	.	E	.	E	E	.	B	.	B	.	B	T	.	.	.	.
226	V	o	.	E	.	.	E	.	B	.	B	.	.	T	.	.	S	.
227	F	o	.	.	.	.	E	.	B	.	B	.	B	T	.	.	S	S
228	S	o	.	E	.	.	E	.	B	.	B	.	B	T	.	.	.	.
229	F	o	E	E	.	.	.	B	B	.	B	.	B	T	.	.	.	S
230	R	o	E	E	E	E	E	.	B	.	B	B	B	T	T	T	.	.
231	D	o	E	E	E	E	E	.	B	.	B	B	B	T	T	T	.	.
232	Y	o	E	.	E	E	.	.	B	.	B	.	B	T	T	T	S	S
233	N	o	E	.	E	.	.	.	B	.	B	.	B	T	T	T	.	.
234	W	M	.	.	E	.	.	.	.	.	B	.	.	T	T	T	S	.
235	F	M	.	.	E	.	.	.	.	.	B	.	.	T	T	T	.	.
236	W	M	.	.	.	.	.	B	.	.	B	.	B	T	T	T	.	S
237	V	M	.	.	.	.	.	B	.	.	B	B	.	T	T	T	.	.
238	P	M	.	.	.	.	.	.	.	.	B	.	.	T	T	T	.	.
239	V	M	.	.	.	.	.	B	.	.	B	.	.	T	T	T	S	.
240	V	M	.	.	.	.	.	B	.	.	B	.	.	T	T	T	S	S
241	A	M	.	.	.	.	.	B	.	.	B	.	.	T	T	T	.	.
242	P	M	.	.	.	.	.	B	.	.	.	.	.	T	T	T	.	.
243	H	M	.	.	.	.	E	B	.	.	.	.	.	T	T	T	.	.
244	I	M	.	.	.	.	.	B	.	.	.	.	.	T	T	T	.	S
245	G	M	.	.	.	.	.	B	.	.	.	.	.	T	.	T	.	.
246	A	M	.	.	.	.	.	B	.	.	.	.	.	T	.	T	.	.
247	I	M	.	.	.	.	.	B	.	.	.	.	B	T	T	T	.	.
248	V	M	.	.	.	.	.	.	.	.	B	.	B	T	T	T	.	S
249	G	M	.	.	.	.	.	B	.	.	B	.	.	T	T	T	.	.
250	A	M	.	.	.	.	.	B	.	.	B	.	B	T	T	T	.	.
251	W	M	.	.	.	.	.	B	.	.	B	.	B	T	T	T	S	S
252	L	M	.	.	.	.	.	.	.	.	B	.	B	T	T	T	.	S
253	Y	M	.	.	.	.	.	B	.	.	B	.	B	T	T	T	S	S
254	R	M	.	E	.	.	.	B	.	.	B	B	B	T	T	T	S	.
255	L	M	.	.	.	.	.	B	.	.	B	B	B	T	T	T	S	S
256	L	M	.	.	.	.	.	B	.	.	B	B	B	T	T	T	.	S
257	V	i	.	.	.	.	.	B	.	.	B	B	B	T	T	T	S	S
258	G	i	.	.	.	.	.	B	.	.	B	B	B	T	T	T	.	.
259	L	i	.	.	.	.	.	B	B	.	B	B	B	T	T	T	S	S
260	H	i	E	E	E	.	.	B	B	.	B	.	B	T	T	T	.	.
261	W	i	E	.	E	E	E	.	B	.	B	.	B	T	T	T	S	S
262	P	i	E	E	E	E	E	.	B	B	B	.	.	T	.	.	.	.
263	Q	i	E	E	E	E	E	.	B	B	B	B	.	T	.	.	.	.
264	D	i	.	E	E	E	E	.	B	B	B	B	.	T	.	.	.	.
265	S	i	E	E	E	E	E	.	B	B	B	B	.	T	.	.	.	.
266	Y	i	E	E	E	E	E	.	B	B	B	B	.	T	.	.	S	S
267	D	i	E	E	E	E	E	.	B	B	B	B	.	T	.	.	.	.
268	M	i	E	E	E	E	E	.	B	B	B	B	.	T	.	.	S	S
269	E	i	E	E	E	E	E	.	B	B	B	B	.	T	.	.	.	.
270	Q	i	E	E	E	E	E	.	B	B	B	B	.	T	.	.	.	.
271	R	i	E	E	.	E	E	.	B	B	B	B	.	T	.	.	.	.
272	N	i	E	E	E	E	E	.	B	B	B	B	.	T	.	.	.	.
273	R	i	E	E	E	E	E	.	B	B	B	B	.	T	.	.	.	S
274	A	i	E	E	E	E	E	.	B	B	B	B	.	T	.	.	.	.
275	K	i	E	E	E	E	E	.	B	B	.	B	.	T	.	.	.	.
276	D	i	E	E	E	E	E	.	B	B	.	B	.	T	.	.	.	.
277	G	i	E	E	E	E	E	.	B	B	.	B	.	T	.	.	.	.
278	G	i	.	E	E	E	E	.	B	B	.	.	.	T	.	.	S	S
279	Y	i	E	E	E		E	.	B	B	.	.	.	T	.	.	.	.
280	S	i		E					.	B	.	.	.	T	.	.	.	.
281	L	i		E					.	B	.	.	.	T	.	.	S	S
282	E	i		E					.	.	.	.	.		.	.	.	.

## Sheet: Figure OmAQP23
	Position	1									10										20										30										40
Structure and exposure	Sequence	M	I	L	D	K	V	K	I	K	S	L	A	L	R	E	T	F	A	E	L	L	G	T	F	V	L	V	L	F	G	T	G	V	L	A	A	L	K	F	D	R	A	G	N	I	G	Y	A
	TMHMM	i	i	i	i	i	i	i	i	i	i	i	i	i	i	i	i	i	i	i	M	M	M	M	M	M	M	M	M	M	M	M	M	M	M	M	M	M	M	M	o	o	o	o	o	o	o	o	o
	Emini (accesibility)			.	.	.	E	E	.	E	.	E	E	E	E	E	E	E	.	.	.	.	.	.	.	.	.	.	.	.	.	.	.	.	.	.	.	.	E	E	E	E	E	.	.	.	.	.	.
	BepiPred 2.0 (surface)	E	E	E	E	E	E	E	.	E	E	E	.	.	.	E	.	.	.	.	.	.	.	.	.	E	.	.	.	.	.	.	.	.	.	.	.	.	.	E	E	E	E	E	E	.	.	.	.
	Chou & Fasman (turns)				.	.	.	E	.	.	.	.	.	.	.	.	.	.	.	.	.	.	.	.	.	.	.	.	.	.	.	.	.	.	.	.	.	.	.	.	E	E	E	E	E	E	E	E	.
	Karplus & Scoultz (flexibility)				E	E	E	E	E	E	E	E	E	E	E	E	E	E	.	.	.	E	E	E	.	.	.	.	.	.	E	E	E	.	.	.	.	.	E	E	E	E	E	E	E	E	.	.	.
	Parker (hydrophilicity)				.	.	E	E	E	.	.	.	E	E	.	E	E	E	.	.	.	.	.	.	.	.	.	.	.	.	.	.	.	E	.	.	.	.	E	E	E	E	E	E	E	E	E	E	.
Linear and discontinuous B cell epitopes	Kolaskar & Tongaonkar				B	B	B	.	B	B	B	B	.	.	.	.	.	.	.	.	.	B	B	B	B	B	B	B	B	.	B	.	B	.	B	B	B	B	.	.	.	.	.	.	.	.	.	.	.
	BepiPred 2.0	.	.	.	.	B	B	B	B	B	B	.	.	.	.	.	.	.	.	.	.	.	.	.	.	.	.	.	.	.	.	.	.	.	.	.	.	.	.	B	B	B	B	B	B	B	B	.	.
	BepiPred 1.0	.	.	.	.	.	.	.	.	.	.	.	.	.	.	.	.	.	.	.	.	.	.	.	.	.	.	.	.	.	.	.	.	.	.	.	.	.	.	.	.	.	.	.	B	B	B	.	.
	ABCpred	.	.	.	.	.	.	.	.	.	.	.	.	.	.	.	.	.	.	.	.	.	.	.	.	.	.	.	.	.	B	B	B	B	B	B	B	B	B	B	B	B	B	B	B	B	.	.	.
	BcePred	.	.	.	.	B	B	B	.	.	.	.	B	.	.	.	B	B	.	.	.	.	B	B	B	B	B	B	B	B	B	B	.	.	.	.	.	.	.	.	.	B	.	.	.	.	.	.	.
	ElliPro (discontinuous)	.	.	.	.	.	.	.	.	.	B	B	B	B	B	B	B	B	.	.	.	.	.	.	.	.	.	.	.	.	.	.	.	.	.	.	B	B	B	B	B	B	B	B	B	B	B	B	B
T cell epitopes	MHC I IEDB Pig	.	.	T	T	T	T	T	T	T	T	T	T	T	T	T	T	T	T	T	T	T	T	T	T	T	T	.	.	.	.	T	T	T	T	T	T	T	T	T	T	T	T	T	T	T	T	T	T
	MHC II IEDB Human	.	.	.	.	.	.	T	T	T	T	T	T	T	T	T	T	T	T	T	T	T	T	T	T	T	T	T	T	T	T	T	T	T	T	T	T	T	T	T	T	T	T	T	T	T	.	.	.
	MHC II IEDB Mouse	T	T	T	T	T	T	T	T	T	T	T	T	T	T	T	.	.	.	.	.	.	.	.	.	.	.	.	.	.	.	.	.	.	.	.	.	.	.	.	.	.	.	.	.	.	.	.	.
Proteasomal processing	NetChop	.	.	S	.	.	.	.	.	S	.	S	.	S	.	.	.	S	.	.	S	.	.	.	S	.	S	S	S	.	.	.	.	S	S	S	.	S	.	S	.	.	.	.	.	.	.	S	S
	PCPS	.	.	S	.	.	S	.	S	S	.	S	.	S	.	.	.	S	.	.	S	S	.	.	S	S	S	S	S	S	.	.	.	S	S	.	.	S	.	S	.	S	.	.	.	S	.	S	.
	Antigenic peptides																																						OmAQP23_A
				Key OmAQP23:
				o (outside), extracellular; M, transmembrane; i, intracellular
				E, exposed on surface, predicted turns, hydrophilic
				F, predicted turns and flexibility
				B, B-cell epitope
				T, T-cell epitope
				S, predicted proteasome cut site
[truncated: 234 more columns]

## Sheet: TMHMM
TMHMM result
# OmAQP23 Length: 282
# OmAQP23 Number of predicted TMHs: 6
# OmAQP23 Exp number of AAs in TMHs: 125.09081
# OmAQP23 Exp number, first 60 AAs: 32.3988
# OmAQP23 Total prob of N-in: 0.64884
# OmAQP23 POSSIBLE N-term signal sequence
OmAQP23	TMHMM2.0	inside	1 19
OmAQP23	TMHMM2.0	TMhelix	20 39
OmAQP23	TMHMM2.0	outside	40 48
OmAQP23	TMHMM2.0	TMhelix	49 71
OmAQP23	TMHMM2.0	inside	72 91
OmAQP23	TMHMM2.0	TMhelix	92 114
OmAQP23	TMHMM2.0	outside	115 145
OmAQP23	TMHMM2.0	TMhelix	146 168
OmAQP23	TMHMM2.0	inside	169 180
OmAQP23	TMHMM2.0	TMhelix	181 203
OmAQP23	TMHMM2.0	outside	204 233
OmAQP23	TMHMM2.0	TMhelix	234 256
OmAQP23	TMHMM2.0	inside	257 282

## Sheet: Emini (accesibility)
Position	Residue	Start	End	Peptide	Score
3	L	1	6	MILDKV	0.491
4	D	2	7	ILDKVK	0.992
5	K	3	8	LDKVKI	0.992
6	V	4	9	DKVKIK	2406
7	K	5	10	KVKIKS	1931
8	I	6	11	VKIKSL	0.796
9	K	7	12	KIKSLA	1084
10	S	8	13	IKSLAL	0.447
11	L	9	14	KSLALR	1249
12	A	10	15	SLALRE	1082
13	L	11	16	LALRET	1165
14	R	12	17	ALRETF	1223
15	E	13	18	LRETFA	1223
16	T	14	19	RETFAE	2568
17	F	15	20	ETFAEL	1081
18	A	16	21	TFAELL	0.515
19	E	17	22	FAELLG	0.353
20	L	18	23	AELLGT	0.588
21	L	19	24	ELLGTF	0.504
22	G	20	25	LLGTFV	0.216
23	T	21	26	LGTFVL	0.216
24	F	22	27	GTFVLV	0.195
25	V	23	28	TFVLVL	0.162
26	L	24	29	FVLVLF	0.097
27	V	25	30	VLVLFG	0.111
28	L	26	31	LVLFGT	0.216
29	F	27	32	VLFGTG	0.259
30	G	28	33	LFGTGV	0.259
31	T	29	34	FGTGVL	0.259
32	G	30	35	GTGVLA	0.303
33	V	31	36	TGVLAA	0.309
34	L	32	37	GVLAAL	0.177
35	A	33	38	VLAALK	0.357
36	A	34	39	LAALKF	0.416
37	L	35	40	AALKFD	0.843
38	K	36	41	ALKFDR	1634
39	F	37	42	LKFDRA	1634
40	D	38	43	KFDRAG	1961
41	R	39	44	FDRAGN	1577
42	A	40	45	DRAGNI	1277
43	G	41	46	RAGNIG	0.756
44	N	42	47	AGNIGY	0.605
45	I	43	48	GNIGYA	0.605
46	G	44	49	NIGYAA	0.618
47	Y	45	50	IGYAAG	0.38
48	A	46	51	GYAAGF	0.47
49	A	47	52	YAAGFW	0.499
50	G	48	53	AAGFWG	0.315
51	F	49	54	AGFWGW	0.328
52	W	50	55	GFWGWG	0.321
53	G	51	56	FWGWGL	0.268
54	W	52	57	WGWGLA	0.312
55	G	53	58	GWGLAL	0.245
56	L	54	59	WGLALG	0.245
57	A	55	60	GLALGM	0.231
58	L	56	61	LALGMG	0.231
59	G	57	62	ALGMGV	0.208
60	M	58	63	LGMGVL	0.169
61	G	59	64	GMGVLV	0.152
62	V	60	65	MGVLVS	0.206
63	L	61	66	GVLVSG	0.206
64	V	62	67	VLVSGG	0.206
65	S	63	68	LVSGGA	0.281
66	G	64	69	VSGGAS	0.457
67	G	65	70	SGGASG	0.609
68	A	66	71	GGASGA	0.459
69	S	67	72	GASGAH	0.631
70	G	68	73	ASGAHL	0.526
71	A	69	74	SGAHLN	0.837
72	H	70	75	GAHLNP	0.966
73	L	71	76	AHLNPS	1308
74	N	72	77	HLNPSI	0.908
75	P	73	78	LNPSIT	0.963
76	S	74	79	NPSITV	0.866
77	I	75	80	PSITVA	0.544
78	T	76	81	SITVAL	0.29
79	V	77	82	ITVALA	0.219
80	A	78	83	TVALAT	0.451
81	L	79	84	VALATI	0.219
82	A	80	85	ALATIG	0.292
83	T	81	86	LATIGK	0.578
84	I	82	87	ATIGKC	0.375
85	G	83	88	TIGKCQ	0.644
86	K	84	89	IGKCQW	0.469
87	C	85	90	GKCQWR	1.31
88	Q	86	91	KCQWRK	2648
89	W	87	92	CQWRKV	0.983
90	R	88	93	QWRKVP	2835
91	K	89	94	WRKVPH	2227
92	V	90	95	RKVPHY	3319
93	P	91	96	KVPHYL	1398
94	H	92	97	VPHYLV	0.519
95	Y	93	98	PHYLVA	0.706
96	L	94	99	HYLVAQ	0.791
97	V	95	100	YLVAQY	0.91
98	A	96	101	LVAQYL	0.479
99	Q	97	102	VAQYLG	0.575
100	Y	98	103	AQYLGA	0.783
101	L	99	104	QYLGAF	0.671
102	G	100	105	YLGAFL	0.319
103	A	101	106	LGAFLG	0.202
104	F	102	107	GAFLGA	0.247
105	L	103	108	AFLGAA	0.252
106	G	104	109	FLGAAV	0.185
107	A	105	110	LGAAVL	0.177
108	A	106	111	GAAVLF	0.185
109	V	107	112	AAVLFL	0.154
110	L	108	113	AVLFLT	0.221
111	F	109	114	VLFLTY	0.342
112	L	110	115	LFLTYK	0.922
113	T	111	116	FLTYKG	1107
114	Y	112	117	LTYKGA	1291
115	K	113	118	TYKGAF	1356
116	G	114	119	YKGAFD	1569
117	A	115	120	KGAFDN	1.61
118	F	116	121	GAFDNY	1261
119	D	117	122	AFDNYD	2129
120	N	118	123	FDNYDG	2085
121	Y	119	124	DNYDGG	2383
122	D	120	125	NYDGGF	1236
123	G	121	126	YDGGFR	1505
124	G	122	127	DGGFRA	0.97
125	F	123	128	GGFRAT	0.839
126	R	124	129	GFRATT	1223
127	A	125	130	FRATTG	1223
128	T	126	131	RATTGV	1048
129	T	127	132	ATTGVN	0.861
130	G	128	133	TTGVNG	0.843
131	V	129	134	TGVNGT	0.843
132	N	130	135	GVNGTA	0.59
133	G	131	136	VNGTAD	0.996
134	T	132	137	NGTADV	0.996
135	A	133	138	GTADVF	0.536
136	D	134	139	TADVFA	0.547
137	V	135	140	ADVFAS	0.508
138	F	136	141	DVFASY	0.788
139	A	137	142	VFASYP	0.73
140	S	138	143	FASYPR	1926
141	Y	139	144	ASYPRD	3715
142	P	140	145	SYPRDF	3185
143	R	141	146	YPRDFV	1764
144	D	142	147	PRDFVG	1114
145	F	143	148	RDFVGT	1.04
146	V	144	149	DFVGTG	0.525
147	G	145	150	FVGTGN	0.506
148	T	146	151	VGTGNC	0.313
149	G	147	152	GTGNCF	0.365
150	N	148	153	TGNCFL	0.304
151	C	149	154	GNCFLD	0.352
152	F	150	155	NCFLDQ	0.617
153	L	151	156	CFLDQV	0.285
154	D	152	157	FLDQVV	0.394
155	Q	153	158	LDQVVG	0.45
156	V	154	159	DQVVGT	0.788
157	V	155	160	QVVGTG	0.467
158	G	156	161	VVGTGL	0.222
159	T	157	162	VGTGLF	0.259
160	G	158	163	GTGLFV	0.259
161	L	159	164	TGLFVM	0.259
162	F	160	165	GLFVMC	0.096
163	V	161	166	LFVMCI	0.068
164	M	162	167	FVMCIV	0.061
165	C	163	168	VMCIVA	0.072
166	I	164	169	MCIVAI	0.068
167	V	165	170	CIVAIT	0.099
168	A	166	171	IVAITD	0.307
169	I	167	172	VAITDN	0.705
170	T	168	173	AITDNH	1293
171	D	169	174	ITDNHN	2059
172	N	170	175	TDNHNM	2906
173	H	171	176	DNHNMA	2034
174	N	172	177	NHNMAV	0.904
175	M	173	178	HNMAVP	0.869
176	A	174	179	NMAVPQ	1107
177	V	175	180	MAVPQG	0.681
178	P	176	181	AVPQGL	0.567
179	Q	177	182	VPQGLQ	0.973
180	G	178	183	PQGLQP	2027
181	L	179	184	QGLQPL	1081
182	Q	180	185	GLQPLL	0.515
183	P	181	186	LQPLLI	0.365
184	L	182	187	QPLLIG	0.438
185	L	183	188	PLLIGL	0.208
186	I	184	189	LLIGLS	0.181
187	G	185	190	LIGLSL	0.181
188	L	186	191	IGLSLA	0.221
189	S	187	192	GLSLAT	0.455
190	L	188	193	LSLATT	0.664
191	A	189	194	SLATTA	0.814
192	T	190	195	LATTAL	0.501
193	T	191	196	ATTALC	0.325
194	A	192	197	TTALCF	0.279
195	L	193	198	TALCFG	0.191
196	C	194	199	ALCFGY	0.208
197	F	195	200	LCFGYN	0.331
198	G	196	201	CFGYNC	0.215
199	Y	197	202	FGYNCG	0.397
200	N	198	203	GYNCGA	0.463
201	C	199	204	YNCGAP	0.723
202	G	200	205	NCGAPL	0.381
203	A	201	206	CGAPLN	0.381
204	P	202	207	GAPLNP	1098
205	L	203	208	APLNPA	1121
206	N	204	209	PLNPAR	2173
207	P	205	210	LNPARD	2347
208	A	206	211	NPARDL	2347
209	R	207	212	PARDLG	1444
210	D	208	213	ARDLGP	1444
211	L	209	214	RDLGPR	2.8
212	G	210	215	DLGPRI	1002
213	P	211	216	LGPRIF	0.52
214	R	212	217	GPRIFT	0.909
215	I	213	218	PRIFTA	0.928
216	F	214	219	RIFTAM	0.594
217	T	215	220	IFTAMA	0.306
218	A	216	221	FTAMAG	0.433
219	M	217	222	TAMAGW	0.525
220	A	218	223	AMAGWG	0.36
221	G	219	224	MAGWGT	0.515
222	W	220	225	AGWGTE	0.9
223	G	221	226	GWGTEV	0.662
224	T	222	227	WGTEVF	0.579
225	E	223	228	GTEVFS	0.738
226	V	224	229	TEVFSF	0.645
227	F	225	230	EVFSFR	0.876
228	S	226	231	VFSFRD	0.845
229	F	227	232	FSFRDY	1783
230	R	228	233	SFRDYN	3312
231	D	229	234	FRDYNW	2599
232	Y	230	235	RDYNWF	2599
233	N	231	236	DYNWFW	1395
234	W	232	237	YNWFWV	0.62
235	F	233	238	NWFWVP	0.612
236	W	234	239	WFWVPV	0.282
237	V	235	240	FWVPVV	0.199
238	P	236	241	WVPVVA	0.233
239	V	237	242	VPVVAP	0.342
240	V	238	243	PVVAPH	0.627
241	A	239	244	VVAPHI	0.284
242	P	240	245	VAPHIG	0.379
243	H	241	246	APHIGA	0.516
244	I	242	247	PHIGAI	0.358
245	G	243	248	HIGAIV	0.172
246	A	244	249	IGAIVG	0.125
247	I	245	250	GAIVGA	0.18
248	V	246	251	AIVGAW	0.191
249	G	247	252	IVGAWL	0.156
250	A	248	253	VGAWLY	0.349
251	W	249	254	GAWLYR	0.921
252	L	250	255	AWLYRL	0.768
253	Y	251	256	WLYRLL	0.627
254	R	252	257	LYRLLV	0.442
255	L	253	258	YRLLVG	0.531
256	L	254	259	RLLVGL	0.279
257	V	255	260	LLVGLH	0.194
258	G	256	261	LVGLHW	0.248
259	L	257	262	VGLHWP	0.464
260	H	258	263	GLHWPQ	1083
261	W	259	264	LHWPQD	1827
262	P	260	265	HWPQDS	2969
263	Q	261	266	WPQDSY	3419
264	D	262	267	PQDSYD	5.43
265	S	263	268	QDSYDM	3476
266	Y	264	269	DSYDME	3476
267	D	265	270	SYDMEQ	3604
268	M	266	271	YDMEQR	5268
269	E	267	272	DMEQRN	5406
270	Q	268	273	MEQRNR	6341
271	R	269	274	EQRNRA	6473
272	N	270	275	QRNRAK	7475
273	R	271	276	RNRAKD	7208
274	A	272	277	NRAKDG	3642
275	K	273	278	RAKDGG	2241
276	D	274	279	AKDGGY	1793
277	G	275	280	KDGGYS	2378
278	G	276	281	DGGYSL	0.981
279	Y	277	282	GGYSLE	1017

## Sheet: BepiPred 2.0 Surf
Entry	Position	AminoAcid	Exposed/Buried	RelativeSurfaceAccessilibity	HelixProbability	SheetProbability	CoilProbability	EpitopeProbability	Assingment
OmAQP23	1	M	E	0.683	0.016	0.005	0.979	0.256666666667
OmAQP23	2	I	E	0.386	0.184	0.043	0.773	0.322555555556
OmAQP23	3	L	E	0.427	0.268	0.043	0.689	0.387222222222
OmAQP23	4	D	E	0.583	0.455	0.046	0.498	0.447666666667
OmAQP23	5	K	E	0.427	0.660	0.049	0.291	0.510555555556	B
OmAQP23	6	V	E	0.387	0.622	0.015	0.363	0.521888888889	B
OmAQP23	7	K	E	0.577	0.522	0.016	0.462	0.545666666667	B
OmAQP23	8	I	B	0.225	0.339	0.016	0.645	0.548111111111	B
OmAQP23	9	K	E	0.355	0.116	0.016	0.868	0.526555555556	B
OmAQP23	10	S	E	0.4	0.782	0.003	0.215	0.512666666667	B
OmAQP23	11	L	E	0.497	0.923	0.002	0.076	0.494555555556
OmAQP23	12	A	B	0.123	0.970	0.001	0.029	0.466
OmAQP23	13	L	B	0.042	0.970	0.001	0.029	0.439555555556
OmAQP23	14	R	B	0.188	0.988	0.000	0.012	0.407
OmAQP23	15	E	E	0.285	0.988	0.000	0.012	0.387555555556
OmAQP23	16	T	B	0.05	0.988	0.000	0.012	0.358111111111
OmAQP23	17	F	B	0.084	0.988	0.000	0.012	0.346111111111
OmAQP23	18	A	B	0.069	0.988	0.000	0.012	0.344444444444
OmAQP23	19	E	B	0.106	0.988	0.000	0.012	0.321444444444
OmAQP23	20	L	B	0.117	0.988	0.000	0.012	0.305333333333
OmAQP23	21	L	B	0.187	0.988	0.000	0.012	0.297444444444
OmAQP23	22	G	B	0.119	0.988	0.000	0.012	0.292444444444
OmAQP23	23	T	B	0.139	0.988	0.000	0.012	0.285888888889
OmAQP23	24	F	B	0.166	0.988	0.000	0.012	0.278444444444
OmAQP23	25	V	E	0.281	0.988	0.000	0.012	0.276555555556
OmAQP23	26	L	B	0.159	0.988	0.000	0.012	0.263888888889
OmAQP23	27	V	B	0.127	0.988	0.000	0.012	0.260333333333
OmAQP23	28	L	B	0.189	0.970	0.001	0.029	0.264222222222
OmAQP23	29	F	B	0.217	0.970	0.001	0.029	0.256666666667
OmAQP23	30	G	B	0.134	0.970	0.001	0.029	0.264333333333
OmAQP23	31	T	B	0.121	0.923	0.002	0.076	0.267777777778
OmAQP23	32	G	B	0.077	0.923	0.002	0.076	0.279111111111
OmAQP23	33	V	B	0.066	0.938	0.007	0.055	0.293888888889
OmAQP23	34	L	B	0.067	0.878	0.010	0.111	0.321333333333
OmAQP23	35	A	B	0.04	0.802	0.014	0.185	0.353
OmAQP23	36	A	B	0.116	0.751	0.050	0.199	0.395333333333
OmAQP23	37	L	B	0.16	0.561	0.047	0.393	0.432444444444
OmAQP23	38	K	B	0.248	0.386	0.097	0.517	0.479777777778
OmAQP23	39	F	E	0.288	0.184	0.043	0.773	0.514111111111	B
OmAQP23	40	D	E	0.347	0.113	0.043	0.844	0.547777777778	B
OmAQP23	41	R	E	0.582	0.058	0.017	0.925	0.573111111111	B
OmAQP23	42	A	E	0.482	0.018	0.019	0.964	0.587333333333	B
OmAQP23	43	G	E	0.573	0.058	0.017	0.925	0.583111111111	B
OmAQP23	44	N	E	0.464	0.058	0.017	0.925	0.567666666667	B
OmAQP23	45	I	B	0.215	0.176	0.004	0.820	0.541222222222	B
OmAQP23	46	G	B	0.243	0.246	0.004	0.750	0.513333333333	B
OmAQP23	47	Y	B	0.143	0.694	0.003	0.303	0.485222222222
OmAQP23	48	A	B	0.097	0.802	0.014	0.185	0.464888888889
OmAQP23	49	A	B	0.141	0.878	0.010	0.111	0.435555555556
OmAQP23	50	G	B	0.109	0.938	0.007	0.055	0.416
OmAQP23	51	F	B	0.099	0.970	0.001	0.029	0.393
OmAQP23	52	W	B	0.243	0.970	0.001	0.029	0.383
OmAQP23	53	G	B	0.189	0.970	0.001	0.029	0.376888888889
OmAQP23	54	W	B	0.23	0.970	0.001	0.029	0.368222222222
OmAQP23	55	G	B	0.202	0.988	0.000	0.012	0.351666666667
OmAQP23	56	L	E	0.295	0.988	0.000	0.012	0.340555555556
OmAQP23	57	A	B	0.225	0.970	0.001	0.029	0.321888888889
OmAQP23	58	L	B	0.174	0.970	0.001	0.029	0.320111111111
OmAQP23	59	G	B	0.163	0.970	0.001	0.029	0.312777777778
OmAQP23	60	M	B	0.231	0.970	0.001	0.029	0.310888888889
OmAQP23	61	G	B	0.141	0.970	0.001	0.029	0.301333333333
OmAQP23	62	V	B	0.11	0.938	0.007	0.055	0.310555555556
OmAQP23	63	L	B	0.144	0.938	0.007	0.055	0.328888888889
OmAQP23	64	V	B	0.151	0.878	0.010	0.111	0.354888888889
OmAQP23	65	S	B	0.058	0.802	0.014	0.185	0.371444444444
OmAQP23	66	G	B	0.178	0.502	0.002	0.495	0.392
OmAQP23	67	G	E	0.346	0.321	0.003	0.675	0.404111111111
OmAQP23	68	A	B	0.149	0.176	0.004	0.820	0.416222222222
OmAQP23	69	S	B	0.076	0.053	0.004	0.942	0.424111111111
OmAQP23	70	G	B	0.157	0.058	0.017	0.925	0.427777777778
OmAQP23	71	A	B	0.065	0.018	0.019	0.964	0.415444444444
OmAQP23	72	H	B	0.074	0.053	0.043	0.903	0.393777777778
OmAQP23	73	L	B	0.032	0.113	0.043	0.844	0.366888888889
OmAQP23	74	N	B	0.053	0.058	0.017	0.925	0.338666666667
OmAQP23	75	P	B	0.043	0.782	0.003	0.215	0.310111111111
OmAQP23	76	S	B	0.03	0.923	0.002	0.076	0.282888888889
OmAQP23	77	I	B	0.046	0.878	0.010	0.111	0.264555555556
OmAQP23	78	T	B	0.03	0.878	0.010	0.111	0.246666666667
OmAQP23	79	V	B	0.03	0.970	0.001	0.029	0.247555555556
OmAQP23	80	A	B	0.047	0.988	0.000	0.012	0.259111111111
OmAQP23	81	L	B	0.072	0.988	0.000	0.012	0.284
OmAQP23	82	A	B	0.066	0.970	0.001	0.029	0.321666666667
OmAQP23	83	T	B	0.078	0.970	0.001	0.029	0.352222222222
OmAQP23	84	I	B	0.225	0.859	0.002	0.139	0.395777777778
OmAQP23	85	G	E	0.398	0.321	0.003	0.675	0.430111111111
OmAQP23	86	K	E	0.478	0.109	0.005	0.886	0.469888888889
OmAQP23	87	C	B	0.11	0.053	0.004	0.942	0.505	B
OmAQP23	88	Q	E	0.484	0.109	0.005	0.886	0.506333333333	B
OmAQP23	89	W	B	0.261	0.246	0.004	0.750	0.502777777778	B
OmAQP23	90	R	E	0.342	0.246	0.004	0.750	0.501555555556	B
OmAQP23	91	K	B	0.271	0.257	0.016	0.727	0.479555555556
OmAQP23	92	V	B	0.051	0.561	0.047	0.393	0.453333333333
OmAQP23	93	P	B	0.088	0.802	0.014	0.185	0.417777777778
OmAQP23	94	H	B	0.157	0.878	0.010	0.111	0.389333333333
OmAQP23	95	Y	B	0.135	0.938	0.007	0.055	0.359
OmAQP23	96	L	B	0.112	0.975	0.003	0.022	0.338333333333
OmAQP23	97	V	B	0.205	0.970	0.001	0.029	0.337111111111
OmAQP23	98	A	B	0.104	0.970	0.001	0.029	0.325111111111
OmAQP23	99	Q	B	0.124	0.970	0.001	0.029	0.296555555556
OmAQP23	100	Y	B	0.179	0.970	0.001	0.029	0.291666666667
OmAQP23	101	L	B	0.222	0.970	0.001	0.029	0.294888888889
OmAQP23	102	G	B	0.118	0.970	0.001	0.029	0.286666666667
OmAQP23	103	A	B	0.075	0.988	0.000	0.012	0.285
OmAQP23	104	F	B	0.172	0.988	0.000	0.012	0.275888888889
OmAQP23	105	L	B	0.164	0.988	0.000	0.012	0.269222222222
OmAQP23	106	G	B	0.056	0.988	0.000	0.012	0.253333333333
OmAQP23	107	A	B	0.073	0.988	0.000	0.012	0.255888888889
OmAQP23	108	A	B	0.171	0.970	0.001	0.029	0.266555555556
OmAQP23	109	V	B	0.115	0.970	0.001	0.029	0.265777777778
OmAQP23	110	L	B	0.037	0.970	0.001	0.029	0.269
OmAQP23	111	F	B	0.143	0.938	0.007	0.055	0.298888888889
OmAQP23	112	L	B	0.182	0.878	0.010	0.111	0.321888888889
OmAQP23	113	T	B	0.117	0.802	0.014	0.185	0.35
OmAQP23	114	Y	B	0.092	0.502	0.002	0.495	0.369111111111
OmAQP23	115	K	B	0.257	0.502	0.002	0.495	0.408666666667
OmAQP23	116	G	E	0.447	0.502	0.002	0.495	0.440777777778
OmAQP23	117	A	B	0.283	0.502	0.002	0.495	0.464222222222
OmAQP23	118	F	B	0.11	0.622	0.015	0.363	0.504	B
OmAQP23	119	D	E	0.436	0.622	0.015	0.363	0.543	B
OmAQP23	120	N	E	0.508	0.522	0.016	0.462	0.554555555556	B
OmAQP23	121	Y	B	0.206	0.430	0.016	0.555	0.575777777778	B
OmAQP23	122	D	E	0.377	0.257	0.016	0.727	0.600777777778	B
OmAQP23	123	G	E	0.427	0.113	0.043	0.844	0.599444444444	B
OmAQP23	124	G	E	0.371	0.113	0.087	0.800	0.603	B
OmAQP23	125	F	B	0.306	0.118	0.150	0.732	0.612	B
OmAQP23	126	R	E	0.339	0.118	0.150	0.732	0.619111111111	B
OmAQP23	127	A	B	0.209	0.118	0.150	0.732	0.619111111111	B
OmAQP23	128	T	E	0.382	0.118	0.150	0.732	0.631	B
OmAQP23	129	T	E	0.401	0.113	0.087	0.800	0.627666666667	B
OmAQP23	130	G	E	0.358	0.113	0.043	0.844	0.611111111111	B
OmAQP23	131	V	E	0.408	0.116	0.016	0.868	0.584555555556	B
OmAQP23	132	N	E	0.495	0.116	0.016	0.868	0.587222222222	B
OmAQP23	133	G	B	0.18	0.113	0.043	0.844	0.567666666667	B
OmAQP23	134	T	B	0.254	0.064	0.216	0.721	0.527888888889	B
OmAQP23	135	A	B	0.186	0.064	0.216	0.721	0.495333333333
OmAQP23	136	D	B	0.197	0.018	0.141	0.840	0.452777777778
OmAQP23	137	V	B	0.091	0.022	0.359	0.619	0.418
OmAQP23	138	F	B	0.059	0.022	0.552	0.426	0.404333333333
OmAQP23	139	A	B	0.037	0.022	0.552	0.426	0.407777777778
OmAQP23	140	S	B	0.059	0.022	0.552	0.426	0.422555555556
OmAQP23	141	Y	B	0.155	0.022	0.552	0.426	0.434444444444
OmAQP23	142	P	B	0.166	0.021	0.279	0.699	0.446888888889
OmAQP23	143	R	B	0.167	0.018	0.141	0.840	0.462777777778
OmAQP23	144	D	E	0.295	0.018	0.088	0.893	0.482444444444
OmAQP23	145	F	E	0.391	0.052	0.084	0.864	0.500666666667	B
OmAQP23	146	V	B	0.132	0.052	0.084	0.864	0.503111111111	B
OmAQP23	147	G	B	0.119	0.113	0.043	0.844	0.499555555556
OmAQP23	148	T	B	0.188	0.455	0.046	0.498	0.484222222222
OmAQP23	149	G	B	0.152	0.430	0.016	0.555	0.452555555556
OmAQP23	150	N	B	0.17	0.430	0.016	0.555	0.426777777778
OmAQP23	151	C	B	0.081	0.622	0.015	0.363	0.410888888889
OmAQP23	152	F	B	0.074	0.751	0.050	0.199	0.397333333333
OmAQP23	153	L	B	0.165	0.911	0.033	0.057	0.381555555556
OmAQP23	154	D	B	0.173	0.938	0.007	0.055	0.364222222222
OmAQP23	155	Q	B	0.082	0.975	0.003	0.022	0.347
OmAQP23	156	V	B	0.128	0.975	0.003	0.022	0.334777777778
OmAQP23	157	V	B	0.169	0.975	0.003	0.022	0.333888888889
OmAQP23	158	G	B	0.108	0.975	0.003	0.022	0.333333333333
OmAQP23	159	T	B	0.086	0.970	0.001	0.029	0.320777777778
OmAQP23	160	G	B	0.172	0.988	0.000	0.012	0.301888888889
OmAQP23	161	L	B	0.21	0.988	0.000	0.012	0.283222222222
OmAQP23	162	F	B	0.129	0.970	0.001	0.029	0.260333333333
OmAQP23	163	V	B	0.103	0.970	0.001	0.029	0.244222222222
OmAQP23	164	M	B	0.216	0.975	0.003	0.022	0.238222222222
OmAQP23	165	C	B	0.083	0.938	0.007	0.055	0.228
OmAQP23	166	I	B	0.068	0.938	0.007	0.055	0.215888888889
OmAQP23	167	V	B	0.067	0.911	0.033	0.057	0.229
OmAQP23	168	A	B	0.079	0.870	0.077	0.053	0.27
OmAQP23	169	I	B	0.036	0.701	0.107	0.192	0.317666666667
OmAQP23	170	T	B	0.065	0.428	0.171	0.402	0.375666666667
OmAQP23	171	D	B	0.17	0.191	0.086	0.723	0.437333333333
OmAQP23	172	N	E	0.501	0.181	0.017	0.803	0.496666666667
OmAQP23	173	H	E	0.546	0.053	0.004	0.942	0.542444444444	B
OmAQP23	174	N	E	0.415	0.116	0.016	0.868	0.586	B
OmAQP23	175	M	E	0.497	0.058	0.017	0.925	0.631222222222	B
OmAQP23	176	A	E	0.477	0.058	0.017	0.925	0.651	B
OmAQP23	177	V	E	0.356	0.058	0.017	0.925	0.643444444444	B
OmAQP23	178	P	E	0.343	0.058	0.017	0.925	0.630222222222	B
OmAQP23	179	Q	E	0.504	0.058	0.017	0.925	0.610777777778	B
OmAQP23	180	G	E	0.361	0.109	0.005	0.886	0.576444444444	B
OmAQP23	181	L	B	0.244	0.246	0.004	0.750	0.535666666667	B
OmAQP23	182	Q	B	0.266	0.522	0.016	0.462	0.503111111111	B
OmAQP23	183	P	B	0.171	0.622	0.015	0.363	0.470222222222
OmAQP23	184	L	B	0.165	0.779	0.101	0.120	0.426
OmAQP23	185	L	B	0.176	0.779	0.101	0.120	0.399
OmAQP23	186	I	B	0.228	0.870	0.077	0.053	0.379888888889
OmAQP23	187	G	B	0.218	0.950	0.028	0.022	0.354111111111
OmAQP23	188	L	E	0.275	0.975	0.003	0.022	0.330444444444
OmAQP23	189	S	B	0.231	0.975	0.003	0.022	0.317111111111
OmAQP23	190	L	E	0.312	0.970	0.001	0.029	0.321111111111
OmAQP23	191	A	B	0.208	0.970	0.001	0.029	0.316222222222
OmAQP23	192	T	B	0.188	0.970	0.001	0.029	0.316444444444
OmAQP23	193	T	B	0.202	0.923	0.002	0.076	0.328555555556
OmAQP23	194	A	B	0.2	0.938	0.007	0.055	0.317333333333
OmAQP23	195	L	B	0.144	0.938	0.007	0.055	0.316555555556
OmAQP23	196	C	B	0.12	0.878	0.010	0.111	0.334111111111
OmAQP23	197	F	B	0.111	0.802	0.014	0.185	0.342444444444
OmAQP23	198	G	B	0.072	0.717	0.014	0.269	0.361
OmAQP23	199	Y	B	0.229	0.622	0.015	0.363	0.366333333333
OmAQP23	200	N	B	0.236	0.522	0.016	0.462	0.374777777778
OmAQP23	201	C	B	0.078	0.246	0.004	0.750	0.387666666667
OmAQP23	202	G	B	0.116	0.116	0.016	0.868	0.396111111111
OmAQP23	203	A	B	0.12	0.058	0.017	0.925	0.406666666667
OmAQP23	204	P	B	0.069	0.053	0.043	0.903	0.395666666667
OmAQP23	205	L	B	0.04	0.113	0.087	0.800	0.390222222222
OmAQP23	206	N	B	0.069	0.184	0.043	0.773	0.394555555556
OmAQP23	207	P	B	0.081	0.522	0.016	0.462	0.380555555556
OmAQP23	208	A	B	0.036	0.600	0.003	0.397	0.369111111111
OmAQP23	209	R	B	0.128	0.502	0.002	0.495	0.360555555556
OmAQP23	210	D	B	0.122	0.502	0.002	0.495	0.355666666667
OmAQP23	211	L	B	0.064	0.694	0.003	0.303	0.329333333333
OmAQP23	212	G	B	0.033	0.782	0.003	0.215	0.314444444444
OmAQP23	213	P	B	0.091	0.923	0.002	0.076	0.309333333333
OmAQP23	214	R	B	0.136	0.970	0.001	0.029	0.294666666667
OmAQP23	215	I	B	0.062	0.923	0.002	0.076	0.283888888889
OmAQP23	216	F	B	0.033	0.923	0.002	0.076	0.289888888889
OmAQP23	217	T	B	0.079	0.938	0.007	0.055	0.307666666667
OmAQP23	218	A	B	0.088	0.878	0.010	0.111	0.330444444444
OmAQP23	219	M	B	0.13	0.802	0.014	0.185	0.349111111111
OmAQP23	220	A	B	0.092	0.717	0.014	0.269	0.393333333333
OmAQP23	221	G	B	0.216	0.430	0.016	0.555	0.437111111111
OmAQP23	222	W	B	0.195	0.339	0.016	0.645	0.476888888889
OmAQP23	223	G	E	0.381	0.246	0.004	0.750	0.512333333333	B
OmAQP23	224	T	E	0.425	0.181	0.017	0.803	0.547222222222	B
OmAQP23	225	E	E	0.556	0.181	0.017	0.803	0.568888888889	B
OmAQP23	226	V	E	0.311	0.116	0.016	0.868	0.591555555556	B
OmAQP23	227	F	B	0.174	0.058	0.017	0.925	0.597666666667	B
OmAQP23	228	S	E	0.471	0.058	0.017	0.925	0.597555555556	B
OmAQP23	229	F	E	0.502	0.058	0.017	0.925	0.592111111111	B
OmAQP23	230	R	E	0.469	0.018	0.019	0.964	0.577888888889	B
OmAQP23	231	D	E	0.363	0.018	0.019	0.964	0.562666666667	B
OmAQP23	232	Y	B	0.146	0.018	0.019	0.964	0.550222222222	B
OmAQP23	233	N	B	0.281	0.018	0.047	0.935	0.507111111111	B
OmAQP23	234	W	B	0.176	0.118	0.150	0.732	0.474666666667
OmAQP23	235	F	B	0.067	0.231	0.330	0.439	0.427
OmAQP23	236	W	B	0.142	0.453	0.248	0.299	0.388777777778
OmAQP23	237	V	B	0.081	0.725	0.163	0.112	0.354888888889
OmAQP23	238	P	B	0.1	0.751	0.050	0.199	0.324777777778
OmAQP23	239	V	B	0.125	0.831	0.044	0.125	0.309555555556
OmAQP23	240	V	B	0.173	0.911	0.033	0.057	0.295
OmAQP23	241	A	B	0.098	0.802	0.014	0.185	0.270444444444
OmAQP23	242	P	B	0.12	0.859	0.002	0.139	0.273
OmAQP23	243	H	B	0.22	0.970	0.001	0.029	0.277555555556
OmAQP23	244	I	B	0.252	0.970	0.001	0.029	0.281111111111
OmAQP23	245	G	B	0.112	0.970	0.001	0.029	0.285111111111
OmAQP23	246	A	B	0.092	0.988	0.000	0.012	0.297888888889
OmAQP23	247	I	B	0.227	0.988	0.000	0.012	0.316777777778
OmAQP23	248	V	B	0.205	0.988	0.000	0.012	0.319111111111
OmAQP23	249	G	B	0.106	0.988	0.000	0.012	0.325333333333
OmAQP23	250	A	B	0.12	0.970	0.001	0.029	0.346777777778
OmAQP23	251	W	B	0.245	0.970	0.001	0.029	0.364222222222
OmAQP23	252	L	B	0.113	0.970	0.001	0.029	0.352555555556
OmAQP23	253	Y	B	0.093	0.970	0.001	0.029	0.370666666667
OmAQP23	254	R	E	0.301	0.970	0.001	0.029	0.396444444444
OmAQP23	255	L	B	0.185	0.923	0.002	0.076	0.427111111111
OmAQP23	256	L	B	0.044	0.859	0.002	0.139	0.442
OmAQP23	257	V	B	0.12	0.717	0.014	0.269	0.459111111111
OmAQP23	258	G	B	0.237	0.339	0.016	0.645	0.485111111111
OmAQP23	259	L	B	0.287	0.109	0.005	0.886	0.507444444444	B
OmAQP23	260	H	E	0.591	0.053	0.004	0.942	0.523777777778	B
OmAQP23	261	W	B	0.264	0.016	0.005	0.979	0.565	B
OmAQP23	262	P	E	0.533	0.018	0.019	0.964	0.581	B
OmAQP23	263	Q	E	0.534	0.058	0.017	0.925	0.588333333333	B
OmAQP23	264	D	E	0.686	0.058	0.017	0.925	0.581333333333	B
OmAQP23	265	S	E	0.658	0.058	0.017	0.925	0.584777777778	B
OmAQP23	266	Y	E	0.307	0.181	0.017	0.803	0.592	B
OmAQP23	267	D	E	0.589	0.257	0.016	0.727	0.593777777778	B
OmAQP23	268	M	E	0.336	0.430	0.016	0.555	0.589888888889	B
OmAQP23	269	E	E	0.638	0.561	0.047	0.393	0.592	B
OmAQP23	270	Q	E	0.537	0.561	0.047	0.393	0.591888888889	B
OmAQP23	271	R	E	0.49	0.502	0.102	0.396	0.599666666667	B
OmAQP23	272	N	E	0.495	0.502	0.102	0.396	0.602111111111	B
OmAQP23	273	R	E	0.4	0.428	0.171	0.402	0.612222222222	B
OmAQP23	274	A	E	0.335	0.428	0.171	0.402	0.606	B
OmAQP23	275	K	E	0.516	0.278	0.093	0.628	0.599555555556	B
OmAQP23	276	D	E	0.735	0.184	0.043	0.773	0.590333333333	B
OmAQP23	277	G	E	0.626	0.116	0.016	0.868	0.575555555556	B
OmAQP23	278	G	E	0.654	0.053	0.043	0.903	0.569888888889	B
OmAQP23	279	Y	E	0.341	0.018	0.088	0.893	0.504333333333	B
OmAQP23	280	S	E	0.583	0.018	0.088	0.893	0.433444444444
OmAQP23	281	L	E	0.429	0.018	0.088	0.893	0.368333333333
OmAQP23	282	E	E	0.893	0.003	0.003	0.994	0.296777777778

## Sheet: Chou_Fasman (turns)
Position	Residue	Start	End	Peptide	Score
4	D	1	7	MILDKVK	0.806
5	K	2	8	ILDKVKI	0.787
6	V	3	9	LDKVKIK	0.864
7	K	4	10	DKVKIKS	0.984
8	I	5	11	KVKIKSL	0.86
9	K	6	12	VKIKSLA	0.81
10	S	7	13	KIKSLAL	0.823
11	L	8	14	IKSLALR	0.814
12	A	9	15	KSLALRE	0.853
13	L	10	16	SLALRET	0.846
14	R	11	17	LALRETF	0.727
15	E	12	18	ALRETFA	0.737
16	T	13	19	LRETFAE	0.749
17	F	14	20	RETFAEL	0.749
18	A	15	21	ETFAELL	0.697
19	E	16	22	TFAELLG	0.814
20	L	17	23	FAELLGT	0.814
21	L	18	24	AELLGTF	0.814
22	G	19	25	ELLGTFV	0.791
23	T	20	26	LLGTFVL	0.77
24	F	21	27	LGTFVLV	0.757
25	V	22	28	GTFVLVL	0.757
26	L	23	29	TFVLVLF	0.62
27	V	24	30	FVLVLFG	0.706
28	L	25	31	VLVLFGT	0.757
29	F	26	32	LVLFGTG	0.909
30	G	27	33	VLFGTGV	0.896
31	T	28	34	LFGTGVL	0.909
32	G	29	35	FGTGVLA	0.919
33	V	30	36	GTGVLAA	0.927
34	L	31	37	TGVLAAL	0.789
35	A	32	38	GVLAALK	0.796
36	A	33	39	VLAALKF	0.659
37	L	34	40	LAALKFD	0.796
38	K	35	41	AALKFDR	0.847
39	F	36	42	ALKFDRA	0.847
40	D	37	43	LKFDRAG	0.976
41	R	38	44	KFDRAGN	1114
42	A	39	45	FDRAGNI	1037
43	G	40	46	DRAGNIG	1174
44	N	41	47	RAGNIGY	1129
45	I	42	48	AGNIGYA	1087
46	G	43	49	GNIGYAA	1087
47	Y	44	50	NIGYAAG	1087
48	A	45	51	IGYAAGF	0.95
49	A	46	52	GYAAGFW	1.02
50	G	47	53	YAAGFWG	1.02
51	F	48	54	AAGFWGW	0.994
52	W	49	55	AGFWGWG	1123
53	G	50	56	GFWGWGL	1113
54	W	51	57	FWGWGLA	0.984
55	G	52	58	WGWGLAL	0.983
56	L	53	59	GWGLALG	1069
57	A	54	60	WGLALGM	0.931
58	L	55	61	GLALGMG	1017
59	G	56	62	LALGMGV	0.866
60	M	57	63	ALGMGVL	0.866
61	G	58	64	LGMGVLV	0.843
62	V	59	65	GMGVLVS	0.963
63	L	60	66	MGVLVSG	0.963
64	V	61	67	GVLVSGG	1.1
65	S	62	68	VLVSGGA	0.971
66	G	63	69	LVSGGAS	1104
67	G	64	70	VSGGASG	1243
68	A	65	71	SGGASGA	1266
69	S	66	72	GGASGAH	1197
70	G	67	73	GASGAHL	1059
71	A	68	74	ASGAHLN	1059
72	H	69	75	SGAHLNP	1181
73	L	70	76	GAHLNPS	1181
74	N	71	77	AHLNPSI	1026
75	P	72	78	HLNPSIT	1069
76	S	73	79	LNPSITV	1004
77	I	74	80	NPSITVA	1014
78	T	75	81	PSITVAL	0.876
79	V	76	82	SITVALA	0.753
80	A	77	83	ITVALAT	0.686
81	L	78	84	TVALATI	0.686
82	A	79	85	VALATIG	0.771
83	T	80	86	ALATIGK	0.844
84	I	81	87	LATIGKC	0.92
85	G	82	88	ATIGKCQ	0.976
86	K	83	89	TIGKCQW	1019
87	C	84	90	IGKCQWR	1017
88	Q	85	91	GKCQWRK	1094
89	W	86	92	KCQWRKV	0.943
90	R	87	93	CQWRKVP	1016
91	K	88	94	QWRKVPH	0.981
92	V	89	95	WRKVPHY	1004
93	P	90	96	RKVPHYL	0.951
94	H	91	97	KVPHYLV	0.887
95	Y	92	98	VPHYLVA	0.837
96	L	93	99	PHYLVAQ	0.906
97	V	94	100	HYLVAQY	0.851
98	A	95	101	YLVAQYL	0.8
99	Q	96	102	LVAQYLG	0.86
100	Y	97	103	VAQYLGA	0.87
101	L	98	104	AQYLGAF	0.884
102	G	99	105	QYLGAFL	0.874
103	A	100	106	YLGAFLG	0.957
104	F	101	107	LGAFLGA	0.889
105	L	102	108	GAFLGAA	0.899
106	G	103	109	AFLGAAV	0.747
107	A	104	110	FLGAAVL	0.737
108	A	105	111	LGAAVLF	0.737
109	V	106	112	GAAVLFL	0.737
110	L	107	113	AAVLFLT	0.651
111	F	108	114	AVLFLTY	0.72
112	L	109	115	VLFLTYK	0.77
113	T	110	116	LFLTYKG	0.921
114	Y	111	117	FLTYKGA	0.931
115	K	112	118	LTYKGAF	0.931
116	G	113	119	TYKGAFD	1056
117	A	114	120	YKGAFDN	1141
118	F	115	121	KGAFDNY	1141
119	D	116	122	GAFDNYD	1206
120	N	117	123	AFDNYDG	1206
121	Y	118	124	FDNYDGG	1334
122	D	119	125	DNYDGGF	1334
123	G	120	126	NYDGGFR	1261
124	G	121	127	YDGGFRA	1133
125	F	122	128	DGGFRAT	1107
126	R	123	129	GGFRATT	1036
127	A	124	130	GFRATTG	1036
128	T	125	131	FRATTGV	0.884
129	T	126	132	RATTGVN	1021
130	G	127	133	ATTGVNG	1109
131	V	128	134	TTGVNGT	1151
132	N	129	135	TGVNGTA	1109
133	G	130	136	GVNGTAD	1.18
134	T	131	137	VNGTADV	1029
135	A	132	138	NGTADVF	1043
136	D	133	139	GTADVFA	0.914
137	V	134	140	TADVFAS	0.896
138	F	135	141	ADVFASY	0.921
139	A	136	142	DVFASYP	1044
140	S	137	143	VFASYPR	0.971
141	Y	138	144	FASYPRD	1109
142	P	139	145	ASYPRDF	1109
143	R	140	146	SYPRDFV	1086
144	D	141	147	YPRDFVG	1104
145	F	142	148	PRDFVGT	1079
146	V	143	149	RDFVGTG	1084
147	G	144	150	DFVGTGN	1171
148	T	145	151	FVGTGNC	1133
149	G	146	152	VGTGNCF	1133
150	N	147	153	GTGNCFL	1146
151	C	148	154	TGNCFLD	1131
152	F	149	155	GNCFLDQ	1134
153	L	150	156	NCFLDQV	0.983
154	D	151	157	CFLDQVV	0.831
155	Q	152	158	FLDQVVG	0.884
156	V	153	159	LDQVVGT	0.936
157	V	154	160	DQVVGTG	1074
158	G	155	161	QVVGTGL	0.95
159	T	156	162	VVGTGLF	0.896
160	G	157	163	VGTGLFV	0.896
161	L	158	164	GTGLFVM	0.91
162	F	159	165	TGLFVMC	0.857
163	V	160	166	GLFVMCI	0.787
164	M	161	167	LFVMCIV	0.636
165	C	162	168	FVMCIVA	0.646
166	I	163	169	VMCIVAI	0.627
167	V	164	170	MCIVAIT	0.693
168	A	165	171	CIVAITD	0.816
169	I	166	172	IVAITDN	0.869
170	T	167	173	VAITDNH	0.937
171	D	168	174	AITDNHN	1089
172	N	169	175	ITDNHNM	1.08
173	H	170	176	TDNHNMA	1107
174	N	171	177	DNHNMAV	1041
175	M	172	178	NHNMAVP	1.05
176	A	173	179	HNMAVPQ	0.967
177	V	174	180	NMAVPQG	1054
178	P	175	181	MAVPQGL	0.916
179	Q	176	182	AVPQGLQ	0.97
180	G	177	183	VPQGLQP	1093
181	L	178	184	PQGLQPL	1106
182	Q	179	185	QGLQPLL	0.973
183	P	180	186	GLQPLLI	0.9
184	L	181	187	LQPLLIG	0.9
185	L	182	188	QPLLIGL	0.9
186	I	183	189	PLLIGLS	0.964
187	G	184	190	LLIGLSL	0.831
188	L	185	191	LIGLSLA	0.841
189	S	186	192	IGLSLAT	0.894
190	L	187	193	GLSLATT	0.964
191	A	188	194	LSLATTA	0.836
192	T	189	195	SLATTAL	0.836
193	T	190	196	LATTALC	0.801
194	A	191	197	ATTALCF	0.803
195	L	192	198	TTALCFG	0.931
196	C	193	199	TALCFGY	0.957
197	F	194	200	ALCFGYN	1043
198	G	195	201	LCFGYNC	1119
199	Y	196	202	CFGYNCG	1257
200	N	197	203	FGYNCGA	1181
201	C	198	204	GYNCGAP	1313
202	G	199	205	YNCGAPL	1174
203	A	200	206	NCGAPLN	1234
204	P	201	207	CGAPLNP	1229
205	L	202	208	GAPLNPA	1153
206	N	203	209	APLNPAR	1066
207	P	204	210	PLNPARD	1.18
208	A	205	211	LNPARDL	1047
209	R	206	212	NPARDLG	1186
210	D	207	213	PARDLGP	1.18
211	L	208	214	ARDLGPR	1099
212	G	209	215	RDLGPRI	1071
213	P	210	216	DLGPRIF	1021
214	R	211	217	LGPRIFT	0.95
215	I	212	218	GPRIFTA	0.96
216	F	213	219	PRIFTAM	0.823
217	T	214	220	RIFTAMA	0.7
218	A	215	221	IFTAMAG	0.787
219	M	216	222	FTAMAGW	0.857
220	A	217	223	TAMAGWG	0.994
221	G	218	224	AMAGWGT	0.994
222	W	219	225	MAGWGTE	1006
223	G	220	226	AGWGTEV	0.991
224	T	221	227	GWGTEVF	0.983
225	E	222	228	WGTEVFS	0.964
226	V	223	229	GTEVFSF	0.913
227	F	224	230	TEVFSFR	0.826
228	S	225	231	EVFSFRD	0.897
229	F	226	232	VFSFRDY	0.954
230	R	227	233	FSFRDYN	1106
231	D	228	234	SFRDYNW	1157
232	Y	229	235	FRDYNWF	1039
233	N	230	236	RDYNWFW	1.09
234	W	231	237	DYNWFWV	1026
235	F	232	238	YNWFWVP	1034
236	W	233	239	NWFWVPV	0.943
237	V	234	240	WFWVPVV	0.791
238	P	235	241	FWVPVVA	0.749
239	V	236	242	WVPVVAP	0.88
240	V	237	243	VPVVAPH	0.879
241	A	238	244	PVVAPHI	0.874
242	P	239	245	VVAPHIG	0.88
243	H	240	246	VAPHIGA	0.903
244	I	241	247	APHIGAI	0.899
245	G	242	248	PHIGAIV	0.876
246	A	243	249	HIGAIVG	0.881
247	I	244	250	IGAIVGA	0.84
248	V	245	251	GAIVGAW	0.91
249	G	246	252	AIVGAWL	0.771
250	A	247	253	IVGAWLY	0.84
251	W	248	254	VGAWLYR	0.909
252	L	249	255	GAWLYRL	0.921
253	Y	250	256	AWLYRLL	0.783
254	R	251	257	WLYRLLV	0.76
255	L	252	258	LYRLLVG	0.846
256	L	253	259	YRLLVGL	0.846
257	V	254	260	RLLVGLH	0.819
258	G	255	261	LLVGLHW	0.82
259	L	256	262	LVGLHWP	0.953
260	H	257	263	VGLHWPQ	1009
261	W	258	264	GLHWPQD	1146
262	P	259	265	LHWPQDS	1127
263	Q	260	266	HWPQDSY	1206
264	D	261	267	WPQDSYD	1279
265	S	262	268	PQDSYDM	1227
266	Y	263	269	QDSYDME	1116
267	D	264	270	DSYDMEQ	1116
268	M	265	271	SYDMEQR	1043
269	E	266	272	YDMEQRN	1061
270	Q	267	273	DMEQRNR	1034
271	R	268	274	MEQRNRA	0.92
272	N	269	275	EQRNRAK	0.979
273	R	270	276	QRNRAKD	1081
274	A	271	277	RNRAKDG	1164
275	K	272	278	NRAKDGG	1251
276	D	273	279	RAKDGGY	1191
277	G	274	280	AKDGGYS	1.26
278	G	275	281	KDGGYSL	1.25
279	Y	276	282	DGGYSLE	1211

## Sheet: Karplus (flex.)
Position	Residue	Start	End	Peptide	Score
4	D	1	7	MILDKVK	1012
5	K	2	8	ILDKVKI	1028
6	V	3	9	LDKVKIK	1036
7	K	4	10	DKVKIKS	1.04
8	I	5	11	KVKIKSL	1033
9	K	6	12	VKIKSLA	1024
10	S	7	13	KIKSLAL	1008
11	L	8	14	IKSLALR	0.986
12	A	9	15	KSLALRE	0.979
13	L	10	16	SLALRET	0.988
14	R	11	17	LALRETF	1002
15	E	12	18	ALRETFA	1012
16	T	13	19	LRETFAE	1004
17	F	14	20	RETFAEL	0.98
18	A	15	21	ETFAELL	0.962
19	E	16	22	TFAELLG	0.956
20	L	17	23	FAELLGT	0.967
21	L	18	24	AELLGTF	0.98
22	G	19	25	ELLGTFV	0.987
23	T	20	26	LLGTFVL	0.981
24	F	21	27	LGTFVLV	0.959
25	V	22	28	GTFVLVL	0.94
26	L	23	29	TFVLVLF	0.924
27	V	24	30	FVLVLFG	0.924
28	L	25	31	VLVLFGT	0.942
29	F	26	32	LVLFGTG	0.967
30	G	27	33	VLFGTGV	0.993
31	T	28	34	LFGTGVL	1004
32	G	29	35	FGTGVLA	0.994
33	V	30	36	GTGVLAA	0.966
34	L	31	37	TGVLAAL	0.94
35	A	32	38	GVLAALK	0.93
36	A	33	39	VLAALKF	0.934
37	L	34	40	LAALKFD	0.959
38	K	35	41	AALKFDR	0.986
39	F	36	42	ALKFDRA	1004
40	D	37	43	LKFDRAG	1027
41	R	38	44	KFDRAGN	1032
42	A	39	45	FDRAGNI	1031
43	G	40	46	DRAGNIG	1024
44	N	41	47	RAGNIGY	1003
45	I	42	48	AGNIGYA	0.979
46	G	43	49	GNIGYAA	0.955
47	Y	44	50	NIGYAAG	0.937
48	A	45	51	IGYAAGF	0.925
49	A	46	52	GYAAGFW	0.922
50	G	47	53	YAAGFWG	0.921
51	F	48	54	AAGFWGW	0.92
52	W	49	55	AGFWGWG	0.921
53	G	50	56	GFWGWGL	0.923
54	W	51	57	FWGWGLA	0.925
55	G	52	58	WGWGLAL	0.929
56	L	53	59	GWGLALG	0.932
57	A	54	60	WGLALGM	0.931
58	L	55	61	GLALGMG	0.934
59	G	56	62	LALGMGV	0.933
60	M	57	63	ALGMGVL	0.932
61	G	58	64	LGMGVLV	0.931
62	V	59	65	GMGVLVS	0.935
63	L	60	66	MGVLVSG	0.955
64	V	61	67	GVLVSGG	0.982
65	S	62	68	VLVSGGA	1018
66	G	63	69	LVSGGAS	1046
67	G	64	70	VSGGASG	1055
68	A	65	71	SGGASGA	1.05
69	S	66	72	GGASGAH	1028
70	G	67	73	GASGAHL	1001
71	A	68	74	ASGAHLN	0.979
72	H	69	75	SGAHLNP	0.969
73	L	70	76	GAHLNPS	0.977
74	N	71	77	AHLNPSI	0.994
75	P	72	78	HLNPSIT	1008
76	S	73	79	LNPSITV	1008
77	I	74	80	NPSITVA	0.988
78	T	75	81	PSITVAL	0.961
79	V	76	82	SITVALA	0.939
80	A	77	83	ITVALAT	0.925
81	L	78	84	TVALATI	0.929
82	A	79	85	VALATIG	0.944
83	T	80	86	ALATIGK	0.968
84	I	81	87	LATIGKC	0.992
85	G	82	88	ATIGKCQ	1002
86	K	83	89	TIGKCQW	0.998
87	C	84	90	IGKCQWR	0.982
88	Q	85	91	GKCQWRK	0.971
89	W	86	92	KCQWRKV	0.974
90	R	87	93	CQWRKVP	0.985
91	K	88	94	QWRKVPH	0.994
92	V	89	95	WRKVPHY	0.981
93	P	90	96	RKVPHYL	0.957
94	H	91	97	KVPHYLV	0.932
95	Y	92	98	VPHYLVA	0.912
96	L	93	99	PHYLVAQ	0.909
97	V	94	100	HYLVAQY	0.911
98	A	95	101	YLVAQYL	0.917
99	Q	96	102	LVAQYLG	0.922
100	Y	97	103	VAQYLGA	0.928
101	L	98	104	AQYLGAF	0.933
102	G	99	105	QYLGAFL	0.934
103	A	100	106	YLGAFLG	0.937
104	F	101	107	LGAFLGA	0.936
105	L	102	108	GAFLGAA	0.935
106	G	103	109	AFLGAAV	0.93
107	A	104	110	FLGAAVL	0.926
108	A	105	111	LGAAVLF	0.919
109	V	106	112	GAAVLFL	0.918
110	L	107	113	AAVLFLT	0.922
111	F	108	114	AVLFLTY	0.928
112	L	109	115	VLFLTYK	0.947
113	T	110	116	LFLTYKG	0.966
114	Y	111	117	FLTYKGA	0.985
115	K	112	118	LTYKGAF	0.998
116	G	113	119	TYKGAFD	1001
117	A	114	120	YKGAFDN	0.997
118	F	115	121	KGAFDNY	0.993
119	D	116	122	GAFDNYD	1003
120	N	117	123	AFDNYDG	1016
121	Y	118	124	FDNYDGG	1034
122	D	119	125	DNYDGGF	1049
123	G	120	126	NYDGGFR	1041
124	G	121	127	YDGGFRA	1023
125	F	122	128	DGGFRAT	1003
126	R	123	129	GGFRATT	0.995
127	A	124	130	GFRATTG	1007
128	T	125	131	FRATTGV	1022
129	T	126	132	RATTGVN	1033
130	G	127	133	ATTGVNG	1039
131	V	128	134	TTGVNGT	1038
132	N	129	135	TGVNGTA	1043
133	G	130	136	GVNGTAD	1047
134	T	131	137	VNGTADV	1034
135	A	132	138	NGTADVF	1011
136	D	133	139	GTADVFA	0.978
137	V	134	140	TADVFAS	0.95
138	F	135	141	ADVFASY	0.937
139	A	136	142	DVFASYP	0.943
140	S	137	143	VFASYPR	0.961
141	Y	138	144	FASYPRD	0.99
142	P	139	145	ASYPRDF	1014
143	R	140	146	SYPRDFV	1017
144	D	141	147	YPRDFVG	1015
145	F	142	148	PRDFVGT	1001
146	V	143	149	RDFVGTG	1005
147	G	144	150	DFVGTGN	1023
148	T	145	151	FVGTGNC	1031
149	G	146	152	VGTGNCF	1.03
150	N	147	153	GTGNCFL	1004
151	C	148	154	TGNCFLD	0.978
152	F	149	155	GNCFLDQ	0.971
153	L	150	156	NCFLDQV	0.975
154	D	151	157	CFLDQVV	0.988
155	Q	152	158	FLDQVVG	0.993
156	V	153	159	LDQVVGT	0.992
157	V	154	160	DQVVGTG	0.997
158	G	155	161	QVVGTGL	1006
159	T	156	162	VVGTGLF	1.01
160	G	157	163	VGTGLFV	1001
161	L	158	164	GTGLFVM	0.971
162	F	159	165	TGLFVMC	0.935
163	V	160	166	GLFVMCI	0.906
164	M	161	167	LFVMCIV	0.886
165	C	162	168	FVMCIVA	0.887
166	I	163	169	VMCIVAI	0.887
167	V	164	170	MCIVAIT	0.902
168	A	165	171	CIVAITD	0.924
169	I	166	172	IVAITDN	0.948
170	T	167	173	VAITDNH	0.979
171	D	168	174	AITDNHN	0.992
172	N	169	175	ITDNHNM	0.987
173	H	170	176	TDNHNMA	0.967
174	N	171	177	DNHNMAV	0.938
175	M	172	178	NHNMAVP	0.926
176	A	173	179	HNMAVPQ	0.945
177	V	174	180	NMAVPQG	0.979
178	P	175	181	MAVPQGL	1.02
179	Q	176	182	AVPQGLQ	1047
180	G	177	183	VPQGLQP	1.05
181	L	178	184	PQGLQPL	1039
182	Q	179	185	QGLQPLL	1022
183	P	180	186	GLQPLLI	1001
184	L	181	187	LQPLLIG	0.975
185	L	182	188	QPLLIGL	0.953
186	I	183	189	PLLIGLS	0.935
187	G	184	190	LLIGLSL	0.93
188	L	185	191	LIGLSLA	0.936
189	S	186	192	IGLSLAT	0.947
190	L	187	193	GLSLATT	0.966
191	A	188	194	LSLATTA	0.98
192	T	189	195	SLATTAL	0.991
193	T	190	196	LATTALC	0.988
194	A	191	197	ATTALCF	0.969
195	L	192	198	TTALCFG	0.95
196	C	193	199	TALCFGY	0.934
197	F	194	200	ALCFGYN	0.927
198	G	195	201	LCFGYNC	0.931
199	Y	196	202	CFGYNCG	0.937
200	N	197	203	FGYNCGA	0.946
201	C	198	204	GYNCGAP	0.954
202	G	199	205	YNCGAPL	0.959
203	A	200	206	NCGAPLN	0.97
204	P	201	207	CGAPLNP	0.978
205	L	202	208	GAPLNPA	0.994
206	N	203	209	APLNPAR	1012
207	P	204	210	PLNPARD	1031
208	A	205	211	LNPARDL	1039
209	R	206	212	NPARDLG	1041
210	D	207	213	PARDLGP	1.04
211	L	208	214	ARDLGPR	1031
212	G	209	215	RDLGPRI	1024
213	P	210	216	DLGPRIF	1009
214	R	211	217	LGPRIFT	0.985
215	I	212	218	GPRIFTA	0.96
216	F	213	219	PRIFTAM	0.933
217	T	214	220	RIFTAMA	0.917
218	A	215	221	IFTAMAG	0.908
219	M	216	222	FTAMAGW	0.903
220	A	217	223	TAMAGWG	0.918
221	G	218	224	AMAGWGT	0.939
222	W	219	225	MAGWGTE	0.967
223	G	220	226	AGWGTEV	0.997
224	T	221	227	GWGTEVF	1004
225	E	222	228	WGTEVFS	0.994
226	V	223	229	GTEVFSF	0.97
227	F	224	230	TEVFSFR	0.952
228	S	225	231	EVFSFRD	0.953
229	F	226	232	VFSFRDY	0.966
230	R	227	233	FSFRDYN	0.986
231	D	228	234	SFRDYNW	0.993
232	Y	229	235	FRDYNWF	0.977
233	N	230	236	RDYNWFW	0.949
234	W	231	237	DYNWFWV	0.922
235	F	232	238	YNWFWVP	0.901
236	W	233	239	NWFWVPV	0.893
237	V	234	240	WFWVPVV	0.902
238	P	235	241	FWVPVVA	0.911
239	V	236	242	WVPVVAP	0.92
240	V	237	243	VPVVAPH	0.93
241	A	238	244	PVVAPHI	0.931
242	P	239	245	VVAPHIG	0.93
243	H	240	246	VAPHIGA	0.93
244	I	241	247	APHIGAI	0.923
245	G	242	248	PHIGAIV	0.92
246	A	243	249	HIGAIVG	0.918
247	I	244	250	IGAIVGA	0.915
248	V	245	251	GAIVGAW	0.913
249	G	246	252	AIVGAWL	0.908
250	A	247	253	IVGAWLY	0.904
251	W	248	254	VGAWLYR	0.897
252	L	249	255	GAWLYRL	0.904
253	Y	250	256	AWLYRLL	0.911
254	R	251	257	WLYRLLV	0.918
255	L	252	258	LYRLLVG	0.929
256	L	253	259	YRLLVGL	0.93
257	V	254	260	RLLVGLH	0.93
258	G	255	261	LLVGLHW	0.929
259	L	256	262	LVGLHWP	0.937
260	H	257	263	VGLHWPQ	0.957
261	W	258	264	GLHWPQD	0.988
262	P	259	265	LHWPQDS	1028
263	Q	260	266	HWPQDSY	1.05
264	D	261	267	WPQDSYD	1044
265	S	262	268	PQDSYDM	1025
266	Y	263	269	QDSYDME	0.997
267	D	264	270	DSYDMEQ	0.989
268	M	265	271	SYDMEQR	1002
269	E	266	272	YDMEQRN	1031
270	Q	267	273	DMEQRNR	1061
271	R	268	274	MEQRNRA	1.07
272	N	269	275	EQRNRAK	1075
273	R	270	276	QRNRAKD	1064
274	A	271	277	RNRAKDG	1061
275	K	272	278	NRAKDGG	1066
276	D	273	279	RAKDGGY	1.06
277	G	274	280	AKDGGYS	1053
278	G	275	281	KDGGYSL	1027

## Sheet: Parker (hidroph.)
Position	Residue	Start	End	Peptide	Score
4	D	1	7	MILDKVK	-0.529
5	K	2	8	ILDKVKI	-1071
6	V	3	9	LDKVKIK	0.886
7	K	4	10	DKVKIKS	3129
8	I	5	11	KVKIKSL	0.386
9	K	6	12	VKIKSLA	-0.129
10	S	7	13	KIKSLAL	-0.914
11	L	8	14	IKSLALR	-1129
12	A	9	15	KSLALRE	1129
13	L	10	16	SLALRET	1057
14	R	11	17	LALRETF	-1186
15	E	12	18	ALRETFA	0.429
16	T	13	19	LRETFAE	1243
17	F	14	20	RETFAEL	1243
18	A	15	21	ETFAELL	-0.671
19	E	16	22	TFAELLG	-0.971
20	L	17	23	FAELLGT	-0.971
21	L	18	24	AELLGTF	-0.971
22	G	19	25	ELLGTFV	-1.8
23	T	20	26	LLGTFVL	-4229
24	F	21	27	LGTFVLV	-3443
25	V	22	28	GTFVLVL	-3443
26	L	23	29	TFVLVLF	-5571
27	V	24	30	FVLVLFG	-5.5
28	L	25	31	VLVLFGT	-3443
29	F	26	32	LVLFGTG	-2.1
30	G	27	33	VLFGTGV	-1314
31	T	28	34	LFGTGVL	-2.1
32	G	29	35	FGTGVLA	-0.486
33	V	30	36	GTGVLAA	1129
34	L	31	37	TGVLAAL	-1.0
35	A	32	38	GVLAALK	-0.929
36	A	33	39	VLAALKF	-3057
37	L	34	40	LAALKFD	-1.1
38	K	35	41	AALKFDR	0.814
39	F	36	42	ALKFDRA	0.814
40	D	37	43	LKFDRAG	1329
41	R	38	44	KFDRAGN	3643
42	A	39	45	FDRAGNI	1686
43	G	40	46	DRAGNIG	3814
44	N	41	47	RAGNIGY	2114
45	I	42	48	AGNIGYA	1814
46	G	43	49	GNIGYAA	1814
47	Y	44	50	NIGYAAG	1814
48	A	45	51	IGYAAGF	-0.5
49	A	46	52	GYAAGFW	-0.786
50	G	47	53	YAAGFWG	-0.786
51	F	48	54	AAGFWGW	-1943
52	W	49	55	AGFWGWG	-1429
53	G	50	56	GFWGWGL	-3043
54	W	51	57	FWGWGLA	-3557
55	G	52	58	WGWGLAL	-3557
56	L	53	59	GWGLALG	-1314
57	A	54	60	WGLALGM	-2729
58	L	55	61	GLALGMG	-0.486
59	G	56	62	LALGMGV	-1829
60	M	57	63	ALGMGVL	-1829
61	G	58	64	LGMGVLV	-2657
62	V	59	65	GMGVLVS	-0.414
63	L	60	66	MGVLVSG	-0.414
64	V	61	67	GVLVSGG	1.0
65	S	62	68	VLVSGGA	0.486
66	G	63	69	LVSGGAS	1943
67	G	64	70	VSGGASG	4071
68	A	65	71	SGGASGA	4.9
69	S	66	72	GGASGAH	4271
70	G	67	73	GASGAHL	2143
71	A	68	74	ASGAHLN	2329
72	H	69	75	SGAHLNP	2329
73	L	70	76	GAHLNPS	2329
74	N	71	77	AHLNPSI	0.371
75	P	72	78	HLNPSIT	0.814
76	S	73	79	LNPSITV	-0.014
77	I	74	80	NPSITVA	1.6
78	T	75	81	PSITVAL	-0.714
79	V	76	82	SITVALA	-0.714
80	A	77	83	ITVALAT	-0.9
81	L	78	84	TVALATI	-0.9
82	A	79	85	VALATIG	-0.829
83	T	80	86	ALATIGK	0.514
84	I	81	87	LATIGKC	0.414
85	G	82	88	ATIGKCQ	2586
86	K	83	89	TIGKCQW	0.857
87	C	84	90	IGKCQWR	0.714
88	Q	85	91	GKCQWRK	2671
89	W	86	92	KCQWRKV	1329
90	R	87	93	CQWRKVP	0.814
91	K	88	94	QWRKVPH	0.914
92	V	89	95	WRKVPHY	-0.214
93	P	90	96	RKVPHYL	-0.1
94	H	91	97	KVPHYLV	-1229
95	Y	92	98	VPHYLVA	-1743
96	L	93	99	PHYLVAQ	-0.357
97	V	94	100	HYLVAQY	-0.929
98	A	95	101	YLVAQYL	-2543
99	Q	96	102	LVAQYLG	-1457
100	Y	97	103	VAQYLGA	0.157
101	L	98	104	AQYLGAF	-0.629
102	G	99	105	QYLGAFL	-2243
103	A	100	106	YLGAFLG	-2286
104	F	101	107	LGAFLGA	-1714
105	L	102	108	GAFLGAA	-0.1
106	G	103	109	AFLGAAV	-1443
107	A	104	110	FLGAAVL	-3057
108	A	105	111	LGAAVLF	-3057
109	V	106	112	GAAVLFL	-3057
110	L	107	113	AAVLFLT	-3129
111	F	108	114	AVLFLTY	-3.7
112	L	109	115	VLFLTYK	-3186
113	T	110	116	LFLTYKG	-1843
114	Y	111	117	FLTYKGA	-0.229
115	K	112	118	LTYKGAF	-0.229
116	G	113	119	TYKGAFD	2514
117	A	114	120	YKGAFDN	2771
118	F	115	121	KGAFDNY	2771
119	D	116	122	GAFDNYD	3386
120	N	117	123	AFDNYDG	3386
121	Y	118	124	FDNYDGG	3.9
122	D	119	125	DNYDGGF	3.9
123	G	120	126	NYDGGFR	3071
124	G	121	127	YDGGFRA	2371
125	F	122	128	DGGFRAT	3386
126	R	123	129	GGFRATT	2.7
127	A	124	130	GFRATTG	2.7
128	T	125	131	FRATTGV	1357
129	T	126	132	RATTGVN	3671
130	G	127	133	ATTGVNG	3886
131	V	128	134	TTGVNGT	4329
132	N	129	135	TGVNGTA	3886
133	G	130	136	GVNGTAD	4571
134	T	131	137	VNGTADV	3229
135	A	132	138	NGTADVF	2443
136	D	133	139	GTADVFA	1743
137	V	134	140	TADVFAS	1857
138	F	135	141	ADVFASY	0.843
139	A	136	142	DVFASYP	0.843
140	S	137	143	VFASYPR	0.014
141	Y	138	144	FASYPRD	1971
142	P	139	145	ASYPRDF	1971
143	R	140	146	SYPRDFV	1143
144	D	141	147	YPRDFVG	1029
145	F	142	148	PRDFVGT	2043
146	V	143	149	RDFVGTG	2557
147	G	144	150	DFVGTGN	2957
148	T	145	151	FVGTGNC	1729
149	G	146	152	VGTGNCF	1729
150	N	147	153	GTGNCFL	0.943
151	C	148	154	TGNCFLD	1557
152	F	149	155	GNCFLDQ	1671
153	L	150	156	NCFLDQV	0.329
154	D	151	157	CFLDQVV	-1.2
155	Q	152	158	FLDQVVG	-0.586
156	V	153	159	LDQVVGT	1471
157	V	154	160	DQVVGTG	3.6
158	G	155	161	QVVGTGL	0.857
159	T	156	162	VVGTGLF	-1314
160	G	157	163	VGTGLFV	-1314
161	L	158	164	GTGLFVM	-1386
162	F	159	165	TGLFVMC	-2.0
163	V	160	166	GLFVMCI	-3886
164	M	161	167	LFVMCIV	-5229
165	C	162	168	FVMCIVA	-3614
166	I	163	169	VMCIVAI	-3443
167	V	164	170	MCIVAIT	-2171
168	A	165	171	CIVAITD	-0.143
169	I	166	172	IVAITDN	0.657
170	T	167	173	VAITDNH	2.1
171	D	168	174	AITDNHN	3629
172	N	169	175	ITDNHNM	2729
173	H	170	176	TDNHNMA	4171
174	N	171	177	DNHNMAV	2.9
175	M	172	178	NHNMAVP	1771
176	A	173	179	HNMAVPQ	1629
177	V	174	180	NMAVPQG	2143
178	P	175	181	MAVPQGL	-0.171
179	Q	176	182	AVPQGLQ	1286
180	G	177	183	VPQGLQP	1286
181	L	178	184	PQGLQPL	0.5
182	Q	179	185	QGLQPLL	-1114
183	P	180	186	GLQPLLI	-3114
184	L	181	187	LQPLLIG	-3114
185	L	182	188	QPLLIGL	-3114
186	I	183	189	PLLIGLS	-3043
187	G	184	190	LLIGLSL	-4657
188	L	185	191	LIGLSLA	-3043
189	S	186	192	IGLSLAT	-0.986
190	L	187	193	GLSLATT	0.9
191	A	188	194	LSLATTA	0.386
192	T	189	195	SLATTAL	0.386
193	T	190	196	LATTALC	-0.343
194	A	191	197	ATTALCF	-0.343
195	L	192	198	TTALCFG	0.171
196	C	193	199	TALCFGY	-0.843
197	F	194	200	ALCFGYN	-0.586
198	G	195	201	LCFGYNC	-0.686
199	Y	196	202	CFGYNCG	1443
200	N	197	203	FGYNCGA	1543
201	C	198	204	GYNCGAP	3157
202	G	199	205	YNCGAPL	1029
203	A	200	206	NCGAPLN	2.3
204	P	201	207	CGAPLNP	1.6
205	L	202	208	GAPLNPA	1.7
206	N	203	209	APLNPAR	1486
207	P	204	210	PLNPARD	2614
208	A	205	211	LNPARDL	1.0
209	R	206	212	NPARDLG	3129
210	D	207	213	PARDLGP	2429
211	L	208	214	ARDLGPR	2729
212	G	209	215	RDLGPRI	1286
213	P	210	216	DLGPRIF	-0.629
214	R	211	217	LGPRIFT	-1314
215	I	212	218	GPRIFTA	0.3
216	F	213	219	PRIFTAM	-1114
217	T	214	220	RIFTAMA	-1114
218	A	215	221	IFTAMAG	-0.9
219	M	216	222	FTAMAGW	-1186
220	A	217	223	TAMAGWG	0.943
221	G	218	224	AMAGWGT	0.943
222	W	219	225	MAGWGTE	1757
223	G	220	226	AGWGTEV	1829
224	T	221	227	GWGTEVF	0.214
225	E	222	228	WGTEVFS	0.329
226	V	223	229	GTEVFSF	0.443
227	F	224	230	TEVFSFR	0.229
228	S	225	231	EVFSFRD	0.914
229	F	226	232	VFSFRDY	-0.471
230	R	227	233	FSFRDYN	1057
231	D	228	234	SFRDYNW	0.943
232	Y	229	235	FRDYNWF	-1.3
233	N	230	236	RDYNWFW	-1414
234	W	231	237	DYNWFWV	-2543
235	F	232	238	YNWFWVP	-3671
236	W	233	239	NWFWVPV	-3929
237	V	234	240	WFWVPVV	-5457
238	P	235	241	FWVPVVA	-3729
239	V	236	242	WVPVVAP	-2114
240	V	237	243	VPVVAPH	-0.386
241	A	238	244	PVVAPHI	-1.0
242	P	239	245	VVAPHIG	-0.486
243	H	240	246	VAPHIGA	0.343
244	I	241	247	APHIGAI	-0.271
245	G	242	248	PHIGAIV	-1.1
246	A	243	249	HIGAIVG	-0.586
247	I	244	250	IGAIVGA	-0.586
248	V	245	251	GAIVGAW	-0.871
249	G	246	252	AIVGAWL	-3.0
250	A	247	253	IVGAWLY	-3571
251	W	248	254	VGAWLYR	-1829
252	L	249	255	GAWLYRL	-2614
253	Y	250	256	AWLYRLL	-4743
254	R	251	257	WLYRLLV	-5571
255	L	252	258	LYRLLVG	-3329
256	L	253	259	YRLLVGL	-3329
257	V	254	260	RLLVGLH	-2757
258	G	255	261	LLVGLHW	-4786
259	L	256	262	LVGLHWP	-3171
260	H	257	263	VGLHWPQ	-1.0
261	W	258	264	GLHWPQD	0.957
262	P	259	265	LHWPQDS	1071
263	Q	260	266	HWPQDSY	2114
264	D	261	267	WPQDSYD	3243
265	S	262	268	PQDSYDM	4071
266	Y	263	269	QDSYDME	4886
267	D	264	270	DSYDMEQ	4886
268	M	265	271	SYDMEQR	4057
269	E	266	272	YDMEQRN	4129
270	Q	267	273	DMEQRNR	5.0
271	R	268	274	MEQRNRA	3871
272	N	269	275	EQRNRAK	5286
273	R	270	276	QRNRAKD	5.6
274	A	271	277	RNRAKDG	5557
275	K	272	278	NRAKDGG	5771
276	D	273	279	RAKDGGY	4.5
277	G	274	280	AKDGGYS	4829
278	G	275	281	KDGGYSL	3214
279	Y	276	282	DGGYSLE	3514

## Sheet: Kolaskar (antig.)
Position	Residue	Start	End	Peptide	Score
4	D	1	7	MILDKVK	1048
5	K	2	8	ILDKVKI	1095
6	V	3	9	LDKVKIK	1063
7	K	4	10	DKVKIKS	1029
8	I	5	11	KVKIKSL	1084
9	K	6	12	VKIKSLA	1103
10	S	7	13	KIKSLAL	1084
11	L	8	14	IKSLALR	1076
12	A	9	15	KSLALRE	1033
13	L	10	16	SLALRET	1.03
14	R	11	17	LALRETF	1041
15	E	12	18	ALRETFA	1015
16	T	13	19	LRETFAE	0.984
17	F	14	20	RETFAEL	0.984
18	A	15	21	ETFAELL	1038
19	E	16	22	TFAELLG	1041
20	L	17	23	FAELLGT	1041
21	L	18	24	AELLGTF	1041
22	G	19	25	ELLGTFV	1087
23	T	20	26	LLGTFVL	1144
24	F	21	27	LGTFVLV	1163
25	V	22	28	GTFVLVL	1163
26	L	23	29	TFVLVLF	1194
27	V	24	30	FVLVLFG	1189
28	L	25	31	VLVLFGT	1163
29	F	26	32	LVLFGTG	1.09
30	G	27	33	VLFGTGV	1109
31	T	28	34	LFGTGVL	1.09
32	G	29	35	FGTGVLA	1064
33	V	30	36	GTGVLAA	1.06
34	L	31	37	TGVLAAL	1113
35	A	32	38	GVLAALK	1116
36	A	33	39	VLAALKF	1147
37	L	34	40	LAALKFD	1074
38	K	35	41	AALKFDR	1.02
39	F	36	42	ALKFDRA	1.02
40	D	37	43	LKFDRAG	0.993
41	R	38	44	KFDRAGN	0.925
42	A	39	45	FDRAGNI	0.957
43	G	40	46	DRAGNIG	0.926
44	N	41	47	RAGNIGY	0.968
45	I	42	48	AGNIGYA	0.995
46	G	43	49	GNIGYAA	0.995
47	Y	44	50	NIGYAAG	0.995
48	A	45	51	IGYAAGF	1.04
49	A	46	52	GYAAGFW	1003
50	G	47	53	YAAGFWG	1003
51	F	48	54	AAGFWGW	0.965
52	W	49	55	AGFWGWG	0.938
53	G	50	56	GFWGWGL	0.964
54	W	51	57	FWGWGLA	0.991
55	G	52	58	WGWGLAL	1014
56	L	53	59	GWGLALG	1011
57	A	54	60	WGLALGM	1004
58	L	55	61	GLALGMG	1002
59	G	56	62	LALGMGV	1074
60	M	57	63	ALGMGVL	1074
61	G	58	64	LGMGVLV	1.12
62	V	59	65	GMGVLVS	1086
63	L	60	66	MGVLVSG	1086
64	V	61	67	GVLVSGG	1093
65	S	62	68	VLVSGGA	1.12
66	G	63	69	LVSGGAS	1067
67	G	64	70	VSGGASG	1013
68	A	65	71	SGGASGA	0.968
69	S	66	72	GGASGAH	0.981
70	G	67	73	GASGAHL	1035
71	A	68	74	ASGAHLN	1021
72	H	69	75	SGAHLNP	1021
73	L	70	76	GAHLNPS	1021
74	N	71	77	AHLNPSI	1.06
75	P	72	78	HLNPSIT	1038
76	S	73	79	LNPSITV	1078
77	I	74	80	NPSITVA	1051
78	T	75	81	PSITVAL	1119
79	V	76	82	SITVALA	1119
80	A	77	83	ITVALAT	1104
81	L	78	84	TVALATI	1104
82	A	79	85	VALATIG	1099
83	T	80	86	ALATIGK	1035
84	I	81	87	LATIGKC	1084
85	G	82	88	ATIGKCQ	1051
86	K	83	89	TIGKCQW	1026
87	C	84	90	IGKCQWR	1021
88	Q	85	91	GKCQWRK	0.99
89	W	86	92	KCQWRKV	1062
90	R	87	93	CQWRKVP	1081
91	K	88	94	QWRKVPH	1038
92	V	89	95	WRKVPHY	1058
93	P	90	96	RKVPHYL	1109
94	H	91	97	KVPHYLV	1182
95	Y	92	98	VPHYLVA	1201
96	L	93	99	PHYLVAQ	1149
97	V	94	100	HYLVAQY	1163
98	A	95	101	YLVAQYL	1183
99	Q	96	102	LVAQYLG	1142
100	Y	97	103	VAQYLGA	1116
101	L	98	104	AQYLGAF	1074
102	G	99	105	QYLGAFL	1101
103	A	100	106	YLGAFLG	1081
104	F	101	107	LGAFLGA	1067
105	L	102	108	GAFLGAA	1.04
106	G	103	109	AFLGAAV	1113
107	A	104	110	FLGAAVL	1139
108	A	105	111	LGAAVLF	1139
109	V	106	112	GAAVLFL	1139
110	L	107	113	AAVLFLT	1144
111	F	108	114	AVLFLTY	1158
112	L	109	115	VLFLTYK	1139
113	T	110	116	LFLTYKG	1066
114	Y	111	117	FLTYKGA	1.04
115	K	112	118	LTYKGAF	1.04
116	G	113	119	TYKGAFD	0.985
117	A	114	120	YKGAFDN	0.966
118	F	115	121	KGAFDNY	0.966
119	D	116	122	GAFDNYD	0.957
120	N	117	123	AFDNYDG	0.957
121	Y	118	124	FDNYDGG	0.93
122	D	119	125	DNYDGGF	0.93
123	G	120	126	NYDGGFR	0.931
124	G	121	127	YDGGFRA	0.972
125	F	122	128	DGGFRAT	0.936
126	R	123	129	GGFRATT	0.942
127	A	124	130	GFRATTG	0.942
128	T	125	131	FRATTGV	1015
129	T	126	132	RATTGVN	0.97
130	G	127	133	ATTGVNG	0.97
131	V	128	134	TTGVNGT	0.948
132	N	129	135	TGVNGTA	0.97
133	G	130	136	GVNGTAD	0.964
134	T	131	137	VNGTADV	1036
135	A	132	138	NGTADVF	0.995
136	D	133	139	GTADVFA	1036
137	V	134	140	TADVFAS	1056
138	F	135	141	ADVFASY	1092
139	A	136	142	DVFASYP	1092
140	S	137	143	VFASYPR	1093
141	Y	138	144	FASYPRD	1019
142	P	139	145	ASYPRDF	1019
143	R	140	146	SYPRDFV	1064
144	D	141	147	YPRDFVG	1045
145	F	142	148	PRDFVGT	1009
146	V	143	149	RDFVGTG	0.981
147	G	144	150	DFVGTGN	0.968
148	T	145	151	FVGTGNC	1046
149	G	146	152	VGTGNCF	1046
150	N	147	153	GTGNCFL	1027
151	C	148	154	TGNCFLD	1025
152	F	149	155	GNCFLDQ	1041
153	L	150	156	NCFLDQV	1113
154	D	151	157	CFLDQVV	1.2
155	Q	152	158	FLDQVVG	1123
156	V	153	159	LDQVVGT	1097
157	V	154	160	DQVVGTG	1043
158	G	155	161	QVVGTGL	1098
159	T	156	162	VVGTGLF	1109
160	G	157	163	VGTGLFV	1109
161	L	158	164	GTGLFVM	1.03
162	F	159	165	TGLFVMC	1106
163	V	160	166	GLFVMCI	1141
164	M	161	167	LFVMCIV	1214
165	C	162	168	FVMCIVA	1187
166	I	163	169	VMCIVAI	1196
167	V	164	170	MCIVAIT	1128
168	A	165	171	CIVAITD	1134
169	I	166	172	IVAITDN	1043
170	T	167	173	VAITDNH	1036
171	D	168	174	AITDNHN	0.95
172	N	169	175	ITDNHNM	0.916
173	H	170	176	TDNHNMA	0.903
174	N	171	177	DNHNMAV	0.971
175	M	172	178	NHNMAVP	0.999
176	A	173	179	HNMAVPQ	1033
177	V	174	180	NMAVPQG	1.0
178	P	175	181	MAVPQGL	1068
179	Q	176	182	AVPQGLQ	1095
180	G	177	183	VPQGLQP	1095
181	L	178	184	PQGLQPL	1076
182	Q	179	185	QGLQPLL	1103
183	P	180	186	GLQPLLI	1122
184	L	181	187	LQPLLIG	1122
185	L	182	188	QPLLIGL	1122
186	I	183	189	PLLIGLS	1122
187	G	184	190	LLIGLSL	1148
188	L	185	191	LIGLSLA	1122
189	S	186	192	IGLSLAT	1073
190	L	187	193	GLSLATT	1038
191	A	188	194	LSLATTA	1065
192	T	189	195	SLATTAL	1065
193	T	190	196	LATTALC	1123
194	A	191	197	ATTALCF	1.1
195	L	192	198	TTALCFG	1073
196	C	193	199	TALCFGY	1109
197	F	194	200	ALCFGYN	1.09
198	G	195	201	LCFGYNC	1139
199	Y	196	202	CFGYNCG	1086
200	N	197	203	FGYNCGA	1036
201	C	198	204	GYNCGAP	1032
202	G	199	205	YNCGAPL	1086
203	A	200	206	NCGAPLN	1031
204	P	201	207	CGAPLNP	1072
205	L	202	208	GAPLNPA	1022
206	N	203	209	APLNPAR	1022
207	P	204	210	PLNPARD	0.994
208	A	205	211	LNPARDL	1.02
209	R	206	212	NPARDLG	0.967
210	D	207	213	PARDLGP	1008
211	L	208	214	ARDLGPR	0.981
212	G	209	215	RDLGPRI	0.993
213	P	210	216	DLGPRIF	1024
214	R	211	217	LGPRIFT	1.03
215	I	212	218	GPRIFTA	1004
216	F	213	219	PRIFTAM	0.997
217	T	214	220	RIFTAMA	0.997
218	A	215	221	IFTAMAG	0.997
219	M	216	222	FTAMAGW	0.96
220	A	217	223	TAMAGWG	0.929
221	G	218	224	AMAGWGT	0.929
222	W	219	225	MAGWGTE	0.899
223	G	220	226	AGWGTEV	0.978
224	T	221	227	GWGTEVF	0.982
225	E	222	228	WGTEVFS	1002
226	V	223	229	GTEVFSF	1.03
227	F	224	230	TEVFSFR	1.03
228	S	225	231	EVFSFRD	1024
229	F	226	232	VFSFRDY	1068
230	R	227	233	FSFRDYN	0.981
231	D	228	234	SFRDYNW	0.953
232	Y	229	235	FRDYNWF	0.964
233	N	230	236	RDYNWFW	0.936
234	W	231	237	DYNWFWV	1009
235	F	232	238	YNWFWVP	1037
236	W	233	239	NWFWVPV	1069
237	V	234	240	WFWVPVV	1156
238	P	235	241	FWVPVVA	1.18
239	V	236	242	WVPVVAP	1176
240	V	237	243	VPVVAPH	1207
241	A	238	244	PVVAPHI	1174
242	P	239	245	VVAPHIG	1146
243	H	240	246	VAPHIGA	1101
244	I	241	247	APHIGAI	1068
245	G	242	248	PHIGAIV	1113
246	A	243	249	HIGAIVG	1086
247	I	244	250	IGAIVGA	1.08
248	V	245	251	GAIVGAW	1043
249	G	246	252	AIVGAWL	1097
250	A	247	253	IVGAWLY	1111
251	W	248	254	VGAWLYR	1071
252	L	249	255	GAWLYRL	1052
253	Y	250	256	AWLYRLL	1106
254	R	251	257	WLYRLLV	1151
255	L	252	258	LYRLLVG	1149
256	L	253	259	YRLLVGL	1149
257	V	254	260	RLLVGLH	1141
258	G	255	261	LLVGLHW	1144
259	L	256	262	LVGLHWP	1117
260	H	257	263	VGLHWPQ	1083
261	W	258	264	GLHWPQD	1.01
262	P	259	265	LHWPQDS	1029
263	Q	260	266	HWPQDSY	1017
264	D	261	267	WPQDSYD	0.982
265	S	262	268	PQDSYDM	0.973
266	Y	263	269	QDSYDME	0.942
267	D	264	270	DSYDMEQ	0.942
268	M	265	271	SYDMEQR	0.943
269	E	266	272	YDMEQRN	0.91
270	Q	267	273	DMEQRNR	0.869
271	R	268	274	MEQRNRA	0.897
272	N	269	275	EQRNRAK	0.912
273	R	270	276	QRNRAKD	0.914
274	A	271	277	RNRAKDG	0.894
275	K	272	278	NRAKDGG	0.894
276	D	273	279	RAKDGGY	0.949
277	G	274	280	AKDGGYS	0.969
278	G	275	281	KDGGYSL	0.995
279	Y	276	282	DGGYSLE	0.984

## Sheet: BepiPred 2.0 Epit
Position	AminoAcid	Score	Assingment
1	M	0.256666666667
2	I	0.322555555556
3	L	0.387222222222
4	D	0.447666666667
5	K	0.510555555556	B
6	V	0.521888888889	B
7	K	0.545666666667	B
8	I	0.548111111111	B
9	K	0.526555555556	B
10	S	0.512666666667	B
11	L	0.494555555556
12	A	0.466
13	L	0.439555555556
14	R	0.407
15	E	0.387555555556
16	T	0.358111111111
17	F	0.346111111111
18	A	0.344444444444
19	E	0.321444444444
20	L	0.305333333333
21	L	0.297444444444
22	G	0.292444444444
23	T	0.285888888889
24	F	0.278444444444
25	V	0.276555555556
26	L	0.263888888889
27	V	0.260333333333
28	L	0.264222222222
29	F	0.256666666667
30	G	0.264333333333
31	T	0.267777777778
32	G	0.279111111111
33	V	0.293888888889
34	L	0.321333333333
35	A	0.353
36	A	0.395333333333
37	L	0.432444444444
38	K	0.479777777778
39	F	0.514111111111	B
40	D	0.547777777778	B
41	R	0.573111111111	B
42	A	0.587333333333	B
43	G	0.583111111111	B
44	N	0.567666666667	B
45	I	0.541222222222	B
46	G	0.513333333333	B
47	Y	0.485222222222
48	A	0.464888888889
49	A	0.435555555556
50	G	0.416
51	F	0.393
52	W	0.383
53	G	0.376888888889
54	W	0.368222222222
55	G	0.351666666667
56	L	0.340555555556
57	A	0.321888888889
58	L	0.320111111111
59	G	0.312777777778
60	M	0.310888888889
61	G	0.301333333333
62	V	0.310555555556
63	L	0.328888888889
64	V	0.354888888889
65	S	0.371444444444
66	G	0.392
67	G	0.404111111111
68	A	0.416222222222
69	S	0.424111111111
70	G	0.427777777778
71	A	0.415444444444
72	H	0.393777777778
73	L	0.366888888889
74	N	0.338666666667
75	P	0.310111111111
76	S	0.282888888889
77	I	0.264555555556
78	T	0.246666666667
79	V	0.247555555556
80	A	0.259111111111
81	L	0.284
82	A	0.321666666667
83	T	0.352222222222
84	I	0.395777777778
85	G	0.430111111111
86	K	0.469888888889
87	C	0.505	B
88	Q	0.506333333333	B
89	W	0.502777777778	B
90	R	0.501555555556	B
91	K	0.479555555556
92	V	0.453333333333
93	P	0.417777777778
94	H	0.389333333333
95	Y	0.359
96	L	0.338333333333
97	V	0.337111111111
98	A	0.325111111111
99	Q	0.296555555556
100	Y	0.291666666667
101	L	0.294888888889
102	G	0.286666666667
103	A	0.285
104	F	0.275888888889
105	L	0.269222222222
106	G	0.253333333333
107	A	0.255888888889
108	A	0.266555555556
109	V	0.265777777778
110	L	0.269
111	F	0.298888888889
112	L	0.321888888889
113	T	0.35
114	Y	0.369111111111
115	K	0.408666666667
116	G	0.440777777778
117	A	0.464222222222
118	F	0.504	B
119	D	0.543	B
120	N	0.554555555556	B
121	Y	0.575777777778	B
122	D	0.600777777778	B
123	G	0.599444444444	B
124	G	0.603	B
125	F	0.612	B
126	R	0.619111111111	B
127	A	0.619111111111	B
128	T	0.631	B
129	T	0.627666666667	B
130	G	0.611111111111	B
131	V	0.584555555556	B
132	N	0.587222222222	B
133	G	0.567666666667	B
134	T	0.527888888889	B
135	A	0.495333333333
136	D	0.452777777778
137	V	0.418
138	F	0.404333333333
139	A	0.407777777778
140	S	0.422555555556
141	Y	0.434444444444
142	P	0.446888888889
143	R	0.462777777778
144	D	0.482444444444
145	F	0.500666666667	B
146	V	0.503111111111	B
147	G	0.499555555556
148	T	0.484222222222
149	G	0.452555555556
150	N	0.426777777778
151	C	0.410888888889
152	F	0.397333333333
153	L	0.381555555556
154	D	0.364222222222
155	Q	0.347
156	V	0.334777777778
157	V	0.333888888889
158	G	0.333333333333
159	T	0.320777777778
160	G	0.301888888889
161	L	0.283222222222
162	F	0.260333333333
163	V	0.244222222222
164	M	0.238222222222
165	C	0.228
166	I	0.215888888889
167	V	0.229
168	A	0.27
169	I	0.317666666667
170	T	0.375666666667
171	D	0.437333333333
172	N	0.496666666667
173	H	0.542444444444	B
174	N	0.586	B
175	M	0.631222222222	B
176	A	0.651	B
177	V	0.643444444444	B
178	P	0.630222222222	B
179	Q	0.610777777778	B
180	G	0.576444444444	B
181	L	0.535666666667	B
182	Q	0.503111111111	B
183	P	0.470222222222
184	L	0.426
185	L	0.399
186	I	0.379888888889
187	G	0.354111111111
188	L	0.330444444444
189	S	0.317111111111
190	L	0.321111111111
191	A	0.316222222222
192	T	0.316444444444
193	T	0.328555555556
194	A	0.317333333333
195	L	0.316555555556
196	C	0.334111111111
197	F	0.342444444444
198	G	0.361
199	Y	0.366333333333
200	N	0.374777777778
201	C	0.387666666667
202	G	0.396111111111
203	A	0.406666666667
204	P	0.395666666667
205	L	0.390222222222
206	N	0.394555555556
207	P	0.380555555556
208	A	0.369111111111
209	R	0.360555555556
210	D	0.355666666667
211	L	0.329333333333
212	G	0.314444444444
213	P	0.309333333333
214	R	0.294666666667
215	I	0.283888888889
216	F	0.289888888889
217	T	0.307666666667
218	A	0.330444444444
219	M	0.349111111111
220	A	0.393333333333
221	G	0.437111111111
222	W	0.476888888889
223	G	0.512333333333	B
224	T	0.547222222222	B
225	E	0.568888888889	B
226	V	0.591555555556	B
227	F	0.597666666667	B
228	S	0.597555555556	B
229	F	0.592111111111	B
230	R	0.577888888889	B
231	D	0.562666666667	B
232	Y	0.550222222222	B
233	N	0.507111111111	B
234	W	0.474666666667
235	F	0.427
236	W	0.388777777778
237	V	0.354888888889
238	P	0.324777777778
239	V	0.309555555556
240	V	0.295
241	A	0.270444444444
242	P	0.273
243	H	0.277555555556
244	I	0.281111111111
245	G	0.285111111111
246	A	0.297888888889
247	I	0.316777777778
248	V	0.319111111111
249	G	0.325333333333
250	A	0.346777777778
251	W	0.364222222222
252	L	0.352555555556
253	Y	0.370666666667
254	R	0.396444444444
255	L	0.427111111111
256	L	0.442
257	V	0.459111111111
258	G	0.485111111111
259	L	0.507444444444	B
260	H	0.523777777778	B
261	W	0.565	B
262	P	0.581	B
263	Q	0.588333333333	B
264	D	0.581333333333	B
265	S	0.584777777778	B
266	Y	0.592	B
267	D	0.593777777778	B
268	M	0.589888888889	B
269	E	0.592	B
270	Q	0.591888888889	B
271	R	0.599666666667	B
272	N	0.602111111111	B
273	R	0.612222222222	B
274	A	0.606	B
275	K	0.599555555556	B
276	D	0.590333333333	B
277	G	0.575555555556	B
278	G	0.569888888889	B
279	Y	0.504333333333	B
280	S	0.433444444444
281	L	0.368333333333
282	E	0.296777777778

[truncated: 10 more sheets: BepiPred 1.0, ABCpred, BcePred,  Ellipro (non-linear B), MHC I Pig, MHC I Pig list, MHC II Human, MHC II Mouse, NetChop, PCPS]
