# Supplementary material for: First Data on Ornithodoros moubata Aquaporins: Structural, Phylogenetic and Immunogenic Characterisation as Vaccine Targets
Source: Pathogens. 2022 Jun 16;11(6):694. doi: 10.3390/pathogens11060694 (PMC9227307; doi:10.3390/pathogens11060694)
Supplement: Supplementary file 1 [file pathogens-11-00694-s001.zip › Table S8.xlsx]

## Sheet: Summary
Table S8: Structural, physicochemical and epitope predictions for OmAQP15
Position	Sequence	TMHMM	Emini (accesibility)	BepiPred 2.0 (surface)	Chou & Fasman (turns)	Karplus & Scoultz (flexibility)	Parker (hydrophilicity)	Kolaskar & Tongaonkar	BepiPred 2.0 (epit)	BepiPred 1.0 (epit)	ABCpred	BcePred	Ellipro	MHC I IEDB Pig	MHC II IEDB Human	MHC II IEDB Mouse	NetChop	PCPS	CEG
1	M	i		E					.	.	.	.	.	.	.	T	.	.
2	I	i		E					.	.	.	.	.	.	.	T	.	.
3	L	i	.	E					.	.	.	.	.	T	.	T	S	S
4	D	i	.	E	.	E	.	B	.	.	.	.	.	T	.	T	.	.
5	K	i	.	E	.	E	.	B	B	.	.	B	.	T	.	T	.	.
6	V	i	E	E	.	E	E	B	B	.	.	B	.	T	.	T	.	S
7	K	i	E	E	E	E	E	.	B	.	.	B	.	T	T	T	.	.
8	I	i	.	.	.	E	.	B	B	.	.	.	.	T	T	T	.	S
9	K	i	.	E	.	E	.	B	B	.	.	.	.	T	T	T	S	S
10	S	i	.	E	.	E	.	B	B	.	.	.	B	T	T	T	.	.
11	L	i	E	E	.	E	.	B	.	.	.	.	B	T	T	T	S	S
12	A	i	.	.	.	E	E	.	.	.	.	B	B	T	T	T	.	.
13	L	i	.	.	.	E	E	.	.	.	.	.	B	T	T	T	S	S
14	R	i	.	.	.	E	.	.	.	.	.	.	B	T	T	T	.	.
15	E	i	.	E	.	E	.	.	.	.	.	.	B	T	T	T	.	.
16	T	i	E	.	.	E	E	.	.	.	.	B	B	T	T	.	.	.
17	F	i	.	.	.	E	E	.	.	.	.	B	B	T	T	.	S	S
18	A	i	.	.	.	.	.	.	.	.	.	.	.	T	T	.	.	.
19	E	i	.	.	.	.	.	.	.	.	.	.	.	T	T	.	.	.
20	L	M	.	.	.	.	.	.	.	.	.	.	.	T	T	.	S	S
21	L	M	.	.	.	E	.	B	.	.	.	.	.	T	T	.	.	S
22	G	M	.	.	.	E	.	B	.	.	.	B	.	T	T	.	.	.
23	T	M	.	.	.	E	.	B	.	.	.	B	.	T	T	.	.	.
24	Y	M	.	.	.	.	.	B	.	.	.	B	.	T	T	.	S	S
25	V	M	.	E	.	.	.	B	.	.	.	B	.	T	T	.	.	S
26	L	M	.	.	.	.	.	B	.	.	.	B	.	T	T	.	S	S
27	V	M	.	.	.	.	.	B	.	.	.	B	.	.	T	.	S	S
28	L	M	.	.	.	.	.	B	.	.	.	B	.	.	T	.	S	S
29	F	M	.	.	.	.	.	.	.	.	.	B	.	.	T	.	.	S
30	G	M	.	.	.	E	.	B	.	.	B	B	.	.	T	.	.	.
31	T	M	.	.	.	E	.	.	.	.	B	B	.	T	T	.	.	.
32	G	M	.	.	.	E	.	B	.	.	B	.	.	T	T	.	.	.
33	V	M	.	.	.	.	E	.	.	.	B	.	.	T	T	.	S	S
34	L	M	.	.	.	.	.	B	.	.	B	.	.	T	T	.	S	S
35	A	M	.	.	.	.	.	B	.	.	B	.	.	T	T	.	S	.
36	A	M	.	.	.	.	.	B	.	.	B	.	B	T	T	.	.	.
37	L	M	.	.	.	.	.	B	.	.	B	.	B	T	T	.	S	S
38	K	M	E	.	.	E	E	.	.	.	B	.	B	T	T	.	.	.
39	F	M	E	E	.	E	E	.	B	.	B	.	B	T	T	.	S	S
40	D	o	E	E	.	E	E	.	B	.	B	.	B	T	T	.	.	.
41	R	o	E	E	E	E	E	.	B	.	B	B	B	T	T	.	.	S
42	A	o	E	E	E	E	E	.	B	.	B	.	B	T	T	.	.	.
43	G	o	.	E	E	E	E	.	B	.	B	.	B	T	T	.	.	.
44	N	o	.	E	E	E	E	.	B	B	B	.	B	T	T	.	.	.
45	I	o	.	.	E	E	E	.	B	B	B	.	B	T	T	.	.	S
46	G	o	.	.	E	.	E	.	B	B	.	.	B	T	.	.	.	.
47	Y	o	.	.	E	.	E	.	.	.	.	.	B	T	.	.	S	S
48	A	o	.	.	.	.	.	.	.	.	.	.	B	T	.	.	S	.
49	A	M	.	.	E	.	.	.	.	.	.	.	.	T	.	.	.	.
50	G	M	.	.	E	.	.	.	.	.	.	.	.	T	.	.	.	.
51	F	M	.	.	E	.	.	.	.	.	.	.	.	T	.	.	.	.
52	W	M	.	.	E	.	.	.	.	.	.	.	B	T	.	.	.	S
53	G	M	.	.	E	.	.	.	.	.	.	.	.	T	.	.	.	.
54	W	M	.	.	E	.	.	.	.	.	.	.	.	T	.	.	S	S
55	G	M	.	.	E	.	.	.	.	.	.	.	.	T	.	.	.	.
56	L	M	.	.	E	.	.	.	.	.	.	.	.	T	.	.	S	S
57	A	M	.	.	.	.	.	.	.	.	.	.	.	T	.	.	.	.
58	L	M	.	.	E	.	.	.	.	.	.	.	.	T	.	.	S	S
59	G	M	.	.	.	.	.	B	.	.	.	.	.	T	.	T	.	.
60	M	M	.	.	.	.	.	B	.	.	B	.	.	T	.	T	.	S
61	G	M	.	.	.	.	.	.	.	.	B	B	.	T	.	T	.	.
62	V	M	.	.	.	.	.	B	.	.	B	.	.	T	.	T	.	S
63	L	M	.	.	.	.	.	B	.	.	B	.	B	T	.	T	S	S
64	V	M	.	.	E	E	E	B	.	.	B	B	.	T	.	T	S	S
65	S	M	.	.	.	E	.	.	.	.	B	B	.	T	.	T	.	.
66	G	M	.	.	E	E	E	B	.	B	B	.	B	T	.	T	.	.
67	G	M	.	.	E	E	E	.	.	B	B	.	.	T	.	T	.	.
68	A	M	.	.	E	E	E	.	.	B	B	B	.	T	.	T	S	.
69	S	M	.	.	E	E	E	.	.	B	B	.	B	T	.	T	.	.
70	G	M	.	.	E	E	E	.	.	B	B	.	.	T	.	T	.	.
71	A	M	.	.	E	E	E	.	.	B	B	.	.	T	.	T	S	.
72	H	i	.	.	E	.	E	.	.	B	B	.	.	T	.	T	.	.
73	L	i	E	.	E	.	E	.	.	B	B	.	.	T	.	T	.	S
74	N	i	.	.	E	E	.	.	.	B	B	.	.	T	.	T	.	.
75	P	i	.	.	E	E	E	.	.	.	B	.	.	T	.	T	.	.
76	S	i	.	.	E	E	.	B	.	.	.	.	.	T	.	T	.	.
77	I	i	.	.	E	E	E	B	.	.	.	.	.	T	.	T	.	.
78	T	i	.	.	.	.	.	B	.	.	.	.	.	T	.	T	.	.
79	V	i	.	.	.	.	.	B	.	.	.	.	.	T	.	T	S	S
80	A	i	.	.	.	.	.	B	.	.	.	.	.	T	.	T	S	.
81	L	i	.	.	.	.	.	B	.	.	.	.	.	T	.	T	S	S
82	A	i	.	.	.	.	.	B	.	.	.	.	B	T	.	T	S	.
83	T	i	.	.	.	.	.	.	.	.	.	.	B	T	.	T	.	.
84	I	i	.	.	.	E	.	B	.	.	B	.	B	T	.	T	S	S
85	G	i	.	E	.	E	E	B	.	.	B	.	B	T	.	T	.	.
86	K	i	.	E	E	E	E	.	.	.	B	.	B	T	.	T	S	S
87	C	i	E	.	E	E	E	.	.	.	B	.	B	T	.	T	.	.
88	Q	i	E	E	E	.	E	.	B	.	B	B	B	T	.	T	.	.
89	W	i	.	.	.	.	E	B	B	.	B	B	B	T	T	T	S	S
90	R	i	E	E	E	E	E	B	B	.	B	.	B	T	T	T	.	.
91	K	i	E	.	E	E	E	.	.	.	B	B	B	T	T	T	.	.
92	V	M	E	.	E	E	.	B	.	.	B	B	B	T	T	T	.	.
93	P	M	E	.	.	.	.	B	.	.	B	B	B	T	T	T	.	.
94	H	M	.	.	.	.	.	B	.	.	B	B	B	T	T	T	.	.
95	Y	M	.	.	.	.	.	B	.	.	B	.	.	T	T	T	S	S
96	L	M	.	.	.	.	.	B	.	.	B	.	.	T	T	T	S	S
97	V	M	.	.	.	.	.	B	.	.	B	.	B	T	T	T	S	S
98	A	M	.	.	.	.	.	B	.	.	B	.	.	T	T	T	.	.
99	Q	M	.	.	.	.	.	B	.	.	B	.	.	T	T	T	.	.
100	Y	M	.	.	.	.	.	B	.	.	.	.	.	T	T	T	S	S
101	L	M	.	.	.	.	.	B	.	.	.	.	.	T	T	T	S	S
102	G	M	.	.	.	.	.	B	.	.	.	.	.	T	T	T	.	.
103	A	M	.	.	.	.	.	B	.	.	.	.	.	T	T	T	.	.
104	F	M	.	.	.	.	.	B	.	.	.	.	.	T	T	T	.	S
105	L	M	.	.	.	.	.	.	.	.	.	.	.	T	T	T	.	S
106	G	M	.	.	.	.	.	B	.	.	.	.	.	T	T	T	.	.
107	A	M	.	.	.	.	.	B	.	.	.	.	.	T	T	T	.	.
108	A	M	.	.	.	.	.	B	.	.	.	.	.	T	T	T	.	.
109	V	M	.	.	.	.	.	B	.	.	.	.	B	T	T	T	.	S
110	L	M	.	.	.	.	.	B	.	.	.	.	.	T	T	T	S	S
111	F	M	.	.	.	.	.	B	.	.	.	.	B	T	T	T	S	S
112	L	M	.	.	.	.	.	B	.	.	.	B	B	T	T	T	.	S
113	T	M	.	.	.	.	.	B	.	.	.	.	B	T	T	.	.	.
114	Y	M	E	.	.	E	.	.	.	.	B	.	B	T	T	.	S	S
115	K	o	E	.	.	E	.	.	.	.	B	.	B	T	.	.	S	S
116	G	o	E	E	E	E	E	.	.	.	B	.	B	T	.	.	.	.
117	A	o	E	E	E	E	E	.	.	B	B	.	B	T	.	.	.	.
118	F	o	E	.	E	E	E	.	B	B	B	.	B	T	.	.	.	S
119	D	o	E	E	E	E	E	.	B	B	B	.	B	T	.	.	.	.
120	N	o	E	E	E	E	E	.	B	B	B	.	B	T	.	.	.	.
121	Y	o	E	.	E	E	E	.	B	B	B	.	B	T	.	.	S	S
122	D	o	E	.	E	E	E	.	B	B	B	.	B	T	.	.	.	.
123	G	o	E	E	E	E	E	.	B	B	B	.	B	T	.	.	.	.
124	G	o	.	E	E	E	E	.	B	B	B	.	B	T	.	.	.	.
125	F	o	.	.	E	E	E	.	B	B	B	.	B	T	.	.	S	S
126	R	o	.	E	E	E	E	.	B	B	B	.	B	.	.	.	.	S
127	A	o	.	.	E	E	E	.	B	B	B	.	B	.	.	.	S	.
128	T	o	.	E	.	E	E	.	B	B	B	.	.	.	.	.	.	.
129	T	o	.	E	E	E	E	.	B	B	B	.	B	.	.	.	.	.
130	G	o	.	E	E	E	E	.	B	B	B	.	B	T	.	.	.	.
131	V	o	.	E	E	E	E	.	B	B	B	.	B	T	.	.	S	S
132	N	o	.	E	E	E	E	.	B	B	B	.	B	T	.	.	.	.
133	G	o	.	.	E	E	E	.	B	B	B	B	.	T	.	.	.	.
134	T	o	.	.	E	E	E	.	B	B	B	.	.	T	.	.	.	.
135	A	o	.	.	E	E	E	.	.	B	B	.	.	T	.	T	S	.
136	D	o	.	.	.	.	E	.	.	B	B	.	.	T	.	T	.	.
137	V	o	.	.	.	.	E	B	.	B	B	.	.	T	.	T	S	.
138	F	o	.	.	.	.	E	B	.	B	B	.	.	T	.	T	S	S
139	A	o	.	.	E	.	E	B	.	.	B	.	.	T	.	T	.	.
140	S	o	E	.	.	.	.	B	.	B	B	.	.	T	.	T	.	.
141	Y	o	E	.	E	E	E	.	.	.	B	B	.	T	.	T	S	.
142	P	o	E	.	E	E	E	.	.	.	B	B	.	T	.	T	.	.
143	R	o	E	.	E	E	E	B	.	B	B	.	B	T	.	T	S	.
144	D	o	.	E	E	E	E	B	.	B	B	.	B	T	.	T	.	.
145	F	o	.	E	E	E	E	.	.	B	B	.	B	T	.	T	.	S
146	V	M	.	.	E	E	E	.	.	B	B	.	B	T	.	T	.	S
147	G	M	.	.	E	E	E	.	.	B	B	.	B	T	.	T	.	.
148	T	M	.	.	E	E	E	B	.	.	B	.	B	T	.	T	.	.
149	G	M	.	.	E	E	E	B	.	.	B	.	B	T	.	T	S	.
150	N	M	.	.	E	E	E	.	.	.	B	.	B	T	.	.	.	.
151	C	M	.	.	E	.	E	.	.	.	B	.	.	T	.	.	.	S
152	F	M	.	.	E	.	E	.	.	.	.	.	B	T	.	.	.	S
153	L	M	.	.	E	.	.	B	.	.	.	B	B	T	.	.	S	S
154	D	M	.	.	.	E	.	.	.	.	.	B	.	T	.	.	.	.
155	Q	M	.	.	.	E	.	B	.	.	.	B	.	T	.	.	.	.
156	V	M	.	.	.	E	E	B	.	.	.	B	.	T	.	.	.	.
157	V	M	.	.	E	E	E	B	.	.	.	.	.	T	.	.	.	S
158	G	M	.	.	.	E	E	B	.	.	.	B	.	T	.	.	.	.
159	T	M	.	.	.	E	.	B	.	.	.	B	.	T	.	.	.	.
160	G	M	.	.	.	E	.	B	.	.	.	.	.	T	.	.	.	.
161	L	M	.	.	.	.	.	.	.	.	.	B	.	T	.	.	.	S
162	F	M	.	.	.	.	.	B	.	.	.	B	.	T	.	.	.	S
163	V	M	.	.	.	.	.	B	.	.	B	B	.	T	.	.	.	.
164	M	M	.	.	.	.	.	B	.	.	B	.	.	.	.	.	S	.
165	C	M	.	.	.	.	.	B	.	.	B	.	.	.	.	.	.	.
166	I	M	.	.	.	.	.	B	.	.	B	.	.	.	.	.	.	.
167	V	M	.	.	.	.	.	B	.	.	B	.	.	T	.	.	.	S
168	A	M	.	.	.	.	.	B	.	.	B	.	B	T	.	.	.	.
169	I	i	.	.	.	.	E	B	.	.	B	.	.	T	.	.	.	.
170	T	i	E	.	.	E	E	.	.	.	B	.	.	T	.	.	.	.
171	D	i	E	.	E	E	E	.	.	.	B	B	B	T	.	.	.	.
172	N	i	E	E	E	E	E	.	.	.	B	B	B	T	.	T	.	.
173	H	i	E	E	E	.	E	.	B	.	B	B	B	T	.	T	.	.
174	N	i	.	E	E	.	E	.	B	B	B	B	B	T	.	T	.	.
175	M	i	.	E	E	.	E	.	B	B	B	.	B	T	.	T	S	S
176	A	i	.	E	.	.	E	.	B	B	B	.	B	T	.	T	S	.
177	V	i	.	E	E	E	E	.	B	B	B	.	B	T	.	T	S	.
178	P	i	.	E	.	E	.	B	B	B	B	.	B	T	.	T	.	.
179	Q	i	.	E	.	E	E	B	B	B	.	.	B	T	.	T	.	.
180	G	i	E	.	E	E	E	B	B	.	.	B	B	T	.	T	.	.
181	L	M	.	.	E	E	.	B	B	.	.	.	B	T	T	T	S	S
182	Q	M	.	.	.	E	.	B	.	.	.	B	B	T	T	T	.	.
183	P	M	.	.	.	E	.	B	.	.	.	B	.	T	T	T	.	.
184	L	M	.	.	.	.	.	B	.	.	.	B	B	T	T	T	S	S
185	L	M	.	.	.	.	.	B	.	.	.	B	B	T	T	T	S	S
186	I	M	.	.	.	.	.	B	.	.	.	B	.	T	T	T	S	S
187	G	M	.	.	.	.	.	B	.	.	.	B	.	T	T	.	.	.
188	L	M	.	E	.	.	.	B	.	.	B	.	B	T	T	.	S	S
189	S	M	.	.	.	.	.	B	.	.	B	.	.	T	T	.	.	.
190	L	M	.	E	.	.	E	.	.	.	B	.	.	T	T	.	S	S
191	A	M	.	E	.	E	.	B	.	.	B	.	.	T	T	.	S	.
192	T	M	.	.	.	E	.	B	.	.	B	.	B	T	T	.	.	.
193	T	M	.	.	.	E	.	B	.	.	B	.	.	T	T	.	.	.
194	A	M	.	.	.	.	.	.	.	.	B	.	.	T	T	.	.	.
195	L	M	.	.	.	.	.	B	.	.	B	.	B	T	T	T	S	S
196	C	M	.	.	.	.	.	B	.	.	B	.	B	T	.	T	.	S
197	F	M	.	.	E	.	.	.	.	.	B	.	.	T	.	T	S	S
198	G	M	.	.	E	.	.	B	.	.	B	B	.	T	.	T	.	.
199	Y	M	.	.	E	.	E	B	.	.	B	.	B	T	.	T	S	S
200	N	M	.	.	E	.	E	.	.	.	B	.	B	.	.	T	.	.
201	C	M	.	.	E	.	E	.	.	.	B	.	.	.	.	T	.	.
202	G	M	.	.	E	.	E	B	.	B	B	.	.	.	.	T	.	.
203	A	M	.	.	E	.	E	.	.	B	B	.	.	T	.	T	.	.
204	P	o	.	.	E	.	E	B	.	B	B	.	.	T	.	T	.	.
205	L	o	.	.	E	E	E	.	.	B	B	.	.	T	.	T	S	S
206	N	o	E	.	E	E	E	.	.	B	B	.	.	T	.	T	.	.
207	P	o	E	.	E	E	E	.	.	B	B	B	.	T	.	T	.	.
208	A	o	E	.	E	E	E	.	.	B	B	.	.	T	.	T	.	.
209	R	o	E	.	E	E	E	.	.	B	B	.	.	T	.	T	.	.
210	D	o	E	.	E	E	E	.	.	B	B	.	.	T	.	.	.	.
211	L	o	E	.	E	E	E	.	.	B	B	B	.	T	.	.	S	S
212	G	o	.	.	E	E	E	.	.	.	B	.	.	T	.	.	.	.
213	P	o	.	.	E	E	.	.	.	.	B	.	.	T	.	.	.	.
214	R	o	.	.	.	E	.	.	.	.	.	.	.	T	.	.	.	.
215	I	o	.	.	.	.	.	.	.	.	.	.	.	T	.	.	.	.
216	F	o	.	.	.	.	.	.	.	.	.	.	.	T	.	.	S	S
217	T	o	.	.	.	.	.	.	.	.	.	.	.	T	.	.	.	.
218	A	o	.	.	.	.	.	.	.	.	B	.	B	T	.	.	S	.
219	M	o	.	.	.	.	.	.	.	.	B	.	B	T	.	.	S	S
220	A	o	.	.	E	.	E	.	.	.	B	.	B	T	.	.	S	.
221	G	o	.	.	E	.	E	.	.	B	B	.	B	T	.	.	.	.
222	W	o	.	.	E	.	E	.	.	.	B	.	.	T	.	.	S	S
223	G	o	.	E	E	E	E	.	B	.	B	.	B	T	.	.	.	.
224	T	o	.	E	E	E	.	.	B	.	B	.	B	T	.	.	.	.
225	E	o	.	E	.	E	.	.	B	.	B	.	B	T	.	.	.	.
226	V	o	.	.	.	.	.	.	B	.	B	.	.	T	.	.	S	.
227	F	o	.	.	.	.	.	.	B	.	B	.	B	T	.	.	S	S
228	S	o	.	E	.	.	E	.	B	.	B	.	B	T	.	.	.	.
229	F	o	E	E	.	.	.	B	B	.	B	.	B	T	.	.	.	S
230	R	o	E	E	E	E	E	.	B	.	B	B	B	T	T	T	.	.
231	D	o	E	E	E	E	E	.	B	.	B	B	B	T	T	T	.	.
232	Y	o	E	.	E	.	.	.	B	.	B	.	B	T	T	T	S	S
233	N	o	E	.	E	.	.	.	.	.	B	.	B	T	T	T	.	.
234	W	M	.	.	E	.	.	.	.	.	B	.	.	T	T	T	S	.
235	F	M	.	.	E	.	.	.	.	.	B	.	.	T	T	T	.	.
236	W	M	.	.	.	.	.	B	.	.	B	B	B	T	T	T	.	S
237	V	M	.	.	.	.	.	B	.	.	B	.	.	T	T	T	.	.
238	P	M	.	.	.	.	.	.	.	.	B	.	.	T	T	T	.	.
239	V	M	.	.	.	.	.	B	.	.	B	.	.	T	T	T	S	.
240	V	M	.	.	.	.	.	B	.	.	B	.	.	T	T	T	S	S
241	A	M	.	.	.	.	.	B	.	.	B	.	.	T	T	T	.	.
242	P	M	.	.	.	.	.	B	.	.	.	.	.	T	T	T	.	.
243	H	M	.	.	.	.	.	B	.	.	.	.	.	T	T	T	.	.
244	I	M	.	.	.	.	.	B	.	.	.	.	.	T	T	T	.	S
245	G	M	.	.	.	.	.	B	.	.	.	.	.	T	.	T	.	.
246	A	M	.	.	.	.	.	B	.	.	.	.	.	T	.	T	.	.
247	I	M	.	.	.	.	.	B	.	.	.	.	B	T	T	T	.	.
248	V	M	.	.	.	.	.	.	.	.	B	.	B	T	T	T	.	S
249	G	M	.	.	.	.	.	B	.	.	B	.	.	T	T	T	.	.
250	T	M	.	.	.	.	.	B	.	.	B	B	.	T	T	T	.	.
251	W	M	E	E	.	.	.	B	.	.	B	.	B	T	T	T	S	S
252	L	M	.	.	.	.	.	.	.	.	B	.	B	T	T	T	.	S
253	Y	M	.	.	.	.	.	B	.	.	B	B	B	T	T	T	S	S
254	R	M	.	E	.	.	.	B	.	.	B	B	B	T	T	T	S	.
255	L	M	.	.	.	.	.	B	.	.	B	B	B	T	T	T	S	S
256	L	M	.	.	.	.	.	B	.	.	B	B	B	T	T	T	.	S
257	V	i	.	.	.	.	.	B	.	.	B	B	B	T	T	T	S	S
258	G	i	.	.	.	.	.	B	.	.	B	B	B	T	T	T	.	.
259	L	i	.	.	.	.	.	B	B	.	B	.	B	T	T	T	S	S
260	H	i	.	E	E	.	.	B	B	.	B	.	B	T	T	T	.	.
261	W	i	E	E	E	E	E	.	B	.	B	.	B	T	T	T	S	S
262	P	i	E	E	E	E	E	.	B	B	B	.	.	T	.	.	.	.
263	Q	i	E	E	E	E	E	.	B	B	B	B	.	T	.	.	.	.
264	D	i	E	E	E	E	E	.	B	B	B	B	.	T	.	.	.	.
265	S	i	E	E	E	E	E	.	B	B	B	B	.	T	.	.	.	.
266	Y	i	E	E	E	E	E	.	B	B	B	B	.	T	.	.	S	S
267	D	i	E	E	E	E	E	.	B	B	B	B	.	T	.	.	.	.
268	M	i	E	E	E	E	E	.	B	B	B	B	.	T	.	.	S	S
269	E	i	E	E	E	E	E	.	B	B	B	B	.	T	.	.	.	.
270	Q	i	E	E	E	E	E	.	B	B	B	B	.	T	.	.	.	.
271	R	i	E	E	.	E	E	.	B	B	B	B	.	T	.	.	.	.
272	N	i	E	E	E	E	E	.	B	B	B	B	.	T	.	.	.	.
273	R	i	E	E	E	E	E	.	B	B	B	B	.	T	.	.	.	S
274	A	i	E	E	E	E	E	.	B	B	B	B	.	T	.	.	.	.
275	K	i	E	E	E	E	E	.	B	B	.	B	.	T	.	.	.	.
276	D	i	E	E	.	E	E	.	B	B	.	B	.	T	.	.	.	.
277	E	i	E	E	E	E	E	.	B	B	.	B	.	T	.	.	.	.
278	Y	i	E	E	E	.	E	.	B	B	B	B	.	T	.	.	S	S
279	M	i	.	E	E	.	E	.	B	B	B	.	.	T	.	.	.	.
280	P	i	.	E	E	.	E	.	B	B	B	.	.	T	.	.	.	.
281	I	i	.	E	E	.	.	.	B	B	B	.	.	T	.	.	S	S
282	G	i	.	E	E	E	E	.	B	B	B	.	.	T	.	.	.	.
283	G	i	.	E	E	E	E	.	B	B	B	.	.	T	.	.	.	.
284	Y	i	.	E	E	E	E	.	B	B	B	.	.	T	.	.	S	S
285	D	i	E	E	E	.	E	.	B	B	B	.	.	.	.	.	.	.
286	A	i	E	E	E	.	E	.	B	B	B	.	.	.	.	.	S	.
287	A	i	E	.	E	E	E	.	B	B	B	B	.	.	.	.	S	.
288	P	i	E	E	E	E	E	.	B	B	B	B	.	.	.	.	.	.
289	K	i	E	E	.	E	E	.	B	B	B	B	.	T	.	.	S	.
290	E	i	E	E	E	E	E	.	B	B	B	B	.	T	.	.	.	.
291	Q	i	E	E	E	E	E	.	B	B	B	B	.	T	.	.	.	.
292	Q	i	E	E	E	E	E	.	B	B	B	B	.	T	.	.	.	.
293	S	i	E	E	E	E	E	.	B	B	B	B	.	T	.	.	.	.
294	A	i	E	E	E	E	E	.	B	B	B	B	.	T	.	.	S	.
295	S	i	E	E	E	E	E	.	B	B	B	B	.	T	.	.	.	.
296	S	i	E	E	E	E	E	.	B	B	B	B	.	T	.	.	.	.
297	P	i	E	E	E	E	E	.	B	B	B	B	.	T	.	.	.	.
298	N	i	E	E	E	E	E	.	B	B	B	B	.	T	.	.	.	.
299	E	i	E	E	E	E	E	.	B	B	B	B	.	T	.	.	.	.
300	K	i	E	E	E	E	E	.	B	B	B	B	.	T	.	.	S	S
301	Q	i	E	E	E		E	.	B	B	B	B	.	T	.	.	.	.
302	S	i		E					.	B	B	B	.	T	.	.	.	.
303	K	i		E					.	B	B	B	.	T	.	.	S	.
304	V	i		E					.	B	.	B	.	T	.	.	S	S

## Sheet: Figure OmAQP15
	Position	1									10										20										30										40
Structure and exposure	Sequence	M	I	L	D	K	V	K	I	K	S	L	A	L	R	E	T	F	A	E	L	L	G	T	Y	V	L	V	L	F	G	T	G	V	L	A	A	L	K	F	D	R	A	G	N	I	G	Y	A
	TMHMM	i	i	i	i	i	i	i	i	i	i	i	i	i	i	i	i	i	i	i	M	M	M	M	M	M	M	M	M	M	M	M	M	M	M	M	M	M	M	M	o	o	o	o	o	o	o	o	o
	Emini (accesibility)			.	.	.	E	E	.	.	.	E	.	.	.	.	E	.	.	.	.	.	.	.	.	.	.	.	.	.	.	.	.	.	.	.	.	.	E	E	E	E	E	.	.	.	.	.	.
	BepiPred 2.0 (surface)	E	E	E	E	E	E	E	.	E	E	E	.	.	.	E	.	.	.	.	.	.	.	.	.	E	.	.	.	.	.	.	.	.	.	.	.	.	.	E	E	E	E	E	E	.	.	.	.
	Chou & Fasman (turns)				.	.	.	E	.	.	.	.	.	.	.	.	.	.	.	.	.	.	.	.	.	.	.	.	.	.	.	.	.	.	.	.	.	.	.	.	.	E	E	E	E	E	E	E	.
	Karplus & Scoultz (flexibility)				E	E	E	E	E	E	E	E	E	E	E	E	E	E	.	.	.	E	E	E	.	.	.	.	.	.	E	E	E	.	.	.	.	.	E	E	E	E	E	E	E	E	.	.	.
	Parker (hydrophilicity)				.	.	E	E	.	.	.	.	E	E	.	.	E	E	.	.	.	.	.	.	.	.	.	.	.	.	.	.	.	E	.	.	.	.	E	E	E	E	E	E	E	E	E	E	.
Linear and discontinuous B cell epitopes	Kolaskar & Tongaonkar				B	B	B	.	B	B	B	B	.	.	.	.	.	.	.	.	.	B	B	B	B	B	B	B	B	.	B	.	B	.	B	B	B	B	.	.	.	.	.	.	.	.	.	.	.
	BepiPred 2.0	.	.	.	.	B	B	B	B	B	B	.	.	.	.	.	.	.	.	.	.	.	.	.	.	.	.	.	.	.	.	.	.	.	.	.	.	.	.	B	B	B	B	B	B	B	B	.	.
	BepiPred 1.0	.	.	.	.	.	.	.	.	.	.	.	.	.	.	.	.	.	.	.	.	.	.	.	.	.	.	.	.	.	.	.	.	.	.	.	.	.	.	.	.	.	.	.	B	B	B	.	.
	ABCpred	.	.	.	.	.	.	.	.	.	.	.	.	.	.	.	.	.	.	.	.	.	.	.	.	.	.	.	.	.	B	B	B	B	B	B	B	B	B	B	B	B	B	B	B	B	.	.	.
	BcePred	.	.	.	.	B	B	B	.	.	.	.	B	.	.	.	B	B	.	.	.	.	B	B	B	B	B	B	B	B	B	B	.	.	.	.	.	.	.	.	.	B	.	.	.	.	.	.	.
	ElliPro (discontinuous)	.	.	.	.	.	.	.	.	.	B	B	B	B	B	B	B	B	.	.	.	.	.	.	.	.	.	.	.	.	.	.	.	.	.	.	B	B	B	B	B	B	B	B	B	B	B	B	B
T cell epitopes	MHC I IEDB Pig	.	.	T	T	T	T	T	T	T	T	T	T	T	T	T	T	T	T	T	T	T	T	T	T	T	T	.	.	.	.	T	T	T	T	T	T	T	T	T	T	T	T	T	T	T	T	T	T
	MHC II IEDB Human	.	.	.	.	.	.	T	T	T	T	T	T	T	T	T	T	T	T	T	T	T	T	T	T	T	T	T	T	T	T	T	T	T	T	T	T	T	T	T	T	T	T	T	T	T	.	.	.
	MHC II IEDB Mouse	T	T	T	T	T	T	T	T	T	T	T	T	T	T	T	.	.	.	.	.	.	.	.	.	.	.	.	.	.	.	.	.	.	.	.	.	.	.	.	.	.	.	.	.	.	.	.	.
Proteasomal processing	NetChop	.	.	S	.	.	.	.	.	S	.	S	.	S	.	.	.	S	.	.	S	.	.	.	S	.	S	S	S	.	.	.	.	S	S	S	.	S	.	S	.	.	.	.	.	.	.	S	S
	PCPS	.	.	S	.	.	S	.	S	S	.	S	.	S	.	.	.	S	.	.	S	S	.	.	S	S	S	S	S	S	.	.	.	S	S	.	.	S	.	S	.	S	.	.	.	S	.	S	.
	Antigenic peptides																																						OmAQP15_A
					Key OmAQP15:
					o (outside), extracellular; M, transmembrane; i, intracellular
					E, exposed on surface, predicted turns, hydrophilic
					F, predicted turns and flexibility
					B, B-cell epitope
					T, T-cell epitope
					S, predicted proteasome cut site
[truncated: 256 more columns]

## Sheet: TMHMM
TMHMM result
# OmAQP15 Length: 304
# OmAQP15 Number of predicted TMHs: 6
# OmAQP15 Exp number of AAs in TMHs: 125.32656
# OmAQP15 Exp number, first 60 AAs: 31.45232
# OmAQP15 Total prob of N-in: 0.74149
# OmAQP15 POSSIBLE N-term signal sequence
OmAQP15	TMHMM2.0	inside	1	19
OmAQP15	TMHMM2.0	TMhelix	20	39
OmAQP15	TMHMM2.0	outside	40	48
OmAQP15	TMHMM2.0	TMhelix	49	71
OmAQP15	TMHMM2.0	inside	72	91
OmAQP15	TMHMM2.0	TMhelix	92	114
OmAQP15	TMHMM2.0	outside	115	145
OmAQP15	TMHMM2.0	TMhelix	146	168
OmAQP15	TMHMM2.0	inside	169	180
OmAQP15	TMHMM2.0	TMhelix	181	203
OmAQP15	TMHMM2.0	outside	204	233
OmAQP15	TMHMM2.0	TMhelix	234	256
OmAQP15	TMHMM2.0	inside	257	304

## Sheet: Emini (accesibility)
Position	Residue	Start	End	Peptide	Score
3	L	1	6	MILDKV	0.399
4	D	2	7	ILDKVK	0.807
5	K	3	8	LDKVKI	0.807
6	V	4	9	DKVKIK	1956
7	K	5	10	KVKIKS	1.57
8	I	6	11	VKIKSL	0.647
9	K	7	12	KIKSLA	0.881
10	S	8	13	IKSLAL	0.363
11	L	9	14	KSLALR	1015
12	A	10	15	SLALRE	0.879
13	L	11	16	LALRET	0.947
14	R	12	17	ALRETF	0.994
15	E	13	18	LRETFA	0.994
16	T	14	19	RETFAE	2088
17	F	15	20	ETFAEL	0.879
18	A	16	21	TFAELL	0.419
19	E	17	22	FAELLG	0.287
20	L	18	23	AELLGT	0.478
21	L	19	24	ELLGTY	0.742
22	G	20	25	LLGTYV	0.318
23	T	21	26	LGTYVL	0.318
24	Y	22	27	GTYVLV	0.286
25	V	23	28	TYVLVL	0.239
26	L	24	29	YVLVLF	0.143
27	V	25	30	VLVLFG	0.09
28	L	26	31	LVLFGT	0.176
29	F	27	32	VLFGTG	0.211
30	G	28	33	LFGTGV	0.211
31	T	29	34	FGTGVL	0.211
32	G	30	35	GTGVLA	0.246
33	V	31	36	TGVLAA	0.251
34	L	32	37	GVLAAL	0.144
35	A	33	38	VLAALK	0.29
36	A	34	39	LAALKF	0.338
37	L	35	40	AALKFD	0.685
38	K	36	41	ALKFDR	1328
39	F	37	42	LKFDRA	1328
40	D	38	43	KFDRAG	1594
41	R	39	44	FDRAGN	1282
42	A	40	45	DRAGNI	1038
43	G	41	46	RAGNIG	0.615
44	N	42	47	AGNIGY	0.492
45	I	43	48	GNIGYA	0.492
46	G	44	49	NIGYAA	0.502
47	Y	45	50	IGYAAG	0.309
48	A	46	51	GYAAGF	0.382
49	A	47	52	YAAGFW	0.406
50	G	48	53	AAGFWG	0.256
51	F	49	54	AGFWGW	0.267
52	W	50	55	GFWGWG	0.261
53	G	51	56	FWGWGL	0.218
54	W	52	57	WGWGLA	0.254
55	G	53	58	GWGLAL	0.199
56	L	54	59	WGLALG	0.199
57	A	55	60	GLALGM	0.187
58	L	56	61	LALGMG	0.187
59	G	57	62	ALGMGV	0.169
60	M	58	63	LGMGVL	0.138
61	G	59	64	GMGVLV	0.124
62	V	60	65	MGVLVS	0.168
63	L	61	66	GVLVSG	0.168
64	V	62	67	VLVSGG	0.168
65	S	63	68	LVSGGA	0.228
66	G	64	69	VSGGAS	0.371
67	G	65	70	SGGASG	0.495
68	A	66	71	GGASGA	0.373
69	S	67	72	GASGAH	0.513
70	G	68	73	ASGAHL	0.428
71	A	69	74	SGAHLN	0.681
72	H	70	75	GAHLNP	0.785
73	L	71	76	AHLNPS	1063
74	N	72	77	HLNPSI	0.738
75	P	73	78	LNPSIT	0.783
76	S	74	79	NPSITV	0.704
77	I	75	80	PSITVA	0.443
78	T	76	81	SITVAL	0.236
79	V	77	82	ITVALA	0.178
80	A	78	83	TVALAT	0.366
81	L	79	84	VALATI	0.178
82	A	80	85	ALATIG	0.237
83	T	81	86	LATIGK	0.47
84	I	82	87	ATIGKC	0.305
85	G	83	88	TIGKCQ	0.523
86	K	84	89	IGKCQW	0.381
87	C	85	90	GKCQWR	1065
88	Q	86	91	KCQWRK	2153
89	W	87	92	CQWRKV	0.799
90	R	88	93	QWRKVP	2304
91	K	89	94	WRKVPH	1811
92	V	90	95	RKVPHY	2698
93	P	91	96	KVPHYL	1136
94	H	92	97	VPHYLV	0.422
95	Y	93	98	PHYLVA	0.574
96	L	94	99	HYLVAQ	0.643
97	V	95	100	YLVAQY	0.74
98	A	96	101	LVAQYL	0.39
99	Q	97	102	VAQYLG	0.467
100	Y	98	103	AQYLGA	0.636
101	L	99	104	QYLGAF	0.545
102	G	100	105	YLGAFL	0.26
103	A	101	106	LGAFLG	0.164
104	F	102	107	GAFLGA	0.201
105	L	103	108	AFLGAA	0.205
106	G	104	109	FLGAAV	0.151
107	A	105	110	LGAAVL	0.144
108	A	106	111	GAAVLF	0.151
109	V	107	112	AAVLFL	0.126
110	L	108	113	AVLFLT	0.179
111	F	109	114	VLFLTY	0.278
112	L	110	115	LFLTYK	0.75
113	T	111	116	FLTYKG	0.9
114	Y	112	117	LTYKGA	1.05
115	K	113	118	TYKGAF	1102
116	G	114	119	YKGAFD	1275
117	A	115	120	KGAFDN	1309
118	F	116	121	GAFDNY	1026
119	D	117	122	AFDNYD	1731
120	N	118	123	FDNYDG	1695
121	Y	119	124	DNYDGG	1937
122	D	120	125	NYDGGF	1005
123	G	121	126	YDGGFR	1224
124	G	122	127	DGGFRA	0.789
125	F	123	128	GGFRAT	0.682
126	R	124	129	GFRATT	0.994
127	A	125	130	FRATTG	0.994
128	T	126	131	RATTGV	0.852
129	T	127	132	ATTGVN	0.7
130	G	128	133	TTGVNG	0.685
131	V	129	134	TGVNGT	0.685
132	N	130	135	GVNGTA	0.48
133	G	131	136	VNGTAD	0.81
134	T	132	137	NGTADV	0.81
135	A	133	138	GTADVF	0.436
136	D	134	139	TADVFA	0.445
137	V	135	140	ADVFAS	0.413
138	F	136	141	DVFASY	0.641
139	A	137	142	VFASYP	0.593
140	S	138	143	FASYPR	1566
141	Y	139	144	ASYPRD	3.02
142	P	140	145	SYPRDF	2589
143	R	141	146	YPRDFV	1434
144	D	142	147	PRDFVG	0.906
145	F	143	148	RDFVGT	0.845
146	V	144	149	DFVGTG	0.427
147	G	145	150	FVGTGN	0.411
148	T	146	151	VGTGNC	0.255
149	G	147	152	GTGNCF	0.297
150	N	148	153	TGNCFL	0.248
151	C	149	154	GNCFLD	0.286
152	F	150	155	NCFLDQ	0.501
153	L	151	156	CFLDQV	0.231
154	D	152	157	FLDQVV	0.32
155	Q	153	158	LDQVVG	0.366
156	V	154	159	DQVVGT	0.641
157	V	155	160	QVVGTG	0.38
158	G	156	161	VVGTGL	0.181
159	T	157	162	VGTGLF	0.211
160	G	158	163	GTGLFV	0.211
161	L	159	164	TGLFVM	0.211
162	F	160	165	GLFVMC	0.078
163	V	161	166	LFVMCI	0.055
164	M	162	167	FVMCIV	0.05
165	C	163	168	VMCIVA	0.058
166	I	164	169	MCIVAI	0.055
167	V	165	170	CIVAIT	0.08
168	A	166	171	IVAITD	0.25
169	I	167	172	VAITDN	0.573
170	T	168	173	AITDNH	1051
171	D	169	174	ITDNHN	1674
172	N	170	175	TDNHNM	2363
173	H	171	176	DNHNMA	1654
174	N	172	177	NHNMAV	0.735
175	M	173	178	HNMAVP	0.707
176	A	174	179	NMAVPQ	0.9
177	V	175	180	MAVPQG	0.554
178	P	176	181	AVPQGL	0.461
179	Q	177	182	VPQGLQ	0.791
180	G	178	183	PQGLQP	1648
181	L	179	184	QGLQPL	0.879
182	Q	180	185	GLQPLL	0.418
183	P	181	186	LQPLLI	0.296
184	L	182	187	QPLLIG	0.356
185	L	183	188	PLLIGL	0.169
186	I	184	189	LLIGLS	0.147
187	G	185	190	LIGLSL	0.147
188	L	186	191	IGLSLA	0.18
189	S	187	192	GLSLAT	0.37
190	L	188	193	LSLATT	0.54
191	A	189	194	SLATTA	0.661
192	T	190	195	LATTAL	0.407
193	T	191	196	ATTALC	0.265
194	A	192	197	TTALCF	0.227
195	L	193	198	TALCFG	0.155
196	C	194	199	ALCFGY	0.169
197	F	195	200	LCFGYN	0.269
198	G	196	201	CFGYNC	0.175
199	Y	197	202	FGYNCG	0.322
200	N	198	203	GYNCGA	0.376
201	C	199	204	YNCGAP	0.588
202	G	200	205	NCGAPL	0.309
203	A	201	206	CGAPLN	0.309
204	P	202	207	GAPLNP	0.892
205	L	203	208	APLNPA	0.911
206	N	204	209	PLNPAR	1766
207	P	205	210	LNPARD	1908
208	A	206	211	NPARDL	1908
209	R	207	212	PARDLG	1174
210	D	208	213	ARDLGP	1174
211	L	209	214	RDLGPR	2276
212	G	210	215	DLGPRI	0.815
213	P	211	216	LGPRIF	0.422
214	R	212	217	GPRIFT	0.739
215	I	213	218	PRIFTA	0.755
216	F	214	219	RIFTAM	0.483
217	T	215	220	IFTAMA	0.249
218	A	216	221	FTAMAG	0.352
219	M	217	222	TAMAGW	0.427
220	A	218	223	AMAGWG	0.293
221	G	219	224	MAGWGT	0.418
222	W	220	225	AGWGTE	0.732
223	G	221	226	GWGTEV	0.538
224	T	222	227	WGTEVF	0.471
225	E	223	228	GTEVFS	0.6
226	V	224	229	TEVFSF	0.525
227	F	225	230	EVFSFR	0.712
228	S	226	231	VFSFRD	0.687
229	F	227	232	FSFRDY	1.45
230	R	228	233	SFRDYN	2692
231	D	229	234	FRDYNW	2113
232	Y	230	235	RDYNWF	2113
233	N	231	236	DYNWFW	1134
234	W	232	237	YNWFWV	0.504
235	F	233	238	NWFWVP	0.497
236	W	234	239	WFWVPV	0.23
237	V	235	240	FWVPVV	0.162
238	P	236	241	WVPVVA	0.189
239	V	237	242	VPVVAP	0.278
240	V	238	243	PVVAPH	0.51
241	A	239	244	VVAPHI	0.231
242	P	240	245	VAPHIG	0.308
243	H	241	246	APHIGA	0.419
244	I	242	247	PHIGAI	0.291
245	G	243	248	HIGAIV	0.14
246	A	244	249	IGAIVG	0.102
247	I	245	250	GAIVGT	0.209
248	V	246	251	AIVGTW	0.222
249	G	247	252	IVGTWL	0.181
250	T	248	253	VGTWLY	0.405
251	W	249	254	GTWLYR	1.07
252	L	250	255	TWLYRL	0.892
253	Y	251	256	WLYRLL	0.51
254	R	252	257	LYRLLV	0.36
255	L	253	258	YRLLVG	0.432
256	L	254	259	RLLVGL	0.227
257	V	255	260	LLVGLH	0.158
258	G	256	261	LVGLHW	0.201
259	L	257	262	VGLHWP	0.377
260	H	258	263	GLHWPQ	0.88
261	W	259	264	LHWPQD	1485
262	P	260	265	HWPQDS	2414
263	Q	261	266	WPQDSY	2.78
264	D	262	267	PQDSYD	4415
265	S	263	268	QDSYDM	2825
266	Y	264	269	DSYDME	2825
267	D	265	270	SYDMEQ	2.93
268	M	266	271	YDMEQR	4282
269	E	267	272	DMEQRN	4395
270	Q	268	273	MEQRNR	5155
271	R	269	274	EQRNRA	5262
272	N	270	275	QRNRAK	6077
273	R	271	276	RNRAKD	5.86
274	A	272	277	NRAKDE	5181
275	K	273	278	RAKDEY	5048
276	D	274	279	AKDEYM	2551
277	E	275	280	KDEYMP	3904
278	Y	276	281	DEYMPI	1368
279	M	277	282	EYMPIG	0.811
280	P	278	283	YMPIGG	0.463
281	I	279	284	MPIGGY	0.463
282	G	280	285	PIGGYD	0.782
283	G	281	286	IGGYDA	0.511
284	Y	282	287	GGYDAA	0.736
285	D	283	288	GYDAAP	1.15
286	A	284	289	YDAAPK	2325
287	A	285	290	DAAPKE	2.57
288	P	286	291	AAPKEQ	2665
289	K	287	292	APKEQQ	4568
290	E	288	293	PKEQQS	6.06
291	Q	289	294	KEQQSA	3959
292	Q	290	295	EQQSAS	2653
293	S	291	296	QQSASS	2053
294	A	292	297	QSASSP	1833
295	S	293	298	SASSPN	1702
296	S	294	299	ASSPNE	2.2
297	P	295	300	SSPNEK	4354
298	N	296	301	SPNEKQ	5627
299	E	297	302	PNEKQS	5627
300	K	298	303	NEKQSK	7277
301	Q	299	304	EKQSKV	3359

## Sheet: BepiPred 2.0 Surf
Entry	Position	AminoAcid	Exposed/ Buried	Relative Surface Accessilibity	Helix Probability	Sheet Probability	Coil Probability	Epitope Probability	Assignement B epit
OmAQP15	1	M	E	0.672	0.016	0.005	0.979	0.259444444444
OmAQP15	2	I	E	0.387	0.184	0.043	0.773	0.323
OmAQP15	3	L	E	0.424	0.268	0.043	0.689	0.387777777778
OmAQP15	4	D	E	0.611	0.353	0.048	0.598	0.446222222222
OmAQP15	5	K	E	0.428	0.522	0.016	0.462	0.507222222222	B
OmAQP15	6	V	E	0.426	0.622	0.015	0.363	0.517555555556	B
OmAQP15	7	K	E	0.613	0.522	0.016	0.462	0.539111111111	B
OmAQP15	8	I	B	0.21	0.339	0.016	0.645	0.541666666667	B
OmAQP15	9	K	E	0.358	0.116	0.016	0.868	0.521222222222	B
OmAQP15	10	S	E	0.403	0.782	0.003	0.215	0.502222222222	B
OmAQP15	11	L	E	0.465	0.923	0.002	0.076	0.484888888889
OmAQP15	12	A	B	0.113	0.970	0.001	0.029	0.454333333333
OmAQP15	13	L	B	0.04	0.970	0.001	0.029	0.431111111111
OmAQP15	14	R	B	0.181	0.988	0.000	0.012	0.399111111111
OmAQP15	15	E	E	0.261	0.988	0.000	0.012	0.379333333333
OmAQP15	16	T	B	0.045	0.988	0.000	0.012	0.348555555556
OmAQP15	17	F	B	0.083	0.988	0.000	0.012	0.333777777778
OmAQP15	18	A	B	0.062	0.988	0.000	0.012	0.330888888889
OmAQP15	19	E	B	0.091	0.988	0.000	0.012	0.314888888889
OmAQP15	20	L	B	0.108	0.988	0.000	0.012	0.304444444444
OmAQP15	21	L	B	0.19	0.988	0.000	0.012	0.296444444444
OmAQP15	22	G	B	0.113	0.988	0.000	0.012	0.289333333333
OmAQP15	23	T	B	0.134	0.988	0.000	0.012	0.285222222222
OmAQP15	24	Y	B	0.173	0.988	0.000	0.012	0.278777777778
OmAQP15	25	V	E	0.269	0.988	0.000	0.012	0.278888888889
OmAQP15	26	L	B	0.15	0.988	0.000	0.012	0.266666666667
OmAQP15	27	V	B	0.125	0.988	0.000	0.012	0.263111111111
OmAQP15	28	L	B	0.196	0.970	0.001	0.029	0.264
OmAQP15	29	F	B	0.211	0.970	0.001	0.029	0.252888888889
OmAQP15	30	G	B	0.137	0.970	0.001	0.029	0.262222222222
OmAQP15	31	T	B	0.12	0.923	0.002	0.076	0.267777777778
OmAQP15	32	G	B	0.085	0.923	0.002	0.076	0.279666666667
OmAQP15	33	V	B	0.06	0.923	0.002	0.076	0.293111111111
OmAQP15	34	L	B	0.063	0.878	0.010	0.111	0.322
OmAQP15	35	A	B	0.043	0.802	0.014	0.185	0.355888888889
OmAQP15	36	A	B	0.115	0.751	0.050	0.199	0.396333333333
OmAQP15	37	L	B	0.129	0.561	0.047	0.393	0.434111111111
OmAQP15	38	K	B	0.256	0.268	0.043	0.689	0.479111111111
OmAQP15	39	F	E	0.319	0.184	0.043	0.773	0.513666666667	B
OmAQP15	40	D	E	0.313	0.053	0.043	0.903	0.546222222222	B
OmAQP15	41	R	E	0.593	0.018	0.019	0.964	0.569777777778	B
OmAQP15	42	A	E	0.473	0.018	0.019	0.964	0.582555555556	B
OmAQP15	43	G	E	0.469	0.018	0.019	0.964	0.577333333333	B
OmAQP15	44	N	E	0.441	0.058	0.017	0.925	0.560333333333	B
OmAQP15	45	I	B	0.191	0.176	0.004	0.820	0.536	B
OmAQP15	46	G	B	0.241	0.246	0.004	0.750	0.504111111111	B
OmAQP15	47	Y	B	0.142	0.782	0.003	0.215	0.477111111111
OmAQP15	48	A	B	0.1	0.802	0.014	0.185	0.455555555556
OmAQP15	49	A	B	0.114	0.878	0.010	0.111	0.424111111111
OmAQP15	50	G	B	0.096	0.938	0.007	0.055	0.403
OmAQP15	51	F	B	0.095	0.970	0.001	0.029	0.380222222222
OmAQP15	52	W	B	0.231	0.970	0.001	0.029	0.366666666667
OmAQP15	53	G	B	0.167	0.970	0.001	0.029	0.356555555556
OmAQP15	54	W	B	0.21	0.970	0.001	0.029	0.347111111111
OmAQP15	55	G	B	0.185	0.988	0.000	0.012	0.333222222222
OmAQP15	56	L	B	0.269	0.970	0.001	0.029	0.321555555556
OmAQP15	57	A	B	0.203	0.970	0.001	0.029	0.303888888889
OmAQP15	58	L	B	0.168	0.970	0.001	0.029	0.304222222222
OmAQP15	59	G	B	0.155	0.970	0.001	0.029	0.297222222222
OmAQP15	60	M	B	0.203	0.970	0.001	0.029	0.292333333333
OmAQP15	61	G	B	0.12	0.923	0.002	0.076	0.284333333333
OmAQP15	62	V	B	0.11	0.938	0.007	0.055	0.292555555556
OmAQP15	63	L	B	0.14	0.938	0.007	0.055	0.306888888889
OmAQP15	64	V	B	0.124	0.878	0.010	0.111	0.332333333333
OmAQP15	65	S	B	0.051	0.802	0.014	0.185	0.348666666667
OmAQP15	66	G	B	0.152	0.502	0.002	0.495	0.369888888889
OmAQP15	67	G	B	0.284	0.321	0.003	0.675	0.380222222222
OmAQP15	68	A	B	0.136	0.176	0.004	0.820	0.392666666667
OmAQP15	69	S	B	0.068	0.053	0.004	0.942	0.404888888889
OmAQP15	70	G	B	0.136	0.058	0.017	0.925	0.410333333333
OmAQP15	71	A	B	0.055	0.058	0.017	0.925	0.404555555556
OmAQP15	72	H	B	0.065	0.113	0.043	0.844	0.388222222222
OmAQP15	73	L	B	0.034	0.181	0.017	0.803	0.361777777778
OmAQP15	74	N	B	0.046	0.116	0.016	0.868	0.335777777778
OmAQP15	75	P	B	0.04	0.782	0.003	0.215	0.306111111111
OmAQP15	76	S	B	0.029	0.923	0.002	0.076	0.280777777778
OmAQP15	77	I	B	0.043	0.878	0.010	0.111	0.263
OmAQP15	78	T	B	0.028	0.938	0.007	0.055	0.246111111111
OmAQP15	79	V	B	0.028	0.970	0.001	0.029	0.246777777778
OmAQP15	80	A	B	0.043	0.988	0.000	0.012	0.256666666667
OmAQP15	81	L	B	0.067	0.988	0.000	0.012	0.280666666667
OmAQP15	82	A	B	0.066	0.970	0.001	0.029	0.318444444444
OmAQP15	83	T	B	0.067	0.970	0.001	0.029	0.345666666667
OmAQP15	84	I	B	0.205	0.859	0.002	0.139	0.390222222222
OmAQP15	85	G	E	0.388	0.406	0.004	0.591	0.423444444444
OmAQP15	86	K	E	0.507	0.109	0.005	0.886	0.463222222222
OmAQP15	87	C	B	0.103	0.053	0.004	0.942	0.499111111111
OmAQP15	88	Q	E	0.489	0.053	0.004	0.942	0.501222222222	B
OmAQP15	89	W	B	0.217	0.176	0.004	0.820	0.501666666667	B
OmAQP15	90	R	E	0.34	0.246	0.004	0.750	0.502111111111	B
OmAQP15	91	K	B	0.275	0.339	0.016	0.645	0.481111111111
OmAQP15	92	V	B	0.046	0.660	0.049	0.291	0.457444444444
OmAQP15	93	P	B	0.102	0.831	0.044	0.125	0.420222222222
OmAQP15	94	H	B	0.165	0.911	0.033	0.057	0.391888888889
OmAQP15	95	Y	B	0.138	0.938	0.007	0.055	0.362222222222
OmAQP15	96	L	B	0.111	0.975	0.003	0.022	0.344777777778
OmAQP15	97	V	B	0.205	0.970	0.001	0.029	0.341111111111
OmAQP15	98	A	B	0.112	0.970	0.001	0.029	0.324666666667
OmAQP15	99	Q	B	0.148	0.970	0.001	0.029	0.296444444444
OmAQP15	100	Y	B	0.216	0.970	0.001	0.029	0.289888888889
OmAQP15	101	L	B	0.224	0.970	0.001	0.029	0.291666666667
OmAQP15	102	G	B	0.11	0.970	0.001	0.029	0.283
OmAQP15	103	A	B	0.079	0.988	0.000	0.012	0.281666666667
OmAQP15	104	F	B	0.184	0.988	0.000	0.012	0.271555555556
OmAQP15	105	L	B	0.136	0.988	0.000	0.012	0.257777777778
OmAQP15	106	G	B	0.049	0.988	0.000	0.012	0.242
OmAQP15	107	A	B	0.066	0.988	0.000	0.012	0.246777777778
OmAQP15	108	A	B	0.152	0.970	0.001	0.029	0.254444444444
OmAQP15	109	V	B	0.09	0.970	0.001	0.029	0.252
OmAQP15	110	L	B	0.039	0.975	0.003	0.022	0.264777777778
OmAQP15	111	F	B	0.133	0.938	0.007	0.055	0.301555555556
OmAQP15	112	L	B	0.136	0.878	0.010	0.111	0.332222222222
OmAQP15	113	T	B	0.102	0.802	0.014	0.185	0.363222222222
OmAQP15	114	Y	B	0.108	0.522	0.016	0.462	0.391888888889
OmAQP15	115	K	B	0.26	0.321	0.003	0.675	0.439666666667
OmAQP15	116	G	E	0.425	0.246	0.004	0.750	0.471888888889
OmAQP15	117	A	E	0.295	0.406	0.004	0.591	0.499111111111
OmAQP15	118	F	B	0.108	0.522	0.016	0.462	0.537666666667	B
OmAQP15	119	D	E	0.404	0.522	0.016	0.462	0.567222222222	B
OmAQP15	120	N	E	0.442	0.522	0.016	0.462	0.574111111111	B
OmAQP15	121	Y	B	0.205	0.430	0.016	0.555	0.581444444444	B
OmAQP15	122	D	B	0.298	0.268	0.043	0.689	0.599444444444	B
OmAQP15	123	G	E	0.363	0.113	0.043	0.844	0.594444444444	B
OmAQP15	124	G	E	0.311	0.113	0.087	0.800	0.589222222222	B
OmAQP15	125	F	B	0.247	0.118	0.150	0.732	0.597	B
OmAQP15	126	R	E	0.304	0.125	0.227	0.648	0.601222222222	B
OmAQP15	127	A	B	0.2	0.125	0.227	0.648	0.602555555556	B
OmAQP15	128	T	E	0.331	0.118	0.150	0.732	0.615111111111	B
OmAQP15	129	T	E	0.365	0.113	0.087	0.800	0.611777777778	B
OmAQP15	130	G	E	0.336	0.113	0.043	0.844	0.599333333333	B
OmAQP15	131	V	E	0.325	0.184	0.043	0.773	0.574666666667	B
OmAQP15	132	N	E	0.426	0.184	0.043	0.773	0.573	B
OmAQP15	133	G	B	0.178	0.113	0.043	0.844	0.556111111111	B
OmAQP15	134	T	B	0.248	0.118	0.150	0.732	0.516333333333	B
OmAQP15	135	A	B	0.145	0.056	0.142	0.802	0.482333333333
OmAQP15	136	D	B	0.126	0.018	0.141	0.840	0.445222222222
OmAQP15	137	V	B	0.074	0.021	0.452	0.528	0.411222222222
OmAQP15	138	F	B	0.046	0.022	0.552	0.426	0.399
OmAQP15	139	A	B	0.04	0.024	0.655	0.322	0.402222222222
OmAQP15	140	S	B	0.068	0.022	0.552	0.426	0.418777777778
OmAQP15	141	Y	B	0.105	0.022	0.359	0.619	0.430333333333
OmAQP15	142	P	B	0.147	0.018	0.088	0.893	0.438222222222
OmAQP15	143	R	B	0.216	0.018	0.047	0.935	0.449555555556
OmAQP15	144	D	E	0.286	0.018	0.047	0.935	0.468777777778
OmAQP15	145	F	E	0.363	0.053	0.043	0.903	0.48
OmAQP15	146	V	B	0.107	0.113	0.043	0.844	0.475888888889
OmAQP15	147	G	B	0.103	0.181	0.017	0.803	0.459777777778
OmAQP15	148	T	B	0.163	0.622	0.015	0.363	0.440333333333
OmAQP15	149	G	B	0.153	0.622	0.015	0.363	0.406777777778
OmAQP15	150	N	B	0.124	0.600	0.003	0.397	0.382555555556
OmAQP15	151	C	B	0.068	0.802	0.014	0.185	0.370666666667
OmAQP15	152	F	B	0.074	0.878	0.010	0.111	0.361111111111
OmAQP15	153	L	B	0.141	0.923	0.002	0.076	0.347888888889
OmAQP15	154	D	B	0.167	0.970	0.001	0.029	0.334777777778
OmAQP15	155	Q	B	0.074	0.988	0.000	0.012	0.321777777778
OmAQP15	156	V	B	0.113	0.988	0.000	0.012	0.319111111111
OmAQP15	157	V	B	0.145	0.988	0.000	0.012	0.323888888889
OmAQP15	158	G	B	0.112	0.988	0.000	0.012	0.323555555556
OmAQP15	159	T	B	0.07	0.988	0.000	0.012	0.308888888889
OmAQP15	160	G	B	0.128	0.988	0.000	0.012	0.288111111111
OmAQP15	161	L	B	0.166	0.988	0.000	0.012	0.266222222222
OmAQP15	162	F	B	0.118	0.970	0.001	0.029	0.244
OmAQP15	163	V	B	0.089	0.970	0.001	0.029	0.227555555556
OmAQP15	164	M	B	0.171	0.975	0.003	0.022	0.224555555556
OmAQP15	165	C	B	0.074	0.938	0.007	0.055	0.218
OmAQP15	166	I	B	0.066	0.911	0.033	0.057	0.212111111111
OmAQP15	167	V	B	0.06	0.870	0.077	0.053	0.229444444444
OmAQP15	168	A	B	0.069	0.779	0.101	0.120	0.269888888889
OmAQP15	169	I	B	0.042	0.649	0.163	0.188	0.320555555556
OmAQP15	170	T	B	0.074	0.307	0.165	0.527	0.379777777778
OmAQP15	171	D	B	0.18	0.184	0.043	0.773	0.437555555556
OmAQP15	172	N	E	0.509	0.116	0.016	0.868	0.493888888889
OmAQP15	173	H	E	0.589	0.053	0.004	0.942	0.529777777778	B
OmAQP15	174	N	E	0.456	0.109	0.005	0.886	0.565666666667	B
OmAQP15	175	M	E	0.445	0.058	0.017	0.925	0.604	B
OmAQP15	176	A	E	0.474	0.058	0.017	0.925	0.618444444444	B
OmAQP15	177	V	E	0.279	0.018	0.019	0.964	0.611555555556	B
OmAQP15	178	P	E	0.319	0.018	0.019	0.964	0.599222222222	B
OmAQP15	179	Q	E	0.431	0.109	0.005	0.886	0.577333333333	B
OmAQP15	180	G	B	0.239	0.246	0.004	0.750	0.544111111111	B
OmAQP15	181	L	B	0.194	0.502	0.002	0.495	0.506666666667	B
OmAQP15	182	Q	B	0.206	0.694	0.003	0.303	0.479555555556
OmAQP15	183	P	B	0.141	0.923	0.002	0.076	0.453111111111
OmAQP15	184	L	B	0.203	0.970	0.001	0.029	0.409
OmAQP15	185	L	B	0.225	0.970	0.001	0.029	0.380222222222
OmAQP15	186	I	B	0.205	0.970	0.001	0.029	0.359111111111
OmAQP15	187	G	B	0.245	0.988	0.000	0.012	0.331666666667
OmAQP15	188	L	E	0.329	0.988	0.000	0.012	0.311555555556
OmAQP15	189	S	B	0.204	0.988	0.000	0.012	0.299222222222
OmAQP15	190	L	E	0.237	0.988	0.000	0.012	0.300666666667
OmAQP15	191	A	E	0.234	0.970	0.001	0.029	0.300333333333
OmAQP15	192	T	B	0.237	0.970	0.001	0.029	0.302
OmAQP15	193	T	B	0.236	0.970	0.001	0.029	0.316555555556
OmAQP15	194	A	B	0.199	0.970	0.001	0.029	0.313555555556
OmAQP15	195	L	B	0.178	0.923	0.002	0.076	0.325444444444
OmAQP15	196	C	B	0.174	0.923	0.002	0.076	0.349111111111
OmAQP15	197	F	B	0.132	0.782	0.003	0.215	0.361777777778
OmAQP15	198	G	B	0.084	0.694	0.003	0.303	0.387444444444
OmAQP15	199	Y	B	0.242	0.600	0.003	0.397	0.398
OmAQP15	200	N	B	0.29	0.406	0.004	0.591	0.404
OmAQP15	201	C	B	0.094	0.246	0.004	0.750	0.412777777778
OmAQP15	202	G	B	0.144	0.109	0.005	0.886	0.418666666667
OmAQP15	203	A	B	0.125	0.058	0.017	0.925	0.428
OmAQP15	204	P	B	0.049	0.053	0.043	0.903	0.407444444444
OmAQP15	205	L	B	0.034	0.113	0.087	0.800	0.393888888889
OmAQP15	206	N	B	0.077	0.184	0.043	0.773	0.389666666667
OmAQP15	207	P	B	0.059	0.622	0.015	0.363	0.367888888889
OmAQP15	208	A	B	0.027	0.717	0.014	0.269	0.352444444444
OmAQP15	209	R	B	0.097	0.600	0.003	0.397	0.341555555556
OmAQP15	210	D	B	0.071	0.600	0.003	0.397	0.332444444444
OmAQP15	211	L	B	0.047	0.694	0.003	0.303	0.309111111111
OmAQP15	212	G	B	0.028	0.694	0.003	0.303	0.293444444444
OmAQP15	213	P	B	0.061	0.782	0.003	0.215	0.289333333333
OmAQP15	214	R	B	0.089	0.859	0.002	0.139	0.282666666667
OmAQP15	215	I	B	0.049	0.859	0.002	0.139	0.283222222222
OmAQP15	216	F	B	0.043	0.782	0.003	0.215	0.291888888889
OmAQP15	217	T	B	0.092	0.694	0.003	0.303	0.315111111111
OmAQP15	218	A	B	0.121	0.622	0.015	0.363	0.341333333333
OmAQP15	219	M	B	0.167	0.522	0.016	0.462	0.365555555556
OmAQP15	220	A	B	0.072	0.339	0.016	0.645	0.405888888889
OmAQP15	221	G	B	0.231	0.181	0.017	0.803	0.448666666667
OmAQP15	222	W	B	0.265	0.116	0.016	0.868	0.486666666667
OmAQP15	223	G	E	0.4	0.109	0.005	0.886	0.517555555556	B
OmAQP15	224	T	E	0.457	0.109	0.005	0.886	0.547222222222	B
OmAQP15	225	E	E	0.577	0.116	0.016	0.868	0.567777777778	B
OmAQP15	226	V	B	0.289	0.058	0.017	0.925	0.586111111111	B
OmAQP15	227	F	B	0.235	0.058	0.017	0.925	0.589666666667	B
OmAQP15	228	S	E	0.475	0.058	0.017	0.925	0.588777777778	B
OmAQP15	229	F	E	0.51	0.058	0.017	0.925	0.579444444444	B
OmAQP15	230	R	E	0.435	0.018	0.019	0.964	0.561333333333	B
OmAQP15	231	D	E	0.351	0.018	0.019	0.964	0.539222222222	B
OmAQP15	232	Y	B	0.134	0.018	0.019	0.964	0.518555555556	B
OmAQP15	233	N	B	0.242	0.018	0.047	0.935	0.469
OmAQP15	234	W	B	0.134	0.066	0.296	0.638	0.438444444444
OmAQP15	235	F	B	0.07	0.159	0.516	0.325	0.392555555556
OmAQP15	236	W	B	0.114	0.373	0.401	0.226	0.361888888889
OmAQP15	237	V	B	0.053	0.662	0.225	0.114	0.326888888889
OmAQP15	238	P	B	0.097	0.779	0.101	0.120	0.302666666667
OmAQP15	239	V	B	0.118	0.870	0.077	0.053	0.290777777778
OmAQP15	240	V	B	0.151	0.831	0.044	0.125	0.284555555556
OmAQP15	241	A	B	0.084	0.802	0.014	0.185	0.267111111111
OmAQP15	242	P	B	0.122	0.859	0.002	0.139	0.276111111111
OmAQP15	243	H	B	0.218	0.970	0.001	0.029	0.279333333333
OmAQP15	244	I	B	0.245	0.970	0.001	0.029	0.280888888889
OmAQP15	245	G	B	0.112	0.970	0.001	0.029	0.279777777778
OmAQP15	246	A	B	0.09	0.988	0.000	0.012	0.296111111111
OmAQP15	247	I	B	0.233	0.988	0.000	0.012	0.319
OmAQP15	248	V	B	0.219	0.988	0.000	0.012	0.320666666667
OmAQP15	249	G	B	0.106	0.988	0.000	0.012	0.325666666667
OmAQP15	250	T	B	0.121	0.988	0.000	0.012	0.346888888889
OmAQP15	251	W	E	0.252	0.988	0.000	0.012	0.360666666667
OmAQP15	252	L	B	0.103	0.988	0.000	0.012	0.349222222222
OmAQP15	253	Y	B	0.085	0.988	0.000	0.012	0.366777777778
OmAQP15	254	R	E	0.28	0.970	0.001	0.029	0.393111111111
OmAQP15	255	L	B	0.164	0.970	0.001	0.029	0.422222222222
OmAQP15	256	L	B	0.034	0.938	0.007	0.055	0.436222222222
OmAQP15	257	V	B	0.116	0.802	0.014	0.185	0.460333333333
OmAQP15	258	G	B	0.228	0.339	0.016	0.645	0.487888888889
OmAQP15	259	L	B	0.291	0.109	0.005	0.886	0.515333333333	B
OmAQP15	260	H	E	0.586	0.016	0.005	0.979	0.541888888889	B
OmAQP15	261	W	E	0.299	0.016	0.005	0.979	0.588222222222	B
OmAQP15	262	P	E	0.549	0.018	0.019	0.964	0.608555555556	B
OmAQP15	263	Q	E	0.555	0.018	0.019	0.964	0.613555555556	B
OmAQP15	264	D	E	0.63	0.016	0.005	0.979	0.608333333333	B
OmAQP15	265	S	E	0.561	0.053	0.004	0.942	0.612	B
OmAQP15	266	Y	E	0.46	0.246	0.004	0.750	0.614222222222	B
OmAQP15	267	D	E	0.628	0.406	0.004	0.591	0.614111111111	B
OmAQP15	268	M	E	0.462	0.502	0.002	0.495	0.608222222222	B
OmAQP15	269	E	E	0.604	0.622	0.015	0.363	0.605555555556	B
OmAQP15	270	Q	E	0.486	0.717	0.014	0.269	0.596777777778	B
OmAQP15	271	R	E	0.432	0.717	0.014	0.269	0.603	B
OmAQP15	272	N	E	0.605	0.717	0.014	0.269	0.611888888889	B
OmAQP15	273	R	E	0.419	0.717	0.014	0.269	0.621222222222	B
OmAQP15	274	A	E	0.316	0.622	0.015	0.363	0.626555555556	B
OmAQP15	275	K	E	0.606	0.455	0.046	0.498	0.643	B
OmAQP15	276	D	E	0.605	0.386	0.097	0.517	0.643444444444	B
OmAQP15	277	E	E	0.534	0.307	0.165	0.527	0.634777777778	B
OmAQP15	278	Y	E	0.384	0.199	0.152	0.649	0.635333333333	B
OmAQP15	279	M	E	0.384	0.199	0.152	0.649	0.630555555556	B
OmAQP15	280	P	E	0.483	0.199	0.152	0.649	0.625333333333	B
OmAQP15	281	I	E	0.282	0.113	0.087	0.800	0.625666666667	B
OmAQP15	282	G	E	0.605	0.113	0.087	0.800	0.614	B
OmAQP15	283	G	E	0.416	0.053	0.043	0.903	0.601444444444	B
OmAQP15	284	Y	E	0.487	0.113	0.043	0.844	0.586888888889	B
OmAQP15	285	D	E	0.672	0.113	0.043	0.844	0.592555555556	B
OmAQP15	286	A	E	0.402	0.113	0.043	0.844	0.610222222222	B
OmAQP15	287	A	B	0.26	0.184	0.043	0.773	0.626222222222	B
OmAQP15	288	P	E	0.468	0.184	0.043	0.773	0.657333333333	B
OmAQP15	289	K	E	0.574	0.184	0.043	0.773	0.671333333333	B
OmAQP15	290	E	E	0.551	0.184	0.043	0.773	0.687333333333	B
OmAQP15	291	Q	E	0.571	0.113	0.087	0.800	0.708666666667	B
OmAQP15	292	Q	E	0.446	0.052	0.084	0.864	0.720555555556	B
OmAQP15	293	S	E	0.394	0.018	0.088	0.893	0.724222222222	B
OmAQP15	294	A	E	0.497	0.018	0.047	0.935	0.724111111111	B
OmAQP15	295	S	E	0.455	0.018	0.019	0.964	0.716222222222	B
OmAQP15	296	S	E	0.421	0.058	0.017	0.925	0.700111111111	B
OmAQP15	297	P	E	0.338	0.321	0.003	0.675	0.684777777778	B
OmAQP15	298	N	E	0.629	0.406	0.004	0.591	0.668888888889	B
OmAQP15	299	E	E	0.555	0.430	0.016	0.555	0.654	B
OmAQP15	300	K	E	0.42	0.430	0.016	0.555	0.632666666667	B
OmAQP15	301	Q	E	0.549	0.353	0.048	0.598	0.557444444444	B
OmAQP15	302	S	E	0.692	0.307	0.165	0.527	0.483555555556
OmAQP15	303	K	E	0.578	0.199	0.152	0.649	0.410444444444
OmAQP15	304	V	E	0.734	0.005	0.015	0.979	0.338777777778

## Sheet: Chou_Fasman (turns)
Position	Residue	Start	End	Peptide	Score
4	D	1	7	MILDKVK	0.806
5	K	2	8	ILDKVKI	0.787
6	V	3	9	LDKVKIK	0.864
7	K	4	10	DKVKIKS	0.984
8	I	5	11	KVKIKSL	0.86
9	K	6	12	VKIKSLA	0.81
10	S	7	13	KIKSLAL	0.823
11	L	8	14	IKSLALR	0.814
12	A	9	15	KSLALRE	0.853
13	L	10	16	SLALRET	0.846
14	R	11	17	LALRETF	0.727
15	E	12	18	ALRETFA	0.737
16	T	13	19	LRETFAE	0.749
17	F	14	20	RETFAEL	0.749
18	A	15	21	ETFAELL	0.697
19	E	16	22	TFAELLG	0.814
20	L	17	23	FAELLGT	0.814
21	L	18	24	AELLGTY	0.891
22	G	19	25	ELLGTYV	0.869
23	T	20	26	LLGTYVL	0.847
24	Y	21	27	LGTYVLV	0.834
25	V	22	28	GTYVLVL	0.834
26	L	23	29	TYVLVLF	0.697
27	V	24	30	YVLVLFG	0.783
28	L	25	31	VLVLFGT	0.757
29	F	26	32	LVLFGTG	0.909
30	G	27	33	VLFGTGV	0.896
31	T	28	34	LFGTGVL	0.909
32	G	29	35	FGTGVLA	0.919
33	V	30	36	GTGVLAA	0.927
34	L	31	37	TGVLAAL	0.789
35	A	32	38	GVLAALK	0.796
36	A	33	39	VLAALKF	0.659
37	L	34	40	LAALKFD	0.796
38	K	35	41	AALKFDR	0.847
39	F	36	42	ALKFDRA	0.847
40	D	37	43	LKFDRAG	0.976
41	R	38	44	KFDRAGN	1114
42	A	39	45	FDRAGNI	1037
43	G	40	46	DRAGNIG	1174
44	N	41	47	RAGNIGY	1129
45	I	42	48	AGNIGYA	1087
46	G	43	49	GNIGYAA	1087
47	Y	44	50	NIGYAAG	1087
48	A	45	51	IGYAAGF	0.95
49	A	46	52	GYAAGFW	1.02
50	G	47	53	YAAGFWG	1.02
51	F	48	54	AAGFWGW	0.994
52	W	49	55	AGFWGWG	1123
53	G	50	56	GFWGWGL	1113
54	W	51	57	FWGWGLA	0.984
55	G	52	58	WGWGLAL	0.983
56	L	53	59	GWGLALG	1069
57	A	54	60	WGLALGM	0.931
58	L	55	61	GLALGMG	1017
59	G	56	62	LALGMGV	0.866
60	M	57	63	ALGMGVL	0.866
61	G	58	64	LGMGVLV	0.843
62	V	59	65	GMGVLVS	0.963
63	L	60	66	MGVLVSG	0.963
64	V	61	67	GVLVSGG	1.1
65	S	62	68	VLVSGGA	0.971
66	G	63	69	LVSGGAS	1104
67	G	64	70	VSGGASG	1243
68	A	65	71	SGGASGA	1266
69	S	66	72	GGASGAH	1197
70	G	67	73	GASGAHL	1059
71	A	68	74	ASGAHLN	1059
72	H	69	75	SGAHLNP	1181
73	L	70	76	GAHLNPS	1181
74	N	71	77	AHLNPSI	1026
75	P	72	78	HLNPSIT	1069
76	S	73	79	LNPSITV	1004
77	I	74	80	NPSITVA	1014
78	T	75	81	PSITVAL	0.876
79	V	76	82	SITVALA	0.753
80	A	77	83	ITVALAT	0.686
81	L	78	84	TVALATI	0.686
82	A	79	85	VALATIG	0.771
83	T	80	86	ALATIGK	0.844
84	I	81	87	LATIGKC	0.92
85	G	82	88	ATIGKCQ	0.976
86	K	83	89	TIGKCQW	1019
87	C	84	90	IGKCQWR	1017
88	Q	85	91	GKCQWRK	1094
89	W	86	92	KCQWRKV	0.943
90	R	87	93	CQWRKVP	1016
91	K	88	94	QWRKVPH	0.981
92	V	89	95	WRKVPHY	1004
93	P	90	96	RKVPHYL	0.951
94	H	91	97	KVPHYLV	0.887
95	Y	92	98	VPHYLVA	0.837
96	L	93	99	PHYLVAQ	0.906
97	V	94	100	HYLVAQY	0.851
98	A	95	101	YLVAQYL	0.8
99	Q	96	102	LVAQYLG	0.86
100	Y	97	103	VAQYLGA	0.87
101	L	98	104	AQYLGAF	0.884
102	G	99	105	QYLGAFL	0.874
103	A	100	106	YLGAFLG	0.957
104	F	101	107	LGAFLGA	0.889
105	L	102	108	GAFLGAA	0.899
106	G	103	109	AFLGAAV	0.747
107	A	104	110	FLGAAVL	0.737
108	A	105	111	LGAAVLF	0.737
109	V	106	112	GAAVLFL	0.737
110	L	107	113	AAVLFLT	0.651
111	F	108	114	AVLFLTY	0.72
112	L	109	115	VLFLTYK	0.77
113	T	110	116	LFLTYKG	0.921
114	Y	111	117	FLTYKGA	0.931
115	K	112	118	LTYKGAF	0.931
116	G	113	119	TYKGAFD	1056
117	A	114	120	YKGAFDN	1141
118	F	115	121	KGAFDNY	1141
119	D	116	122	GAFDNYD	1206
120	N	117	123	AFDNYDG	1206
121	Y	118	124	FDNYDGG	1334
122	D	119	125	DNYDGGF	1334
123	G	120	126	NYDGGFR	1261
124	G	121	127	YDGGFRA	1133
125	F	122	128	DGGFRAT	1107
126	R	123	129	GGFRATT	1036
127	A	124	130	GFRATTG	1036
128	T	125	131	FRATTGV	0.884
129	T	126	132	RATTGVN	1021
130	G	127	133	ATTGVNG	1109
131	V	128	134	TTGVNGT	1151
132	N	129	135	TGVNGTA	1109
133	G	130	136	GVNGTAD	1.18
134	T	131	137	VNGTADV	1029
135	A	132	138	NGTADVF	1043
136	D	133	139	GTADVFA	0.914
137	V	134	140	TADVFAS	0.896
138	F	135	141	ADVFASY	0.921
139	A	136	142	DVFASYP	1044
140	S	137	143	VFASYPR	0.971
141	Y	138	144	FASYPRD	1109
142	P	139	145	ASYPRDF	1109
143	R	140	146	SYPRDFV	1086
144	D	141	147	YPRDFVG	1104
145	F	142	148	PRDFVGT	1079
146	V	143	149	RDFVGTG	1084
147	G	144	150	DFVGTGN	1171
148	T	145	151	FVGTGNC	1133
149	G	146	152	VGTGNCF	1133
150	N	147	153	GTGNCFL	1146
151	C	148	154	TGNCFLD	1131
152	F	149	155	GNCFLDQ	1134
153	L	150	156	NCFLDQV	0.983
154	D	151	157	CFLDQVV	0.831
155	Q	152	158	FLDQVVG	0.884
156	V	153	159	LDQVVGT	0.936
157	V	154	160	DQVVGTG	1074
158	G	155	161	QVVGTGL	0.95
159	T	156	162	VVGTGLF	0.896
160	G	157	163	VGTGLFV	0.896
161	L	158	164	GTGLFVM	0.91
162	F	159	165	TGLFVMC	0.857
163	V	160	166	GLFVMCI	0.787
164	M	161	167	LFVMCIV	0.636
165	C	162	168	FVMCIVA	0.646
166	I	163	169	VMCIVAI	0.627
167	V	164	170	MCIVAIT	0.693
168	A	165	171	CIVAITD	0.816
169	I	166	172	IVAITDN	0.869
170	T	167	173	VAITDNH	0.937
171	D	168	174	AITDNHN	1089
172	N	169	175	ITDNHNM	1.08
173	H	170	176	TDNHNMA	1107
174	N	171	177	DNHNMAV	1041
175	M	172	178	NHNMAVP	1.05
176	A	173	179	HNMAVPQ	0.967
177	V	174	180	NMAVPQG	1054
178	P	175	181	MAVPQGL	0.916
179	Q	176	182	AVPQGLQ	0.97
180	G	177	183	VPQGLQP	1093
181	L	178	184	PQGLQPL	1106
182	Q	179	185	QGLQPLL	0.973
183	P	180	186	GLQPLLI	0.9
184	L	181	187	LQPLLIG	0.9
185	L	182	188	QPLLIGL	0.9
186	I	183	189	PLLIGLS	0.964
187	G	184	190	LLIGLSL	0.831
188	L	185	191	LIGLSLA	0.841
189	S	186	192	IGLSLAT	0.894
190	L	187	193	GLSLATT	0.964
191	A	188	194	LSLATTA	0.836
192	T	189	195	SLATTAL	0.836
193	T	190	196	LATTALC	0.801
194	A	191	197	ATTALCF	0.803
195	L	192	198	TTALCFG	0.931
196	C	193	199	TALCFGY	0.957
197	F	194	200	ALCFGYN	1043
198	G	195	201	LCFGYNC	1119
199	Y	196	202	CFGYNCG	1257
200	N	197	203	FGYNCGA	1181
201	C	198	204	GYNCGAP	1313
202	G	199	205	YNCGAPL	1174
203	A	200	206	NCGAPLN	1234
204	P	201	207	CGAPLNP	1229
205	L	202	208	GAPLNPA	1153
206	N	203	209	APLNPAR	1066
207	P	204	210	PLNPARD	1.18
208	A	205	211	LNPARDL	1047
209	R	206	212	NPARDLG	1186
210	D	207	213	PARDLGP	1.18
211	L	208	214	ARDLGPR	1099
212	G	209	215	RDLGPRI	1071
213	P	210	216	DLGPRIF	1021
214	R	211	217	LGPRIFT	0.95
215	I	212	218	GPRIFTA	0.96
216	F	213	219	PRIFTAM	0.823
217	T	214	220	RIFTAMA	0.7
218	A	215	221	IFTAMAG	0.787
219	M	216	222	FTAMAGW	0.857
220	A	217	223	TAMAGWG	0.994
221	G	218	224	AMAGWGT	0.994
222	W	219	225	MAGWGTE	1006
223	G	220	226	AGWGTEV	0.991
224	T	221	227	GWGTEVF	0.983
225	E	222	228	WGTEVFS	0.964
226	V	223	229	GTEVFSF	0.913
227	F	224	230	TEVFSFR	0.826
228	S	225	231	EVFSFRD	0.897
229	F	226	232	VFSFRDY	0.954
230	R	227	233	FSFRDYN	1106
231	D	228	234	SFRDYNW	1157
232	Y	229	235	FRDYNWF	1039
233	N	230	236	RDYNWFW	1.09
234	W	231	237	DYNWFWV	1026
235	F	232	238	YNWFWVP	1034
236	W	233	239	NWFWVPV	0.943
237	V	234	240	WFWVPVV	0.791
238	P	235	241	FWVPVVA	0.749
239	V	236	242	WVPVVAP	0.88
240	V	237	243	VPVVAPH	0.879
241	A	238	244	PVVAPHI	0.874
242	P	239	245	VVAPHIG	0.88
243	H	240	246	VAPHIGA	0.903
244	I	241	247	APHIGAI	0.899
245	G	242	248	PHIGAIV	0.876
246	A	243	249	HIGAIVG	0.881
247	I	244	250	IGAIVGT	0.883
248	V	245	251	GAIVGTW	0.953
249	G	246	252	AIVGTWL	0.814
250	T	247	253	IVGTWLY	0.883
251	W	248	254	VGTWLYR	0.951
252	L	249	255	GTWLYRL	0.964
253	Y	250	256	TWLYRLL	0.826
254	R	251	257	WLYRLLV	0.76
255	L	252	258	LYRLLVG	0.846
256	L	253	259	YRLLVGL	0.846
257	V	254	260	RLLVGLH	0.819
258	G	255	261	LLVGLHW	0.82
259	L	256	262	LVGLHWP	0.953
260	H	257	263	VGLHWPQ	1009
261	W	258	264	GLHWPQD	1146
262	P	259	265	LHWPQDS	1127
263	Q	260	266	HWPQDSY	1206
264	D	261	267	WPQDSYD	1279
265	S	262	268	PQDSYDM	1227
266	Y	263	269	QDSYDME	1116
267	D	264	270	DSYDMEQ	1116
268	M	265	271	SYDMEQR	1043
269	E	266	272	YDMEQRN	1061
270	Q	267	273	DMEQRNR	1034
271	R	268	274	MEQRNRA	0.92
272	N	269	275	EQRNRAK	0.979
273	R	270	276	QRNRAKD	1081
274	A	271	277	RNRAKDE	1047
275	K	272	278	NRAKDEY	1074
276	D	273	279	RAKDEYM	0.937
277	E	274	280	AKDEYMP	1019
278	Y	275	281	KDEYMPI	0.991
279	M	276	282	DEYMPIG	1.07
280	P	277	283	EYMPIGG	1084
281	I	278	284	YMPIGGY	1141
282	G	279	285	MPIGGYD	1187
283	G	280	286	PIGGYDA	1196
284	Y	281	287	IGGYDAA	1073
285	D	282	288	GGYDAAP	1223
286	A	283	289	GYDAAPK	1144
287	A	284	290	YDAAPKE	1027
288	P	285	291	DAAPKEQ	1004
289	K	286	292	AAPKEQQ	0.936
290	E	287	293	APKEQQS	1046
291	Q	288	294	PKEQQSA	1046
292	Q	289	295	KEQQSAS	1033
293	S	290	296	EQQSASS	1093
294	A	291	297	QQSASSP	1204
295	S	292	298	QSASSPN	1287
296	S	293	299	SASSPNE	1253
297	P	294	300	ASSPNEK	1193
298	N	295	301	SSPNEKQ	1239
299	E	296	302	SPNEKQS	1239
300	K	297	303	PNEKQSK	1179
301	Q	298	304	NEKQSKV	1033

## Sheet: Karplus (flex.)
Position	Residue	Start	End	Peptide	Score
4	D	1	7	MILDKVK	1012
5	K	2	8	ILDKVKI	1028
6	V	3	9	LDKVKIK	1036
7	K	4	10	DKVKIKS	1.04
8	I	5	11	KVKIKSL	1033
9	K	6	12	VKIKSLA	1024
10	S	7	13	KIKSLAL	1008
11	L	8	14	IKSLALR	0.986
12	A	9	15	KSLALRE	0.979
13	L	10	16	SLALRET	0.988
14	R	11	17	LALRETF	1002
15	E	12	18	ALRETFA	1012
16	T	13	19	LRETFAE	1004
17	F	14	20	RETFAEL	0.98
18	A	15	21	ETFAELL	0.962
19	E	16	22	TFAELLG	0.956
20	L	17	23	FAELLGT	0.967
21	L	18	24	AELLGTY	0.981
22	G	19	25	ELLGTYV	0.989
23	T	20	26	LLGTYVL	0.984
24	Y	21	27	LGTYVLV	0.963
25	V	22	28	GTYVLVL	0.944
26	L	23	29	TYVLVLF	0.927
27	V	24	30	YVLVLFG	0.925
28	L	25	31	VLVLFGT	0.942
29	F	26	32	LVLFGTG	0.967
30	G	27	33	VLFGTGV	0.993
31	T	28	34	LFGTGVL	1004
32	G	29	35	FGTGVLA	0.994
33	V	30	36	GTGVLAA	0.966
34	L	31	37	TGVLAAL	0.94
35	A	32	38	GVLAALK	0.93
36	A	33	39	VLAALKF	0.934
37	L	34	40	LAALKFD	0.959
38	K	35	41	AALKFDR	0.986
39	F	36	42	ALKFDRA	1004
40	D	37	43	LKFDRAG	1027
41	R	38	44	KFDRAGN	1032
42	A	39	45	FDRAGNI	1031
43	G	40	46	DRAGNIG	1024
44	N	41	47	RAGNIGY	1003
45	I	42	48	AGNIGYA	0.979
46	G	43	49	GNIGYAA	0.955
47	Y	44	50	NIGYAAG	0.937
48	A	45	51	IGYAAGF	0.925
49	A	46	52	GYAAGFW	0.922
50	G	47	53	YAAGFWG	0.921
51	F	48	54	AAGFWGW	0.92
52	W	49	55	AGFWGWG	0.921
53	G	50	56	GFWGWGL	0.923
54	W	51	57	FWGWGLA	0.925
55	G	52	58	WGWGLAL	0.929
56	L	53	59	GWGLALG	0.932
57	A	54	60	WGLALGM	0.931
58	L	55	61	GLALGMG	0.934
59	G	56	62	LALGMGV	0.933
60	M	57	63	ALGMGVL	0.932
61	G	58	64	LGMGVLV	0.931
62	V	59	65	GMGVLVS	0.935
63	L	60	66	MGVLVSG	0.955
64	V	61	67	GVLVSGG	0.982
65	S	62	68	VLVSGGA	1018
66	G	63	69	LVSGGAS	1046
67	G	64	70	VSGGASG	1055
68	A	65	71	SGGASGA	1.05
69	S	66	72	GGASGAH	1028
70	G	67	73	GASGAHL	1001
71	A	68	74	ASGAHLN	0.979
72	H	69	75	SGAHLNP	0.969
73	L	70	76	GAHLNPS	0.977
74	N	71	77	AHLNPSI	0.994
75	P	72	78	HLNPSIT	1008
76	S	73	79	LNPSITV	1008
77	I	74	80	NPSITVA	0.988
78	T	75	81	PSITVAL	0.961
79	V	76	82	SITVALA	0.939
80	A	77	83	ITVALAT	0.925
81	L	78	84	TVALATI	0.929
82	A	79	85	VALATIG	0.944
83	T	80	86	ALATIGK	0.968
84	I	81	87	LATIGKC	0.992
85	G	82	88	ATIGKCQ	1002
86	K	83	89	TIGKCQW	0.998
87	C	84	90	IGKCQWR	0.982
88	Q	85	91	GKCQWRK	0.971
89	W	86	92	KCQWRKV	0.974
90	R	87	93	CQWRKVP	0.985
91	K	88	94	QWRKVPH	0.994
92	V	89	95	WRKVPHY	0.981
93	P	90	96	RKVPHYL	0.957
94	H	91	97	KVPHYLV	0.932
95	Y	92	98	VPHYLVA	0.912
96	L	93	99	PHYLVAQ	0.909
97	V	94	100	HYLVAQY	0.911
98	A	95	101	YLVAQYL	0.917
99	Q	96	102	LVAQYLG	0.922
100	Y	97	103	VAQYLGA	0.928
101	L	98	104	AQYLGAF	0.933
102	G	99	105	QYLGAFL	0.934
103	A	100	106	YLGAFLG	0.937
104	F	101	107	LGAFLGA	0.936
105	L	102	108	GAFLGAA	0.935
106	G	103	109	AFLGAAV	0.93
107	A	104	110	FLGAAVL	0.926
108	A	105	111	LGAAVLF	0.919
109	V	106	112	GAAVLFL	0.918
110	L	107	113	AAVLFLT	0.922
111	F	108	114	AVLFLTY	0.928
112	L	109	115	VLFLTYK	0.947
113	T	110	116	LFLTYKG	0.966
114	Y	111	117	FLTYKGA	0.985
115	K	112	118	LTYKGAF	0.998
116	G	113	119	TYKGAFD	1001
117	A	114	120	YKGAFDN	0.997
118	F	115	121	KGAFDNY	0.993
119	D	116	122	GAFDNYD	1003
120	N	117	123	AFDNYDG	1016
121	Y	118	124	FDNYDGG	1034
122	D	119	125	DNYDGGF	1049
123	G	120	126	NYDGGFR	1041
124	G	121	127	YDGGFRA	1023
125	F	122	128	DGGFRAT	1003
126	R	123	129	GGFRATT	0.995
127	A	124	130	GFRATTG	1007
128	T	125	131	FRATTGV	1022
129	T	126	132	RATTGVN	1033
130	G	127	133	ATTGVNG	1039
131	V	128	134	TTGVNGT	1038
132	N	129	135	TGVNGTA	1043
133	G	130	136	GVNGTAD	1047
134	T	131	137	VNGTADV	1034
135	A	132	138	NGTADVF	1011
136	D	133	139	GTADVFA	0.978
137	V	134	140	TADVFAS	0.95
138	F	135	141	ADVFASY	0.937
139	A	136	142	DVFASYP	0.943
140	S	137	143	VFASYPR	0.961
141	Y	138	144	FASYPRD	0.99
142	P	139	145	ASYPRDF	1014
143	R	140	146	SYPRDFV	1017
144	D	141	147	YPRDFVG	1015
145	F	142	148	PRDFVGT	1001
146	V	143	149	RDFVGTG	1005
147	G	144	150	DFVGTGN	1023
148	T	145	151	FVGTGNC	1031
149	G	146	152	VGTGNCF	1.03
150	N	147	153	GTGNCFL	1004
151	C	148	154	TGNCFLD	0.978
152	F	149	155	GNCFLDQ	0.971
153	L	150	156	NCFLDQV	0.975
154	D	151	157	CFLDQVV	0.988
155	Q	152	158	FLDQVVG	0.993
156	V	153	159	LDQVVGT	0.992
157	V	154	160	DQVVGTG	0.997
158	G	155	161	QVVGTGL	1006
159	T	156	162	VVGTGLF	1.01
160	G	157	163	VGTGLFV	1001
161	L	158	164	GTGLFVM	0.971
162	F	159	165	TGLFVMC	0.935
163	V	160	166	GLFVMCI	0.906
164	M	161	167	LFVMCIV	0.886
165	C	162	168	FVMCIVA	0.887
166	I	163	169	VMCIVAI	0.887
167	V	164	170	MCIVAIT	0.902
168	A	165	171	CIVAITD	0.924
169	I	166	172	IVAITDN	0.948
170	T	167	173	VAITDNH	0.979
171	D	168	174	AITDNHN	0.992
172	N	169	175	ITDNHNM	0.987
173	H	170	176	TDNHNMA	0.967
174	N	171	177	DNHNMAV	0.938
175	M	172	178	NHNMAVP	0.926
176	A	173	179	HNMAVPQ	0.945
177	V	174	180	NMAVPQG	0.979
178	P	175	181	MAVPQGL	1.02
179	Q	176	182	AVPQGLQ	1047
180	G	177	183	VPQGLQP	1.05
181	L	178	184	PQGLQPL	1039
182	Q	179	185	QGLQPLL	1022
183	P	180	186	GLQPLLI	1001
184	L	181	187	LQPLLIG	0.975
185	L	182	188	QPLLIGL	0.953
186	I	183	189	PLLIGLS	0.935
187	G	184	190	LLIGLSL	0.93
188	L	185	191	LIGLSLA	0.936
189	S	186	192	IGLSLAT	0.947
190	L	187	193	GLSLATT	0.966
191	A	188	194	LSLATTA	0.98
192	T	189	195	SLATTAL	0.991
193	T	190	196	LATTALC	0.988
194	A	191	197	ATTALCF	0.969
195	L	192	198	TTALCFG	0.95
196	C	193	199	TALCFGY	0.934
197	F	194	200	ALCFGYN	0.927
198	G	195	201	LCFGYNC	0.931
199	Y	196	202	CFGYNCG	0.937
200	N	197	203	FGYNCGA	0.946
201	C	198	204	GYNCGAP	0.954
202	G	199	205	YNCGAPL	0.959
203	A	200	206	NCGAPLN	0.97
204	P	201	207	CGAPLNP	0.978
205	L	202	208	GAPLNPA	0.994
206	N	203	209	APLNPAR	1012
207	P	204	210	PLNPARD	1031
208	A	205	211	LNPARDL	1039
209	R	206	212	NPARDLG	1041
210	D	207	213	PARDLGP	1.04
211	L	208	214	ARDLGPR	1031
212	G	209	215	RDLGPRI	1024
213	P	210	216	DLGPRIF	1009
214	R	211	217	LGPRIFT	0.985
215	I	212	218	GPRIFTA	0.96
216	F	213	219	PRIFTAM	0.933
217	T	214	220	RIFTAMA	0.917
218	A	215	221	IFTAMAG	0.908
219	M	216	222	FTAMAGW	0.903
220	A	217	223	TAMAGWG	0.918
221	G	218	224	AMAGWGT	0.939
222	W	219	225	MAGWGTE	0.967
223	G	220	226	AGWGTEV	0.997
224	T	221	227	GWGTEVF	1004
225	E	222	228	WGTEVFS	0.994
226	V	223	229	GTEVFSF	0.97
227	F	224	230	TEVFSFR	0.952
228	S	225	231	EVFSFRD	0.953
229	F	226	232	VFSFRDY	0.966
230	R	227	233	FSFRDYN	0.986
231	D	228	234	SFRDYNW	0.993
232	Y	229	235	FRDYNWF	0.977
233	N	230	236	RDYNWFW	0.949
234	W	231	237	DYNWFWV	0.922
235	F	232	238	YNWFWVP	0.901
236	W	233	239	NWFWVPV	0.893
237	V	234	240	WFWVPVV	0.902
238	P	235	241	FWVPVVA	0.911
239	V	236	242	WVPVVAP	0.92
240	V	237	243	VPVVAPH	0.93
241	A	238	244	PVVAPHI	0.931
242	P	239	245	VVAPHIG	0.93
243	H	240	246	VAPHIGA	0.93
244	I	241	247	APHIGAI	0.923
245	G	242	248	PHIGAIV	0.92
246	A	243	249	HIGAIVG	0.925
247	I	244	250	IGAIVGT	0.936
248	V	245	251	GAIVGTW	0.955
249	G	246	252	AIVGTWL	0.972
250	T	247	253	IVGTWLY	0.974
251	W	248	254	VGTWLYR	0.96
252	L	249	255	GTWLYRL	0.946
253	Y	250	256	TWLYRLL	0.932
254	R	251	257	WLYRLLV	0.925
255	L	252	258	LYRLLVG	0.929
256	L	253	259	YRLLVGL	0.93
257	V	254	260	RLLVGLH	0.93
258	G	255	261	LLVGLHW	0.929
259	L	256	262	LVGLHWP	0.937
260	H	257	263	VGLHWPQ	0.957
261	W	258	264	GLHWPQD	0.988
262	P	259	265	LHWPQDS	1028
263	Q	260	266	HWPQDSY	1.05
264	D	261	267	WPQDSYD	1044
265	S	262	268	PQDSYDM	1025
266	Y	263	269	QDSYDME	0.997
267	D	264	270	DSYDMEQ	0.989
268	M	265	271	SYDMEQR	1002
269	E	266	272	YDMEQRN	1031
270	Q	267	273	DMEQRNR	1061
271	R	268	274	MEQRNRA	1.07
272	N	269	275	EQRNRAK	1075
273	R	270	276	QRNRAKD	1064
274	A	271	277	RNRAKDE	1054
275	K	272	278	NRAKDEY	1045
276	D	273	279	RAKDEYM	1.02
277	E	274	280	AKDEYMP	0.993
278	Y	275	281	KDEYMPI	0.964
279	M	276	282	DEYMPIG	0.949
280	P	277	283	EYMPIGG	0.959
281	I	278	284	YMPIGGY	0.977
282	G	279	285	MPIGGYD	0.993
283	G	280	286	PIGGYDA	0.995
284	Y	281	287	IGGYDAA	0.981
285	D	282	288	GGYDAAP	0.972
286	A	283	289	GYDAAPK	0.978
287	A	284	290	YDAAPKE	0.999
288	P	285	291	DAAPKEQ	1.04
289	K	286	292	AAPKEQQ	1078
290	E	287	293	APKEQQS	1103
291	Q	288	294	PKEQQSA	1115
292	Q	289	295	KEQQSAS	1107
293	S	290	296	EQQSASS	1094
294	A	291	297	QQSASSP	1084
295	S	292	298	QSASSPN	1082
296	S	293	299	SASSPNE	1.09
297	P	294	300	ASSPNEK	1093
298	N	295	301	SSPNEKQ	1103
299	E	296	302	SPNEKQS	1112
300	K	297	303	PNEKQSK	1116

## Sheet: Parker (hidroph.)
Position	Residue	Start	End	Peptide	Score
4	D	1	7	MILDKVK	-0.529
5	K	2	8	ILDKVKI	-1071
6	V	3	9	LDKVKIK	0.886
7	K	4	10	DKVKIKS	3129
8	I	5	11	KVKIKSL	0.386
9	K	6	12	VKIKSLA	-0.129
10	S	7	13	KIKSLAL	-0.914
11	L	8	14	IKSLALR	-1129
12	A	9	15	KSLALRE	1129
13	L	10	16	SLALRET	1057
14	R	11	17	LALRETF	-1186
15	E	12	18	ALRETFA	0.429
16	T	13	19	LRETFAE	1243
17	F	14	20	RETFAEL	1243
18	A	15	21	ETFAELL	-0.671
19	E	16	22	TFAELLG	-0.971
20	L	17	23	FAELLGT	-0.971
21	L	18	24	AELLGTY	0.071
22	G	19	25	ELLGTYV	-0.757
23	T	20	26	LLGTYVL	-3186
24	Y	21	27	LGTYVLV	-2.4
25	V	22	28	GTYVLVL	-2.4
26	L	23	29	TYVLVLF	-4529
27	V	24	30	YVLVLFG	-4457
28	L	25	31	VLVLFGT	-3443
29	F	26	32	LVLFGTG	-2.1
30	G	27	33	VLFGTGV	-1314
31	T	28	34	LFGTGVL	-2.1
32	G	29	35	FGTGVLA	-0.486
33	V	30	36	GTGVLAA	1129
34	L	31	37	TGVLAAL	-1.0
35	A	32	38	GVLAALK	-0.929
36	A	33	39	VLAALKF	-3057
37	L	34	40	LAALKFD	-1.1
38	K	35	41	AALKFDR	0.814
39	F	36	42	ALKFDRA	0.814
40	D	37	43	LKFDRAG	1329
41	R	38	44	KFDRAGN	3643
42	A	39	45	FDRAGNI	1686
43	G	40	46	DRAGNIG	3814
44	N	41	47	RAGNIGY	2114
45	I	42	48	AGNIGYA	1814
46	G	43	49	GNIGYAA	1814
47	Y	44	50	NIGYAAG	1814
48	A	45	51	IGYAAGF	-0.5
49	A	46	52	GYAAGFW	-0.786
50	G	47	53	YAAGFWG	-0.786
51	F	48	54	AAGFWGW	-1943
52	W	49	55	AGFWGWG	-1429
53	G	50	56	GFWGWGL	-3043
54	W	51	57	FWGWGLA	-3557
55	G	52	58	WGWGLAL	-3557
56	L	53	59	GWGLALG	-1314
57	A	54	60	WGLALGM	-2729
58	L	55	61	GLALGMG	-0.486
59	G	56	62	LALGMGV	-1829
60	M	57	63	ALGMGVL	-1829
61	G	58	64	LGMGVLV	-2657
62	V	59	65	GMGVLVS	-0.414
63	L	60	66	MGVLVSG	-0.414
64	V	61	67	GVLVSGG	1.0
65	S	62	68	VLVSGGA	0.486
66	G	63	69	LVSGGAS	1943
67	G	64	70	VSGGASG	4071
68	A	65	71	SGGASGA	4.9
69	S	66	72	GGASGAH	4271
70	G	67	73	GASGAHL	2143
71	A	68	74	ASGAHLN	2329
72	H	69	75	SGAHLNP	2329
73	L	70	76	GAHLNPS	2329
74	N	71	77	AHLNPSI	0.371
75	P	72	78	HLNPSIT	0.814
76	S	73	79	LNPSITV	-0.014
77	I	74	80	NPSITVA	1.6
78	T	75	81	PSITVAL	-0.714
79	V	76	82	SITVALA	-0.714
80	A	77	83	ITVALAT	-0.9
81	L	78	84	TVALATI	-0.9
82	A	79	85	VALATIG	-0.829
83	T	80	86	ALATIGK	0.514
84	I	81	87	LATIGKC	0.414
85	G	82	88	ATIGKCQ	2586
86	K	83	89	TIGKCQW	0.857
87	C	84	90	IGKCQWR	0.714
88	Q	85	91	GKCQWRK	2671
89	W	86	92	KCQWRKV	1329
90	R	87	93	CQWRKVP	0.814
91	K	88	94	QWRKVPH	0.914
92	V	89	95	WRKVPHY	-0.214
93	P	90	96	RKVPHYL	-0.1
94	H	91	97	KVPHYLV	-1229
95	Y	92	98	VPHYLVA	-1743
96	L	93	99	PHYLVAQ	-0.357
97	V	94	100	HYLVAQY	-0.929
98	A	95	101	YLVAQYL	-2543
99	Q	96	102	LVAQYLG	-1457
100	Y	97	103	VAQYLGA	0.157
101	L	98	104	AQYLGAF	-0.629
102	G	99	105	QYLGAFL	-2243
103	A	100	106	YLGAFLG	-2286
104	F	101	107	LGAFLGA	-1714
105	L	102	108	GAFLGAA	-0.1
106	G	103	109	AFLGAAV	-1443
107	A	104	110	FLGAAVL	-3057
108	A	105	111	LGAAVLF	-3057
109	V	106	112	GAAVLFL	-3057
110	L	107	113	AAVLFLT	-3129
111	F	108	114	AVLFLTY	-3.7
112	L	109	115	VLFLTYK	-3186
113	T	110	116	LFLTYKG	-1843
114	Y	111	117	FLTYKGA	-0.229
115	K	112	118	LTYKGAF	-0.229
116	G	113	119	TYKGAFD	2514
117	A	114	120	YKGAFDN	2771
118	F	115	121	KGAFDNY	2771
119	D	116	122	GAFDNYD	3386
120	N	117	123	AFDNYDG	3386
121	Y	118	124	FDNYDGG	3.9
122	D	119	125	DNYDGGF	3.9
123	G	120	126	NYDGGFR	3071
124	G	121	127	YDGGFRA	2371
125	F	122	128	DGGFRAT	3386
126	R	123	129	GGFRATT	2.7
127	A	124	130	GFRATTG	2.7
128	T	125	131	FRATTGV	1357
129	T	126	132	RATTGVN	3671
130	G	127	133	ATTGVNG	3886
131	V	128	134	TTGVNGT	4329
132	N	129	135	TGVNGTA	3886
133	G	130	136	GVNGTAD	4571
134	T	131	137	VNGTADV	3229
135	A	132	138	NGTADVF	2443
136	D	133	139	GTADVFA	1743
137	V	134	140	TADVFAS	1857
138	F	135	141	ADVFASY	0.843
139	A	136	142	DVFASYP	0.843
140	S	137	143	VFASYPR	0.014
141	Y	138	144	FASYPRD	1971
142	P	139	145	ASYPRDF	1971
143	R	140	146	SYPRDFV	1143
144	D	141	147	YPRDFVG	1029
145	F	142	148	PRDFVGT	2043
146	V	143	149	RDFVGTG	2557
147	G	144	150	DFVGTGN	2957
148	T	145	151	FVGTGNC	1729
149	G	146	152	VGTGNCF	1729
150	N	147	153	GTGNCFL	0.943
151	C	148	154	TGNCFLD	1557
152	F	149	155	GNCFLDQ	1671
153	L	150	156	NCFLDQV	0.329
154	D	151	157	CFLDQVV	-1.2
155	Q	152	158	FLDQVVG	-0.586
156	V	153	159	LDQVVGT	1471
157	V	154	160	DQVVGTG	3.6
158	G	155	161	QVVGTGL	0.857
159	T	156	162	VVGTGLF	-1314
160	G	157	163	VGTGLFV	-1314
161	L	158	164	GTGLFVM	-1386
162	F	159	165	TGLFVMC	-2.0
163	V	160	166	GLFVMCI	-3886
164	M	161	167	LFVMCIV	-5229
165	C	162	168	FVMCIVA	-3614
166	I	163	169	VMCIVAI	-3443
167	V	164	170	MCIVAIT	-2171
168	A	165	171	CIVAITD	-0.143
169	I	166	172	IVAITDN	0.657
170	T	167	173	VAITDNH	2.1
171	D	168	174	AITDNHN	3629
172	N	169	175	ITDNHNM	2729
173	H	170	176	TDNHNMA	4171
174	N	171	177	DNHNMAV	2.9
175	M	172	178	NHNMAVP	1771
176	A	173	179	HNMAVPQ	1629
177	V	174	180	NMAVPQG	2143
178	P	175	181	MAVPQGL	-0.171
179	Q	176	182	AVPQGLQ	1286
180	G	177	183	VPQGLQP	1286
181	L	178	184	PQGLQPL	0.5
182	Q	179	185	QGLQPLL	-1114
183	P	180	186	GLQPLLI	-3114
184	L	181	187	LQPLLIG	-3114
185	L	182	188	QPLLIGL	-3114
186	I	183	189	PLLIGLS	-3043
187	G	184	190	LLIGLSL	-4657
188	L	185	191	LIGLSLA	-3043
189	S	186	192	IGLSLAT	-0.986
190	L	187	193	GLSLATT	0.9
191	A	188	194	LSLATTA	0.386
192	T	189	195	SLATTAL	0.386
193	T	190	196	LATTALC	-0.343
194	A	191	197	ATTALCF	-0.343
195	L	192	198	TTALCFG	0.171
196	C	193	199	TALCFGY	-0.843
197	F	194	200	ALCFGYN	-0.586
198	G	195	201	LCFGYNC	-0.686
199	Y	196	202	CFGYNCG	1443
200	N	197	203	FGYNCGA	1543
201	C	198	204	GYNCGAP	3157
202	G	199	205	YNCGAPL	1029
203	A	200	206	NCGAPLN	2.3
204	P	201	207	CGAPLNP	1.6
205	L	202	208	GAPLNPA	1.7
206	N	203	209	APLNPAR	1486
207	P	204	210	PLNPARD	2614
208	A	205	211	LNPARDL	1.0
209	R	206	212	NPARDLG	3129
210	D	207	213	PARDLGP	2429
211	L	208	214	ARDLGPR	2729
212	G	209	215	RDLGPRI	1286
213	P	210	216	DLGPRIF	-0.629
214	R	211	217	LGPRIFT	-1314
215	I	212	218	GPRIFTA	0.3
216	F	213	219	PRIFTAM	-1114
217	T	214	220	RIFTAMA	-1114
218	A	215	221	IFTAMAG	-0.9
219	M	216	222	FTAMAGW	-1186
220	A	217	223	TAMAGWG	0.943
221	G	218	224	AMAGWGT	0.943
222	W	219	225	MAGWGTE	1757
223	G	220	226	AGWGTEV	1829
224	T	221	227	GWGTEVF	0.214
225	E	222	228	WGTEVFS	0.329
226	V	223	229	GTEVFSF	0.443
227	F	224	230	TEVFSFR	0.229
228	S	225	231	EVFSFRD	0.914
229	F	226	232	VFSFRDY	-0.471
230	R	227	233	FSFRDYN	1057
231	D	228	234	SFRDYNW	0.943
232	Y	229	235	FRDYNWF	-1.3
233	N	230	236	RDYNWFW	-1414
234	W	231	237	DYNWFWV	-2543
235	F	232	238	YNWFWVP	-3671
236	W	233	239	NWFWVPV	-3929
237	V	234	240	WFWVPVV	-5457
238	P	235	241	FWVPVVA	-3729
239	V	236	242	WVPVVAP	-2114
240	V	237	243	VPVVAPH	-0.386
241	A	238	244	PVVAPHI	-1.0
242	P	239	245	VVAPHIG	-0.486
243	H	240	246	VAPHIGA	0.343
244	I	241	247	APHIGAI	-0.271
245	G	242	248	PHIGAIV	-1.1
246	A	243	249	HIGAIVG	-0.586
247	I	244	250	IGAIVGT	-0.143
248	V	245	251	GAIVGTW	-0.429
249	G	246	252	AIVGTWL	-2557
250	T	247	253	IVGTWLY	-3129
251	W	248	254	VGTWLYR	-1386
252	L	249	255	GTWLYRL	-2171
253	Y	250	256	TWLYRLL	-4.3
254	R	251	257	WLYRLLV	-5571
255	L	252	258	LYRLLVG	-3329
256	L	253	259	YRLLVGL	-3329
257	V	254	260	RLLVGLH	-2757
258	G	255	261	LLVGLHW	-4786
259	L	256	262	LVGLHWP	-3171
260	H	257	263	VGLHWPQ	-1.0
261	W	258	264	GLHWPQD	0.957
262	P	259	265	LHWPQDS	1071
263	Q	260	266	HWPQDSY	2114
264	D	261	267	WPQDSYD	3243
265	S	262	268	PQDSYDM	4071
266	Y	263	269	QDSYDME	4886
267	D	264	270	DSYDMEQ	4886
268	M	265	271	SYDMEQR	4057
269	E	266	272	YDMEQRN	4129
270	Q	267	273	DMEQRNR	5.0
271	R	268	274	MEQRNRA	3871
272	N	269	275	EQRNRAK	5286
273	R	270	276	QRNRAKD	5.6
274	A	271	277	RNRAKDE	5857
275	K	272	278	NRAKDEY	4986
276	D	273	279	RAKDEYM	3386
277	E	274	280	AKDEYMP	3086
278	Y	275	281	KDEYMPI	1643
279	M	276	282	DEYMPIG	1643
280	P	277	283	EYMPIGG	1029
281	I	278	284	YMPIGGY	-0.357
282	G	279	285	MPIGGYD	1343
283	G	280	286	PIGGYDA	2243
284	Y	281	287	IGGYDAA	2243
285	D	282	288	GGYDAAP	3686
286	A	283	289	GYDAAPK	3686
287	A	284	290	YDAAPKE	3986
288	P	285	291	DAAPKEQ	5114
289	K	286	292	AAPKEQQ	4543
290	E	287	293	APKEQQS	5171
291	Q	288	294	PKEQQSA	5171
292	Q	289	295	KEQQSAS	5.8
293	S	290	296	EQQSASS	5914
294	A	291	297	QQSASSP	5.1
295	S	292	298	QSASSPN	5243
296	S	293	299	SASSPNE	5.5
297	P	294	300	ASSPNEK	5386
298	N	295	301	SSPNEKQ	5943
299	E	296	302	SPNEKQS	5943
300	K	297	303	PNEKQSK	5829
301	Q	298	304	NEKQSKV	5.0

## Sheet: Kolaskar (antig.)
Position	Residue	Start	End	Peptide	Score
4	D	1	7	MILDKVK	1048
5	K	2	8	ILDKVKI	1095
6	V	3	9	LDKVKIK	1063
7	K	4	10	DKVKIKS	1029
8	I	5	11	KVKIKSL	1084
9	K	6	12	VKIKSLA	1103
10	S	7	13	KIKSLAL	1084
11	L	8	14	IKSLALR	1076
12	A	9	15	KSLALRE	1033
13	L	10	16	SLALRET	1.03
14	R	11	17	LALRETF	1041
15	E	12	18	ALRETFA	1015
16	T	13	19	LRETFAE	0.984
17	F	14	20	RETFAEL	0.984
18	A	15	21	ETFAELL	1038
19	E	16	22	TFAELLG	1041
20	L	17	23	FAELLGT	1041
21	L	18	24	AELLGTY	1051
22	G	19	25	ELLGTYV	1097
23	T	20	26	LLGTYVL	1154
24	Y	21	27	LGTYVLV	1173
25	V	22	28	GTYVLVL	1173
26	L	23	29	TYVLVLF	1204
27	V	24	30	YVLVLFG	1199
28	L	25	31	VLVLFGT	1163
29	F	26	32	LVLFGTG	1.09
30	G	27	33	VLFGTGV	1109
31	T	28	34	LFGTGVL	1.09
32	G	29	35	FGTGVLA	1064
33	V	30	36	GTGVLAA	1.06
34	L	31	37	TGVLAAL	1113
35	A	32	38	GVLAALK	1116
36	A	33	39	VLAALKF	1147
37	L	34	40	LAALKFD	1074
38	K	35	41	AALKFDR	1.02
39	F	36	42	ALKFDRA	1.02
40	D	37	43	LKFDRAG	0.993
41	R	38	44	KFDRAGN	0.925
42	A	39	45	FDRAGNI	0.957
43	G	40	46	DRAGNIG	0.926
44	N	41	47	RAGNIGY	0.968
45	I	42	48	AGNIGYA	0.995
46	G	43	49	GNIGYAA	0.995
47	Y	44	50	NIGYAAG	0.995
48	A	45	51	IGYAAGF	1.04
49	A	46	52	GYAAGFW	1003
50	G	47	53	YAAGFWG	1003
51	F	48	54	AAGFWGW	0.965
52	W	49	55	AGFWGWG	0.938
53	G	50	56	GFWGWGL	0.964
54	W	51	57	FWGWGLA	0.991
55	G	52	58	WGWGLAL	1014
56	L	53	59	GWGLALG	1011
57	A	54	60	WGLALGM	1004
58	L	55	61	GLALGMG	1002
59	G	56	62	LALGMGV	1074
60	M	57	63	ALGMGVL	1074
61	G	58	64	LGMGVLV	1.12
62	V	59	65	GMGVLVS	1086
63	L	60	66	MGVLVSG	1086
64	V	61	67	GVLVSGG	1093
65	S	62	68	VLVSGGA	1.12
66	G	63	69	LVSGGAS	1067
67	G	64	70	VSGGASG	1013
68	A	65	71	SGGASGA	0.968
69	S	66	72	GGASGAH	0.981
70	G	67	73	GASGAHL	1035
71	A	68	74	ASGAHLN	1021
72	H	69	75	SGAHLNP	1021
73	L	70	76	GAHLNPS	1021
74	N	71	77	AHLNPSI	1.06
75	P	72	78	HLNPSIT	1038
76	S	73	79	LNPSITV	1078
77	I	74	80	NPSITVA	1051
78	T	75	81	PSITVAL	1119
79	V	76	82	SITVALA	1119
80	A	77	83	ITVALAT	1104
81	L	78	84	TVALATI	1104
82	A	79	85	VALATIG	1099
83	T	80	86	ALATIGK	1035
84	I	81	87	LATIGKC	1084
85	G	82	88	ATIGKCQ	1051
86	K	83	89	TIGKCQW	1026
87	C	84	90	IGKCQWR	1021
88	Q	85	91	GKCQWRK	0.99
89	W	86	92	KCQWRKV	1062
90	R	87	93	CQWRKVP	1081
91	K	88	94	QWRKVPH	1038
92	V	89	95	WRKVPHY	1058
93	P	90	96	RKVPHYL	1109
94	H	91	97	KVPHYLV	1182
95	Y	92	98	VPHYLVA	1201
96	L	93	99	PHYLVAQ	1149
97	V	94	100	HYLVAQY	1163
98	A	95	101	YLVAQYL	1183
99	Q	96	102	LVAQYLG	1142
100	Y	97	103	VAQYLGA	1116
101	L	98	104	AQYLGAF	1074
102	G	99	105	QYLGAFL	1101
103	A	100	106	YLGAFLG	1081
104	F	101	107	LGAFLGA	1067
105	L	102	108	GAFLGAA	1.04
106	G	103	109	AFLGAAV	1113
107	A	104	110	FLGAAVL	1139
108	A	105	111	LGAAVLF	1139
109	V	106	112	GAAVLFL	1139
110	L	107	113	AAVLFLT	1144
111	F	108	114	AVLFLTY	1158
112	L	109	115	VLFLTYK	1139
113	T	110	116	LFLTYKG	1066
114	Y	111	117	FLTYKGA	1.04
115	K	112	118	LTYKGAF	1.04
116	G	113	119	TYKGAFD	0.985
117	A	114	120	YKGAFDN	0.966
118	F	115	121	KGAFDNY	0.966
119	D	116	122	GAFDNYD	0.957
120	N	117	123	AFDNYDG	0.957
121	Y	118	124	FDNYDGG	0.93
122	D	119	125	DNYDGGF	0.93
123	G	120	126	NYDGGFR	0.931
124	G	121	127	YDGGFRA	0.972
125	F	122	128	DGGFRAT	0.936
126	R	123	129	GGFRATT	0.942
127	A	124	130	GFRATTG	0.942
128	T	125	131	FRATTGV	1015
129	T	126	132	RATTGVN	0.97
130	G	127	133	ATTGVNG	0.97
131	V	128	134	TTGVNGT	0.948
132	N	129	135	TGVNGTA	0.97
133	G	130	136	GVNGTAD	0.964
134	T	131	137	VNGTADV	1036
135	A	132	138	NGTADVF	0.995
136	D	133	139	GTADVFA	1036
137	V	134	140	TADVFAS	1056
138	F	135	141	ADVFASY	1092
139	A	136	142	DVFASYP	1092
140	S	137	143	VFASYPR	1093
141	Y	138	144	FASYPRD	1019
142	P	139	145	ASYPRDF	1019
143	R	140	146	SYPRDFV	1064
144	D	141	147	YPRDFVG	1045
145	F	142	148	PRDFVGT	1009
146	V	143	149	RDFVGTG	0.981
147	G	144	150	DFVGTGN	0.968
148	T	145	151	FVGTGNC	1046
149	G	146	152	VGTGNCF	1046
150	N	147	153	GTGNCFL	1027
151	C	148	154	TGNCFLD	1025
152	F	149	155	GNCFLDQ	1041
153	L	150	156	NCFLDQV	1113
154	D	151	157	CFLDQVV	1.2
155	Q	152	158	FLDQVVG	1123
156	V	153	159	LDQVVGT	1097
157	V	154	160	DQVVGTG	1043
158	G	155	161	QVVGTGL	1098
159	T	156	162	VVGTGLF	1109
160	G	157	163	VGTGLFV	1109
161	L	158	164	GTGLFVM	1.03
162	F	159	165	TGLFVMC	1106
163	V	160	166	GLFVMCI	1141
164	M	161	167	LFVMCIV	1214
165	C	162	168	FVMCIVA	1187
166	I	163	169	VMCIVAI	1196
167	V	164	170	MCIVAIT	1128
168	A	165	171	CIVAITD	1134
169	I	166	172	IVAITDN	1043
170	T	167	173	VAITDNH	1036
171	D	168	174	AITDNHN	0.95
172	N	169	175	ITDNHNM	0.916
173	H	170	176	TDNHNMA	0.903
174	N	171	177	DNHNMAV	0.971
175	M	172	178	NHNMAVP	0.999
176	A	173	179	HNMAVPQ	1033
177	V	174	180	NMAVPQG	1.0
178	P	175	181	MAVPQGL	1068
179	Q	176	182	AVPQGLQ	1095
180	G	177	183	VPQGLQP	1095
181	L	178	184	PQGLQPL	1076
182	Q	179	185	QGLQPLL	1103
183	P	180	186	GLQPLLI	1122
184	L	181	187	LQPLLIG	1122
185	L	182	188	QPLLIGL	1122
186	I	183	189	PLLIGLS	1122
187	G	184	190	LLIGLSL	1148
188	L	185	191	LIGLSLA	1122
189	S	186	192	IGLSLAT	1073
190	L	187	193	GLSLATT	1038
191	A	188	194	LSLATTA	1065
192	T	189	195	SLATTAL	1065
193	T	190	196	LATTALC	1123
194	A	191	197	ATTALCF	1.1
195	L	192	198	TTALCFG	1073
196	C	193	199	TALCFGY	1109
197	F	194	200	ALCFGYN	1.09
198	G	195	201	LCFGYNC	1139
199	Y	196	202	CFGYNCG	1086
200	N	197	203	FGYNCGA	1036
201	C	198	204	GYNCGAP	1032
202	G	199	205	YNCGAPL	1086
203	A	200	206	NCGAPLN	1031
204	P	201	207	CGAPLNP	1072
205	L	202	208	GAPLNPA	1022
206	N	203	209	APLNPAR	1022
207	P	204	210	PLNPARD	0.994
208	A	205	211	LNPARDL	1.02
209	R	206	212	NPARDLG	0.967
210	D	207	213	PARDLGP	1008
211	L	208	214	ARDLGPR	0.981
212	G	209	215	RDLGPRI	0.993
213	P	210	216	DLGPRIF	1024
214	R	211	217	LGPRIFT	1.03
215	I	212	218	GPRIFTA	1004
216	F	213	219	PRIFTAM	0.997
217	T	214	220	RIFTAMA	0.997
218	A	215	221	IFTAMAG	0.997
219	M	216	222	FTAMAGW	0.96
220	A	217	223	TAMAGWG	0.929
221	G	218	224	AMAGWGT	0.929
222	W	219	225	MAGWGTE	0.899
223	G	220	226	AGWGTEV	0.978
224	T	221	227	GWGTEVF	0.982
225	E	222	228	WGTEVFS	1002
226	V	223	229	GTEVFSF	1.03
227	F	224	230	TEVFSFR	1.03
228	S	225	231	EVFSFRD	1024
229	F	226	232	VFSFRDY	1068
230	R	227	233	FSFRDYN	0.981
231	D	228	234	SFRDYNW	0.953
232	Y	229	235	FRDYNWF	0.964
233	N	230	236	RDYNWFW	0.936
234	W	231	237	DYNWFWV	1009
235	F	232	238	YNWFWVP	1037
236	W	233	239	NWFWVPV	1069
237	V	234	240	WFWVPVV	1156
238	P	235	241	FWVPVVA	1.18
239	V	236	242	WVPVVAP	1176
240	V	237	243	VPVVAPH	1207
241	A	238	244	PVVAPHI	1174
242	P	239	245	VVAPHIG	1146
243	H	240	246	VAPHIGA	1101
244	I	241	247	APHIGAI	1068
245	G	242	248	PHIGAIV	1113
246	A	243	249	HIGAIVG	1086
247	I	244	250	IGAIVGT	1058
248	V	245	251	GAIVGTW	1021
249	G	246	252	AIVGTWL	1075
250	T	247	253	IVGTWLY	1089
251	W	248	254	VGTWLYR	1049
252	L	249	255	GTWLYRL	1.03
253	Y	250	256	TWLYRLL	1084
254	R	251	257	WLYRLLV	1151
255	L	252	258	LYRLLVG	1149
256	L	253	259	YRLLVGL	1149
257	V	254	260	RLLVGLH	1141
258	G	255	261	LLVGLHW	1144
259	L	256	262	LVGLHWP	1117
260	H	257	263	VGLHWPQ	1083
261	W	258	264	GLHWPQD	1.01
262	P	259	265	LHWPQDS	1029
263	Q	260	266	HWPQDSY	1017
264	D	261	267	WPQDSYD	0.982
265	S	262	268	PQDSYDM	0.973
266	Y	263	269	QDSYDME	0.942
267	D	264	270	DSYDMEQ	0.942
268	M	265	271	SYDMEQR	0.943
269	E	266	272	YDMEQRN	0.91
270	Q	267	273	DMEQRNR	0.869
271	R	268	274	MEQRNRA	0.897
272	N	269	275	EQRNRAK	0.912
273	R	270	276	QRNRAKD	0.914
274	A	271	277	RNRAKDE	0.89
275	K	272	278	NRAKDEY	0.932
276	D	273	279	RAKDEYM	0.939
277	E	274	280	AKDEYMP	0.966
278	Y	275	281	KDEYMPI	0.979
279	M	276	282	DEYMPIG	0.971
280	P	277	283	EYMPIGG	0.972
281	I	278	284	YMPIGGY	1016
282	G	279	285	MPIGGYD	0.974
283	G	280	286	PIGGYDA	1008
284	Y	281	287	IGGYDAA	1008
285	D	282	288	GGYDAAP	0.995
286	A	283	289	GYDAAPK	1003
287	A	284	290	YDAAPKE	1.0
288	P	285	291	DAAPKEQ	0.979
289	K	286	292	AAPKEQQ	1.0
290	E	287	293	APKEQQS	0.993
291	Q	288	294	PKEQQSA	0.993
292	Q	289	295	KEQQSAS	0.986
293	S	290	296	EQQSASS	0.997
294	A	291	297	QQSASSP	1028
295	S	292	298	QSASSPN	0.994
296	S	293	299	SASSPNE	0.97
297	P	294	300	ASSPNEK	0.958
298	N	295	301	SSPNEKQ	0.951
299	E	296	302	SPNEKQS	0.951
300	K	297	303	PNEKQSK	0.94
301	Q	298	304	NEKQSKV	0.985

## Sheet: BepiPred 2.0 Epit
Position	Residue	Score	Assignement
1	M	0.259444444444
2	I	0.323
3	L	0.387777777778
4	D	0.446222222222
5	K	0.507222222222	B
6	V	0.517555555556	B
7	K	0.539111111111	B
8	I	0.541666666667	B
9	K	0.521222222222	B
10	S	0.502222222222	B
11	L	0.484888888889
12	A	0.454333333333
13	L	0.431111111111
14	R	0.399111111111
15	E	0.379333333333
16	T	0.348555555556
17	F	0.333777777778
18	A	0.330888888889
19	E	0.314888888889
20	L	0.304444444444
21	L	0.296444444444
22	G	0.289333333333
23	T	0.285222222222
24	Y	0.278777777778
25	V	0.278888888889
26	L	0.266666666667
27	V	0.263111111111
28	L	0.264
29	F	0.252888888889
30	G	0.262222222222
31	T	0.267777777778
32	G	0.279666666667
33	V	0.293111111111
34	L	0.322
35	A	0.355888888889
36	A	0.396333333333
37	L	0.434111111111
38	K	0.479111111111
39	F	0.513666666667	B
40	D	0.546222222222	B
41	R	0.569777777778	B
42	A	0.582555555556	B
43	G	0.577333333333	B
44	N	0.560333333333	B
45	I	0.536	B
46	G	0.504111111111	B
47	Y	0.477111111111
48	A	0.455555555556
49	A	0.424111111111
50	G	0.403
51	F	0.380222222222
52	W	0.366666666667
53	G	0.356555555556
54	W	0.347111111111
55	G	0.333222222222
56	L	0.321555555556
57	A	0.303888888889
58	L	0.304222222222
59	G	0.297222222222
60	M	0.292333333333
61	G	0.284333333333
62	V	0.292555555556
63	L	0.306888888889
64	V	0.332333333333
65	S	0.348666666667
66	G	0.369888888889
67	G	0.380222222222
68	A	0.392666666667
69	S	0.404888888889
70	G	0.410333333333
71	A	0.404555555556
72	H	0.388222222222
73	L	0.361777777778
74	N	0.335777777778
75	P	0.306111111111
76	S	0.280777777778
77	I	0.263
78	T	0.246111111111
79	V	0.246777777778
80	A	0.256666666667
81	L	0.280666666667
82	A	0.318444444444
83	T	0.345666666667
84	I	0.390222222222
85	G	0.423444444444
86	K	0.463222222222
87	C	0.499111111111
88	Q	0.501222222222	B
89	W	0.501666666667	B
90	R	0.502111111111	B
91	K	0.481111111111
92	V	0.457444444444
93	P	0.420222222222
94	H	0.391888888889
95	Y	0.362222222222
96	L	0.344777777778
97	V	0.341111111111
98	A	0.324666666667
99	Q	0.296444444444
100	Y	0.289888888889
101	L	0.291666666667
102	G	0.283
103	A	0.281666666667
104	F	0.271555555556
105	L	0.257777777778
106	G	0.242
107	A	0.246777777778
108	A	0.254444444444
109	V	0.252
110	L	0.264777777778
111	F	0.301555555556
112	L	0.332222222222
113	T	0.363222222222
114	Y	0.391888888889
115	K	0.439666666667
116	G	0.471888888889
117	A	0.499111111111
118	F	0.537666666667	B
119	D	0.567222222222	B
120	N	0.574111111111	B
121	Y	0.581444444444	B
122	D	0.599444444444	B
123	G	0.594444444444	B
124	G	0.589222222222	B
125	F	0.597	B
126	R	0.601222222222	B
127	A	0.602555555556	B
128	T	0.615111111111	B
129	T	0.611777777778	B
130	G	0.599333333333	B
131	V	0.574666666667	B
132	N	0.573	B
133	G	0.556111111111	B
134	T	0.516333333333	B
135	A	0.482333333333
136	D	0.445222222222
137	V	0.411222222222
138	F	0.399
139	A	0.402222222222
140	S	0.418777777778
141	Y	0.430333333333
142	P	0.438222222222
143	R	0.449555555556
144	D	0.468777777778
145	F	0.48
146	V	0.475888888889
147	G	0.459777777778
148	T	0.440333333333
149	G	0.406777777778
150	N	0.382555555556
151	C	0.370666666667
152	F	0.361111111111
153	L	0.347888888889
154	D	0.334777777778
155	Q	0.321777777778
156	V	0.319111111111
157	V	0.323888888889
158	G	0.323555555556
159	T	0.308888888889
160	G	0.288111111111
161	L	0.266222222222
162	F	0.244
163	V	0.227555555556
164	M	0.224555555556
165	C	0.218
166	I	0.212111111111
167	V	0.229444444444
168	A	0.269888888889
169	I	0.320555555556
170	T	0.379777777778
171	D	0.437555555556
172	N	0.493888888889
173	H	0.529777777778	B
174	N	0.565666666667	B
175	M	0.604	B
176	A	0.618444444444	B
177	V	0.611555555556	B
178	P	0.599222222222	B
179	Q	0.577333333333	B
180	G	0.544111111111	B
181	L	0.506666666667	B
182	Q	0.479555555556
183	P	0.453111111111
184	L	0.409
185	L	0.380222222222
186	I	0.359111111111
187	G	0.331666666667
188	L	0.311555555556
189	S	0.299222222222
190	L	0.300666666667
191	A	0.300333333333
192	T	0.302
193	T	0.316555555556
194	A	0.313555555556
195	L	0.325444444444
196	C	0.349111111111
197	F	0.361777777778
198	G	0.387444444444
199	Y	0.398
200	N	0.404
201	C	0.412777777778
202	G	0.418666666667
203	A	0.428
204	P	0.407444444444
205	L	0.393888888889
206	N	0.389666666667
207	P	0.367888888889
208	A	0.352444444444
209	R	0.341555555556
210	D	0.332444444444
211	L	0.309111111111
212	G	0.293444444444
213	P	0.289333333333
214	R	0.282666666667
215	I	0.283222222222
216	F	0.291888888889
217	T	0.315111111111
218	A	0.341333333333
219	M	0.365555555556
220	A	0.405888888889
221	G	0.448666666667
222	W	0.486666666667
223	G	0.517555555556	B
224	T	0.547222222222	B
225	E	0.567777777778	B
226	V	0.586111111111	B
227	F	0.589666666667	B
228	S	0.588777777778	B
229	F	0.579444444444	B
230	R	0.561333333333	B
231	D	0.539222222222	B
232	Y	0.518555555556	B
233	N	0.469
234	W	0.438444444444
235	F	0.392555555556
236	W	0.361888888889
237	V	0.326888888889
238	P	0.302666666667
239	V	0.290777777778
240	V	0.284555555556
241	A	0.267111111111
242	P	0.276111111111
243	H	0.279333333333
244	I	0.280888888889
245	G	0.279777777778
246	A	0.296111111111
247	I	0.319
248	V	0.320666666667
249	G	0.325666666667
250	T	0.346888888889
251	W	0.360666666667
252	L	0.349222222222
253	Y	0.366777777778
254	R	0.393111111111
255	L	0.422222222222
256	L	0.436222222222
257	V	0.460333333333
258	G	0.487888888889
259	L	0.515333333333	B
260	H	0.541888888889	B
261	W	0.588222222222	B
262	P	0.608555555556	B
263	Q	0.613555555556	B
264	D	0.608333333333	B
265	S	0.612	B
266	Y	0.614222222222	B
267	D	0.614111111111	B
268	M	0.608222222222	B
269	E	0.605555555556	B
270	Q	0.596777777778	B
271	R	0.603	B
272	N	0.611888888889	B
273	R	0.621222222222	B
274	A	0.626555555556	B
275	K	0.643	B
276	D	0.643444444444	B
277	E	0.634777777778	B
278	Y	0.635333333333	B
279	M	0.630555555556	B
280	P	0.625333333333	B
281	I	0.625666666667	B
282	G	0.614	B
283	G	0.601444444444	B
284	Y	0.586888888889	B
285	D	0.592555555556	B
286	A	0.610222222222	B
287	A	0.626222222222	B
288	P	0.657333333333	B
289	K	0.671333333333	B
290	E	0.687333333333	B
291	Q	0.708666666667	B
292	Q	0.720555555556	B
293	S	0.724222222222	B
294	A	0.724111111111	B
295	S	0.716222222222	B
296	S	0.700111111111	B
297	P	0.684777777778	B
298	N	0.668888888889	B
299	E	0.654	B
300	K	0.632666666667	B
301	Q	0.557444444444	B
302	S	0.483555555556
303	K	0.410444444444
304	V	0.338777777778

[truncated: 10 more sheets: BepiPred 1.0, ABCpred, BcePred,  Ellipro (non-linear B), MHC I Pig, MHC I Pig list, MHC II Human, MHC II Mouse, NetChop, PCPS]
