# Supplementary material for: First Data on Ornithodoros moubata Aquaporins: Structural, Phylogenetic and Immunogenic Characterisation as Vaccine Targets
Source: Pathogens. 2022 Jun 16;11(6):694. doi: 10.3390/pathogens11060694 (PMC9227307; doi:10.3390/pathogens11060694)
Supplement: Supplementary file 1 [file pathogens-11-00694-s001.zip › Table S9.xlsx]

## Sheet: Summary
Table S9: Structural, physicochemical and epitope predictions for OmAQP97
Position	Sequence	TMHMM	Emini (accesibility)	BepiPred 2.0 (surface)	Chou & Fasman (turns)	Karplus & Scoultz (flexibility)	Parker (hydrophilicity)	Kolaskar & Tongaonkar	BepiPred 2.0 (epit)	BepiPred 1.0 (epit)	ABCpred	BcePred	Ellipro	MHC I IEDB Pig	MHC II IEDB Human	MHC II IEDB Mouse	NetChop		CEG
1	M	i		E					.	B	.	.	.	T	.	T	S	S
2	A	i		E					.	B	.	.	.	T	.	T	.	S
3	N	i	E	E					.	B	.	.	.	T	.	T	.	.
4	P	i	E	E	E	E	.	.	.	B	.	.	.	T	.	T	.	.
5	P	i	E	E	E	E	.	.	.	B	.	.	.	T	.	T	.	.
6	F	i	.	E	E	E	.	.	B	B	.	.	.	T	T	T	.	S
7	P	i	E	E	E	.	.	.	B	B	.	.	.	T	T	T	.	.
8	F	i	E	.	E	.	.	.	B	.	.	.	.	T	T	T	S	S
9	M	i	E	.	.	.	.	.	B	.	.	.	.	T	T	T	S	S
10	K	i	.	E	.	E	.	.	B	.	.	.	.	T	T	T	S	.
11	R	i	.	E	.	.	.	B	B	.	B	.	.	T	T	T	S	.
12	F	i	E	.	.	.	.	.	B	.	B	B	.	T	T	T	S	S
13	V	i	.	E	.	E	.	B	B	.	B	B	.	T	T	T	.	.
14	I	i	.	.	.	E	.	B	B	.	B	.	.	T	T	T	S	S
15	K	i	.	E	.	E	.	B	.	.	B	B	.	T	T	T	S	S
16	S	i	.	E	.	E	.	B	.	.	B	B	B	T	T	T	.	.
17	P	i	E	E	.	E	.	B	.	.	B	B	B	T	T	T	.	.
18	V	i	E	.	E	E	E	B	.	.	B	B	B	T	T	T	S	S
19	L	i	.	.	.	E	.	B	.	.	B	.	B	T	T	T	S	S
20	R	i	.	.	.	E	.	B	.	.	B	B	B	T	T	T	.	.
21	E	i	.	E	.	E	.	B	.	.	B	.	B	T	T	.	.	.
22	F	M	E	.	.	.	.	.	.	.	B	B	B	T	T	.	S	S
23	L	M	.	.	.	.	.	.	.	.	B	B	B	T	T	.	.	S
24	A	M	.	.	.	.	.	.	.	.	B	.	.	T	T	.	S	.
25	E	M	.	.	.	.	.	.	.	.	B	.	.	T	T	.	.	.
26	F	M	.	.	.	.	.	.	.	.	B	.	.	T	.	.	S	S
27	F	M	.	.	.	.	.	.	.	.	B	.	B	T	.	.	.	S
28	G	M	.	.	.	E	.	.	.	.	.	.	.	T	.	.	.	.
29	T	M	.	.	.	.	.	B	.	.	.	.	.	T	.	.	.	.
30	F	M	.	.	.	.	.	B	.	.	.	.	.	T	.	T	S	S
31	I	M	.	.	.	.	.	B	.	.	.	.	.	T	T	T	.	.
32	L	M	.	.	.	.	.	B	.	.	.	B	.	T	T	T	S	S
33	Y	M	.	.	.	.	.	.	.	.	.	B	.	T	T	T	S	.
34	I	M	.	.	.	.	.	B	.	.	.	.	.	T	T	T	.	.
35	F	M	.	.	E	.	.	B	.	.	.	.	.	T	T	T	S	S
36	G	M	.	.	E	E	.	.	.	.	.	.	.	T	T	T	.	.
37	G	M	.	.	E	E	.	.	.	.	.	.	.	T	T	T	.	.
38	A	M	.	.	E	E	.	.	.	.	.	.	.	T	T	T	.	.
39	S	M	.	.	E	.	E	.	.	.	.	.	.	T	T	T	.	.
40	F	M	.	.	E	.	E	B	.	.	.	.	.	T	T	T	S	S
41	A	M	.	.	.	.	.	B	.	.	B	.	.	T	T	T	.	.
42	H	o	.	.	.	.	.	B	.	.	B	.	B	T	T	T	.	.
43	Y	o	.	.	.	.	.	B	.	.	B	.	B	T	T	T	S	.
44	I	o	.	.	E	.	.	B	B	.	B	.	B	T	T	T	S	.
45	F	o	.	.	E	.	E	B	B	.	B	.	B	T	T	.	S	S
46	S	o	.	E	E	E	E	.	B	.	B	.	B	T	.	.	.	.
47	G	o	E	E	E	E	E	.	B	.	B	.	B	T	.	.	.	.
48	Q	o	E	E	E	E	E	.	B	.	B	.	B	T	.	.	.	.
49	K	o	E	E	E	E	E	B	B	.	B	.	B	T	.	.	S	.
50	D	o	E	E	E	E	E	B	B	.	B	.	B	T	.	.	.	.
51	V	M	.	.	.	E	E	B	.	.	B	.	B	T	.	.	.	S
52	L	M	.	.	.	.	E	B	.	.	B	.	B	T	.	.	S	S
53	A	M	.	.	.	.	.	B	.	.	B	.	.	T	.	.	.	.
54	V	M	.	.	.	.	.	B	.	.	B	.	.	T	.	.	S	S
55	T	M	.	.	.	.	.	B	.	.	B	.	.	T	.	.	.	.
56	F	M	.	E	.	.	.	B	.	.	B	.	B	T	.	.	S	S
57	C	M	.	.	.	.	.	B	.	.	.	.	.	T	.	.	.	.
58	W	M	.	.	E	.	.	.	.	.	.	.	.	T	.	.	S	S
59	G	M	.	.	E	.	.	.	.	.	.	.	.	.	.	.	.	.
60	M	M	.	E	E	.	.	.	.	.	.	.	.	.	.	.	.	S
61	G	M	.	.	.	.	.	.	.	.	.	.	.	.	.	.	.	.
62	V	M	.	.	E	.	.	.	.	.	.	.	.	.	.	.	S	.
63	M	M	.	.	.	.	.	.	.	.	.	.	.	.	.	.	.	S
64	L	M	.	.	.	.	.	B	.	.	B	.	.	.	.	.	S	S
65	G	M	.	.	.	.	.	B	.	.	B	.	.	.	.	.	.	.
66	I	M	.	.	E	E	E	.	.	.	B	.	.	.	.	.	.	.
67	Q	M	.	.	E	E	E	.	.	.	B	.	B	.	.	.	.	.
68	T	M	.	.	E	E	E	.	.	.	B	.	.	.	.	T	.	.
69	G	M	.	.	E	E	E	.	.	B	B	.	.	.	.	T	S	.
70	A	M	.	.	E	E	E	.	.	B	B	.	B	.	.	T	S	.
71	G	M	.	.	E	E	E	.	.	B	B	.	.	.	.	T	.	.
72	V	M	.	.	E	E	E	.	.	B	B	.	.	.	.	T	S	S
73	S	i	.	.	E	E	E	.	.	B	B	.	.	T	.	T	.	.
74	G	i	.	.	E	E	E	B	.	B	B	.	.	T	.	T	.	.
75	G	i	.	.	E	E	E	B	.	B	B	.	.	T	.	T	.	.
76	H	i	.	.	E	E	E	.	.	B	B	.	.	T	.	T	.	.
77	V	i	.	.	E	E	E	B	.	B	B	.	.	T	.	T	.	S
78	N	i	.	.	E	E	E	B	.	B	B	B	.	T	.	T	.	.
79	P	i	.	.	.	E	E	B	.	B	B	B	.	T	.	T	.	.
80	V	i	.	.	.	E	E	B	.	B	.	B	.	T	.	T	S	.
81	V	i	.	.	E	E	E	B	.	B	.	.	.	T	.	T	.	S
82	T	i	.	.	E	E	.	B	.	B	.	B	.	T	.	T	.	.
83	T	i	.	.	.	E	.	B	.	B	.	.	.	T	.	T	.	.
84	P	i	E	.	E	E	E	B	.	.	.	.	.	T	.	T	S	.
85	F	i	.	.	E	E	E	B	.	B	.	.	.	T	.	T	S	S
86	A	i	.	.	E	E	E	B	.	B	.	.	B	T	.	T	S	.
87	S	i	.	.	E	E	E	B	.	.	.	.	B	T	.	T	.	.
88	V	i	.	.	.	E	.	B	.	.	.	.	B	T	.	T	S	S
89	G	i	.	E	E	E	E	B	.	.	.	.	B	T	.	T	.	.
90	R	i	.	E	E	E	.	B	.	.	.	.	B	T	.	T	.	.
91	L	i	E	.	E	E	.	.	.	.	.	.	B	T	.	T	S	.
92	P	i	E	E	E	E	E	.	.	.	.	B	B	T	.	T	.	.
93	W	i	E	.	.	E	.	B	.	.	.	B	B	T	.	T	S	S
94	K	i	E	E	E	E	.	B	.	.	.	.	B	T	.	T	.	.
95	K	i	E	.	E	E	E	B	.	.	.	B	B	T	.	T	.	.
96	V	i	E	.	E	E	E	B	.	.	.	B	B	T	.	T	.	.
97	P	i	E	.	E	.	E	B	.	.	.	B	B	T	.	T	.	.
98	H	i	.	.	.	.	.	B	.	.	.	B	B	T	.	T	S	.
99	Y	M	.	.	E	.	.	B	.	.	.	B	.	T	.	T	S	S
100	L	M	.	.	E	.	.	B	.	.	.	B	.	T	.	.	S	S
101	L	M	.	.	E	.	.	B	.	.	.	B	B	T	.	.	S	S
102	G	M	.	.	.	E	.	B	.	.	.	B	.	T	.	T	.	.
103	Q	M	.	.	E	E	.	B	.	.	.	B	.	T	.	T	.	.
104	H	M	.	.	E	E	E	B	.	.	.	.	.	T	.	T	.	.
105	L	M	.	.	E	.	E	.	.	.	.	.	.	T	.	T	S	S
106	G	M	.	.	.	.	.	B	.	.	.	.	.	T	.	T	.	.
107	A	M	.	.	.	.	.	.	.	.	B	.	.	T	.	T	S	.
108	F	M	.	.	.	.	.	B	.	.	B	.	.	T	.	T	.	S
109	L	M	.	.	.	.	.	.	.	.	B	.	.	T	.	T	.	S
110	A	M	.	.	.	.	.	.	.	.	B	.	.	T	.	T	.	.
111	S	M	.	.	.	.	.	B	.	.	B	.	.	T	T	T	.	.
112	A	M	.	.	.	.	.	B	.	.	B	.	.	T	T	T	.	.
113	I	M	.	.	.	.	.	B	.	.	B	.	B	T	T	T	.	.
114	L	M	.	.	.	.	.	B	.	.	B	.	.	T	T	T	S	S
115	Y	M	.	.	.	.	.	B	.	.	B	.	B	T	T	T	S	S
116	F	M	.	.	.	.	.	B	.	.	B	B	B	T	T	T	.	S
117	N	o	E	.	E	.	.	B	.	.	B	.	B	T	T	.	.	.
118	Y	o	.	.	E	.	.	.	.	.	B	.	B	T	T	.	S	.
119	I	o	.	.	.	.	.	B	.	.	B	.	B	T	T	.	S	S
120	D	o	.	E	E	.	E	.	.	.	B	.	B	T	T	.	.	.
121	A	o	.	.	E	.	E	B	.	.	B	.	B	T	T	.	S	.
122	L	o	E	.	E	.	E	B	B	.	B	.	B	T	T	.	S	S
123	D	o	E	E	E	.	E	.	B	.	B	.	B	T	T	.	.	.
124	H	o	E	E	E	E	E	.	B	B	B	.	B	T	T	.	.	.
125	Y	o	E	.	E	E	E	.	B	B	B	.	B	T	T	.	S	S
126	D	o	E	E	E	E	E	.	B	B	B	B	B	T	.	.	.	.
127	G	o	E	E	E	E	E	.	B	B	B	B	B	T	.	.	.	.
128	G	o	E	E	E	E	E	.	B	B	B	B	B	T	.	.	.	.
129	E	o	E	E	E	E	E	.	B	B	B	B	B	T	.	.	.	.
130	R	o	E	E	E	E	E	.	B	B	B	.	B	T	.	.	.	.
131	Q	o	E	.	E	E	E	.	B	B	B	.	B	T	.	.	.	.
132	I	o	E	.	E	E	E	.	B	B	.	.	B	T	.	.	S	.
133	F	o	E	.	E	E	E	.	B	B	.	.	B	T	.	.	.	S
134	G	o	.	E	E	E	E	.	B	B	.	B	B	T	.	.	.	.
135	D	o	E	E	E	E	E	.	B	B	.	.	B	T	.	.	.	.
136	R	o	E	E	E	E	E	.	B	.	.	.	B	T	.	.	.	S
137	G	o	E	.	E	E	E	.	B	.	.	.	.	T	.	.	.	.
138	T	o	.	.	E	E	E	.	B	.	.	.	.	T	.	.	.	.
139	G	o	.	.	E	E	.	.	.	.	.	.	.	T	.	.	.	.
140	I	o	.	.	E	E	.	.	.	.	.	.	.	T	.	.	S	.
141	L	o	.	.	.	E	.	.	.	.	.	.	.	T	.	.	S	S
142	L	o	.	.	.	E	.	B	.	.	.	.	.	T	.	.	S	S
143	T	o	.	.	.	E	.	B	.	.	.	B	.	T	.	.	.	.
144	T	o	E	.	E	E	.	.	.	.	.	.	.	T	.	.	.	.
145	F	o	E	.	E	E	E	.	.	.	.	.	.	T	.	.	S	S
146	P	o	E	.	E	E	E	.	.	.	.	B	.	T	.	.	.	.
147	N	o	E	.	E	E	E	.	.	.	.	.	B	T	.	.	.	.
148	E	o	E	E	E	E	E	B	.	.	.	B	B	T	.	.	.	.
149	H	o	.	E	E	E	E	B	.	.	.	B	B	T	.	.	.	.
150	V	M	.	.	E	.	E	B	.	.	.	B	B	T	.	.	S	S
151	H	M	.	.	.	.	.	B	.	.	.	B	B	T	.	.	.	.
152	L	M	.	.	.	.	.	B	.	.	.	B	B	T	.	.	S	S
153	S	M	.	.	.	.	.	B	.	.	.	B	B	T	.	.	.	.
154	I	M	.	.	.	.	.	B	.	.	.	B	B	T	.	.	.	S
155	C	M	.	.	.	.	.	B	.	.	.	B	.	T	.	.	.	.
156	I	M	.	.	E	.	.	B	.	.	.	.	B	T	.	.	.	.
157	F	M	.	.	.	.	.	B	.	.	.	B	B	T	.	.	S	S
158	D	M	.	.	.	E	.	B	.	.	.	B	.	T	.	.	.	.
159	T	M	.	.	.	.	.	B	.	.	.	B	.	T	.	.	.	.
160	I	M	.	.	E	.	.	B	.	.	.	.	.	T	.	.	.	.
161	I	M	.	.	E	.	E	B	.	.	.	.	.	T	.	.	.	S
162	C	M	.	.	E	.	.	B	.	.	.	B	.	T	.	.	.	.
163	S	M	.	.	.	.	.	B	.	.	.	B	.	T	.	.	.	.
164	G	M	.	.	.	.	.	B	.	.	.	B	.	T	.	.	.	.
165	L	M	.	.	E	.	.	B	.	.	.	B	.	T	.	.	.	S
166	L	M	.	.	.	.	.	.	.	.	.	.	.	T	T	.	.	S
167	M	M	.	.	.	.	.	B	.	.	B	.	.	T	T	.	.	S
168	F	M	.	.	.	.	.	.	.	.	B	.	.	T	T	.	.	S
169	T	M	.	.	.	.	.	B	.	.	B	.	.	.	T	.	.	.
170	I	M	.	.	.	.	.	B	.	.	B	.	.	.	T	.	.	S
171	M	M	.	.	.	.	.	B	.	.	B	B	.	.	T	.	.	.
172	V	M	.	.	.	.	.	B	.	.	B	.	B	.	T	.	S	.
173	I	M	.	.	.	.	.	.	.	.	B	.	.	.	T	.	S	.
174	I	M	.	.	.	.	.	.	.	.	B	.	.	.	T	.	.	S
175	D	i	E	.	E	E	E	.	.	.	B	.	B	.	T	.	.	.
176	N	i	E	E	E	E	E	.	B	.	B	.	B	.	T	.	.	.
177	K	i	E	E	E	E	E	.	B	B	B	B	B	.	T	.	.	.
178	N	i	E	E	E	E	E	.	B	B	B	B	B	.	T	.	.	.
179	A	i	E	E	E	E	E	.	B	B	B	B	B	.	T	.	.	S
180	N	i	E	E	E	E	E	.	B	B	B	B	B	T	T	.	.	.
181	T	i	E	E	E	E	E	.	B	B	B	B	B	T	.	.	.	.
182	T	i	E	.	E	E	E	.	B	B	B	.	B	T	.	.	.	.
183	S	i	E	E	E	E	E	.	B	B	.	.	B	T	.	.	.	.
184	G	i	.	.	E	E	E	.	B	.	.	.	B	T	.	.	.	.
185	M	i	.	.	E	.	E	.	.	.	.	.	B	T	.	.	S	S
186	H	i	.	.	.	.	.	.	.	.	.	.	B	T	.	.	.	.
187	A	M	.	.	.	.	.	B	.	.	.	.	.	T	.	.	.	.
188	F	M	.	.	.	.	.	B	.	.	.	.	B	T	.	.	.	S
189	L	M	.	.	.	.	.	B	.	.	.	.	B	T	.	.	.	S
190	I	M	.	.	.	.	.	B	.	.	.	.	.	T	.	.	.	S
191	G	M	.	.	.	.	.	B	.	.	.	B	.	T	.	.	.	.
192	I	M	.	E	.	.	.	B	.	.	.	.	B	T	.	.	.	S
193	M	M	.	.	.	.	.	.	.	.	.	.	.	T	.	.	.	.
194	V	M	.	.	.	.	.	B	.	.	.	.	.	T	.	.	S	.
195	M	M	.	.	.	.	.	.	.	.	.	.	B	.	.	.	S	S
196	A	M	.	.	.	.	.	B	.	.	B	.	.	.	.	.	.	.
197	L	M	.	.	.	.	.	B	.	.	B	.	.	.	.	.	S	S
198	C	M	.	.	.	.	.	B	.	.	B	.	.	.	.	.	.	.
199	W	M	.	.	.	.	.	B	.	.	B	.	B	.	.	T	.	S
200	A	M	.	.	.	.	.	B	.	.	B	.	B	.	.	T	.	.
201	F	M	.	.	E	.	E	.	.	.	B	.	.	.	.	T	.	S
202	G	M	.	.	E	E	E	.	.	.	B	.	.	.	.	T	.	.
203	T	M	.	.	E	E	E	.	.	.	B	.	B	.	.	T	.	.
204	N	M	.	.	E	.	E	.	.	.	B	.	B	.	.	T	.	.
205	C	M	.	.	E	.	E	.	.	.	B	.	.	.	.	T	.	.
206	M	M	.	.	.	.	E	B	.	.	B	.	.	.	.	T	S	S
207	A	M	.	.	E	.	E	.	.	.	B	.	.	T	.	T	.	.
208	A	M	.	.	E	.	E	B	.	.	B	.	.	T	.	T	.	.
209	V	M	.	.	.	.	E	.	.	.	B	.	.	T	.	T	S	S
210	N	o	E	.	.	E	E	.	.	B	B	.	.	T	.	T	.	.
211	P	o	E	.	E	E	E	.	.	B	B	.	.	T	.	T	.	.
212	A	o	E	.	E	E	E	.	.	B	.	.	.	T	.	T	.	.
213	R	o	E	.	E	E	E	.	.	B	.	B	.	T	.	T	.	.
214	D	o	E	.	E	E	E	.	.	B	.	B	.	T	.	.	.	.
215	F	o	E	.	E	E	E	.	.	B	.	B	.	T	.	.	.	S
216	P	o	E	.	E	E	E	.	.	B	.	B	.	T	.	.	.	.
217	P	o	.	.	E	E	.	B	.	B	.	.	.	T	.	.	.	.
218	R	o	.	.	.	E	.	B	.	.	.	.	.	T	.	.	S	.
219	V	o	.	.	E	E	.	B	.	.	.	.	.	T	.	.	S	S
220	L	o	.	.	.	.	.	B	.	.	.	.	.	T	.	.	S	S
221	A	o	.	.	.	.	.	.	.	.	.	.	.	T	.	.	S	.
222	S	o	.	.	.	.	.	.	.	.	B	.	B	T	.	.	.	.
223	I	o	.	.	.	.	.	B	.	.	B	.	B	T	.	.	S	.
224	V	o	.	.	E	.	E	B	.	.	B	.	B	T	.	.	S	S
225	G	o	.	.	E	.	E	B	.	.	B	.	B	T	.	.	.	.
226	Y	o	.	.	E	E	E	B	.	B	B	.	.	T	.	.	S	S
227	G	o	.	E	E	E	E	B	B	.	B	.	B	T	.	T	.	.
228	P	o	.	E	E	E	E	.	B	B	B	.	B	T	.	T	.	.
229	E	o	.	E	E	E	E	B	B	B	B	.	B	T	.	T	.	.
230	V	o	E	E	E	E	E	B	B	.	B	.	.	T	.	T	.	.
231	F	o	E	.	.	.	E	B	B	.	B	B	.	T	T	T	.	S
232	T	o	E	E	.	.	E	B	B	.	B	B	B	T	T	T	.	.
233	Y	o	E	E	.	.	.	B	B	.	B	B	B	T	T	T	S	S
234	R	o	E	.	.	.	.	.	B	.	B	.	B	T	T	T	S	.
235	H	o	E	.	.	.	.	.	.	.	B	.	B	T	T	T	S	.
236	F	M	.	.	.	.	.	.	.	.	B	.	.	T	T	T	.	.
237	W	M	.	.	.	.	.	.	.	.	B	.	.	T	T	T	S	S
238	W	M	.	.	.	.	.	.	.	.	.	.	B	T	T	T	.	S
239	I	M	.	.	.	.	.	.	.	.	.	.	.	T	T	T	.	.
240	P	M	.	.	.	.	.	.	.	.	.	.	.	T	T	T	.	.
241	M	M	.	.	.	.	.	.	.	.	.	.	.	T	T	T	S	S
242	F	M	.	.	.	.	.	B	.	.	.	.	.	T	T	T	S	S
243	I	M	.	.	.	.	.	B	.	.	.	I	.	T	T	T	S	.
244	P	M	.	.	.	.	.	B	.	.	.	.	.	T	T	T	.	.
245	H	M	.	.	E	.	.	B	.	.	.	.	.	T	T	T	.	.
246	V	M	.	.	E	E	.	B	.	.	.	V	.	T	T	T	S	S
247	G	M	.	.	E	E	.	B	.	.	.	G	.	T	T	.	.	.
248	G	M	.	.	E	E	.	B	.	.	.	.	.	T	T	.	.	.
249	L	M	.	.	E	E	.	.	.	.	.	.	B	T	T	.	.	S
250	I	M	.	.	E	E	.	.	.	.	.	.	B	T	T	T	.	S
251	G	M	.	.	E	E	.	.	.	.	.	.	.	T	T	T	.	.
252	T	M	.	.	.	E	.	B	.	.	.	.	.	T	T	T	.	.
253	W	M	.	.	.	.	.	B	.	.	.	W	B	T	T	T	S	S
254	L	M	.	.	.	.	.	B	.	.	.	L	B	T	T	T	.	S
255	Y	M	.	.	.	.	.	B	.	.	.	.	B	T	T	T	S	S
256	V	M	.	E	.	.	.	B	.	.	B	.	B	T	T	T	S	S
257	L	M	.	.	.	.	.	B	.	.	B	.	B	T	T	T	S	S
258	A	M	.	.	.	.	.	B	.	.	B	.	B	T	T	T	.	.
259	I	M	.	.	.	.	.	B	.	.	B	.	B	T	T	T	S	.
260	E	i	.	E	.	.	.	B	.	.	B	.	B	T	T	T	.	.
261	M	i	.	.	.	.	.	B	B	.	B	.	B	T	T	T	S	S
262	H	i	.	E	.	.	.	B	B	.	B	.	B	T	T	T	.	.
263	I	i	.	.	.	.	E	.	B	.	B	I	B	T	T	T	.	.
264	V	i	E	E	.	.	E	.	B	.	B	V	.	T	T	T	.	.
265	P	i	.	E	.	E	E	B	B	.	B	P	.	T	T	T	.	.
266	E	i	E	E	.	E	E	B	B	.	B	E	.	T	.	T	.	.
267	R	i	E	E	E	E	E	.	B	B	B	R	.	T	.	T	S	.
268	V	i	E	.	E	E	E	.	B	B	B	V	.	T	.	T	S	S
269	R	i	E	E	E	E	E	.	B	B	B	R	.	T	.	T	.	.
270	D	i	E	E	E	E	E	.	B	B	B	D	.	T	.	T	.	.
271	D	i	E	E	E	E	E	.	B	B	B	D	.	T	.	T	.	.
272	R	i	E	E	E	E	E	.	B	B	B	R	.	T	.	T	.	S
273	T	i	E	E	E	E	E	.	B	B	B	T	.	T	.	T	.	.
274	E	i	E	E	.	E	E	.	B	B	B	E	.	T	.	T	.	.
275	R	i	E	E	.	E	E	.	B	B	B	R	.	T	.	T	S	.
276	E	i	E	E	.	E	E	.	B	B	B	E	.	T	.	.	.	.
277	M	i	E	E	.	E	E	.	B	.	B	M	.	T	.	.	S	S
278	T	i	.	E	.	E	E	.	B	.	B	.	.	T	.	.	.	.
279	N	i	.	E	E	E	.	.	B	.	B	.	.	T	.	.	.	.
280	L	i	.	E	.	E	.	B	B	.	.	.	.	T	.	.	S	S
281	L	i	.	E	E	E	.	B	B	.	.	.	.	T	.	.	S	.
282	P	i	.	E	E	E	.	B	B	.	.	P	.	T	.	.	.	.
283	L	i	E	E	E	E	.	B	B	B	.	L	.	T	.	.	S	.
284	P	i	E	E	E	E	.	B	B	B	.	P	.	T	.	.	.	.
285	P	i	E	E	E	E	E	.	B	B	.	P	.	T	.	.	.	.
286	R	i	E	E	E	E	E	.	B	B	.	R	.	T	.	.	.	S
287	T	i	E	E	E	E	E	.	B	B	.	T	.	T	.	.	.	.
288	E	i	E	E	E	E	E	.	B	B	.	E	.	T	.	.	.	.
289	K	i	E	E	E		E	.	B	B	.	K	.	T	.	.	S	.
290	T	i		E					.	B	.	.	.	T	.	.	.	.
291	G	i		E					.	B	.	.	.	T	.	.	.	.
292	V	i		E					.	B	.	.	.	T	.	.	S	S
																	S	.

## Sheet: Figure OmAQP97
	Position	1									10										20										30										40
Structure and exposure	Sequence	M	A	N	P	P	F	P	F	M	K	R	F	V	I	K	S	P	V	L	R	E	F	L	A	E	F	F	G	T	F	I	L	Y	I	F	G	G	A	S	F	A	H	Y	I	F	S	G	Q
	TMHMM	i	i	i	i	i	i	i	i	i	i	i	i	i	i	i	i	i	i	i	i	i	M	M	M	M	M	M	M	M	M	M	M	M	M	M	M	M	M	M	M	M	o	o	o	o	o	o	o
	Emini (accesibility)			E	E	E	.	E	E	E	.	.	E	.	.	.	.	E	E	.	.	.	E	.	.	.	.	.	.	.	.	.	.	.	.	.	.	.	.	.	.	.	.	.	.	.	.	E	E
	BepiPred 2.0 (surface)	E	E	E	E	E	E	E	.	.	E	E	.	E	.	E	E	E	.	.	.	E	.	.	.	.	.	.	.	.	.	.	.	.	.	.	.	.	.	.	.	.	.	.	.	.	E	E	E
	Chou & Fasman (turns)				E	E	E	E	E	.	.	.	.	.	.	.	.	.	E	.	.	.	.	.	.	.	.	.	.	.	.	.	.	.	.	E	E	E	E	E	E	.	.	.	E	E	E	E	E
	Karplus & Scoultz (flexibility)				E	E	E	.	.	.	E	.	.	E	E	E	E	E	E	E	E	E	.	.	.	.	.	.	E	.	.	.	.	.	.	.	E	E	E	.	.	.	.	.	.	.	E	E	E
	Parker (hydrophilicity)				.	.	.	.	.	.	.	.	.	.	.	.	.	.	E	.	.	.	.	.	.	.	.	.	.	.	.	.	.	.	.	.	.	.	.	E	E	.	.	.	.	E	E	E	E
Linear and discontinuous B cell epitopes	Kolaskar & Tongaonkar				.	.	.	.	.	.	.	B	.	B	B	B	B	B	B	B	B	B	.	.	.	.	.	.	.	B	B	B	B	.	B	B	.	.	.	.	B	B	B	B	B	B	.	.	.
	BepiPred 2.0	.	.	.	.	.	B	B	B	B	B	B	B	B	B	.	.	.	.	.	.	.	.	.	.	.	.	.	.	.	.	.	.	.	.	.	.	.	.	.	.	.	.	.	B	B	B	B	B
	BepiPred 1.0	B	B	B	B	B	B	B	.	.	.	.	.	.	.	.	.	.	.	.	.	.	.	.	.	.	.	.	.	.	.	.	.	.	.	.	.	.	.	.	.	.	.	.	.	.	.	.	.
	ABCpred	.	.	.	.	.	.	.	.	.	.	B	B	B	B	B	B	B	B	B	B	B	B	B	B	B	B	B	.	.	.	.	.	.	.	.	.	.	.	.	.	B	B	B	B	B	B	B	B
	BcePred	.	.	.	.	.	.	.	.	.	.	.	B	B	.	B	B	B	B	.	B	.	B	B	.	.	.	.	.	.	.	.	B	B	.	.	.	.	.	.	.	.	.	.	.	.	.	.	.
	ElliPro (discontinuous)	.	.	.	.	.	.	.	.	.	.	.	.	.	.	.	B	B	B	B	B	B	B	B	.	.	.	B	.	.	.	.	.	.	.	.	.	.	.	.	.	.	B	B	B	B	B	B	B
T cell epitopes	MHC I IEDB Pig	T	T	T	T	T	T	T	T	T	T	T	T	T	T	T	T	T	T	T	T	T	T	T	T	T	T	T	T	T	T	T	T	T	T	T	T	T	T	T	T	T	T	T	T	T	T	T	T
	MHC II IEDB Human	.	.	.	.	.	T	T	T	T	T	T	T	T	T	T	T	T	T	T	T	T	T	T	T	T	.	.	.	.	.	T	T	T	T	T	T	T	T	T	T	T	T	T	T	T	.	.	.
	MHC II IEDB Mouse	T	T	T	T	T	T	T	T	T	T	T	T	T	T	T	T	T	T	T	T	.	.	.	.	.	.	.	.	.	T	T	T	T	T	T	T	T	T	T	T	T	T	T	T	.	.	.	.
Proteasomal processing	NetChop	S	.	.	.	.	.	.	S	S	S	S	S	.	S	S	.	.	S	S	.	.	S	.	S	.	S	.	.	.	S	.	S	S	.	S	.	.	.	.	S	.	.	S	S	S	.	.	.
	PCPS	S	S	.	.	.	S	.	S	S	.	.	S	.	S	S	.	.	S	S	.	.	S	S	.	.	S	S	.	.	S	.	S	.	.	S	.	.	.	.	S	.	.	.	.	S	.	.	.
	Antigenic peptides																																										OmAQP97_A
					Key OmAQP97:
					o (outside), extracellular; M, transmembrane; i, intracellular
					E, exposed on surface, predicted turns, hydrophilic
					F, predicted turns and flexibility
					B, B-cell epitope
					T, T-cell epitope
					S, predicted proteasome cut site
[truncated: 244 more columns]

## Sheet: TMHMM
TMHMM result
# OmAQP97 Length: 292
# OmAQP97 Number of predicted TMHs: 5
# OmAQP97 Exp number of AAs in TMHs: 127.86118
# OmAQP97 Exp number, first 60 AAs: 29.63256
# OmAQP97 Total prob of N-in: 0.26882
# OmAQP97 POSSIBLE N-term signal sequence
OmAQP97	TMHMM2.0	outside	1	21
OmAQP97	TMHMM2.0	TMhelix	22	44
OmAQP97	TMHMM2.0	inside	45	50
OmAQP97	TMHMM2.0	TMhelix	51	73
OmAQP97	TMHMM2.0	outside	74	151
OmAQP97	TMHMM2.0	TMhelix	152	174
OmAQP97	TMHMM2.0	inside	175	186
OmAQP97	TMHMM2.0	TMhelix	187	209
OmAQP97	TMHMM2.0	outside	210	236
OmAQP97	TMHMM2.0	TMhelix	237	259
OmAQP97	TMHMM2.0	inside	260	292

## Sheet: Emini (accesibility)
Position	Residue	Start	End	Peptide	Score
3	N	1	6	MANPPF	1052
4	P	2	7	ANPPFP	1644
5	P	3	8	NPPFPF	1409
6	F	4	9	PPFPFM	0.867
7	P	5	10	PFPFMK	1122
8	F	6	11	FPFMKR	1421
9	M	7	12	PFMKRF	1421
10	K	8	13	FMKRFV	0.682
11	R	9	14	MKRFVI	0.552
12	F	10	15	KRFVIK	1116
13	V	11	16	RFVIKS	0.748
14	I	12	17	FVIKSP	0.59
15	K	13	18	VIKSPV	0.506
16	S	14	19	IKSPVL	0.562
17	P	15	20	KSPVLR	1571
18	V	16	21	SPVLRE	1.36
19	L	17	22	PVLREF	0.879
20	R	18	23	VLREFL	0.469
21	E	19	24	LREFLA	0.638
22	F	20	25	REFLAE	1.34
23	L	21	26	EFLAEF	0.592
24	A	22	27	FLAEFF	0.296
25	E	23	28	LAEFFG	0.338
26	F	24	29	AEFFGT	0.592
27	F	25	30	EFFGTF	0.508
28	G	26	31	FFGTFI	0.206
29	T	27	32	FGTFIL	0.196
30	F	28	33	GTFILY	0.354
31	I	29	34	TFILYI	0.251
32	L	30	35	FILYIF	0.151
33	Y	31	36	ILYIFG	0.172
34	I	32	37	LYIFGG	0.243
35	F	33	38	YIFGGA	0.298
36	G	34	39	IFGGAS	0.254
37	G	35	40	FGGASF	0.314
38	A	36	41	GGASFA	0.367
39	S	37	42	GASFAH	0.504
40	F	38	43	ASFAHY	0.798
41	A	39	44	SFAHYI	0.554
42	H	40	45	FAHYIF	0.358
43	Y	41	46	AHYIFS	0.554
44	I	42	47	HYIFSG	0.543
45	F	43	48	YIFSGQ	0.691
46	S	44	49	IFSGQK	0.881
47	G	45	50	FSGQKD	2.1
48	Q	46	51	SGQKDV	1.8
49	K	47	52	GQKDVL	1108
50	D	48	53	QKDVLA	1131
51	V	49	54	KDVLAV	0.485
52	L	50	55	DVLAVT	0.35
53	A	51	56	VLAVTF	0.181
54	V	52	57	LAVTFC	0.131
55	T	53	58	AVTFCW	0.167
56	F	54	59	VTFCWG	0.164
57	C	55	60	TFCWGM	0.218
58	W	56	61	FCWGMG	0.15
59	G	57	62	CWGMGV	0.128
60	M	58	63	WGMGVM	0.237
61	G	59	64	GMGVML	0.186
62	V	60	65	MGVMLG	0.186
63	M	61	66	GVMLGI	0.131
64	L	62	67	VMLGIQ	0.23
65	G	63	68	MLGIQT	0.447
66	I	64	69	LGIQTG	0.447
67	Q	65	70	GIQTGA	0.548
68	T	66	71	IQTGAG	0.548
69	G	67	72	QTGAGV	0.58
70	A	68	73	TGAGVS	0.449
71	G	69	74	GAGVSG	0.308
72	V	70	75	AGVSGG	0.308
73	S	71	76	GVSGGH	0.415
74	G	72	77	VSGGHV	0.311
75	G	73	78	SGGHVN	0.674
76	H	74	79	GGHVNP	0.778
77	V	75	80	GHVNPV	0.583
78	N	76	81	HVNPVV	0.437
79	P	77	82	VNPVVT	0.464
80	V	78	83	NPVVTT	0.902
81	V	79	84	PVVTTP	0.867
82	T	80	85	VVTTPF	0.486
83	T	81	86	VTTPFA	0.661
84	P	82	87	TTPFAS	1194
85	F	83	88	TPFASV	0.614
86	A	84	89	PFASVG	0.421
87	S	85	90	FASVGR	0.533
88	V	86	91	ASVGRL	0.508
89	G	87	92	SVGRLP	0.777
90	R	88	93	VGRLPW	0.61
91	L	89	94	GRLPWK	1643
92	P	90	95	RLPWKK	3321
93	W	91	96	LPWKKV	1258
94	K	92	97	PWKKVP	2359
95	K	93	98	WKKVPH	2076
96	V	94	99	KKVPHY	3094
97	P	95	100	KVPHYL	1276
98	H	96	101	VPHYLL	0.526
99	Y	97	102	PHYLLG	0.702
100	L	98	103	HYLLGQ	0.786
101	L	99	104	YLLGQH	0.786
102	G	100	105	LLGQHL	0.414
103	Q	101	106	LGQHLG	0.496
104	H	102	107	GQHLGA	0.608
105	L	103	108	QHLGAF	0.532
106	G	104	109	HLGAFL	0.253
107	A	105	110	LGAFLA	0.188
108	F	106	111	GAFLAS	0.306
109	L	107	112	AFLASA	0.312
110	A	108	113	FLASAI	0.216
111	S	109	114	LASAIL	0.206
112	A	110	115	ASAILY	0.392
113	I	111	116	SAILYF	0.336
114	L	112	117	AILYFN	0.403
115	Y	113	118	ILYFNY	0.625
116	F	114	119	LYFNYI	0.625
117	N	115	120	YFNYID	1265
118	Y	116	121	FNYIDA	0.816
119	I	117	122	NYIDAL	0.777
120	D	118	123	YIDALD	0.807
121	A	119	124	IDALDH	0.701
122	L	120	125	DALDHY	1566
123	D	121	126	ALDHYD	1566
124	H	122	127	LDHYDG	1534
125	Y	123	128	DHYDGG	1841
126	D	124	129	HYDGGE	1909
127	G	125	130	YDGGER	2748
128	G	126	131	DGGERQ	3038
129	E	127	132	GGERQI	1275
130	R	128	133	GERQIF	1116
131	Q	129	134	ERQIFG	1116
132	I	130	135	RQIFGD	1076
133	F	131	136	QIFGDR	1076
134	G	132	137	IFGDRG	0.615
135	D	133	138	FGDRGT	1266
136	R	134	139	GDRGTG	1446
137	G	135	140	DRGTGI	1025
138	T	136	141	RGTGIL	0.506
139	G	137	142	GTGILL	0.213
140	I	138	143	TGILLT	0.311
141	L	139	144	GILLTT	0.311
142	L	140	145	ILLTTF	0.272
143	T	141	146	LLTTFP	0.6
144	T	142	147	LTTFPN	1169
145	F	143	148	TTFPNE	2456
146	P	144	149	TFPNEH	2315
147	N	145	150	FPNEHV	1191
148	E	146	151	PNEHVH	1871
149	H	147	152	NEHVHL	0.998
150	V	148	153	EHVHLS	0.832
151	H	149	154	HVHLSI	0.337
152	L	150	155	VHLSIC	0.133
153	S	151	156	HLSICI	0.125
154	I	152	157	LSICIF	0.08
155	C	153	158	SICIFD	0.161
156	I	154	159	ICIFDT	0.174
157	F	155	160	CIFDTI	0.174
158	D	156	161	IFDTII	0.227
159	T	157	162	FDTIIC	0.174
160	I	158	163	DTIICS	0.269
161	I	159	164	TIICSG	0.159
162	C	160	165	IICSGL	0.091
163	S	161	166	ICSGLL	0.107
164	G	162	167	CSGLLM	0.151
165	L	163	168	SGLLMF	0.244
166	L	164	169	GLLMFT	0.263
167	M	165	170	LLMFTI	0.186
168	F	166	171	LMFTIM	0.224
169	T	167	172	MFTIMV	0.201
170	I	168	173	FTIMVI	0.143
171	M	169	174	TIMVII	0.115
172	V	170	175	IMVIID	0.134
173	I	171	176	MVIIDN	0.306
174	I	172	177	VIIDNK	0.619
175	D	173	178	IIDNKN	1342
176	N	174	179	IDNKNA	1934
177	K	175	180	DNKNAN	4436
178	N	176	181	NKNANT	3834
179	A	177	182	KNANTT	3441
180	N	178	183	NANTTS	2306
181	T	179	184	ANTTSG	1419
182	T	180	185	NTTSGM	1.39
183	S	181	186	TTSGMH	1176
184	G	182	187	TSGMHA	0.823
185	M	183	188	SGMHAF	0.494
186	H	184	189	GMHAFL	0.304
187	A	185	190	MHAFLI	0.215
188	F	186	191	HAFLIG	0.215
189	L	187	192	AFLIGI	0.111
190	I	188	193	FLIGIM	0.109
191	G	189	194	LIGIMV	0.093
192	I	190	195	IGIMVM	0.112
193	M	191	196	GIMVMA	0.161
194	V	192	197	IMVMAL	0.134
195	M	193	198	MVMALC	0.103
196	A	194	199	VMALCW	0.109
197	L	195	200	MALCWA	0.148
198	C	196	201	ALCWAF	0.13
199	W	197	202	LCWAFG	0.127
200	A	198	203	CWAFGT	0.223
201	F	199	204	WAFGTN	0.668
202	G	200	205	AFGTNC	0.341
203	T	201	206	FGTNCM	0.334
204	N	202	207	GTNCMA	0.389
205	C	203	208	TNCMAA	0.397
206	M	204	209	NCMAAV	0.204
207	A	205	210	CMAAVN	0.204
208	A	206	211	MAAVNP	0.589
209	V	207	212	AAVNPA	0.602
210	N	208	213	AVNPAR	1166
211	P	209	214	VNPARD	1928
212	A	210	215	NPARDF	2249
213	R	211	216	PARDFP	2163
214	D	212	217	ARDFPP	2163
215	F	213	218	RDFPPR	4194
216	P	214	219	DFPPRV	1589
217	P	215	220	FPPRVL	0.785
218	R	216	221	PPRVLA	0.916
219	V	217	222	PRVLAS	0.793
220	L	218	223	RVLASI	0.36
221	A	219	224	VLASIV	0.136
222	S	220	225	LASIVG	0.182
223	I	221	226	ASIVGY	0.345
224	V	222	227	SIVGYG	0.338
225	G	223	228	IVGYGP	0.39
226	Y	224	229	VGYGPE	0.964
227	G	225	230	GYGPEV	0.964
228	P	226	231	YGPEVF	0.844
229	E	227	232	GPEVFT	0.777
230	V	228	233	PEVFTY	1.23
231	F	229	234	EVFTYR	1559
232	T	230	235	VFTYRH	1225
233	Y	231	236	FTYRHF	1429
234	R	232	237	TYRHFW	1735
235	H	233	238	YRHFWW	1264
236	F	234	239	RHFWWI	0.565
237	W	235	240	HFWWIP	0.446
238	W	236	241	FWWIPM	0.325
239	I	237	242	WWIPMF	0.325
240	P	238	243	WIPMFI	0.216
241	M	239	244	IPMFIP	0.318
242	F	240	245	PMFIPH	0.618
243	I	241	246	MFIPHV	0.297
244	P	242	247	FIPHVG	0.297
245	H	243	248	IPHVGG	0.339
246	V	244	249	PHVGGL	0.399
247	G	245	250	HVGGLI	0.181
248	G	246	251	VGGLIG	0.131
249	L	247	252	GGLIGT	0.256
250	I	248	253	GLIGTW	0.272
251	G	249	254	LIGTWL	0.226
252	T	250	255	IGTWLY	0.43
253	W	251	256	GTWLYV	0.455
254	L	252	257	TWLYVL	0.379
255	Y	253	258	WLYVLA	0.266
256	V	254	259	LYVLAI	0.177
257	L	255	260	YVLAIE	0.372
258	A	256	261	VLAIEM	0.235
259	I	257	262	LAIEMH	0.431
260	E	258	263	AIEMHI	0.366
261	M	259	264	IEMHIV	0.269
262	H	260	265	EMHIVP	0.593
263	I	261	266	MHIVPE	0.593
264	V	262	267	HIVPER	1174
265	P	263	268	IVPERV	0.64
266	E	264	269	VPERVR	1789
267	R	265	270	PERVRD	4026
268	V	266	271	ERVRDD	4348
269	R	267	272	RVRDDR	4917
270	D	268	273	VRDDRT	3623
271	D	269	274	RDDRTE	8454
272	R	270	275	DDRTER	8454
273	T	271	276	DRTERE	8767
274	E	272	277	RTEREM	5195
275	R	273	278	TEREMT	3828
276	E	274	279	EREMTN	4266
277	M	275	280	REMTNL	2031
278	T	276	281	EMTNLL	0.855
279	N	277	282	MTNLLP	0.764
280	L	278	283	TNLLPL	0.636
281	L	279	284	NLLPLP	0.682
282	P	280	285	LLPLPP	0.656
283	L	281	286	LPLPPR	1557
284	P	282	287	PLPPRT	2725
285	P	283	288	LPPRTE	3052
286	R	284	289	PPRTEK	7401
287	T	285	290	PRTEKT	6907
288	E	286	291	RTEKTG	4421
289	K	287	292	TEKTGV	1675

## Sheet: BepiPred 2.0 Surf
Entry	Position	AminoAcid	Exposed/Buried	RelativeSurfaceAccessilibity	HelixProbability	SheetProbability	CoilProbability	EpitopeProbability	Assignement B epit
OmAQP97	1	M	E	0.734	0.003	0.003	0.994	0.245222222222
OmAQP97	2	A	E	0.534	0.005	0.015	0.979	0.309333333333
OmAQP97	3	N	E	0.438	0.016	0.005	0.979	0.373333333333
OmAQP97	4	P	E	0.668	0.109	0.005	0.886	0.430666666667
OmAQP97	5	P	E	0.433	0.502	0.002	0.495	0.483888888889
OmAQP97	6	F	E	0.403	0.600	0.003	0.397	0.510222222222	B
OmAQP97	7	P	E	0.437	0.600	0.003	0.397	0.529666666667	B
OmAQP97	8	F	B	0.161	0.600	0.003	0.397	0.537333333333	B
OmAQP97	9	M	B	0.252	0.600	0.003	0.397	0.550777777778	B
OmAQP97	10	K	E	0.491	0.694	0.003	0.303	0.543555555556	B
OmAQP97	11	R	E	0.398	0.782	0.003	0.215	0.538444444444	B
OmAQP97	12	F	B	0.16	0.802	0.014	0.185	0.527222222222	B
OmAQP97	13	V	E	0.337	0.717	0.014	0.269	0.526777777778	B
OmAQP97	14	I	B	0.278	0.600	0.003	0.397	0.525111111111	B
OmAQP97	15	K	E	0.337	0.246	0.004	0.750	0.497444444444
OmAQP97	16	S	E	0.32	0.600	0.003	0.397	0.480444444444
OmAQP97	17	P	E	0.518	0.782	0.003	0.215	0.472333333333
OmAQP97	18	V	B	0.124	0.923	0.002	0.076	0.435777777778
OmAQP97	19	L	B	0.045	0.970	0.001	0.029	0.413888888889
OmAQP97	20	R	B	0.183	0.970	0.001	0.029	0.388777777778
OmAQP97	21	E	E	0.24	0.988	0.000	0.012	0.367
OmAQP97	22	F	B	0.043	0.988	0.000	0.012	0.338666666667
OmAQP97	23	L	B	0.093	0.988	0.000	0.012	0.325444444444
OmAQP97	24	A	B	0.063	0.988	0.000	0.012	0.32
OmAQP97	25	E	B	0.086	0.988	0.000	0.012	0.297777777778
OmAQP97	26	F	B	0.102	0.988	0.000	0.012	0.278888888889
OmAQP97	27	F	B	0.181	0.988	0.000	0.012	0.286333333333
OmAQP97	28	G	B	0.1	0.988	0.000	0.012	0.277666666667
OmAQP97	29	T	B	0.123	0.988	0.000	0.012	0.274333333333
OmAQP97	30	F	B	0.161	0.988	0.000	0.012	0.274333333333
OmAQP97	31	I	B	0.238	0.988	0.000	0.012	0.273444444444
OmAQP97	32	L	B	0.136	0.988	0.000	0.012	0.261222222222
OmAQP97	33	Y	B	0.117	0.988	0.000	0.012	0.264777777778
OmAQP97	34	I	B	0.176	0.970	0.001	0.029	0.266444444444
OmAQP97	35	F	B	0.188	0.970	0.001	0.029	0.274333333333
OmAQP97	36	G	B	0.128	0.970	0.001	0.029	0.28
OmAQP97	37	G	B	0.12	0.923	0.002	0.076	0.289
OmAQP97	38	A	B	0.072	0.923	0.002	0.076	0.308666666667
OmAQP97	39	S	B	0.056	0.878	0.010	0.111	0.336444444444
OmAQP97	40	F	B	0.079	0.831	0.044	0.125	0.369888888889
OmAQP97	41	A	B	0.04	0.660	0.049	0.291	0.406666666667
OmAQP97	42	H	B	0.187	0.455	0.046	0.498	0.445333333333
OmAQP97	43	Y	B	0.2	0.278	0.093	0.628	0.483222222222
OmAQP97	44	I	B	0.226	0.191	0.086	0.723	0.513555555556	B
OmAQP97	45	F	B	0.246	0.113	0.043	0.844	0.542888888889	B
OmAQP97	46	S	E	0.513	0.058	0.017	0.925	0.576	B
OmAQP97	47	G	E	0.604	0.016	0.005	0.979	0.578888888889	B
OmAQP97	48	Q	E	0.483	0.053	0.004	0.942	0.571	B
OmAQP97	49	K	E	0.396	0.109	0.005	0.886	0.550444444444	B
OmAQP97	50	D	E	0.293	0.109	0.005	0.886	0.521888888889	B
OmAQP97	51	V	B	0.136	0.522	0.016	0.462	0.484888888889
OmAQP97	52	L	B	0.133	0.751	0.050	0.199	0.455777777778
OmAQP97	53	A	B	0.134	0.831	0.044	0.125	0.417
OmAQP97	54	V	B	0.078	0.878	0.010	0.111	0.389111111111
OmAQP97	55	T	B	0.079	0.938	0.007	0.055	0.354888888889
OmAQP97	56	F	E	0.251	0.970	0.001	0.029	0.337444444444
OmAQP97	57	C	B	0.15	0.970	0.001	0.029	0.320555555556
OmAQP97	58	W	B	0.229	0.970	0.001	0.029	0.318
OmAQP97	59	G	B	0.205	0.988	0.000	0.012	0.311555555556
OmAQP97	60	M	E	0.29	0.988	0.000	0.012	0.307111111111
OmAQP97	61	G	B	0.153	0.988	0.000	0.012	0.296444444444
OmAQP97	62	V	B	0.166	0.988	0.000	0.012	0.293888888889
OmAQP97	63	M	B	0.161	0.988	0.000	0.012	0.297666666667
OmAQP97	64	L	B	0.208	0.970	0.001	0.029	0.305333333333
OmAQP97	65	G	B	0.105	0.970	0.001	0.029	0.302888888889
OmAQP97	66	I	B	0.09	0.970	0.001	0.029	0.314222222222
OmAQP97	67	Q	B	0.13	0.938	0.007	0.055	0.330555555556
OmAQP97	68	T	B	0.129	0.938	0.007	0.055	0.353
OmAQP97	69	G	B	0.051	0.782	0.003	0.215	0.368444444444
OmAQP97	70	A	B	0.14	0.502	0.002	0.495	0.392888888889
OmAQP97	71	G	B	0.262	0.406	0.004	0.591	0.415222222222
OmAQP97	72	V	B	0.122	0.321	0.003	0.675	0.422111111111
OmAQP97	73	S	B	0.07	0.109	0.005	0.886	0.419777777778
OmAQP97	74	G	B	0.164	0.116	0.016	0.868	0.425888888889
OmAQP97	75	G	B	0.059	0.058	0.017	0.925	0.410888888889
OmAQP97	76	H	B	0.073	0.113	0.043	0.844	0.378444444444
OmAQP97	77	V	B	0.036	0.113	0.043	0.844	0.356
OmAQP97	78	N	B	0.053	0.058	0.017	0.925	0.337555555556
OmAQP97	79	P	B	0.041	0.782	0.003	0.215	0.311222222222
OmAQP97	80	V	B	0.031	0.923	0.002	0.076	0.286333333333
OmAQP97	81	V	B	0.04	0.878	0.010	0.111	0.269111111111
OmAQP97	82	T	B	0.029	0.878	0.010	0.111	0.255444444444
OmAQP97	83	T	B	0.027	0.970	0.001	0.029	0.249888888889
OmAQP97	84	P	B	0.043	0.988	0.000	0.012	0.271333333333
OmAQP97	85	F	B	0.072	0.988	0.000	0.012	0.313111111111
OmAQP97	86	A	B	0.067	0.970	0.001	0.029	0.348111111111
OmAQP97	87	S	B	0.086	0.923	0.002	0.076	0.373777777778
OmAQP97	88	V	B	0.229	0.782	0.003	0.215	0.408888888889
OmAQP97	89	G	E	0.388	0.321	0.003	0.675	0.433888888889
OmAQP97	90	R	E	0.544	0.053	0.004	0.942	0.461555555556
OmAQP97	91	L	B	0.081	0.016	0.005	0.979	0.492666666667
OmAQP97	92	P	E	0.44	0.053	0.004	0.942	0.493888888889
OmAQP97	93	W	B	0.143	0.502	0.002	0.495	0.490777777778
OmAQP97	94	K	E	0.32	0.406	0.004	0.591	0.483777777778
OmAQP97	95	K	B	0.28	0.406	0.004	0.591	0.462333333333
OmAQP97	96	V	B	0.038	0.802	0.014	0.185	0.438666666667
OmAQP97	97	P	B	0.098	0.878	0.010	0.111	0.412
OmAQP97	98	H	B	0.193	0.938	0.007	0.055	0.389333333333
OmAQP97	99	Y	B	0.143	0.975	0.003	0.022	0.365333333333
OmAQP97	100	L	B	0.108	0.970	0.001	0.029	0.351
OmAQP97	101	L	B	0.19	0.970	0.001	0.029	0.354333333333
OmAQP97	102	G	B	0.108	0.970	0.001	0.029	0.338333333333
OmAQP97	103	Q	B	0.114	0.970	0.001	0.029	0.309555555556
OmAQP97	104	H	B	0.19	0.970	0.001	0.029	0.301777777778
OmAQP97	105	L	B	0.214	0.970	0.001	0.029	0.300777777778
OmAQP97	106	G	B	0.108	0.970	0.001	0.029	0.284444444444
OmAQP97	107	A	B	0.077	0.988	0.000	0.012	0.277555555556
OmAQP97	108	F	B	0.191	0.988	0.000	0.012	0.269777777778
OmAQP97	109	L	B	0.175	0.988	0.000	0.012	0.252666666667
OmAQP97	110	A	B	0.047	0.988	0.000	0.012	0.236333333333
OmAQP97	111	S	B	0.079	0.970	0.001	0.029	0.24
OmAQP97	112	A	B	0.161	0.970	0.001	0.029	0.252333333333
OmAQP97	113	I	B	0.093	0.970	0.001	0.029	0.256888888889
OmAQP97	114	L	B	0.036	0.970	0.001	0.029	0.264111111111
OmAQP97	115	Y	B	0.159	0.938	0.007	0.055	0.296111111111
OmAQP97	116	F	B	0.188	0.878	0.010	0.111	0.335777777778
OmAQP97	117	N	B	0.11	0.717	0.014	0.269	0.366555555556
OmAQP97	118	Y	B	0.078	0.502	0.002	0.495	0.385888888889
OmAQP97	119	I	B	0.258	0.502	0.002	0.495	0.430777777778
OmAQP97	120	D	E	0.475	0.600	0.003	0.397	0.46
OmAQP97	121	A	B	0.284	0.600	0.003	0.397	0.483
OmAQP97	122	L	B	0.101	0.694	0.003	0.303	0.518333333333	B
OmAQP97	123	D	E	0.433	0.622	0.015	0.363	0.552555555556	B
OmAQP97	124	H	E	0.52	0.522	0.016	0.462	0.575666666667	B
OmAQP97	125	Y	B	0.193	0.430	0.016	0.555	0.588	B
OmAQP97	126	D	E	0.419	0.257	0.016	0.727	0.606777777778	B
OmAQP97	127	G	E	0.421	0.257	0.016	0.727	0.636111111111	B
OmAQP97	128	G	E	0.377	0.184	0.043	0.773	0.637888888889	B
OmAQP97	129	E	E	0.346	0.184	0.043	0.773	0.641444444444	B
OmAQP97	130	R	E	0.359	0.191	0.086	0.723	0.651111111111	B
OmAQP97	131	Q	B	0.246	0.199	0.152	0.649	0.649	B
OmAQP97	132	I	B	0.236	0.307	0.165	0.527	0.654888888889	B
OmAQP97	133	F	B	0.25	0.191	0.086	0.723	0.640222222222	B
OmAQP97	134	G	E	0.355	0.184	0.043	0.773	0.616888888889	B
OmAQP97	135	D	E	0.348	0.113	0.043	0.844	0.592	B
OmAQP97	136	R	E	0.31	0.113	0.043	0.844	0.567555555556	B
OmAQP97	137	G	B	0.178	0.052	0.084	0.864	0.543666666667	B
OmAQP97	138	T	B	0.177	0.056	0.142	0.802	0.519222222222	B
OmAQP97	139	G	B	0.141	0.018	0.141	0.840	0.487444444444
OmAQP97	140	I	B	0.129	0.018	0.141	0.840	0.456111111111
OmAQP97	141	L	B	0.056	0.022	0.359	0.619	0.429
OmAQP97	142	L	B	0.047	0.021	0.452	0.528	0.419222222222
OmAQP97	143	T	B	0.06	0.021	0.452	0.528	0.431222222222
OmAQP97	144	T	B	0.059	0.021	0.279	0.699	0.446111111111
OmAQP97	145	F	B	0.129	0.018	0.141	0.840	0.461111111111
OmAQP97	146	P	B	0.193	0.018	0.047	0.935	0.476666666667
OmAQP97	147	N	B	0.214	0.018	0.019	0.964	0.482333333333
OmAQP97	148	E	E	0.368	0.058	0.017	0.925	0.493111111111
OmAQP97	149	H	E	0.362	0.181	0.017	0.803	0.491888888889
OmAQP97	150	V	B	0.128	0.181	0.017	0.803	0.477777777778
OmAQP97	151	H	B	0.132	0.257	0.016	0.727	0.450111111111
OmAQP97	152	L	B	0.17	0.782	0.003	0.215	0.416111111111
OmAQP97	153	S	B	0.148	0.782	0.003	0.215	0.376888888889
OmAQP97	154	I	B	0.183	0.782	0.003	0.215	0.342555555556
OmAQP97	155	C	B	0.075	0.859	0.002	0.139	0.310444444444
OmAQP97	156	I	B	0.07	0.970	0.001	0.029	0.297555555556
OmAQP97	157	F	B	0.154	0.970	0.001	0.029	0.281111111111
OmAQP97	158	D	B	0.115	0.988	0.000	0.012	0.266222222222
OmAQP97	159	T	B	0.045	0.988	0.000	0.012	0.255
OmAQP97	160	I	B	0.118	0.988	0.000	0.012	0.257888888889
OmAQP97	161	I	B	0.188	0.988	0.000	0.012	0.258444444444
OmAQP97	162	C	B	0.073	0.970	0.001	0.029	0.259
OmAQP97	163	S	B	0.052	0.970	0.001	0.029	0.248444444444
OmAQP97	164	G	B	0.105	0.988	0.000	0.012	0.243222222222
OmAQP97	165	L	B	0.143	0.975	0.003	0.022	0.225777777778
OmAQP97	166	L	B	0.064	0.975	0.003	0.022	0.211222222222
OmAQP97	167	M	B	0.062	0.975	0.003	0.022	0.215222222222
OmAQP97	168	F	B	0.143	0.950	0.028	0.022	0.223
OmAQP97	169	T	B	0.064	0.870	0.077	0.053	0.224555555556
OmAQP97	170	I	B	0.044	0.807	0.137	0.056	0.231777777778
OmAQP97	171	M	B	0.107	0.662	0.225	0.114	0.255555555556
OmAQP97	172	V	B	0.082	0.594	0.285	0.121	0.300777777778
OmAQP97	173	I	B	0.037	0.373	0.401	0.226	0.352222222222
OmAQP97	174	I	B	0.078	0.252	0.423	0.325	0.410777777778
OmAQP97	175	D	B	0.196	0.118	0.150	0.732	0.472333333333
OmAQP97	176	N	E	0.473	0.053	0.043	0.903	0.527666666667	B
OmAQP97	177	K	E	0.575	0.058	0.017	0.925	0.576444444444	B
OmAQP97	178	N	E	0.478	0.058	0.017	0.925	0.609888888889	B
OmAQP97	179	A	E	0.43	0.058	0.017	0.925	0.646222222222	B
OmAQP97	180	N	E	0.448	0.058	0.017	0.925	0.660444444444	B
OmAQP97	181	T	E	0.322	0.058	0.017	0.925	0.639111111111	B
OmAQP97	182	T	B	0.311	0.058	0.017	0.925	0.624333333333	B
OmAQP97	183	S	E	0.487	0.053	0.004	0.942	0.593222222222	B
OmAQP97	184	G	B	0.273	0.176	0.004	0.820	0.552222222222	B
OmAQP97	185	M	B	0.142	0.502	0.002	0.495	0.498888888889
OmAQP97	186	H	B	0.234	0.694	0.003	0.303	0.454222222222
OmAQP97	187	A	B	0.193	0.859	0.002	0.139	0.417
OmAQP97	188	F	B	0.214	0.938	0.007	0.055	0.377777777778
OmAQP97	189	L	B	0.204	0.975	0.003	0.022	0.341
OmAQP97	190	I	B	0.229	0.975	0.003	0.022	0.319777777778
OmAQP97	191	G	B	0.255	0.988	0.000	0.012	0.291777777778
OmAQP97	192	I	E	0.297	0.988	0.000	0.012	0.266
OmAQP97	193	M	B	0.209	0.988	0.000	0.012	0.248222222222
OmAQP97	194	V	B	0.218	0.988	0.000	0.012	0.244444444444
OmAQP97	195	M	B	0.21	0.988	0.000	0.012	0.248
OmAQP97	196	A	B	0.218	0.988	0.000	0.012	0.253333333333
OmAQP97	197	L	B	0.204	0.970	0.001	0.029	0.259333333333
OmAQP97	198	C	B	0.178	0.970	0.001	0.029	0.261222222222
OmAQP97	199	W	B	0.169	0.923	0.002	0.076	0.283444444444
OmAQP97	200	A	B	0.153	0.923	0.002	0.076	0.303777777778
OmAQP97	201	F	B	0.118	0.859	0.002	0.139	0.321555555556
OmAQP97	202	G	B	0.061	0.694	0.003	0.303	0.336555555556
OmAQP97	203	T	B	0.202	0.694	0.003	0.303	0.349666666667
OmAQP97	204	N	B	0.2	0.600	0.003	0.397	0.352
OmAQP97	205	C	B	0.07	0.321	0.003	0.675	0.364333333333
OmAQP97	206	M	B	0.083	0.246	0.004	0.750	0.372666666667
OmAQP97	207	A	B	0.09	0.116	0.016	0.868	0.382111111111
OmAQP97	208	A	B	0.058	0.116	0.016	0.868	0.365888888889
OmAQP97	209	V	B	0.031	0.181	0.017	0.803	0.355444444444
OmAQP97	210	N	B	0.046	0.181	0.017	0.803	0.356888888889
OmAQP97	211	P	B	0.051	0.522	0.016	0.462	0.349555555556
OmAQP97	212	A	B	0.022	0.600	0.003	0.397	0.339666666667
OmAQP97	213	R	B	0.067	0.694	0.003	0.303	0.334666666667
OmAQP97	214	D	B	0.076	0.782	0.003	0.215	0.326888888889
OmAQP97	215	F	B	0.04	0.923	0.002	0.076	0.308777777778
OmAQP97	216	P	B	0.022	0.923	0.002	0.076	0.293666666667
OmAQP97	217	P	B	0.077	0.970	0.001	0.029	0.288666666667
OmAQP97	218	R	B	0.085	0.970	0.001	0.029	0.276333333333
OmAQP97	219	V	B	0.062	0.923	0.002	0.076	0.275222222222
OmAQP97	220	L	B	0.038	0.938	0.007	0.055	0.289666666667
OmAQP97	221	A	B	0.078	0.878	0.010	0.111	0.310111111111
OmAQP97	222	S	B	0.089	0.802	0.014	0.185	0.335
OmAQP97	223	I	B	0.152	0.660	0.049	0.291	0.364333333333
OmAQP97	224	V	B	0.108	0.455	0.046	0.498	0.401666666667
OmAQP97	225	G	B	0.244	0.268	0.043	0.689	0.441888888889
OmAQP97	226	Y	B	0.163	0.113	0.043	0.844	0.484
OmAQP97	227	G	E	0.403	0.058	0.017	0.925	0.523777777778	B
OmAQP97	228	P	E	0.491	0.116	0.016	0.868	0.547	B
OmAQP97	229	E	E	0.5	0.116	0.016	0.868	0.562222222222	B
OmAQP97	230	V	E	0.329	0.058	0.017	0.925	0.573444444444	B
OmAQP97	231	F	B	0.156	0.018	0.019	0.964	0.570333333333	B
OmAQP97	232	T	E	0.415	0.018	0.019	0.964	0.555555555556	B
OmAQP97	233	Y	E	0.348	0.018	0.019	0.964	0.532888888889	B
OmAQP97	234	R	B	0.158	0.018	0.019	0.964	0.510333333333	B
OmAQP97	235	H	B	0.199	0.018	0.047	0.935	0.476444444444
OmAQP97	236	F	B	0.121	0.125	0.227	0.648	0.437222222222
OmAQP97	237	W	B	0.066	0.252	0.423	0.325	0.403888888889
OmAQP97	238	W	B	0.105	0.478	0.309	0.214	0.374555555556
OmAQP97	239	I	B	0.044	0.725	0.163	0.112	0.331111111111
OmAQP97	240	P	B	0.081	0.831	0.044	0.125	0.302
OmAQP97	241	M	B	0.127	0.870	0.077	0.053	0.291111111111
OmAQP97	242	F	B	0.148	0.831	0.044	0.125	0.277888888889
OmAQP97	243	I	B	0.08	0.802	0.014	0.185	0.267888888889
OmAQP97	244	P	B	0.12	0.859	0.002	0.139	0.265888888889
OmAQP97	245	H	B	0.249	0.970	0.001	0.029	0.275888888889
OmAQP97	246	V	B	0.27	0.970	0.001	0.029	0.282777777778
OmAQP97	247	G	B	0.111	0.970	0.001	0.029	0.279
OmAQP97	248	G	B	0.103	0.988	0.000	0.012	0.293222222222
OmAQP97	249	L	B	0.251	0.988	0.000	0.012	0.310111111111
OmAQP97	250	I	B	0.211	0.988	0.000	0.012	0.312
OmAQP97	251	G	B	0.111	0.988	0.000	0.012	0.319222222222
OmAQP97	252	T	B	0.136	0.988	0.000	0.012	0.323111111111
OmAQP97	253	W	B	0.243	0.970	0.001	0.029	0.331666666667
OmAQP97	254	L	B	0.108	0.988	0.000	0.012	0.321111111111
OmAQP97	255	Y	B	0.098	0.970	0.001	0.029	0.330111111111
OmAQP97	256	V	E	0.296	0.970	0.001	0.029	0.365333333333
OmAQP97	257	L	B	0.176	0.970	0.001	0.029	0.39
OmAQP97	258	A	B	0.051	0.923	0.002	0.076	0.416777777778
OmAQP97	259	I	B	0.123	0.782	0.003	0.215	0.442666666667
OmAQP97	260	E	E	0.326	0.406	0.004	0.591	0.476777777778
OmAQP97	261	M	B	0.198	0.176	0.004	0.820	0.500555555556	B
OmAQP97	262	H	E	0.591	0.058	0.017	0.925	0.532888888889	B
OmAQP97	263	I	B	0.261	0.018	0.019	0.964	0.577888888889	B
OmAQP97	264	V	E	0.491	0.018	0.019	0.964	0.59	B
OmAQP97	265	P	E	0.616	0.018	0.019	0.964	0.604444444444	B
OmAQP97	266	E	E	0.572	0.058	0.017	0.925	0.620111111111	B
OmAQP97	267	R	E	0.569	0.058	0.017	0.925	0.617222222222	B
OmAQP97	268	V	B	0.226	0.116	0.016	0.868	0.625111111111	B
OmAQP97	269	R	E	0.522	0.181	0.017	0.803	0.625333333333	B
OmAQP97	270	D	E	0.597	0.257	0.016	0.727	0.639111111111	B
OmAQP97	271	D	E	0.552	0.339	0.016	0.645	0.644444444444	B
OmAQP97	272	R	E	0.585	0.430	0.016	0.555	0.645888888889	B
OmAQP97	273	T	E	0.467	0.430	0.016	0.555	0.657555555556	B
OmAQP97	274	E	E	0.573	0.455	0.046	0.498	0.649222222222	B
OmAQP97	275	R	E	0.536	0.455	0.046	0.498	0.640666666667	B
OmAQP97	276	E	E	0.496	0.502	0.102	0.396	0.639111111111	B
OmAQP97	277	M	E	0.365	0.278	0.093	0.628	0.631	B
OmAQP97	278	T	E	0.421	0.184	0.043	0.773	0.622666666667	B
OmAQP97	279	N	E	0.648	0.184	0.043	0.773	0.601333333333	B
OmAQP97	280	L	E	0.414	0.113	0.043	0.844	0.589111111111	B
OmAQP97	281	L	E	0.369	0.113	0.087	0.800	0.574111111111	B
OmAQP97	282	P	E	0.652	0.052	0.084	0.864	0.566111111111	B
OmAQP97	283	L	E	0.254	0.053	0.043	0.903	0.562444444444	B
OmAQP97	284	P	E	0.59	0.116	0.016	0.868	0.574111111111	B
OmAQP97	285	P	E	0.674	0.339	0.016	0.645	0.573444444444	B
OmAQP97	286	R	E	0.44	0.339	0.016	0.645	0.574666666667	B
OmAQP97	287	T	E	0.334	0.339	0.016	0.645	0.577	B
OmAQP97	288	E	E	0.626	0.430	0.016	0.555	0.58	B
OmAQP97	289	K	E	0.669	0.339	0.016	0.645	0.514666666667	B
OmAQP97	290	T	E	0.601	0.116	0.016	0.868	0.454
OmAQP97	291	G	E	0.634	0.018	0.019	0.964	0.392666666667
OmAQP97	292	V	E	0.656	0.003	0.003	0.994	0.327111111111

## Sheet: Chou_Fasman (turns)
Position	Residue	Start	End	Peptide	Score
4	P	1	7	MANPPFP	1.14
5	P	2	8	ANPPFPF	1.14
6	F	3	9	NPPFPFM	1131
7	P	4	10	PPFPFMK	1053
8	F	5	11	PFPFMKR	0.971
9	M	6	12	FPFMKRF	0.84
10	K	7	13	PFMKRFV	0.826
11	R	8	14	FMKRFVI	0.676
12	F	9	15	MKRFVIK	0.734
13	V	10	16	KRFVIKS	0.853
14	I	11	17	RFVIKSP	0.926
15	K	12	18	FVIKSPV	0.861
16	S	13	19	VIKSPVL	0.86
17	P	14	20	IKSPVLR	0.924
18	V	15	21	KSPVLRE	0.963
19	L	16	22	SPVLREF	0.904
20	R	17	23	PVLREFL	0.784
21	E	18	24	VLREFLA	0.661
22	F	19	25	LREFLAE	0.696
23	L	20	26	REFLAEF	0.697
24	A	21	27	EFLAEFF	0.647
25	E	22	28	FLAEFFG	0.764
26	F	23	29	LAEFFGT	0.816
27	F	24	30	AEFFGTF	0.817
28	G	25	31	EFFGTFI	0.79
29	T	26	32	FFGTFIL	0.769
30	F	27	33	FGTFILY	0.846
31	I	28	34	GTFILYI	0.827
32	L	29	35	TFILYIF	0.69
33	Y	30	36	FILYIFG	0.776
34	I	31	37	ILYIFGG	0.913
35	F	32	38	LYIFGGA	0.94
36	G	33	39	YIFGGAS	1.06
37	G	34	40	IFGGASF	0.983
38	A	35	41	FGGASFA	1.01
39	S	36	42	GGASFAH	1.06
40	F	37	43	GASFAHY	1.0
41	A	38	44	ASFAHYI	0.844
42	H	39	45	SFAHYIF	0.836
43	Y	40	46	FAHYIFS	0.836
44	I	41	47	AHYIFSG	0.973
45	F	42	48	HYIFSGQ	1019
46	S	43	49	YIFSGQK	1027
47	G	44	50	IFSGQKD	1073
48	Q	45	51	FSGQKDV	1077
49	K	46	52	SGQKDVL	1076
50	D	47	53	GQKDVLA	0.966
51	V	48	54	QKDVLAV	0.814
52	L	49	55	KDVLAVT	0.811
53	A	50	56	DVLAVTF	0.753
54	V	51	57	VLAVTFC	0.714
55	T	52	58	LAVTFCW	0.78
56	F	53	59	AVTFCWG	0.919
57	C	54	60	VTFCWGM	0.91
58	W	55	61	TFCWGMG	1061
59	G	56	62	FCWGMGV	0.996
60	M	57	63	CWGMGVM	0.996
61	G	58	64	WGMGVML	0.91
62	V	59	65	GMGVMLG	0.996
63	M	60	66	MGVMLGI	0.84
64	L	61	67	GVMLGIQ	0.894
65	G	62	68	VMLGIQT	0.809
66	I	63	69	MLGIQTG	0.96
67	Q	64	70	LGIQTGA	0.969
68	T	65	71	GIQTGAG	1107
69	G	66	72	IQTGAGV	0.956
70	A	67	73	QTGAGVS	1093
71	G	68	74	TGAGVSG	1176
72	V	69	75	GAGVSGG	1261
73	S	70	76	AGVSGGH	1174
74	G	71	77	GVSGGHV	1151
75	G	72	78	VSGGHVN	1151
76	H	73	79	SGGHVNP	1297
77	V	74	80	GGHVNPV	1164
78	N	75	81	GHVNPVV	1013
79	P	76	82	HVNPVVT	0.927
80	V	77	83	VNPVVTT	0.929
81	V	78	84	NPVVTTP	1074
82	T	79	85	PVVTTPF	0.937
83	T	80	86	VVTTPFA	0.814
84	P	81	87	VTTPFAS	0.947
85	F	82	88	TTPFASV	0.947
86	A	83	89	TPFASVG	1033
87	S	84	90	PFASVGR	1031
88	V	85	91	FASVGRL	0.899
89	G	86	92	ASVGRLP	1.03
90	R	87	93	SVGRLPW	1073
91	L	88	94	VGRLPWK	1013
92	P	89	95	GRLPWKK	1086
93	W	90	96	RLPWKKV	0.934
94	K	91	97	LPWKKVP	1016
95	K	92	98	PWKKVPH	1067
96	V	93	99	WKKVPHY	1013
97	P	94	100	KKVPHYL	0.96
98	H	95	101	KVPHYLL	0.9
99	Y	96	102	VPHYLLG	0.979
100	L	97	103	PHYLLGQ	1047
101	L	98	104	HYLLGQH	0.966
102	G	99	105	YLLGQHL	0.914
103	Q	100	106	LLGQHLG	0.974
104	H	101	107	LGQHLGA	0.984
105	L	102	108	GQHLGAF	0.986
106	G	103	109	QHLGAFL	0.847
107	A	104	110	HLGAFLA	0.801
108	F	105	111	LGAFLAS	0.87
109	L	106	112	GAFLASA	0.88
110	A	107	113	AFLASAI	0.724
111	S	108	114	FLASAIL	0.714
112	A	109	115	LASAILY	0.791
113	I	110	116	ASAILYF	0.793
114	L	111	117	SAILYFN	0.921
115	Y	112	118	AILYFNY	0.88
116	F	113	119	ILYFNYI	0.853
117	N	114	120	LYFNYID	0.994
118	Y	115	121	YFNYIDA	1004
119	I	116	122	FNYIDAL	0.926
120	D	117	123	NYIDALD	1049
121	A	118	124	YIDALDH	0.961
122	L	119	125	IDALDHY	0.961
123	D	120	126	DALDHYD	1103
124	H	121	127	ALDHYDG	1117
125	Y	122	128	LDHYDGG	1246
126	D	123	129	DHYDGGE	1267
127	G	124	130	HYDGGER	1194
128	G	125	131	YDGGERQ	1199
129	E	126	132	DGGERQI	1103
130	R	127	133	GGERQIF	0.98
131	Q	128	134	GERQIFG	0.98
132	I	129	135	ERQIFGD	0.966
133	F	130	136	RQIFGDR	0.996
134	G	131	137	QIFGDRG	1083
135	D	132	138	IFGDRGT	1.08
136	R	133	139	FGDRGTG	1236
137	G	134	140	GDRGTGI	1217
138	T	135	141	DRGTGIL	1079
139	G	136	142	RGTGILL	0.954
140	I	137	143	GTGILLT	0.956
141	L	138	144	TGILLTT	0.87
142	L	139	145	GILLTTF	0.819
143	T	140	146	ILLTTFP	0.813
144	T	141	147	LLTTFPN	0.969
145	F	142	148	LTTFPNE	0.99
146	P	143	149	TTFPNEH	1041
147	N	144	150	TFPNEHV	0.976
148	E	145	151	FPNEHVH	0.974
149	H	146	152	PNEHVHL	0.973
150	V	147	153	NEHVHLS	0.96
151	H	148	154	EHVHLSI	0.804
152	L	149	155	HVHLSIC	0.869
153	S	150	156	VHLSICI	0.8
154	I	151	157	HLSICIF	0.814
155	C	152	158	LSICIFD	0.887
156	I	153	159	SICIFDT	0.94
157	F	154	160	ICIFDTI	0.803
158	D	155	161	CIFDTII	0.803
159	T	156	162	IFDTIIC	0.803
160	I	157	163	FDTIICS	0.94
161	I	158	164	DTIICSG	1077
162	C	159	165	TIICSGL	0.953
163	S	160	166	IICSGLL	0.9
164	G	161	167	ICSGLLM	0.919
165	L	162	168	CSGLLMF	0.937
166	L	163	169	SGLLMFT	0.904
167	M	164	170	GLLMFTI	0.767
168	F	165	171	LLMFTIM	0.63
169	T	166	172	LMFTIMV	0.617
170	I	167	173	MFTIMVI	0.6
171	M	168	174	FTIMVII	0.581
172	V	169	175	TIMVIID	0.704
173	I	170	176	IMVIIDN	0.79
174	I	171	177	MVIIDNK	0.867
175	D	172	178	VIIDNKN	1004
176	N	173	179	IIDNKNA	1027
177	K	174	180	IDNKNAN	1183
178	N	175	181	DNKNANT	1253
179	A	176	182	NKNANTT	1181
180	N	177	183	KNANTTS	1163
181	T	178	184	NANTTSG	1241
182	T	179	185	ANTTSGM	1104
183	S	180	186	NTTSGMH	1146
184	G	181	187	TTSGMHA	1017
185	M	182	188	TSGMHAF	0.966
186	H	183	189	SGMHAFL	0.913
187	A	184	190	GMHAFLI	0.776
188	F	185	191	MHAFLIG	0.776
189	L	186	192	HAFLIGI	0.757
190	I	187	193	AFLIGIM	0.707
191	G	188	194	FLIGIMV	0.684
192	I	189	195	LIGIMVM	0.684
193	M	190	196	IGIMVMA	0.694
194	V	191	197	GIMVMAL	0.711
195	M	192	198	IMVMALC	0.659
196	A	193	199	MVMALCW	0.729
197	L	194	200	VMALCWA	0.737
198	C	195	201	MALCWAF	0.751
199	W	196	202	ALCWAFG	0.889
200	A	197	203	LCWAFGT	0.931
201	F	198	204	CWAFGTN	1.07
202	G	199	205	WAFGTNC	1.07
203	T	200	206	AFGTNCM	1019
204	N	201	207	FGTNCMA	1019
205	C	202	208	GTNCMAA	1027
206	M	203	209	TNCMAAV	0.876
207	A	204	210	NCMAAVN	0.961
208	A	205	211	CMAAVNP	0.956
209	V	206	212	MAAVNPA	0.88
210	N	207	213	AAVNPAR	0.93
211	P	208	214	AVNPARD	1044
212	A	209	215	VNPARDF	1036
213	R	210	216	NPARDFP	1181
214	D	211	217	PARDFPP	1176
215	F	212	218	ARDFPPR	1094
216	P	213	219	RDFPPRV	1071
217	P	214	220	DFPPRVL	1.02
218	R	215	221	FPPRVLA	0.906
219	V	216	222	PPRVLAS	1024
220	L	217	223	PRVLASI	0.874
221	A	218	224	RVLASIV	0.729
222	S	219	225	VLASIVG	0.816
223	I	220	226	LASIVGY	0.907
224	V	221	227	ASIVGYG	1046
225	G	222	228	SIVGYGP	1169
226	Y	223	229	IVGYGPE	1.07
227	G	224	230	VGYGPEV	1074
228	P	225	231	GYGPEVF	1089
229	E	226	232	YGPEVFT	1003
230	V	227	233	GPEVFTY	1003
231	F	228	234	PEVFTYR	0.916
232	T	229	235	EVFTYRH	0.834
233	Y	230	236	VFTYRHF	0.814
234	R	231	237	FTYRHFW	0.88
235	H	232	238	TYRHFWW	0.931
236	F	233	239	YRHFWWI	0.861
237	W	234	240	RHFWWIP	0.916
238	W	235	241	HFWWIPM	0.866
239	I	236	242	FWWIPMF	0.816
240	P	237	243	WWIPMFI	0.797
241	M	238	244	WIPMFIP	0.877
242	F	239	245	IPMFIPH	0.876
243	I	240	246	PMFIPHV	0.88
244	P	241	247	MFIPHVG	0.886
245	H	242	248	FIPHVGG	1023
246	V	243	249	IPHVGGL	1021
247	G	244	250	PHVGGLI	1021
248	G	245	251	HVGGLIG	1027
249	L	246	252	VGGLIGT	1029
250	I	247	253	GGLIGTW	1094
251	G	248	254	GLIGTWL	0.956
252	T	249	255	LIGTWLY	0.896
253	W	250	256	IGTWLYV	0.883
254	L	251	257	GTWLYVL	0.9
255	Y	252	258	TWLYVLA	0.771
256	V	253	259	WLYVLAI	0.701
257	L	254	260	LYVLAIE	0.67
258	A	255	261	YVLAIEM	0.671
259	I	256	262	VLAIEMH	0.644
260	E	257	263	LAIEMHI	0.64
261	M	258	264	AIEMHIV	0.627
262	H	259	265	IEMHIVP	0.75
263	I	260	266	EMHIVPE	0.789
264	V	261	267	MHIVPER	0.819
265	P	262	268	HIVPERV	0.804
266	E	263	269	IVPERVR	0.804
267	R	264	270	VPERVRD	0.946
268	V	265	271	PERVRDD	1083
269	R	266	272	ERVRDDR	1001
270	D	267	273	RVRDDRT	1033
271	D	268	274	VRDDRTE	1003
272	R	269	275	RDDRTER	1067
273	T	270	276	DDRTERE	1037
274	E	271	277	DRTEREM	0.914
275	R	272	278	RTEREMT	0.843
276	E	273	279	TEREMTN	0.93
277	M	274	280	EREMTNL	0.877
278	T	275	281	REMTNLL	0.856
279	N	276	282	EMTNLLP	0.937
280	L	277	283	MTNLLPL	0.916
281	L	278	284	TNLLPLP	1047
282	P	279	285	NLLPLPP	1127
283	L	280	286	LLPLPPR	1.04
284	P	281	287	LPLPPRT	1093
285	P	282	288	PLPPRTE	1114
286	R	283	289	LPPRTEK	1041
287	T	284	290	PPRTEKT	1094
288	E	285	291	PRTEKTG	1.1
289	K	286	292	RTEKTGV	0.954

## Sheet: Karplus (flex.)
Position	Residue	Start	End	Peptide	Score
4	P	1	7	MANPPFP	1008
5	P	2	8	ANPPFPF	1002
6	F	3	9	NPPFPFM	0.973
7	P	4	10	PPFPFMK	0.955
8	F	5	11	PFPFMKR	0.948
9	M	6	12	FPFMKRF	0.95
10	K	7	13	PFMKRFV	0.968
11	R	8	14	FMKRFVI	0.966
12	F	9	15	MKRFVIK	0.96
13	V	10	16	KRFVIKS	0.971
14	I	11	17	RFVIKSP	0.989
15	K	12	18	FVIKSPV	1022
16	S	13	19	VIKSPVL	1043
17	P	14	20	IKSPVLR	1.04
18	V	15	21	KSPVLRE	1022
19	L	16	22	SPVLREF	1002
20	R	17	23	PVLREFL	0.987
21	E	18	24	VLREFLA	0.975
22	F	19	25	LREFLAE	0.96
23	L	20	26	REFLAEF	0.946
24	A	21	27	EFLAEFF	0.934
25	E	22	28	FLAEFFG	0.933
26	F	23	29	LAEFFGT	0.946
27	F	24	30	AEFFGTF	0.959
28	G	25	31	EFFGTFI	0.969
29	T	26	32	FFGTFIL	0.967
30	F	27	33	FGTFILY	0.943
31	I	28	34	GTFILYI	0.917
32	L	29	35	TFILYIF	0.896
33	Y	30	36	FILYIFG	0.891
34	I	31	37	ILYIFGG	0.911
35	F	32	38	LYIFGGA	0.944
36	G	33	39	YIFGGAS	0.976
37	G	34	40	IFGGASF	0.992
38	A	35	41	FGGASFA	0.986
39	S	36	42	GGASFAH	0.96
40	F	37	43	GASFAHY	0.928
41	A	38	44	ASFAHYI	0.901
42	H	39	45	SFAHYIF	0.885
43	Y	40	46	FAHYIFS	0.888
44	I	41	47	AHYIFSG	0.916
45	F	42	48	HYIFSGQ	0.964
46	S	43	49	YIFSGQK	1022
47	G	44	50	IFSGQKD	1074
48	Q	45	51	FSGQKDV	1092
49	K	46	52	SGQKDVL	1078
50	D	47	53	GQKDVLA	1039
51	V	48	54	QKDVLAV	0.988
52	L	49	55	KDVLAVT	0.95
53	A	50	56	DVLAVTF	0.927
54	V	51	57	VLAVTFC	0.919
55	T	52	58	LAVTFCW	0.92
56	F	53	59	AVTFCWG	0.92
57	C	54	60	VTFCWGM	0.923
58	W	55	61	TFCWGMG	0.924
59	G	56	62	FCWGMGV	0.926
60	M	57	63	CWGMGVM	0.921
61	G	58	64	WGMGVML	0.915
62	V	59	65	GMGVMLG	0.909
63	M	60	66	MGVMLGI	0.908
64	L	61	67	GVMLGIQ	0.927
65	G	62	68	VMLGIQT	0.953
66	I	63	69	MLGIQTG	0.986
67	Q	64	70	LGIQTGA	1017
68	T	65	71	GIQTGAG	1027
69	G	66	72	IQTGAGV	1025
70	A	67	73	QTGAGVS	1015
71	G	68	74	TGAGVSG	1.01
72	V	69	75	GAGVSGG	1018
73	S	70	76	AGVSGGH	1.03
74	G	71	77	GVSGGHV	1035
75	G	72	78	VSGGHVN	1024
76	H	73	79	SGGHVNP	1009
77	V	74	80	GGHVNPV	0.994
78	N	75	81	GHVNPVV	0.987
79	P	76	82	HVNPVVT	0.991
80	V	77	83	VNPVVTT	0.991
81	V	78	84	NPVVTTP	1003
82	T	79	85	PVVTTPF	1014
83	T	80	86	VVTTPFA	1016
84	P	81	87	VTTPFAS	1009
85	F	82	88	TTPFASV	0.985
86	A	83	89	TPFASVG	0.971
87	S	84	90	PFASVGR	0.969
88	V	85	91	FASVGRL	0.978
89	G	86	92	ASVGRLP	0.991
90	R	87	93	SVGRLPW	0.988
91	L	88	94	VGRLPWK	0.984
92	P	89	95	GRLPWKK	0.984
93	W	90	96	RLPWKKV	0.991
94	K	91	97	LPWKKVP	1005
95	K	92	98	PWKKVPH	1007
96	V	93	99	WKKVPHY	0.988
97	P	94	100	KKVPHYL	0.961
98	H	95	101	KVPHYLL	0.935
99	Y	96	102	VPHYLLG	0.924
100	L	97	103	PHYLLGQ	0.939
101	L	98	104	HYLLGQH	0.96
102	G	99	105	YLLGQHL	0.98
103	Q	100	106	LLGQHLG	0.986
104	H	101	107	LGQHLGA	0.976
105	L	102	108	GQHLGAF	0.961
106	G	103	109	QHLGAFL	0.943
107	A	104	110	HLGAFLA	0.935
108	F	105	111	LGAFLAS	0.93
109	L	106	112	GAFLASA	0.929
110	A	107	113	AFLASAI	0.928
111	S	108	114	FLASAIL	0.924
112	A	109	115	LASAILY	0.916
113	I	110	116	ASAILYF	0.904
114	L	111	117	SAILYFN	0.899
115	Y	112	118	AILYFNY	0.895
116	F	113	119	ILYFNYI	0.901
117	N	114	120	LYFNYID	0.91
118	Y	115	121	YFNYIDA	0.916
119	I	116	122	FNYIDAL	0.924
120	D	117	123	NYIDALD	0.93
121	A	118	124	YIDALDH	0.937
122	L	119	125	IDALDHY	0.942
123	D	120	126	DALDHYD	0.953
124	H	121	127	ALDHYDG	0.974
125	Y	122	128	LDHYDGG	1006
126	D	123	129	DHYDGGE	1049
127	G	124	130	HYDGGER	1081
128	G	125	131	YDGGERQ	1093
129	E	126	132	DGGERQI	1077
130	R	127	133	GGERQIF	1.04
131	Q	128	134	GERQIFG	1006
132	I	129	135	ERQIFGD	0.98
133	F	130	136	RQIFGDR	0.978
134	G	131	137	QIFGDRG	1002
135	D	132	138	IFGDRGT	1028
136	R	133	139	FGDRGTG	1054
137	G	134	140	GDRGTGI	1062
138	T	135	141	DRGTGIL	1041
139	G	136	142	RGTGILL	1012
140	I	137	143	GTGILLT	0.982
141	L	138	144	TGILLTT	0.972
142	L	139	145	GILLTTF	0.976
143	T	140	146	ILLTTFP	0.995
144	T	141	147	LLTTFPN	1017
145	F	142	148	LTTFPNE	1029
146	P	143	149	TTFPNEH	1041
147	N	144	150	TFPNEHV	1035
148	E	145	151	FPNEHVH	1011
149	H	146	152	PNEHVHL	0.983
150	V	147	153	NEHVHLS	0.952
151	H	148	154	EHVHLSI	0.93
152	L	149	155	HVHLSIC	0.924
153	S	150	156	VHLSICI	0.917
154	I	151	157	HLSICIF	0.912
155	C	152	158	LSICIFD	0.919
156	I	153	159	SICIFDT	0.933
157	F	154	160	ICIFDTI	0.954
158	D	155	161	CIFDTII	0.973
159	T	156	162	IFDTIIC	0.967
160	I	157	163	FDTIICS	0.952
161	I	158	164	DTIICSG	0.945
162	C	159	165	TIICSGL	0.947
163	S	160	166	IICSGLL	0.964
164	G	161	167	ICSGLLM	0.967
165	L	162	168	CSGLLMF	0.952
166	L	163	169	SGLLMFT	0.929
167	M	164	170	GLLMFTI	0.902
168	F	165	171	LLMFTIM	0.891
169	T	166	172	LMFTIMV	0.887
170	I	167	173	MFTIMVI	0.882
171	M	168	174	FTIMVII	0.878
172	V	169	175	TIMVIID	0.892
173	I	170	176	IMVIIDN	0.919
174	I	171	177	MVIIDNK	0.963
175	D	172	178	VIIDNKN	1014
176	N	173	179	IIDNKNA	1045
177	K	174	180	IDNKNAN	1056
178	N	175	181	DNKNANT	1052
179	A	176	182	NKNANTT	1045
180	N	177	183	KNANTTS	1049
181	T	178	184	NANTTSG	1062
182	T	179	185	ANTTSGM	1064
183	S	180	186	NTTSGMH	1049
184	G	181	187	TTSGMHA	1.01
185	M	182	188	TSGMHAF	0.96
186	H	183	189	SGMHAFL	0.927
187	A	184	190	GMHAFLI	0.906
188	F	185	191	MHAFLIG	0.903
189	L	186	192	HAFLIGI	0.907
190	I	187	193	AFLIGIM	0.901
191	G	188	194	FLIGIMV	0.895
192	I	189	195	LIGIMVM	0.88
193	M	190	196	IGIMVMA	0.867
194	V	191	197	GIMVMAL	0.868
195	M	192	198	IMVMALC	0.869
196	A	193	199	MVMALCW	0.877
197	L	194	200	VMALCWA	0.885
198	C	195	201	MALCWAF	0.885
199	W	196	202	ALCWAFG	0.891
200	A	197	203	LCWAFGT	0.915
201	F	198	204	CWAFGTN	0.946
202	G	199	205	WAFGTNC	0.975
203	T	200	206	AFGTNCM	0.982
204	N	201	207	FGTNCMA	0.961
205	C	202	208	GTNCMAA	0.925
206	M	203	209	TNCMAAV	0.895
207	A	204	210	NCMAAVN	0.892
208	A	205	211	CMAAVNP	0.913
209	V	206	212	MAAVNPA	0.95
210	N	207	213	AAVNPAR	0.99
211	P	208	214	AVNPARD	1023
212	A	209	215	VNPARDF	1034
213	R	210	216	NPARDFP	1039
214	D	211	217	PARDFPP	1039
215	F	212	218	ARDFPPR	1.03
216	P	213	219	RDFPPRV	1.03
217	P	214	220	DFPPRVL	1018
218	R	215	221	FPPRVLA	0.997
219	V	216	222	PPRVLAS	0.973
220	L	217	223	PRVLASI	0.947
221	A	218	224	RVLASIV	0.932
222	S	219	225	VLASIVG	0.922
223	I	220	226	LASIVGY	0.921
224	V	221	227	ASIVGYG	0.932
225	G	222	228	SIVGYGP	0.95
226	Y	223	229	IVGYGPE	0.977
227	G	224	230	VGYGPEV	0.999
228	P	225	231	GYGPEVF	1004
229	E	226	232	YGPEVFT	0.993
230	V	227	233	GPEVFTY	0.971
231	F	228	234	PEVFTYR	0.949
232	T	229	235	EVFTYRH	0.937
233	Y	230	236	VFTYRHF	0.932
234	R	231	237	FTYRHFW	0.922
235	H	232	238	TYRHFWW	0.907
236	F	233	239	YRHFWWI	0.886
237	W	234	240	RHFWWIP	0.868
238	W	235	241	HFWWIPM	0.863
239	I	236	242	FWWIPMF	0.871
240	P	237	243	WWIPMFI	0.882
241	M	238	244	WIPMFIP	0.893
242	F	239	245	IPMFIPH	0.906
243	I	240	246	PMFIPHV	0.912
244	P	241	247	MFIPHVG	0.928
245	H	242	248	FIPHVGG	0.951
246	V	243	249	IPHVGGL	0.968
247	G	244	250	PHVGGLI	0.983
248	G	245	251	HVGGLIG	0.988
249	L	246	252	VGGLIGT	0.987
250	I	247	253	GGLIGTW	0.983
251	G	248	254	GLIGTWL	0.982
252	T	249	255	LIGTWLY	0.969
253	W	250	256	IGTWLYV	0.947
254	L	251	257	GTWLYVL	0.927
255	Y	252	258	TWLYVLA	0.904
256	V	253	259	WLYVLAI	0.898
257	L	254	260	LYVLAIE	0.901
258	A	255	261	YVLAIEM	0.9
259	I	256	262	VLAIEMH	0.901
260	E	257	263	LAIEMHI	0.897
261	M	258	264	AIEMHIV	0.892
262	H	259	265	IEMHIVP	0.905
263	I	260	266	EMHIVPE	0.929
264	V	261	267	MHIVPER	0.965
265	P	262	268	HIVPERV	1005
266	E	263	269	IVPERVR	1027
267	R	264	270	VPERVRD	1033
268	V	265	271	PERVRDD	1029
269	R	266	272	ERVRDDR	1026
270	D	267	273	RVRDDRT	1028
271	D	268	274	VRDDRTE	1039
272	R	269	275	RDDRTER	1049
273	T	270	276	DDRTERE	1056
274	E	271	277	DRTEREM	1052
275	R	272	278	RTEREMT	1042
276	E	273	279	TEREMTN	1029
277	M	274	280	EREMTNL	1012
278	T	275	281	REMTNLL	1004
279	N	276	282	EMTNLLP	0.99
280	L	277	283	MTNLLPL	0.977
281	L	278	284	TNLLPLP	0.975
282	P	279	285	NLLPLPP	0.979
283	L	280	286	LLPLPPR	0.997
284	P	281	287	LPLPPRT	1024
285	P	282	288	PLPPRTE	1043
286	R	283	289	LPPRTEK	1.06
287	T	284	290	PPRTEKT	1071
288	E	285	291	PRTEKTG	1075

## Sheet: Parker (hidroph.)
Position	Residue	Start	End	Peptide	Score
4	P	1	7	MANPPFP	0.286
5	P	2	8	ANPPFPF	-0.429
6	F	3	9	NPPFPFM	-1329
7	P	4	10	PPFPFMK	-1514
8	F	5	11	PFPFMKR	-1214
9	M	6	12	FPFMKRF	-2829
10	K	7	13	PFMKRFV	-2043
11	R	8	14	FMKRFVI	-3486
12	F	9	15	MKRFVIK	-1357
13	V	10	16	KRFVIKS	0.171
14	I	11	17	RFVIKSP	-0.343
15	K	12	18	FVIKSPV	-1471
16	S	13	19	VIKSPVL	-1471
17	P	14	20	IKSPVLR	-0.343
18	V	15	21	KSPVLRE	1914
19	L	16	22	SPVLREF	-0.214
20	R	17	23	PVLREFL	-2457
21	E	18	24	VLREFLA	-2457
22	F	19	25	LREFLAE	-0.814
23	L	20	26	REFLAEF	-0.814
24	A	21	27	EFLAEFF	-2729
25	E	22	28	FLAEFFG	-3029
26	F	23	29	LAEFFGT	-0.971
27	F	24	30	AEFFGTF	-0.971
28	G	25	31	EFFGTFI	-2414
29	T	26	32	FFGTFIL	-4843
30	F	27	33	FGTFILY	-3.8
31	I	28	34	GTFILYI	-3629
32	L	29	35	TFILYIF	-5757
33	Y	30	36	FILYIFG	-5686
34	I	31	37	ILYIFGG	-3557
35	F	32	38	LYIFGGA	-2114
36	G	33	39	YIFGGAS	0.129
37	G	34	40	IFGGASF	-0.914
38	A	35	41	FGGASFA	0.529
39	S	36	42	GGASFAH	2143
40	F	37	43	GASFAHY	1057
41	A	38	44	ASFAHYI	-0.9
42	H	39	45	SFAHYIF	-2514
43	Y	40	46	FAHYIFS	-2514
44	I	41	47	AHYIFSG	-0.386
45	F	42	48	HYIFSGQ	0.171
46	S	43	49	YIFSGQK	0.686
47	G	44	50	IFSGQKD	2386
48	Q	45	51	FSGQKDV	3.0
49	K	46	52	SGQKDVL	3.0
50	D	47	53	GQKDVLA	2371
51	V	48	54	QKDVLAV	1029
52	L	49	55	KDVLAVT	0.914
53	A	50	56	DVLAVTF	-1214
54	V	51	57	VLAVTFC	-2443
55	T	52	58	LAVTFCW	-3343
56	F	53	59	AVTFCWG	-1214
57	C	54	60	VTFCWGM	-2114
58	W	55	61	TFCWGMG	-0.771
59	G	56	62	FCWGMGV	-2043
60	M	57	63	CWGMGVM	-1329
61	G	58	64	WGMGVML	-2843
62	V	59	65	GMGVMLG	-0.6
63	M	60	66	MGVMLGI	-2557
64	L	61	67	GVMLGIQ	-1.1
65	G	62	68	VMLGIQT	-1171
66	I	63	69	MLGIQTG	0.171
67	Q	64	70	LGIQTGA	1071
68	T	65	71	GIQTGAG	3.2
69	G	66	72	IQTGAGV	1857
70	A	67	73	QTGAGVS	3929
71	G	68	74	TGAGVSG	3886
72	V	69	75	GAGVSGG	3957
73	S	70	76	AGVSGGH	3443
74	G	71	77	GVSGGHV	2614
75	G	72	78	VSGGHVN	2.8
76	H	73	79	SGGHVNP	3629
77	V	74	80	GGHVNPV	2171
78	N	75	81	GHVNPVV	0.829
79	P	76	82	HVNPVVT	0.757
80	V	77	83	VNPVVTT	1.2
81	V	78	84	NPVVTTP	2029
82	T	79	85	PVVTTPF	-0.286
83	T	80	86	VVTTPFA	-0.286
84	P	81	87	VTTPFAS	1171
85	F	82	88	TTPFASV	1171
86	A	83	89	TPFASVG	1243
87	S	84	90	PFASVGR	1.1
88	V	85	91	FASVGRL	-0.514
89	G	86	92	ASVGRLP	1.1
90	R	87	93	SVGRLPW	-0.629
91	L	88	94	VGRLPWK	-0.743
92	P	89	95	GRLPWKK	0.6
93	W	90	96	RLPWKKV	-0.743
94	K	91	97	LPWKKVP	-1043
95	K	92	98	PWKKVPH	0.571
96	V	93	99	WKKVPHY	0.0
97	P	94	100	KKVPHYL	0.114
98	H	95	101	KVPHYLL	-2014
99	Y	96	102	VPHYLLG	-2014
100	L	97	103	PHYLLGQ	-0.629
101	L	98	104	HYLLGQH	-0.629
102	G	99	105	YLLGQHL	-2243
103	Q	100	106	LLGQHLG	-1157
104	H	101	107	LGQHLGA	0.457
105	L	102	108	GQHLGAF	0.457
106	G	103	109	QHLGAFL	-1671
107	A	104	110	HLGAFLA	-2229
108	F	105	111	LGAFLAS	-1.6
109	L	106	112	GAFLASA	0.014
110	A	107	113	AFLASAI	-1943
111	S	108	114	FLASAIL	-3557
112	A	109	115	LASAILY	-2514
113	I	110	116	ASAILYF	-2514
114	L	111	117	SAILYFN	-1814
115	Y	112	118	AILYFNY	-3014
116	F	113	119	ILYFNYI	-4457
117	N	114	120	LYFNYID	-1886
118	Y	115	121	YFNYIDA	-0.271
119	I	116	122	FNYIDAL	-1314
120	D	117	123	NYIDALD	1429
121	A	118	124	YIDALDH	0.729
122	L	119	125	IDALDHY	0.729
123	D	120	126	DALDHYD	3.3
124	H	121	127	ALDHYDG	2686
125	Y	122	128	LDHYDGG	3.2
126	D	123	129	DHYDGGE	5629
127	G	124	130	HYDGGER	4.8
128	G	125	131	YDGGERQ	5357
129	E	126	132	DGGERQI	4486
130	R	127	133	GGERQIF	1743
131	Q	128	134	GERQIFG	1743
132	I	129	135	ERQIFGD	2357
133	F	130	136	RQIFGDR	1843
134	G	131	137	QIFGDRG	2057
135	D	132	138	IFGDRGT	1943
136	R	133	139	FGDRGTG	3.9
137	G	134	140	GDRGTGI	4071
138	T	135	141	DRGTGIL	1943
139	G	136	142	RGTGILL	-0.8
140	I	137	143	GTGILLT	-0.657
141	L	138	144	TGILLTT	-0.729
142	L	139	145	GILLTTF	-2786
143	T	140	146	ILLTTFP	-3.3
144	T	141	147	LLTTFPN	-1157
145	F	142	148	LTTFPNE	1271
146	P	143	149	TTFPNEH	2886
147	N	144	150	TFPNEHV	1614
148	E	145	151	FPNEHVH	1171
149	H	146	152	PNEHVHL	1171
150	V	147	153	NEHVHLS	1.8
151	H	148	154	EHVHLSI	-0.343
152	L	149	155	HVHLSIC	-1257
153	S	150	156	VHLSICI	-2.7
154	I	151	157	HLSICIF	-3486
155	C	152	158	LSICIFD	-2357
156	I	153	159	SICIFDT	-0.3
157	F	154	160	ICIFDTI	-2371
158	D	155	161	CIFDTII	-2371
159	T	156	162	IFDTIIC	-2371
160	I	157	163	FDTIICS	-0.3
161	I	158	164	DTIICSG	1829
162	C	159	165	TIICSGL	-0.914
163	S	160	166	IICSGLL	-2971
164	G	161	167	ICSGLLM	-2429
165	L	162	168	CSGLLMF	-2.6
166	L	163	169	SGLLMFT	-2057
167	M	164	170	GLLMFTI	-4129
168	F	165	171	LLMFTIM	-5543
169	T	166	172	LMFTIMV	-4757
170	I	167	173	MFTIMVI	-4586
171	M	168	174	FTIMVII	-5129
172	V	169	175	TIMVIID	-2386
173	I	170	176	IMVIIDN	-2129
174	I	171	177	MVIIDNK	-0.171
175	D	172	178	VIIDNKN	1429
176	N	173	179	IIDNKNA	2257
177	K	174	180	IDNKNAN	4.4
178	N	175	181	DNKNANT	6286
179	A	176	182	NKNANTT	5.6
180	N	177	183	KNANTTS	5529
181	T	178	184	NANTTSG	5529
182	T	179	185	ANTTSGM	3929
183	S	180	186	NTTSGMH	3929
184	G	181	187	TTSGMHA	3229
185	M	182	188	TSGMHAF	1171
186	H	183	189	SGMHAFL	-0.886
187	A	184	190	GMHAFLI	-2957
188	F	185	191	MHAFLIG	-2957
189	L	186	192	HAFLIGI	-3.5
190	I	187	193	AFLIGIM	-4.4
191	G	188	194	FLIGIMV	-5229
192	I	189	195	LIGIMVM	-4514
193	M	190	196	IGIMVMA	-2.9
194	V	191	197	GIMVMAL	-3071
195	M	192	198	IMVMALC	-3686
196	A	193	199	MVMALCW	-3971
197	L	194	200	VMALCWA	-3071
198	C	195	201	MALCWAF	-3857
199	W	196	202	ALCWAFG	-2443
200	A	197	203	LCWAFGT	-2.0
201	F	198	204	CWAFGTN	0.314
202	G	199	205	WAFGTNC	0.314
203	T	200	206	AFGTNCM	1143
204	N	201	207	FGTNCMA	1143
205	C	202	208	GTNCMAA	2757
206	M	203	209	TNCMAAV	1414
207	A	204	210	NCMAAVN	1671
208	A	205	211	CMAAVNP	0.971
209	V	206	212	MAAVNPA	1071
210	N	207	213	AAVNPAR	2271
211	P	208	214	AVNPARD	3.4
212	A	209	215	VNPARDF	1786
213	R	210	216	NPARDFP	2614
214	D	211	217	PARDFPP	1914
215	F	212	218	ARDFPPR	2214
216	P	213	219	RDFPPRV	1386
217	P	214	220	DFPPRVL	-0.529
218	R	215	221	FPPRVLA	-1657
219	V	216	222	PPRVLAS	0.586
220	L	217	223	PRVLASI	-0.857
221	A	218	224	RVLASIV	-1686
222	S	219	225	VLASIVG	-1471
223	I	220	226	LASIVGY	-1214
224	V	221	227	ASIVGYG	0.914
225	G	222	228	SIVGYGP	0.914
226	Y	223	229	IVGYGPE	1.1
227	G	224	230	VGYGPEV	1714
228	P	225	231	GYGPEVF	0.929
229	E	226	232	YGPEVFT	0.857
230	V	227	233	GPEVFTY	0.857
231	F	228	234	PEVFTYR	0.643
232	T	229	235	EVFTYRH	0.643
233	Y	230	236	VFTYRHF	-1786
234	R	231	237	FTYRHFW	-2686
235	H	232	238	TYRHFWW	-2.8
236	F	233	239	YRHFWWI	-4686
237	W	234	240	RHFWWIP	-4114
238	W	235	241	HFWWIPM	-5314
239	I	236	242	FWWIPMF	-6929
240	P	237	243	WWIPMFI	-6757
241	M	238	244	WIPMFIP	-5029
242	F	239	245	IPMFIPH	-3.3
243	I	240	246	PMFIPHV	-2686
244	P	241	247	MFIPHVG	-2171
245	H	242	248	FIPHVGG	-0.757
246	V	243	249	IPHVGGL	-0.757
247	G	244	250	PHVGGLI	-0.757
248	G	245	251	HVGGLIG	-0.243
249	L	246	252	VGGLIGT	0.2
250	I	247	253	GGLIGTW	-0.7
251	G	248	254	GLIGTWL	-2829
252	T	249	255	LIGTWLY	-3914
253	W	250	256	IGTWLYV	-3129
254	L	251	257	GTWLYVL	-3.3
255	Y	252	258	TWLYVLA	-3814
256	V	253	259	WLYVLAI	-5.7
257	L	254	260	LYVLAIE	-3157
258	A	255	261	YVLAIEM	-2443
259	I	256	262	VLAIEMH	-1871
260	E	257	263	LAIEMHI	-2486
261	M	258	264	AIEMHIV	-1.7
262	H	259	265	IEMHIVP	-1.7
263	I	260	266	EMHIVPE	0.557
264	V	261	267	MHIVPER	0.043
265	P	262	268	HIVPERV	0.114
266	E	263	269	IVPERVR	0.414
267	R	264	270	VPERVRD	2986
268	V	265	271	PERVRDD	4943
269	R	266	272	ERVRDDR	5243
270	D	267	273	RVRDDRT	4871
271	D	268	274	VRDDRTE	5386
272	R	269	275	RDDRTER	6514
273	T	270	276	DDRTERE	7029
274	E	271	277	DRTEREM	5.0
275	R	272	278	RTEREMT	4314
276	E	273	279	TEREMTN	4714
277	M	274	280	EREMTNL	2657
278	T	275	281	REMTNLL	0.229
279	N	276	282	EMTNLLP	-0.071
280	L	277	283	MTNLLPL	-2.5
281	L	278	284	TNLLPLP	-1.6
282	P	279	285	NLLPLPP	-2043
283	L	280	286	LLPLPPR	-2443
284	P	281	287	LPLPPRT	-0.386
285	P	282	288	PLPPRTE	2043
286	R	283	289	LPPRTEK	2557
287	T	284	290	PPRTEKT	4614
288	E	285	291	PRTEKTG	5129
289	K	286	292	RTEKTGV	4.3

## Sheet: Kolaskar (antig.)
Position	Residue	Start	End	Peptide	Score
4	P	1	7	MANPPFP	0.993
5	P	2	8	ANPPFPF	1031
6	F	3	9	NPPFPFM	0.997
7	P	4	10	PPFPFMK	1019
8	F	5	11	PFPFMKR	0.991
9	M	6	12	FPFMKRF	0.995
10	K	7	13	PFMKRFV	1037
11	R	8	14	FMKRFVI	1049
12	F	9	15	MKRFVIK	1026
13	V	10	16	KRFVIKS	1053
14	I	11	17	RFVIKSP	1072
15	K	12	18	FVIKSPV	1145
16	S	13	19	VIKSPVL	1168
17	P	14	20	IKSPVLR	1095
18	V	15	21	KSPVLRE	1052
19	L	16	22	SPVLREF	1075
20	R	17	23	PVLREFL	1109
21	E	18	24	VLREFLA	1109
22	F	19	25	LREFLAE	1033
23	L	20	26	REFLAEF	1.01
24	A	21	27	EFLAEFF	1041
25	E	22	28	FLAEFFG	1045
26	F	23	29	LAEFFGT	1019
27	F	24	30	AEFFGTF	0.996
28	G	25	31	EFFGTFI	1008
29	T	26	32	FFGTFIL	1065
30	F	27	33	FGTFILY	1075
31	I	28	34	GTFILYI	1084
32	L	29	35	TFILYIF	1115
33	Y	30	36	FILYIFG	1.11
34	I	31	37	ILYIFGG	1079
35	F	32	38	LYIFGGA	1067
36	G	33	39	YIFGGAS	1033
37	G	34	40	IFGGASF	1023
38	A	35	41	FGGASFA	1.01
39	S	36	42	GGASFAH	1012
40	F	37	43	GASFAHY	1053
41	A	38	44	ASFAHYI	1093
42	H	39	45	SFAHYIF	1097
43	Y	40	46	FAHYIFS	1097
44	I	41	47	AHYIFSG	1066
45	F	42	48	HYIFSGQ	1059
46	S	43	49	YIFSGQK	1034
47	G	44	50	IFSGQKD	0.991
48	Q	45	51	FSGQKDV	1024
49	K	46	52	SGQKDVL	1047
50	D	47	53	GQKDVLA	1055
51	V	48	54	QKDVLAV	1127
52	L	49	55	KDVLAVT	1112
53	A	50	56	DVLAVTF	1135
54	V	51	57	VLAVTFC	1213
55	T	52	58	LAVTFCW	1143
56	F	53	59	AVTFCWG	1089
57	C	54	60	VTFCWGM	1055
58	W	55	61	TFCWGMG	0.983
59	G	56	62	FCWGMGV	1.05
60	M	57	63	CWGMGVM	1013
61	G	58	64	WGMGVML	0.989
62	V	59	65	GMGVMLG	0.987
63	M	60	66	MGVMLGI	1026
64	L	61	67	GVMLGIQ	1053
65	G	62	68	VMLGIQT	1058
66	I	63	69	MLGIQTG	0.986
67	Q	64	70	LGIQTGA	1.02
68	T	65	71	GIQTGAG	0.966
69	G	66	72	IQTGAGV	1039
70	A	67	73	QTGAGVS	1019
71	G	68	74	TGAGVSG	0.999
72	V	69	75	GAGVSGG	0.994
73	S	70	76	AGVSGGH	1027
74	G	71	77	GVSGGHV	1072
75	G	72	78	VSGGHVN	1058
76	H	73	79	SGGHVNP	1013
77	V	74	80	GGHVNPV	1066
78	N	75	81	GHVNPVV	1138
79	P	76	82	HVNPVVT	1143
80	V	77	83	VNPVVTT	1115
81	V	78	84	NPVVTTP	1.07
82	T	79	85	PVVTTPF	1115
83	T	80	86	VVTTPFA	1115
84	P	81	87	VTTPFAS	1062
85	F	82	88	TTPFASV	1062
86	A	83	89	TPFASVG	1057
87	S	84	90	PFASVGR	1052
88	V	85	91	FASVGRL	1078
89	G	86	92	ASVGRLP	1074
90	R	87	93	SVGRLPW	1.05
91	L	88	94	VGRLPWK	1038
92	P	89	95	GRLPWKK	0.973
93	W	90	96	RLPWKKV	1046
94	K	91	97	LPWKKVP	1073
95	K	92	98	PWKKVPH	1053
96	V	93	99	WKKVPHY	1067
97	P	94	100	KKVPHYL	1118
98	H	95	101	KVPHYLL	1163
99	Y	96	102	VPHYLLG	1155
100	L	97	103	PHYLLGQ	1103
101	L	98	104	HYLLGQH	1109
102	G	99	105	YLLGQHL	1129
103	Q	100	106	LLGQHLG	1088
104	H	101	107	LGQHLGA	1062
105	L	102	108	GQHLGAF	1039
106	G	103	109	QHLGAFL	1093
107	A	104	110	HLGAFLA	1.1
108	F	105	111	LGAFLAS	1086
109	L	106	112	GAFLASA	1.06
110	A	107	113	AFLASAI	1.1
111	S	108	114	FLASAIL	1126
112	A	109	115	LASAILY	1136
113	I	110	116	ASAILYF	1113
114	L	111	117	SAILYFN	1072
115	Y	112	118	AILYFNY	1094
116	F	113	119	ILYFNYI	1106
117	N	114	120	LYFNYID	1065
118	Y	115	121	YFNYIDA	1039
119	I	116	122	FNYIDAL	1051
120	D	117	123	NYIDALD	1019
121	A	118	124	YIDALDH	1066
122	L	119	125	IDALDHY	1066
123	D	120	126	DALDHYD	1025
124	H	121	127	ALDHYDG	1027
125	Y	122	128	LDHYDGG	0.999
126	D	123	129	DHYDGGE	0.942
127	G	124	130	HYDGGER	0.943
128	G	125	131	YDGGERQ	0.931
129	E	126	132	DGGERQI	0.929
130	R	127	133	GGERQIF	0.961
131	Q	128	134	GERQIFG	0.961
132	I	129	135	ERQIFGD	0.96
133	F	130	136	RQIFGDR	0.963
134	G	131	137	QIFGDRG	0.964
135	D	132	138	IFGDRGT	0.948
136	R	133	139	FGDRGTG	0.909
137	G	134	140	GDRGTGI	0.917
138	T	135	141	DRGTGIL	0.971
139	G	136	142	RGTGILL	1026
140	I	137	143	GTGILLT	1031
141	L	138	144	TGILLTT	1036
142	L	139	145	GILLTTF	1062
143	T	140	146	ILLTTFP	1089
144	T	141	147	LLTTFPN	1036
145	F	142	148	LTTFPNE	0.979
146	P	143	149	TTFPNEH	0.958
147	N	144	150	TFPNEHV	1026
148	E	145	151	FPNEHVH	1054
149	H	146	152	PNEHVHL	1076
150	V	147	153	NEHVHLS	1069
151	H	148	154	EHVHLSI	1123
152	L	149	155	HVHLSIC	1203
153	S	150	156	VHLSICI	1209
154	I	151	157	HLSICIF	1168
155	C	152	158	LSICIFD	1134
156	I	153	159	SICIFDT	1085
157	F	154	160	ICIFDTI	1105
158	D	155	161	CIFDTII	1105
159	T	156	162	IFDTIIC	1105
160	I	157	163	FDTIICS	1085
161	I	158	164	DTIICSG	1054
162	C	159	165	TIICSGL	1109
163	S	160	166	IICSGLL	1157
164	G	161	167	ICSGLLM	1111
165	L	162	168	CSGLLMF	1102
166	L	163	169	SGLLMFT	1.03
167	M	164	170	GLLMFTI	1.05
168	F	165	171	LLMFTIM	1043
169	T	166	172	LMFTIMV	1062
170	I	167	173	MFTIMVI	1048
171	M	168	174	FTIMVII	1095
172	V	169	175	TIMVIID	1063
173	I	170	176	IMVIIDN	1044
174	I	171	177	MVIIDNK	1012
175	D	172	178	VIIDNKN	1005
176	N	173	179	IIDNKNA	0.959
177	K	174	180	IDNKNAN	0.906
178	N	175	181	DNKNANT	0.871
179	A	176	182	NKNANTT	0.877
180	N	177	183	KNANTTS	0.911
181	T	178	184	NANTTSG	0.903
182	T	179	185	ANTTSGM	0.91
183	S	180	186	NTTSGMH	0.916
184	G	181	187	TTSGMHA	0.957
185	M	182	188	TSGMHAF	0.983
186	H	183	189	SGMHAFL	1032
187	A	184	190	GMHAFLI	1052
188	F	185	191	MHAFLIG	1052
189	L	186	192	HAFLIGI	1098
190	I	187	193	AFLIGIM	1058
191	G	188	194	FLIGIMV	1104
192	I	189	195	LIGIMVM	1066
193	M	190	196	IGIMVMA	1.04
194	V	191	197	GIMVMAL	1054
195	M	192	198	IMVMALC	1.13
196	A	193	199	MVMALCW	1093
197	L	194	200	VMALCWA	1127
198	C	195	201	MALCWAF	1086
199	W	196	202	ALCWAFG	1093
200	A	197	203	LCWAFGT	1.07
201	F	198	204	CWAFGTN	1003
202	G	199	205	WAFGTNC	1003
203	T	200	206	AFGTNCM	0.993
204	N	201	207	FGTNCMA	0.993
205	C	202	208	GTNCMAA	0.989
206	M	203	209	TNCMAAV	1062
207	A	204	210	NCMAAVN	1043
208	A	205	211	CMAAVNP	1084
209	V	206	212	MAAVNPA	1034
210	N	207	213	AAVNPAR	1041
211	P	208	214	AVNPARD	1013
212	A	209	215	VNPARDF	1017
213	R	210	216	NPARDFP	0.971
214	D	211	217	PARDFPP	1012
215	F	212	218	ARDFPPR	0.985
216	P	213	219	RDFPPRV	1031
217	P	214	220	DFPPRVL	1084
218	R	215	221	FPPRVLA	1113
219	V	216	222	PPRVLAS	1101
220	L	217	223	PRVLASI	1114
221	A	218	224	RVLASIV	1.16
222	S	219	225	VLASIVG	1.16
223	I	220	226	LASIVGY	1128
224	V	221	227	ASIVGYG	1074
225	G	222	228	SIVGYGP	1074
226	Y	223	229	IVGYGPE	1051
227	G	224	230	VGYGPEV	1084
228	P	225	231	GYGPEVF	1043
229	E	226	232	YGPEVFT	1048
230	V	227	233	GPEVFTY	1048
231	F	228	234	PEVFTYR	1047
232	T	229	235	EVFTYRH	1053
233	Y	230	236	VFTYRHF	1088
234	R	231	237	FTYRHFW	1018
235	H	232	238	TYRHFWW	0.989
236	F	233	239	YRHFWWI	1024
237	W	234	240	RHFWWIP	1.01
238	W	235	241	HFWWIPM	1003
239	I	236	242	FWWIPMF	1001
240	P	237	243	WWIPMFI	1.01
241	M	238	244	WIPMFIP	1035
242	F	239	245	IPMFIPH	1065
243	I	240	246	PMFIPHV	1098
244	P	241	247	MFIPHVG	1071
245	H	242	248	FIPHVGG	1078
246	V	243	249	IPHVGGL	1.1
247	G	244	250	PHVGGLI	1.1
248	G	245	251	HVGGLIG	1073
249	L	246	252	VGGLIGT	1045
250	I	247	253	GGLIGTW	0.975
251	G	248	254	GLIGTWL	1029
252	T	249	255	LIGTWLY	1.07
253	W	250	256	IGTWLYV	1089
254	L	251	257	GTWLYVL	1103
255	Y	252	258	TWLYVLA	1.13
256	V	253	259	WLYVLAI	1165
257	L	254	260	LYVLAIE	1159
258	A	255	261	YVLAIEM	1098
259	I	256	262	VLAIEMH	1.09
260	E	257	263	LAIEMHI	1057
261	M	258	264	AIEMHIV	1076
262	H	259	265	IEMHIVP	1076
263	I	260	266	EMHIVPE	1033
264	V	261	267	MHIVPER	1036
265	P	262	268	HIVPERV	1116
266	E	263	269	IVPERVR	1083
267	R	264	270	VPERVRD	1042
268	V	265	271	PERVRDD	0.968
269	R	266	272	ERVRDDR	0.941
270	D	267	273	RVRDDRT	0.949
271	D	268	274	VRDDRTE	0.946
272	R	269	275	RDDRTER	0.873
273	T	270	276	DDRTERE	0.87
274	E	271	277	DRTEREM	0.864
275	R	272	278	RTEREMT	0.87
276	E	273	279	TEREMTN	0.856
277	M	274	280	EREMTNL	0.905
278	T	275	281	REMTNLL	0.962
279	N	276	282	EMTNLLP	0.989
280	L	277	283	MTNLLPL	1046
281	L	278	284	TNLLPLP	1.08
282	P	279	285	NLLPLPP	1103
283	L	280	286	LLPLPPR	1116
284	P	281	287	LPLPPRT	1068
285	P	282	288	PLPPRTE	1011
286	R	283	289	LPPRTEK	0.992
287	T	284	290	PPRTEKT	0.943
288	E	285	291	PRTEKTG	0.916
289	K	286	292	RTEKTGV	0.961

## Sheet: BepiPred 2.0 Epit
	Position	AminoAcid	Score	Assignement
	1	M	0.245222222222
	2	A	0.309333333333
	3	N	0.373333333333
	4	P	0.430666666667
	5	P	0.483888888889
	6	F	0.510222222222	B
	7	P	0.529666666667	B
	8	F	0.537333333333	B
	9	M	0.550777777778	B
	10	K	0.543555555556	B
	11	R	0.538444444444	B
	12	F	0.527222222222	B
	13	V	0.526777777778	B
	14	I	0.525111111111	B
	15	K	0.497444444444
	16	S	0.480444444444
	17	P	0.472333333333
	18	V	0.435777777778
	19	L	0.413888888889
	20	R	0.388777777778
	21	E	0.367
	22	F	0.338666666667
	23	L	0.325444444444
	24	A	0.32
	25	E	0.297777777778
	26	F	0.278888888889
	27	F	0.286333333333
	28	G	0.277666666667
	29	T	0.274333333333
	30	F	0.274333333333
	31	I	0.273444444444
	32	L	0.261222222222
	33	Y	0.264777777778
	34	I	0.266444444444
	35	F	0.274333333333
	36	G	0.28
	37	G	0.289
	38	A	0.308666666667
	39	S	0.336444444444
	40	F	0.369888888889
	41	A	0.406666666667
	42	H	0.445333333333
	43	Y	0.483222222222
	44	I	0.513555555556	B
	45	F	0.542888888889	B
	46	S	0.576	B
	47	G	0.578888888889	B
	48	Q	0.571	B
	49	K	0.550444444444	B
	50	D	0.521888888889	B
	51	V	0.484888888889
	52	L	0.455777777778
	53	A	0.417
	54	V	0.389111111111
	55	T	0.354888888889
	56	F	0.337444444444
	57	C	0.320555555556
	58	W	0.318
	59	G	0.311555555556
	60	M	0.307111111111
	61	G	0.296444444444
	62	V	0.293888888889
	63	M	0.297666666667
	64	L	0.305333333333
	65	G	0.302888888889
	66	I	0.314222222222
	67	Q	0.330555555556
	68	T	0.353
	69	G	0.368444444444
	70	A	0.392888888889
	71	G	0.415222222222
	72	V	0.422111111111
	73	S	0.419777777778
	74	G	0.425888888889
	75	G	0.410888888889
	76	H	0.378444444444
	77	V	0.356
	78	N	0.337555555556
	79	P	0.311222222222
	80	V	0.286333333333
	81	V	0.269111111111
	82	T	0.255444444444
	83	T	0.249888888889
	84	P	0.271333333333
	85	F	0.313111111111
	86	A	0.348111111111
	87	S	0.373777777778
	88	V	0.408888888889
	89	G	0.433888888889
	90	R	0.461555555556
	91	L	0.492666666667
	92	P	0.493888888889
	93	W	0.490777777778
	94	K	0.483777777778
	95	K	0.462333333333
	96	V	0.438666666667
	97	P	0.412
	98	H	0.389333333333
	99	Y	0.365333333333
	100	L	0.351
	101	L	0.354333333333
	102	G	0.338333333333
	103	Q	0.309555555556
	104	H	0.301777777778
	105	L	0.300777777778
	106	G	0.284444444444
	107	A	0.277555555556
	108	F	0.269777777778
	109	L	0.252666666667
	110	A	0.236333333333
	111	S	0.24
	112	A	0.252333333333
	113	I	0.256888888889
	114	L	0.264111111111
	115	Y	0.296111111111
	116	F	0.335777777778
	117	N	0.366555555556
	118	Y	0.385888888889
	119	I	0.430777777778
	120	D	0.46
	121	A	0.483
	122	L	0.518333333333	B
	123	D	0.552555555556	B
	124	H	0.575666666667	B
	125	Y	0.588	B
	126	D	0.606777777778	B
	127	G	0.636111111111	B
	128	G	0.637888888889	B
	129	E	0.641444444444	B
	130	R	0.651111111111	B
	131	Q	0.649	B
	132	I	0.654888888889	B
	133	F	0.640222222222	B
	134	G	0.616888888889	B
	135	D	0.592	B
	136	R	0.567555555556	B
	137	G	0.543666666667	B
	138	T	0.519222222222	B
	139	G	0.487444444444
	140	I	0.456111111111
	141	L	0.429
	142	L	0.419222222222
	143	T	0.431222222222
	144	T	0.446111111111
	145	F	0.461111111111
	146	P	0.476666666667
	147	N	0.482333333333
	148	E	0.493111111111
	149	H	0.491888888889
	150	V	0.477777777778
	151	H	0.450111111111
	152	L	0.416111111111
	153	S	0.376888888889
	154	I	0.342555555556
	155	C	0.310444444444
	156	I	0.297555555556
	157	F	0.281111111111
	158	D	0.266222222222
	159	T	0.255
	160	I	0.257888888889
	161	I	0.258444444444
	162	C	0.259
	163	S	0.248444444444
	164	G	0.243222222222
	165	L	0.225777777778
	166	L	0.211222222222
	167	M	0.215222222222
	168	F	0.223
	169	T	0.224555555556
	170	I	0.231777777778
	171	M	0.255555555556
	172	V	0.300777777778
	173	I	0.352222222222
	174	I	0.410777777778
	175	D	0.472333333333
	176	N	0.527666666667	B
	177	K	0.576444444444	B
	178	N	0.609888888889	B
	179	A	0.646222222222	B
	180	N	0.660444444444	B
	181	T	0.639111111111	B
	182	T	0.624333333333	B
	183	S	0.593222222222	B
	184	G	0.552222222222	B
	185	M	0.498888888889
	186	H	0.454222222222
	187	A	0.417
	188	F	0.377777777778
	189	L	0.341
	190	I	0.319777777778
	191	G	0.291777777778
	192	I	0.266
	193	M	0.248222222222
	194	V	0.244444444444
	195	M	0.248
	196	A	0.253333333333
	197	L	0.259333333333
	198	C	0.261222222222
	199	W	0.283444444444
	200	A	0.303777777778
	201	F	0.321555555556
	202	G	0.336555555556
	203	T	0.349666666667
	204	N	0.352
	205	C	0.364333333333
	206	M	0.372666666667
	207	A	0.382111111111
	208	A	0.365888888889
	209	V	0.355444444444
	210	N	0.356888888889
	211	P	0.349555555556
	212	A	0.339666666667
	213	R	0.334666666667
	214	D	0.326888888889
	215	F	0.308777777778
	216	P	0.293666666667
	217	P	0.288666666667
	218	R	0.276333333333
	219	V	0.275222222222
	220	L	0.289666666667
	221	A	0.310111111111
	222	S	0.335
	223	I	0.364333333333
	224	V	0.401666666667
	225	G	0.441888888889
	226	Y	0.484
	227	G	0.523777777778	B
	228	P	0.547	B
	229	E	0.562222222222	B
	230	V	0.573444444444	B
	231	F	0.570333333333	B
	232	T	0.555555555556	B
	233	Y	0.532888888889	B
	234	R	0.510333333333	B
	235	H	0.476444444444
	236	F	0.437222222222
	237	W	0.403888888889
	238	W	0.374555555556
	239	I	0.331111111111
	240	P	0.302
	241	M	0.291111111111
	242	F	0.277888888889
	243	I	0.267888888889
	244	P	0.265888888889
	245	H	0.275888888889
	246	V	0.282777777778
	247	G	0.279
	248	G	0.293222222222
	249	L	0.310111111111
	250	I	0.312
	251	G	0.319222222222
	252	T	0.323111111111
	253	W	0.331666666667
	254	L	0.321111111111
	255	Y	0.330111111111
	256	V	0.365333333333
	257	L	0.39
	258	A	0.416777777778
	259	I	0.442666666667
	260	E	0.476777777778
	261	M	0.500555555556	B
	262	H	0.532888888889	B
	263	I	0.577888888889	B
	264	V	0.59	B
	265	P	0.604444444444	B
	266	E	0.620111111111	B
	267	R	0.617222222222	B
	268	V	0.625111111111	B
	269	R	0.625333333333	B
	270	D	0.639111111111	B
	271	D	0.644444444444	B
	272	R	0.645888888889	B
	273	T	0.657555555556	B
	274	E	0.649222222222	B
	275	R	0.640666666667	B
	276	E	0.639111111111	B
	277	M	0.631	B
	278	T	0.622666666667	B
	279	N	0.601333333333	B
	280	L	0.589111111111	B
	281	L	0.574111111111	B
	282	P	0.566111111111	B
	283	L	0.562444444444	B
	284	P	0.574111111111	B
	285	P	0.573444444444	B
	286	R	0.574666666667	B
	287	T	0.577	B
	288	E	0.58	B
	289	K	0.514666666667	B
	290	T	0.454
	291	G	0.392666666667
	292	V	0.327111111111

[truncated: 10 more sheets: BepiPred 1.0, ABCpred, BcePred,  Ellipro (non-linear B), MHC I Pig, MHC I Pig list, MHC II Human, MHC II Mouse, NetChop, PCPS]
