# Supplementary material for: First Data on Ornithodoros moubata Aquaporins: Structural, Phylogenetic and Immunogenic Characterisation as Vaccine Targets
Source: Pathogens. 2022 Jun 16;11(6):694. doi: 10.3390/pathogens11060694 (PMC9227307; doi:10.3390/pathogens11060694)
Supplement: Supplementary file 1 [file pathogens-11-00694-s001.zip › Table S10.xlsx]

## Sheet: Summary
Table S10: Structural, physicochemical and epitope predictions for OmAQP91
Position	Sequence	TMHMM	Emini (accesibility)	BepiPred 2.0 (surface)	Chou & Fasman (turns)	Karplus & Scoultz (flexibility)	Parker (hydrophilicity)	Kolaskar & Tongaonkar	BepiPred 2.0 (epit)	BepiPred 1.0 (epit)	ABCpred	BcePred	Ellipro	MHC I IEDB Pig	MHC II IEDB Human	MHC II IEDB Mouse	NetChop		CEG
1	M	i		E					.	.	.	.	.	.	.	.	.	S
2	G	i		E					.	.	.	.	.	T	.	.	.	.
3	R	i	E	E					.	.	.	.	.	T	.	.	.	.
4	V	i	E	E	.	E	.	.	.	.	.	.	.	T	.	.	.	S
5	R	i	.	E	.	E	E	.	B	.	.	B	.	T	.	.	.	.
6	Q	i	E	E	.	E	E	.	B	.	.	B	.	T	.	.	.	.
7	F	i	.	.	.	E	.	B	B	.	.	.	.	T	.	.	.	S
8	R	i	E	E	.	E	.	.	B	.	.	.	.	T	.	.	.	S
9	S	i	.	E	.	E	.	.	B	.	.	.	.	T	.	.	.	.
10	I	i	.	.	.	.	.	.	B	.	.	.	.	T	.	.	S	.
11	F	i	.	.	.	.	.	.	B	.	.	.	.	T	.	.	S	S
12	G	i	.	E	.	.	.	.	B	.	.	.	.	T	.	.	.	.
13	I	i	.	.	.	E	.	.	B	.	.	.	B	T	.	.	S	S
14	D	i	.	E	.	E	.	.	B	.	.	.	B	T	.	.	.	.
15	E	i	.	E	.	E	E	.	B	.	.	.	B	T	.	.	.	.
16	L	i	E	.	.	E	E	.	B	B	.	.	B	T	.	.	S	S
17	S	i	E	.	E	E	E	.	B	B	.	.	B	T	.	.	.	.
18	A	i	E	E	.	E	E	.	B	B	.	.	B	T	.	.	.	.
19	T	i	E	E	.	E	E	B	B	.	.	.	B	T	.	.	.	.
20	S	i	.	E	.	E	.	.	B	.	.	.	B	T	.	.	.	.
21	T	i	E	E	.	E	.	.	B	.	.	.	B	T	T	.	.	.
22	L	i	.	.	E	E	E	.	.	.	.	.	B	T	T	.	S	S
23	W	i	E	.	.	E	.	.	.	.	.	.	B	T	T	.	S	S
24	K	i	.	.	.	E	.	.	.	.	.	.	B	T	T	.	.	S
25	S	i	.	.	.	.	.	.	.	.	.	.	.	T	T	.	.	.
26	M	i	E	.	.	.	.	.	.	.	.	.	B	T	T	.	.	.
27	I	M	E	.	.	.	E	.	.	.	.	.	B	T	T	.	.	S
28	A	M	.	.	.	.	.	.	.	.	.	.	.	T	T	.	.	.
29	E	M	.	.	.	.	.	.	.	.	B	.	.	T	T	.	.	.
30	Y	M	E	.	.	.	.	.	.	.	B	.	.	T	T	.	S	.
31	I	M	E	.	.	.	E	.	.	.	B	.	.	T	T	.	.	S
32	G	M	.	.	.	.	.	.	.	.	B	.	.	T	T	.	.	.
33	T	M	.	.	.	.	.	.	.	.	B	.	.	T	T	.	.	.
34	A	M	.	.	.	.	.	B	.	.	B	.	.	T	T	.	S	.
35	M	M	.	E	.	.	.	B	.	.	B	.	.	T	T	.	.	S
36	L	M	.	.	.	.	.	B	.	.	B	.	.	T	.	.	S	S
37	V	M	.	.	.	.	.	B	.	.	B	.	.	T	.	.	S	.
38	F	M	.	.	.	.	.	B	.	.	B	.	.	.	.	.	.	S
39	I	M	.	.	.	.	.	B	.	.	B	.	.	.	.	.	.	S
40	A	M	.	.	.	.	.	B	.	.	B	.	.	T	.	.	.	.
41	C	M	.	.	.	.	.	B	.	.	B	.	.	T	.	.	.	.
42	G	M	.	.	.	E	E	B	.	.	B	.	B	T	.	.	.	.
43	T	M	.	.	E	E	.	.	.	.	B	.	.	T	.	.	.	.
44	C	M	.	.	E	E	E	.	.	.	B	.	.	T	.	.	.	.
45	T	M	.	.	.	E	E	.	.	B	B	.	B	T	.	T	.	.
46	N	M	E	.	E	E	E	.	.	B	B	.	B	T	.	T	.	.
47	W	M	.	.	E	E	E	.	B	B	B	.	B	T	.	T	S	S
48	G	M	E	E	E	E	E	.	B	B	B	B	B	T	.	T	.	.
49	R	M	E	E	.	E	E	.	B	B	B	B	B	T	.	T	.	S
50	G	o	E	E	E	E	E	.	B	B	B	.	B	T	.	T	.	.
51	G	o	E	E	E	E	E	.	B	B	B	B	B	T	.	T	.	.
52	E	o	E	E	E	E	E	.	B	B	B	.	B	T	.	T	.	.
53	P	o	.	E	E	E	E	.	B	B	B	.	B	T	.	T	.	.
54	S	M	E	E	E	E	E	.	B	B	B	.	B	T	.	T	.	.
55	I	M	.	.	.	.	E	.	B	B	B	.	B	T	.	T	.	S
56	A	M	.	.	.	.	.	B	.	.	B	.	B	T	T	T	.	.
57	Q	M	.	.	.	.	.	B	.	.		.	B	T	T	T	.	.
58	I	M	.	.	.	.	.	B	.	.		.	.	T	T	T	S	S
59	A	M	.	.	.	.	.	B	.	.		.	.	T	T	T	.	.
60	L	M	.	E	.	.	.	B	.	.		.	B	T	T	T	S	S
61	S	M	.	.	.	.	.	B	.	.		.	.	T	T	T	.	.
62	F	M	.	.	.	.	.	B	.	.		.	.	T	T	T	.	S
63	A	M	.	.	.	.	.	B	.	.		.	.	T	T	T	.	.
64	F	M	.	E	.	.	.	B	.	.		.	.	T	T	T	.	S
65	I	M	.	.	.	.	.	B	.	.		.	.	T	T	T	.	.
66	V	M	.	.	.	.	.	B	.	.		.	.	T	T	T	.	S
67	A	M	.	.	.	.	.	B	.	.		.	.	T	T	T	S	.
68	T	M	.	.	.	.	.	B	.	.	B	.	.	T	T	T	.	.
69	M	M	E	.	.	.	E	.	.	.	B	.	.	T	T	T	S	S
70	A	M	.	.	.	.	.	.	.	.	B	.	.	T	T	T	S	.
71	Q	M	.	.	.	.	.	.	.	.	B	.	B	T	T	T	.	.
72	A	M	.	.	.	.	.	.	.	.	B	.	B	T	T	T	.	.
73	L	M	.	.	.	.	.	B	.	.	B	.	.	T	T	T	S	S
74	G	M	.	.	.	.	E	B	.	.	B	.	.	T	T	T	.	.
75	H	M	.	.	E	.	E	B	.	.	B	.	.	T	T	T	.	.
76	V	M	.	.	E	E	E	B	.	.	B	.	.	T	.	T	S	S
77	S	i	.	.	E	E	E	B	.	.	B	.	.	T	.	T	.	.
78	G	i	.	.	.	E	.	B	.	.	B	.	.	T	.	T	.	.
79	A	i	.	.	E	.	E	.	.	B	B	.	.	T	.	T	.	.
80	H	i	E	.	E	.	.	.	.	B	B	.	.	T	.	T	.	.
81	I	i	E	.	E	.	E	.	.	B	B	.	.	T	.	T	.	S
82	N	i	.	.	.	.	.	B	.	B	B	.	.	T	.	T	.	.
83	P	i	.	.	.	E	.	B	.	.	B	.	.	T	.	T	.	.
84	A	i	E	.	.	E	.	.	.	.	B	.	.	T	.	T	.	.
85	V	i	.	.	E	.	E	.	.	.	B	.	.	T	.	T	.	S
86	T	i	.	.	.	.	.	.	.	.	B	.	.	T	.	T	.	.
87	M	i	.	.	.	.	.	.	.	.	B	.	.	T	.	.	S	S
88	G	i	.	.	.	.	.	B	.	.	B	.	.	T	.	.	.	.
89	M	i	.	.	.	.	.	B	.	.	B	.	.	T	.	T	S	S
90	L	i	.	.	.	.	.	B	.	.	B	.	.	T	.	T	S	S
91	C	i	.	.	.	.	.	B	.	.	B	B	.	.	.	T	.	.
92	V	i	.	.	.	.	.	B	.	.	B	B	B	.	.	T	.	S
93	G	i	.	E	.	.	.	B	.	.	B	B	B	T	.	T	.	.
94	H	i	.	E	.	.	.	B	.	.	B	B	B	T	.	T	.	.
95	I	i	.	.	.	.	.	B	.	.	B	B	B	T	.	T	.	S
96	S	i	.	E	.	.	.	B	B	.	B	.	B	T	T	T	.	.
97	I	M	.	E	.	.	.	B	.	.	B	.	B	T	T	T	S	.
98	L	M	.	E	.	.	.	B	.	.	B	.	B	T	T	T	.	S
99	R	M	.	E	.	.	.	B	.	.	B	.	.	T	T	T	.	S
100	A	M	.	.	.	.	.	B	.	.	B	.	.	T	T	T	.	.
101	F	M	.	.	.	.	.	B	.	.	B	.	B	T	T	T	.	S
102	F	M	.	.	.	.	.	B	.	.	B	.	B	T	T	T	.	S
103	Y	M	.	.	.	.	.	B	.	.	B	.	.	T	T	T	S	.
104	I	M	.	.	.	.	.	B	.	.	B	B	.	T	T	.	S	S
105	C	M	.	.	.	.	.	B	.	.	B	B	.	T	T	.	.	.
106	S	M	.	.	.	.	.	B	.	.	B	B	.	T	T	.	.	.
107	Q	M	.	E	.	E	.	B	.	.	B	B	.	T	T	.	.	.
108	L	M	.	.	E	E	E	B	.	.	.	.	.	T	T	.	S	S
109	I	M	.	.	E	E	.	.	.	.	.	.	.	.	T	T	.	S
110	G	M	.	.	.	E	.	.	.	.	.	.	.	T	T	T	.	.
111	G	M	.	.	E	E	.	.	.	.	.	.	.	T	.	T	.	.
112	I	M	.	.	E	E	.	.	.	.	.	.	.	T	.	T	.	.
113	T	M	.	.	E	E	E	.	.	.	.	.	.	T	.	T	.	.
114	G	M	.	.	.	E	.	.	.	.	.	.	.	T	.	T	.	.
115	A	M	.	.	.	.	.	B	.	.	.	.	.	T	.	T	S	.
116	A	M	.	.	.	.	.	B	.	.	.	.	B	T	.	T	.	.
117	V	M	.	.	.	.	.	B	.	.	.	.	B	T	.	T	.	S
118	L	M	.	.	.	.	.	B	.	.	.	.	B	T	.	T	S	S
119	R	M	.	.	.	.	.	B	.	.	.	.	B	T	.	T	S	S
120	A	o	.	.	.	.	.	B	.	.	.	.	B	T	.	T	.	.
121	V	o	E	.	.	E	E	.	.	B	.	.	B	T	.	T	.	S
122	T	o	E	.	.	E	E	.	.	B	.	B	B	T	.	T	.	.
123	P	o	E	E	.	E	E	.	B	B	.	B	B	T	.	T	.	.
124	E	o	E	E	.	E	.	.	B	B	.	B	B	T	.	.	.	.
125	E	o	E	E	E	E	E	.	B	B	.	B	B	T	.	.	.	.
126	R	o	E	.	E	E	E	.	B	B	.	B	B	T	.	.	S	.
127	Q	o	E	E	.	E	E	.	B	B	.	B	B	T	.	.	.	.
128	G	o	.	E	.	E	E	.	B	B	.	.	B	T	.	.	.	.
129	L	o	.	.	E	E	E	.	B	B	.	.	B	T	.	.	S	S
130	L	o	.	E	E	E	E	.	B	.	.	.	.	T	.	.	S	S
131	G	o	.	.	E	E	.	.	B	.	.	.	.	T	.	.	.	.
132	G	o	.	.	.	E	.	B	B	.	.	.	.	T	.	.	.	.
133	T	o	.	.	.	E	.	.	B	.	.	.	.	T	.	.	.	.
134	A	o	E	.	E	E	.	.	B	B	.	.	.	T	.	.	.	.
135	L	o	E	.	E	E	.	.	B	B	.	.	B	T	.	.	S	S
136	S	o	.	.	.	E	E	.	B	B	.	.	B	T	.	.	S	.
137	E	o	.	E	.	E	E	.	B	B	.	.	B	T	.	.	.	.
138	G	o	E	E	E	E	E	.	B	B	.	.	B	T	.	.	.	.
139	V	M	E	.	E	E	E	.	B	B	.	.	B	T	.	.	.	S
140	T	M	E	.	.	E	E	.	B	B	.	.	B	T	.	.	.	.
141	P	M	E	.	E	E	E	.	B	B	.	.	B	T	T	.	.	.
142	F	M	E	E	.	E	.	B	B	.	.	B	B	T	T	.	S	S
143	Q	M	.	.	.	E	.	B	.	.	.	B	B	T	T	.	.	.
144	G	M	.	.	.	E	.	B	.	.	.	B	B	T	T	.	.	.
145	V	M	.	.	.	.	.	B	.	.	.	B	B	T	T	.	.	.
146	V	M	.	.	.	.	.	B	.	.	.	B	B	T	T	.	S	.
147	V	M	.	.	.	.	.	B	.	.	.	B	B	T	T	.	S	S
148	E	M	.	.	.	.	.	B	.	.	.	B	.	T	T	.	.	.
149	L	M	.	.	.	.	.	B	.	.	.	B	.	T	T	.	S	S
150	V	M	.	.	.	.	.	B	.	.	.	B	.	T	T	.	.	.
151	I	M	.	.	.	.	.	B	.	.	.	B	.	T	T	.	.	.
152	T	M	.	.	.	.	.	B	.	.	.	B	.	T	T	.	.	.
153	F	M	.	.	.	.	.	B	.	.	.	B	.	T	T	.	S	S
154	I	M	.	.	.	.	.	B	.	.	.	B	.	T	T	.	.	.
155	L	M	.	.	.	.	.	B	.	.	.	B	.	T	T	.	S	S
156	V	M	.	.	.	.	.	B	.	.	.	B	.	T	T	.	.	S
157	L	M	.	.	.	.	.	B	.	.	.	B	.	T	T	.	S	S
158	T	M	.	.	.	.	.	B	.	.	.	.	.	T	T	.	.	.
159	V	M	.	.	.	.	.	B	.	.	.	.	.	T	T	.	S	.
160	F	M	.	.	.	.	.	B	.	.	.	.	.	T	T	.	S	S
161	A	M	.	.	.	.	.	B	.	.	.	.	.	.	.	.	.	.
162	V	i	.	.	.	.	.	B	.	.	.	.	.	.	.	.	S	S
163	C	i	.	.	.	E	E	B	.	.	.	.	.	.	.	.	.	.
164	D	i	E	.	E	E	E	.	.	.	.	.	.	.	.	.	.	.
165	Q	i	E	E	E	E	E	B	B	.	.	.	.	.	.	.	.	.
166	N	i	E	E	.	E	.	.	B	.	.	B	.	.	T	T	.	.
167	R	i	E	E	E	E	E	.	B	.	.	B	B	.	T	T	.	.
168	L	i	.	E	.	E	.	B	B	.	.	.	B	.	T	T	S	S
169	D	i	.	E	.	E	.	.	B	.	.	.	B	.	T	T	.	.
170	V	i	.	E	E	E	.	B	B	.	.	.	B	T	T	T	S	S
171	L	i	.	E	E	E	.	B	B	B	.	B	B	T	T	T	.	S
172	G	i	.	E	E	E	E	B	B	.	.	.	B	T	T	T	.	.
173	S	M	.	.	E	E	.	B	B	B	.	B	.	T	T	T	.	.
174	P	M	E	.	E	E	.	B	B	.	.	.	.	T	T	T	.	.
175	P	M	.	.	E	E	.	B	.	B	.	.	.	T	T	T	.	.
176	L	M	.	.	E	E	.	B	.	.	.	.	.	T	T	T	S	S
177	A	M	.	.	.	.	.	B	.	.	.	.	.	T	T	T	.	.
178	I	M	.	.	.	.	.	B	.	.	.	.	.	T	T	T	S	S
179	G	M	.	E	.	.	.	B	.	.	.	.	.	T	T	T	.	.
180	L	M	.	E	.	.	.	B	.	.	.	.	.	T	T	T	S	S
181	A	M	.	E	.	.	.	B	.	.	.	.	.	T	.	.	S	.
182	V	M	.	E	E	.	.	.	.	.	.	.	.	T	.	.	S	S
183	G	M	.	.	.	.	.	B	.	.	.	.	.	T	.	.	.	.
184	A	M	.	.	.	.	.	B	.	.	B	.	.	T	.	.	.	.
185	G	M	.	.	.	.	.	.	.	.	B	.	.	T	.	.	.	.
186	H	M	.	.	.	.	.	.	.	.	B	.	.	T	.	.	.	.
187	L	M	.	.	.	.	.	B	.	.	B	.	.	T	.	T	S	S
188	M	M	.	.	.	.	.	B	.	.	B	.	B	T	.	T	S	.
189	V	M	.	.	.	.	.	B	.	.	B	B	.	T	.	T	S	.
190	I	M	.	.	.	.	.	B	.	.	B	.	.	T	.	T	.	S
191	G	M	.	.	.	.	.	.	.	.	B	.	.	T	.	T	.	.
192	Y	M	.	.	.	E	.	B	.	.	B	.	B	T	.	T	S	S
193	T	M	E	.	E	E	E	.	.	.	B	.	.	.	.	T	.	.
194	G	M	E	.	.	E	E	.	.	.	B	.	.	.	.	T	.	.
195	A	M	E	.	.	E	E	.	.	B	B	.	.	T	.	T	.	.
196	S	o	E	.	E	E	E	.	.	B	B	.	.	T	.	T	.	.
197	M	o	E	.	E	E	E	.	.	B	B	.	.	T	.	T	S	S
198	N	o	E	.	.	E	E	.	.	B	B	.	.	T	.	T	.	.
199	T	o	E	.	E	E	E	.	.	B	B	B	.	T	.	T	S	.
200	A	o	E	.	.	E	E	.	.	B	B	.	.	T	.	T	.	.
201	R	o	E	.	E	E	E	.	.	B	B	.	.	T	.	T	.	S
202	T	o	E	.	.	E	E	.	.	B	B	.	.	T	.	T	.	.
203	F	o	E	.	.	E	E	.	.	B	B	.	.	T	.	T	S	S
204	G	o	.	.	.	E	.	.	.	.	B	.	.	T	.	T	.	.
205	P	o	.	.	.	E	.	B	.	.	B	.	.	T	.	T	.	.
206	A	o	.	.	.	E	.	B	.	.	B	.	.	T	.	T	.	.
207	V	o	.	.	.	E	E	B	.	.	B	.	.	T	.	T	.	.
208	I	o	.	.	.	.	.	B	.	.	B	.	B	T	.	T	S	S
209	S	o	.	.	.	E	.	B	.	.	B	.	B	T	.	T	.	.
210	G	o	.	.	.	E	.	B	.	.	B	.	B	T	.	T	.	.
211	A	o	E	E	E	E	E	.	.	.	B	.	B	T	.	T	.	.
212	F	o	.	.	.	E	E	.	B	.	B	.	B	T	.	.	S	S
213	D	o	E	E	E	E	E	.	B	.	B	.	B	T	.	.	.	.
214	D	o	E	.	.	E	.	.	B	.	B	.	B	T	.	.	.	.
215	H	M	E	.	.	E	E	.	.	B	B	.	.	T	.	T	.	.
216	W	M	E	.	E	.	.	.	.	.	B	.	B	T	.	.	.	S
217	V	M	.	.	.	.	.	B	.	.	B	.	B	T	.	.	.	.
218	Y	M	.	.	.	.	.	B	.	.	B	.	.	T	.	.	S	S
219	W	M	.	.	E	.	.	B	.	.	B	.	.	T	.	.	S	S
220	L	M	.	.	.	.	.	B	.	.	B	B	B	T	.	.	.	S
221	G	M	.	.	E	E	.	.	.	.	B	.	.	.	.	.	.	.
222	P	M	.	.	E	E	.	.	.	.	B	.	.	.	.	.	.	.
223	I	M	.	.	.	E	.	.	.	.	B	.	.	.	.	.	.	S
224	G	M	.	.	E	E	E	.	.	.	B	.	.	.	.	.	.	.
225	G	M	.	.	E	E	.	.	.	.	B	.	.	.	.	.	.	.
226	G	M	.	.	.	E	.	.	.	.	B	.	.	.	.	.	.	.
227	I	M	.	.	E	E	.	.	.	.	B	.	.	T	.	.	.	.
228	L	M	.	.	.	.	.	.	.	.	B	.	B	T	.	.	.	S
229	A	M	.	.	.	.	.	B	.	.	B	.	.	T	.	T	S	.
230	G	M	.	.	.	.	.	B	.	.	B	.	.	T	.	T	.	.
231	F	M	.	.	.	.	.	B	.	.	B	.	B	T	T	T	.	S
232	V	M	E	.	.	.	.	B	.	.	B	.	B	T	T	T	.	.
233	Y	M	.	.	.	.	.	B	.	.	B	B	.	T	T	T	S	S
234	Q	M	.	.	.	.	.	B	.	.	B	B	.	T	T	T	.	.
235	Y	M	E	.	.	.	.	B	.	.	B	B	.	T	T	T	S	S
236	V	M	.	.	.	.	.	B	.	.	B	.	.	T	T	T	S	S
237	L	M	.	.	.	.	.	B	.	.	B	.	B	T	T	T	S	S
238	S	i	.	E	E	E	.	B	B	.	B	.	B	T	T	T	.	.
239	A	i	.	E	.	E	.	B	B	.	B	.	B	T	T	T	.	.
240	P	i	E	E	E	E	.	B	B	.	B	.	B	T	T	T	.	.
241	P	i	.	E	.	E	.	B	B	B	B	.	B	T	T	T	.	.
242	I	i	E	E	.	E	.	.	B	B	B	.	B	T	T	T	S	S
243	S	i	.	E	.	E	.	.	B	.	B	.	B	T	T	T	.	.
244	F	i	.	E	.	.	.	B	B	.	B	.	B	T	T	T	S	S
245	E	i	.	E	.	.	.	.	B	.	B	.	B	T	T	T	.	.
246	A	i	E	E	.	.	E	.	B	.	B	.	B	T	.	T	S	.
247	L	i	.	E	.	E	E	.	B	.	B	.	B	T	.	T	S	S
248	D	i	.	E	.	E	.	.	B	.	B	B	B	T	.	T	.	.
249	K	i	E	E	.	E	E	B	B	.	B	.	B	T	.	.	.	.
250	A	i	.	E	.	E	E	B	B	.	B	.	B	T	.	.	.	.
251	Q	i	.	E	.	.	E	B	B	.	B	.	B	T	.	.	.	.
252	L	i	.	.	.	.	.	B	B	.	B	.	B	T	.	.	S	S
253	A	i	.	E	.	.	.	B	B	.	B	.	B	T	.	.	S	.
254	C	i	.	E	.	.	.	B	B	.	B	.	B	T	.	.	.	.
255	L	i	.	E	.	.	.	B	B	.	B	.	B	T	.	.	S	S
256	A	i	.	E	.	.	.	B	B	.	B	.	B	T	.	.	.	.
257	R	i	E	E	.	.	.	B	B	.	B	.	B	T	.	.	.	.
258	F	i	E	.	.	.	.	.	B	.	B	B	B	T	.	.	.	S
259	H	i	E	E	.	E	E	.	B	.	B	B	B	T	.	.	.	.
260	N	i	E	E	.	E	E	.	B	.	B	B	B	T	.	.	.	.
261	K	i	.	E	.	E	E	.	B	.	B	B	B	T	.	.	S	.
262	E	i	E	E	.	E	E	.	B	B	B	B	B	T	.	.	.	.
263	A	i	E	E	.	E	E	.	B	B	B	B	B	T	.	.	.	.
264	V	i	E	E	.	E	E	.	B	B	B	B	B	T	.	.	S	S
265	E	i	E	E	.	E	E	.	B	B	B	B	B	T	.	.	.	.
266	D	i	E	E	.	E	.	.	B	B	.	B	B	T	.	.	.	.
267	R	i	E	E	.	E	.	.	B	B	.	B	B	T	.	.	.	S
268	T	i	E	E	.		E	.	B	B	.	B	B	T	.	.	.	.
269	T	i		E				.	.	B	.	.	B	T	.	.	.	.
270	A	i		E				.	.	B	.	.	B	T	.	.	S	.
271	I	i		E				.	.	.	.	.	.	T	.	.	S	.

## Sheet: Figure OmAQP91
	Position	1									10										20										30										40
Structure and exposure	Sequence	M	G	R	V	R	Q	F	R	S	I	F	G	I	D	E	L	S	A	T	S	T	L	W	K	S	M	I	A	E	Y	I	G	T	A	M	L	V	F	I	A	C	G	T	C	T	N	W	G
	TMHMM	i	i	i	i	i	i	i	i	i	i	i	i	i	i	i	i	i	i	i	i	i	i	i	i	i	i	M	M	M	M	M	M	M	M	M	M	M	M	M	M	M	M	M	M	M	M	M	M
	Emini (accesibility)			E	E	.	E	.	E	.	.	.	.	.	.	.	E	E	E	E	.	E	.	E	.	.	E	E	.	.	E	E	.	.	.	.	.	.	.	.	.	.	.	.	.	.	E	.	E
	BepiPred 2.0 (surface)	E	E	E	E	E	E	.	E	E	.	.	E	.	E	E	.	.	E	E	E	E	.	.	.	.	.	.	.	.	.	.	.	.	.	E	.	.	.	.	.	.	.	.	.	.	.	.	E
	Chou & Fasman (turns)				.	.	.	.	.	.	.	.	.	.	.	.	.	E	.	.	.	.	E	.	.	.	.	.	.	.	.	.	.	.	.	.	.	.	.	.	.	.	.	E	E	.	E	E	E
	Karplus & Scoultz (flexibility)				E	E	E	E	E	E	.	.	.	E	E	E	E	E	E	E	E	E	E	E	E	.	.	.	.	.	.	.	.	.	.	.	.	.	.	.	.	.	E	E	E	E	E	E	E
	Parker (hydrophilicity)				.	E	E	.	.	.	.	.	.	.	.	E	E	E	E	E	.	.	E	.	.	.	.	E	.	.	.	E	.	.	.	.	.	.	.	.	.	.	E	.	E	E	E	E	E
Linear and discontinuous B cell epitopes	Kolaskar & Tongaonkar				.	.	.	B	.	.	.	.	.	.	.	.	.	.	.	B	.	.	.	.	.	.	.	.	.	.	.	.	.	.	B	B	B	B	B	B	B	B	B	.	.	.	.	.	.
	BepiPred 2.0	.	.	.	.	B	B	B	B	B	B	B	B	B	B	B	B	B	B	B	B	B	.	.	.	.	.	.	.	.	.	.	.	.	.	.	.	.	.	.	.	.	.	.	.	.	.	B	B
	BepiPred 1.0	.	.	.	.	.	.	.	.	.	.	.	.	.	.	.	B	B	B	.	.	.	.	.	.	.	.	.	.	.	.	.	.	.	.	.	.	.	.	.	.	.	.	.	.	B	B	B	B
	ABCpred	.	.	.	.	.	.	.	.	.	.	.	.	.	.	.	.	.	.	.	.	.	.	.	.	.	.	.	.	B	B	B	B	B	B	B	B	B	B	B	B	B	B	B	B	B	B	B	B
	BcePred	.	.	.	.	B	B	.	.	.	.	.	.	.	.	.	.	.	.	.	.	.	.	.	.	.	.	.	.	.	.	.	.	.	.	.	.	.	.	.	.	.	.	.	.	.	.	.	B
	ElliPro (discontinuous)	.	.	.	.	.	.	.	.	.	.	.	.	B	B	B	B	B	B	B	B	B	B	B	B	.	B	B	.	.	.	.	.	.	.	.	.	.	.	.	.	.	B	.	.	B	B	B	B
T cell epitopes	MHC I IEDB Pig	.	T	T	T	T	T	T	T	T	T	T	T	T	T	T	T	T	T	T	T	T	T	T	T	T	T	T	T	T	T	T	T	T	T	T	T	T	.	.	T	T	T	T	T	T	T	T	T
	MHC II IEDB Human	.	.	.	.	.	.	.	.	.	.	.	.	.	.	.	.	.	.	.	.	T	T	T	T	T	T	T	T	T	T	T	T	T	T	T	.	.	.	.	.	.	.	.	.	.	.	.	.
	MHC II IEDB Mouse	.	.	.	.	.	.	.	.	.	.	.	.	.	.	.	.	.	.	.	.	.	.	.	.	.	.	.	.	.	.	.	.	.	.	.	.	.	.	.	.	.	.	.	.	T	T	T	T
Proteasomal processing	NetChop	.	.	.	.	.	.	.	.	.	S	S	.	S	.	.	S	.	.	.	.	.	S	S	.	.	.	.	.	.	S	.	.	.	S	.	S	S	.	.	.	.	.	.	.	.	.	S	.
	PCPS	S	.	.	S	.	.	S	S	.	.	S	.	S	.	.	S	.	.	.	.	.	S	S	S	.	.	S	.	.	.	S	.	.	.	S	S	.	S	S	.	.	.	.	.	.	.	S	.
	Antigenic peptides																																										OmAQP91_A
					Key OmAQP91:
					o (outside), extracellular; M, transmembrane; i, intracellular
					E, exposed on surface, predicted turns, hydrophilic
					F, predicted turns and flexibility
					B, B-cell epitope
					T, T-cell epitope
					S, predicted proteasome cut site
[truncated: 223 more columns]

## Sheet: TMHMM
TMHMM result
# OmAQP91 Length: 271
# OmAQP91 Number of predicted TMHs: 6
# OmAQP91 Exp number of AAs in TMHs: 132.56635
# OmAQP91 Exp number, first 60 AAs: 25.97991
# OmAQP91 Total prob of N-in: 0.91090
# OmAQP91 POSSIBLE N-term signal sequence
OmAQP91	TMHMM2.0	inside	1	26
OmAQP91	TMHMM2.0	TMhelix	27	49
OmAQP91	TMHMM2.0	outside	50	53
OmAQP91	TMHMM2.0	TMhelix	54	76
OmAQP91	TMHMM2.0	inside	77	96
OmAQP91	TMHMM2.0	TMhelix	97	119
OmAQP91	TMHMM2.0	outside	120	138
OmAQP91	TMHMM2.0	TMhelix	139	161
OmAQP91	TMHMM2.0	inside	162	172
OmAQP91	TMHMM2.0	TMhelix	173	195
OmAQP91	TMHMM2.0	outside	196	214
OmAQP91	TMHMM2.0	TMhelix	215	237
OmAQP91	TMHMM2.0	inside	238	271

## Sheet: Emini (accesibility)
Position	Residue	Start	End	Peptide	Score
3	R	1	6	MGRVRQ	2073
4	V	2	7	GRVRQF	1814
5	R	3	8	RVRQFR	3.59
6	Q	4	9	VRQFRS	2457
7	F	5	10	RQFRSI	2.32
8	R	6	11	QFRSIF	1026
9	S	7	12	FRSIFG	0.586
10	I	8	13	RSIFGI	0.474
11	F	9	14	SIFGID	0.405
12	G	10	15	IFGIDE	0.523
13	I	11	16	FGIDEL	0.615
14	D	12	17	GIDELS	0.952
15	E	13	18	IDELSA	0.972
16	L	14	19	DELSAT	2001
17	S	15	20	ELSATS	1605
18	A	16	21	LSATST	1338
19	T	17	22	SATSTL	1338
20	S	18	23	ATSTLW	1.05
21	T	19	24	TSTLWK	2078
22	L	20	25	STLWKS	1.93
23	W	21	26	TLWKSM	1425
24	K	22	27	LWKSMI	0.692
25	S	23	28	WKSMIA	0.848
26	M	24	29	KSMIAE	1396
27	I	25	30	SMIAEY	1094
28	A	26	31	MIAEYI	0.572
29	E	27	32	IAEYIG	0.572
30	Y	28	33	AEYIGT	1178
31	I	29	34	EYIGTA	1178
32	G	30	35	YIGTAM	0.673
33	T	31	36	IGTAML	0.354
34	A	32	37	GTAMLV	0.375
35	M	33	38	TAMLVF	0.328
36	L	34	39	AMLVFI	0.159
37	V	35	40	MLVFIA	0.159
38	F	36	41	LVFIAC	0.086
39	I	37	42	VFIACG	0.104
40	A	38	43	FIACGT	0.202
41	C	39	44	IACGTC	0.125
42	G	40	45	ACGTCT	0.257
43	T	41	46	CGTCTN	0.409
44	C	42	47	GTCTNW	0.802
45	T	43	48	TCTNWG	0.802
46	N	44	49	CTNWGR	1089
47	W	45	50	TNWGRG	2.01
48	G	46	51	NWGRGG	1378
49	R	47	52	WGRGGE	1484
50	G	48	53	GRGGEP	2182
51	G	49	54	RGGEPS	2955
52	E	50	55	GGEPSI	1058
53	P	51	56	GEPSIA	1.08
54	S	52	57	EPSIAQ	1889
55	I	53	58	PSIAQI	0.765
56	A	54	59	SIAQIA	0.5
57	Q	55	60	IAQIAL	0.307
58	I	56	61	AQIALS	0.588
59	A	57	62	QIALSF	0.504
60	L	58	63	IALSFA	0.294
61	S	59	64	ALSFAF	0.363
62	F	60	65	LSFAFI	0.252
63	A	61	66	SFAFIV	0.227
64	F	62	67	FAFIVA	0.171
65	I	63	68	AFIVAT	0.285
66	V	64	69	FIVATM	0.279
67	A	65	70	IVATMA	0.326
68	T	66	71	VATMAQ	0.804
69	M	67	72	ATMAQA	1095
70	A	68	73	TMAQAL	0.894
71	Q	69	74	MAQALG	0.613
72	A	70	75	AQALGH	0.843
73	L	71	76	QALGHV	0.619
74	G	72	77	ALGHVS	0.479
75	H	73	78	LGHVSG	0.469
76	V	74	79	GHVSGA	0.575
77	S	75	80	HVSGAH	0.79
78	G	76	81	VSGAHI	0.407
79	A	77	82	SGAHIN	0.882
80	H	78	83	GAHINP	1018
81	I	79	84	AHINPA	1039
82	N	80	85	HINPAV	0.764
83	P	81	86	INPAVT	0.81
84	A	82	87	NPAVTM	1143
85	V	83	88	PAVTMG	0.704
86	T	84	89	AVTMGM	0.45
87	M	85	90	VTMGML	0.368
88	G	86	91	TMGMLC	0.265
89	M	87	92	MGMLCV	0.137
90	L	88	93	GMLCVG	0.137
91	C	89	94	MLCVGH	0.188
92	V	90	95	LCVGHI	0.133
93	G	91	96	CVGHIS	0.216
94	H	92	97	VGHISI	0.283
95	I	93	98	GHISIL	0.314
96	S	94	99	HISILR	0.621
97	I	95	100	ISILRA	0.461
98	L	96	101	SILRAF	0.57
99	R	97	102	ILRAFF	0.368
100	A	98	103	LRAFFY	0.823
101	F	99	104	RAFFYI	0.7
102	F	100	105	AFFYIC	0.191
103	Y	101	106	FFYICS	0.254
104	I	102	107	FYICSQ	0.508
105	C	103	108	YICSQL	0.484
106	S	104	109	ICSQLI	0.216
107	Q	105	110	CSQLIG	0.306
108	L	106	111	SQLIGG	0.564
109	I	107	112	QLIGGI	0.295
110	G	108	113	LIGGIT	0.246
111	G	109	114	IGGITG	0.295
112	I	110	115	GGITGA	0.425
113	T	111	116	GITGAA	0.434
114	G	112	117	ITGAAV	0.326
115	A	113	118	TGAAVL	0.383
116	A	114	119	GAAVLR	0.52
117	V	115	120	AAVLRA	0.531
118	L	116	121	AVLRAV	0.39
119	R	117	122	VLRAVT	0.557
120	A	118	123	LRAVTP	1.16
121	V	119	124	RAVTPE	2437
122	T	120	125	AVTPEE	2155
123	P	121	126	VTPEER	4177
124	E	122	127	TPEERQ	9747
125	E	123	128	PEERQG	6683
126	R	124	129	EERQGL	3565
127	Q	125	130	ERQGLL	1697
128	G	126	131	RQGLLG	0.97
129	L	127	132	QGLLGG	0.49
130	L	128	133	GLLGGT	0.408
131	G	129	134	LLGGTA	0.417
132	G	130	135	LGGTAL	0.417
133	T	131	136	GGTALS	0.677
134	A	132	137	GTALSE	1186
135	L	133	138	TALSEG	1186
136	S	134	139	ALSEGV	0.61
137	E	135	140	LSEGVT	0.871
138	G	136	141	SEGVTP	1633
139	V	137	142	EGVTPF	1055
140	T	138	143	GVTPFQ	1055
141	P	139	144	VTPFQG	1055
142	F	140	145	TPFQGV	1055
143	Q	141	146	PFQGVV	0.543
144	G	142	147	FQGVVV	0.261
145	V	143	148	QGVVVE	0.521
146	V	144	149	GVVVEL	0.248
147	V	145	150	VVVELV	0.186
148	E	146	151	VVELVI	0.176
149	L	147	152	VELVIT	0.342
150	V	148	153	ELVITF	0.399
151	I	149	154	LVITFI	0.161
152	T	150	155	VITFIL	0.161
153	F	151	156	ITFILV	0.161
154	I	152	157	TFILVL	0.19
155	L	153	158	FILVLT	0.19
156	V	154	159	ILVLTV	0.163
157	L	155	160	LVLTVF	0.201
158	T	156	161	VLTVFA	0.246
159	V	157	162	LTVFAV	0.246
160	F	158	163	TVFAVC	0.16
161	A	159	164	VFAVCD	0.185
162	V	160	165	FAVCDQ	0.432
163	C	161	166	AVCDQN	0.803
164	D	162	167	VCDQNR	1556
165	Q	163	168	CDQNRL	1729
166	N	164	169	DQNRLD	5386
167	R	165	170	QNRLDV	2394
168	L	166	171	NRLDVL	1.14
169	D	167	172	RLDVLG	0.701
170	V	168	173	LDVLGS	0.48
171	L	169	174	DVLGSP	0.9
172	G	170	175	VLGSPP	0.833
173	S	171	176	LGSPPL	0.926
174	P	172	177	GSPPLA	1134
175	P	173	178	SPPLAI	0.803
176	L	174	179	PPLAIG	0.593
177	A	175	180	PLAIGL	0.316
178	I	176	181	LAIGLA	0.207
179	G	177	182	AIGLAV	0.186
180	L	178	183	IGLAVG	0.182
181	A	179	184	GLAVGA	0.263
182	V	180	185	LAVGAG	0.263
183	G	181	186	AVGAGH	0.433
184	A	182	187	VGAGHL	0.354
185	G	183	188	GAGHLM	0.472
186	H	184	189	AGHLMV	0.354
187	L	185	190	GHLMVI	0.245
188	M	186	191	HLMVIG	0.245
189	V	187	192	LMVIGY	0.283
190	I	188	193	MVIGYT	0.495
191	G	189	194	VIGYTG	0.495
192	Y	190	195	IGYTGA	0.673
193	T	191	196	GYTGAS	1287
194	G	192	197	YTGASM	1287
195	A	193	198	TGASMN	1321
196	S	194	199	GASMNT	1321
197	M	195	200	ASMNTA	1349
198	N	196	201	SMNTAR	2615
199	T	197	202	MNTART	2816
200	A	198	203	NTARTF	2464
201	R	199	204	TARTFG	1516
202	T	200	205	ARTFGP	1624
203	F	201	206	RTFGPA	1624
204	G	202	207	TFGPAV	0.616
205	P	203	208	FGPAVI	0.299
206	A	204	209	GPAVIS	0.463
207	V	205	210	PAVISG	0.463
208	I	206	211	AVISGA	0.302
209	S	207	212	VISGAF	0.259
210	G	208	213	ISGAFD	0.583
211	A	209	214	SGAFDD	1389
212	F	210	215	GAFDDH	1.41
213	D	211	216	AFDDHW	1499
214	D	212	217	FDDHWV	1101
215	H	213	218	DDHWVY	1992
216	W	214	219	DHWVYW	1254
217	V	215	220	HWVYWL	0.619
218	Y	216	221	WVYWLG	0.45
219	W	217	222	VYWLGP	0.662
220	L	218	223	YWLGPI	0.626
221	G	219	224	WLGPIG	0.395
222	P	220	225	LGPIGG	0.372
223	I	221	226	GPIGGG	0.446
224	G	222	227	PIGGGI	0.316
225	G	223	228	IGGGIL	0.169
226	G	224	229	GGGILA	0.243
227	I	225	230	GGILAG	0.243
228	L	226	231	GILAGF	0.213
229	A	227	232	ILAGFV	0.159
230	G	228	233	LAGFVY	0.356
231	F	229	234	AGFVYQ	0.749
232	V	230	235	GFVYQY	1161
233	Y	231	236	FVYQYV	0.871
234	Q	232	237	VYQYVL	0.829
235	Y	233	238	YQYVLS	1497
236	V	234	239	QYVLSA	0.965
237	L	235	240	YVLSAP	0.862
238	S	236	241	VLSAPP	0.851
239	A	237	242	LSAPPI	0.803
240	P	238	243	SAPPIS	1305
241	P	239	244	APPISF	0.844
242	I	240	245	PPISFE	1446
243	S	241	246	PISFEA	0.945
244	F	242	247	ISFEAL	0.504
245	E	243	248	SFEALD	1.2
246	A	244	249	FEALDK	1791
247	L	245	250	EALDKA	2.09
248	D	246	251	ALDKAQ	2.09
249	K	247	252	LDKAQL	1706
250	A	248	253	DKAQLA	2.09
251	Q	249	254	KAQLAC	0.671
252	L	250	255	AQLACL	0.277
253	A	251	256	QLACLA	0.277
254	C	252	257	LACLAR	0.313
255	L	253	258	ACLARF	0.328
256	A	254	259	CLARFH	0.442
257	R	255	260	LARFHN	1327
258	F	256	261	ARFHNK	3219
259	H	257	262	RFHNKE	5518
260	N	258	263	FHNKEA	2846
261	K	259	264	HNKEAV	2.44
262	E	260	265	NKEAVE	3105
263	A	261	266	KEAVED	3224
264	V	262	267	EAVEDR	3158
265	E	263	268	AVEDRT	2632
266	D	264	269	VEDRTT	3759
267	R	265	270	EDRTTA	5117
268	T	266	271	DRTTAI	2071

## Sheet: BepiPred 2.0 Surf
Entry	Position	AminoAcid	Exposed/ Buried	Relative Surface Accessilibity	Helix Probability	Sheet Probability	Coil Probability	Epitope Probability	Assignement
OmAQP91	1	M	E	0.733	0.003	0.003	0.994	0.310666666667
OmAQP91	2	G	E	0.644	0.058	0.017	0.925	0.376111111111
OmAQP91	3	R	E	0.568	0.113	0.043	0.844	0.424888888889
OmAQP91	4	V	E	0.355	0.184	0.043	0.773	0.496222222222
OmAQP91	5	R	E	0.682	0.353	0.048	0.598	0.556	B
OmAQP91	6	Q	E	0.613	0.339	0.016	0.645	0.558888888889	B
OmAQP91	7	F	B	0.147	0.353	0.048	0.598	0.566111111111	B
OmAQP91	8	R	E	0.456	0.353	0.048	0.598	0.557222222222	B
OmAQP91	9	S	E	0.558	0.455	0.046	0.498	0.553333333333	B
OmAQP91	10	I	B	0.219	0.430	0.016	0.555	0.555	B
OmAQP91	11	F	B	0.21	0.430	0.016	0.555	0.555333333333	B
OmAQP91	12	G	E	0.515	0.181	0.017	0.803	0.565777777778	B
OmAQP91	13	I	B	0.238	0.181	0.017	0.803	0.566777777778	B
OmAQP91	14	D	E	0.526	0.181	0.017	0.803	0.570888888889	B
OmAQP91	15	E	E	0.577	0.339	0.016	0.645	0.567777777778	B
OmAQP91	16	L	B	0.232	0.353	0.048	0.598	0.560222222222	B
OmAQP91	17	S	B	0.263	0.257	0.016	0.727	0.561666666667	B
OmAQP91	18	A	E	0.387	0.181	0.017	0.803	0.561444444444	B
OmAQP91	19	T	E	0.382	0.116	0.016	0.868	0.530111111111	B
OmAQP91	20	S	E	0.442	0.406	0.004	0.591	0.515333333333	B
OmAQP91	21	T	E	0.539	0.694	0.003	0.303	0.501777777778	B
OmAQP91	22	L	B	0.112	0.923	0.002	0.076	0.458444444444
OmAQP91	23	W	B	0.06	0.970	0.001	0.029	0.435555555556
OmAQP91	24	K	B	0.204	0.970	0.001	0.029	0.414444444444
OmAQP91	25	S	B	0.234	0.988	0.000	0.012	0.388333333333
OmAQP91	26	M	B	0.052	0.988	0.000	0.012	0.369
OmAQP91	27	I	B	0.115	0.988	0.000	0.012	0.354
OmAQP91	28	A	B	0.085	0.988	0.000	0.012	0.343888888889
OmAQP91	29	E	B	0.111	0.988	0.000	0.012	0.324333333333
OmAQP91	30	Y	B	0.139	0.988	0.000	0.012	0.312222222222
OmAQP91	31	I	B	0.221	0.988	0.000	0.012	0.314666666667
OmAQP91	32	G	B	0.136	0.988	0.000	0.012	0.308777777778
OmAQP91	33	T	B	0.147	0.988	0.000	0.012	0.306333333333
OmAQP91	34	A	B	0.18	0.988	0.000	0.012	0.301555555556
OmAQP91	35	M	E	0.291	0.988	0.000	0.012	0.290555555556
OmAQP91	36	L	B	0.145	0.988	0.000	0.012	0.272444444444
OmAQP91	37	V	B	0.125	0.988	0.000	0.012	0.269555555556
OmAQP91	38	F	B	0.185	0.988	0.000	0.012	0.270111111111
OmAQP91	39	I	B	0.188	0.970	0.001	0.029	0.273
OmAQP91	40	A	B	0.119	0.970	0.001	0.029	0.279555555556
OmAQP91	41	C	B	0.133	0.970	0.001	0.029	0.281222222222
OmAQP91	42	G	B	0.083	0.923	0.002	0.076	0.300111111111
OmAQP91	43	T	B	0.059	0.938	0.007	0.055	0.335888888889
OmAQP91	44	C	B	0.075	0.878	0.010	0.111	0.379333333333
OmAQP91	45	T	B	0.073	0.717	0.014	0.269	0.433111111111
OmAQP91	46	N	B	0.225	0.522	0.016	0.462	0.481111111111
OmAQP91	47	W	B	0.23	0.268	0.043	0.689	0.525777777778	B
OmAQP91	48	G	E	0.37	0.184	0.043	0.773	0.567444444444	B
OmAQP91	49	R	E	0.466	0.113	0.043	0.844	0.600222222222	B
OmAQP91	50	G	E	0.39	0.058	0.017	0.925	0.626555555556	B
OmAQP91	51	G	E	0.623	0.018	0.019	0.964	0.635333333333	B
OmAQP91	52	E	E	0.559	0.016	0.005	0.979	0.624555555556	B
OmAQP91	53	P	E	0.318	0.053	0.004	0.942	0.612333333333	B
OmAQP91	54	S	E	0.384	0.053	0.004	0.942	0.578222222222	B
OmAQP91	55	I	B	0.216	0.455	0.046	0.498	0.541666666667	B
OmAQP91	56	A	B	0.228	0.701	0.107	0.192	0.498222222222
OmAQP91	57	Q	B	0.153	0.831	0.044	0.125	0.460333333333
OmAQP91	58	I	B	0.153	0.878	0.010	0.111	0.428333333333
OmAQP91	59	A	B	0.151	0.938	0.007	0.055	0.407
OmAQP91	60	L	E	0.295	0.970	0.001	0.029	0.386888888889
OmAQP91	61	S	B	0.203	0.970	0.001	0.029	0.36
OmAQP91	62	F	B	0.252	0.970	0.001	0.029	0.329888888889
OmAQP91	63	A	B	0.246	0.970	0.001	0.029	0.311666666667
OmAQP91	64	F	E	0.329	0.970	0.001	0.029	0.306888888889
OmAQP91	65	I	B	0.198	0.970	0.001	0.029	0.303444444444
OmAQP91	66	V	B	0.226	0.970	0.001	0.029	0.291888888889
OmAQP91	67	A	B	0.177	0.975	0.003	0.022	0.299777777778
OmAQP91	68	T	B	0.209	0.938	0.007	0.055	0.302
OmAQP91	69	M	B	0.135	0.938	0.007	0.055	0.31
OmAQP91	70	A	B	0.148	0.878	0.010	0.111	0.328444444444
OmAQP91	71	Q	B	0.168	0.911	0.033	0.057	0.358444444444
OmAQP91	72	A	B	0.142	0.751	0.050	0.199	0.381555555556
OmAQP91	73	L	B	0.118	0.522	0.016	0.462	0.398333333333
OmAQP91	74	G	B	0.095	0.257	0.016	0.727	0.416555555556
OmAQP91	75	H	B	0.255	0.181	0.017	0.803	0.430777777778
OmAQP91	76	V	B	0.087	0.116	0.016	0.868	0.430666666667
OmAQP91	77	S	B	0.11	0.058	0.017	0.925	0.427222222222
OmAQP91	78	G	B	0.113	0.018	0.019	0.964	0.416777777778
OmAQP91	79	A	B	0.049	0.018	0.019	0.964	0.404222222222
OmAQP91	80	H	B	0.079	0.053	0.043	0.903	0.374555555556
OmAQP91	81	I	B	0.042	0.113	0.043	0.844	0.351666666667
OmAQP91	82	N	B	0.049	0.058	0.017	0.925	0.324777777778
OmAQP91	83	P	B	0.032	0.782	0.003	0.215	0.314333333333
OmAQP91	84	A	B	0.039	0.923	0.002	0.076	0.293111111111
OmAQP91	85	V	B	0.048	0.938	0.007	0.055	0.278111111111
OmAQP91	86	T	B	0.035	0.878	0.010	0.111	0.266888888889
OmAQP91	87	M	B	0.027	0.975	0.003	0.022	0.265
OmAQP91	88	G	B	0.056	0.988	0.000	0.012	0.283222222222
OmAQP91	89	M	B	0.093	0.988	0.000	0.012	0.315555555556
OmAQP91	90	L	B	0.079	0.970	0.001	0.029	0.356444444444
OmAQP91	91	C	B	0.092	0.970	0.001	0.029	0.381111111111
OmAQP91	92	V	B	0.252	0.859	0.002	0.139	0.406888888889
OmAQP91	93	G	E	0.452	0.406	0.004	0.591	0.439
OmAQP91	94	H	E	0.568	0.109	0.005	0.886	0.467444444444
OmAQP91	95	I	B	0.133	0.016	0.005	0.979	0.495888888889
OmAQP91	96	S	E	0.548	0.016	0.005	0.979	0.508222222222	B
OmAQP91	97	I	E	0.263	0.109	0.005	0.886	0.5
OmAQP91	98	L	E	0.385	0.109	0.005	0.886	0.483
OmAQP91	99	R	E	0.323	0.181	0.017	0.803	0.458222222222
OmAQP91	100	A	B	0.05	0.502	0.102	0.396	0.439777777778
OmAQP91	101	F	B	0.099	0.751	0.050	0.199	0.403111111111
OmAQP91	102	F	B	0.151	0.878	0.010	0.111	0.387111111111
OmAQP91	103	Y	B	0.182	0.938	0.007	0.055	0.373333333333
OmAQP91	104	I	B	0.139	0.975	0.003	0.022	0.358333333333
OmAQP91	105	C	B	0.191	0.970	0.001	0.029	0.356555555556
OmAQP91	106	S	B	0.141	0.923	0.002	0.076	0.351111111111
OmAQP91	107	Q	E	0.347	0.923	0.002	0.076	0.343888888889
OmAQP91	108	L	B	0.268	0.923	0.002	0.076	0.341222222222
OmAQP91	109	I	B	0.255	0.970	0.001	0.029	0.343333333333
OmAQP91	110	G	B	0.197	0.970	0.001	0.029	0.351555555556
OmAQP91	111	G	B	0.174	0.970	0.001	0.029	0.347333333333
OmAQP91	112	I	B	0.242	0.988	0.000	0.012	0.345
OmAQP91	113	T	B	0.158	0.988	0.000	0.012	0.343555555556
OmAQP91	114	G	B	0.082	0.988	0.000	0.012	0.321444444444
OmAQP91	115	A	B	0.12	0.988	0.000	0.012	0.336555555556
OmAQP91	116	A	B	0.229	0.970	0.001	0.029	0.346888888889
OmAQP91	117	V	B	0.107	0.970	0.001	0.029	0.356444444444
OmAQP91	118	L	B	0.047	0.975	0.003	0.022	0.370333333333
OmAQP91	119	R	B	0.181	0.938	0.007	0.055	0.399222222222
OmAQP91	120	A	B	0.239	0.878	0.010	0.111	0.432222222222
OmAQP91	121	V	B	0.131	0.622	0.015	0.363	0.458444444444
OmAQP91	122	T	B	0.142	0.339	0.016	0.645	0.485444444444
OmAQP91	123	P	E	0.306	0.257	0.016	0.727	0.536555555556	B
OmAQP91	124	E	E	0.507	0.321	0.003	0.675	0.561222222222	B
OmAQP91	125	E	E	0.408	0.502	0.002	0.495	0.582555555556	B
OmAQP91	126	R	B	0.165	0.522	0.016	0.462	0.613	B
OmAQP91	127	Q	E	0.439	0.522	0.016	0.462	0.635	B
OmAQP91	128	G	E	0.416	0.430	0.016	0.555	0.626444444444	B
OmAQP91	129	L	B	0.228	0.339	0.016	0.645	0.620888888889	B
OmAQP91	130	L	E	0.32	0.184	0.043	0.773	0.610222222222	B
OmAQP91	131	G	B	0.292	0.113	0.087	0.800	0.597	B
OmAQP91	132	G	B	0.218	0.056	0.142	0.802	0.585111111111	B
OmAQP91	133	T	B	0.174	0.064	0.216	0.721	0.590444444444	B
OmAQP91	134	A	B	0.273	0.020	0.205	0.775	0.583555555556	B
OmAQP91	135	L	B	0.257	0.018	0.088	0.893	0.573333333333	B
OmAQP91	136	S	B	0.217	0.018	0.019	0.964	0.573888888889	B
OmAQP91	137	E	E	0.453	0.058	0.017	0.925	0.581888888889	B
OmAQP91	138	G	E	0.45	0.058	0.017	0.925	0.574333333333	B
OmAQP91	139	V	B	0.175	0.053	0.043	0.903	0.577888888889	B
OmAQP91	140	T	B	0.159	0.053	0.043	0.903	0.566444444444	B
OmAQP91	141	P	B	0.234	0.430	0.016	0.555	0.541111111111	B
OmAQP91	142	F	E	0.3	0.522	0.016	0.462	0.500222222222	B
OmAQP91	143	Q	B	0.224	0.600	0.003	0.397	0.471666666667
OmAQP91	144	G	B	0.103	0.717	0.014	0.269	0.433666666667
OmAQP91	145	V	B	0.089	0.878	0.010	0.111	0.391666666667
OmAQP91	146	V	B	0.117	0.970	0.001	0.029	0.360888888889
OmAQP91	147	V	B	0.119	0.970	0.001	0.029	0.334333333333
OmAQP91	148	E	B	0.064	0.970	0.001	0.029	0.289444444444
OmAQP91	149	L	B	0.11	0.988	0.000	0.012	0.274111111111
OmAQP91	150	V	B	0.13	0.988	0.000	0.012	0.261222222222
OmAQP91	151	I	B	0.086	0.970	0.001	0.029	0.236555555556
OmAQP91	152	T	B	0.081	0.970	0.001	0.029	0.223222222222
OmAQP91	153	F	B	0.129	0.970	0.001	0.029	0.217555555556
OmAQP91	154	I	B	0.181	0.970	0.001	0.029	0.213666666667
OmAQP91	155	L	B	0.092	0.970	0.001	0.029	0.198111111111
OmAQP91	156	V	B	0.096	0.970	0.001	0.029	0.199666666667
OmAQP91	157	L	B	0.143	0.975	0.003	0.022	0.213
OmAQP91	158	T	B	0.081	0.975	0.003	0.022	0.217888888889
OmAQP91	159	V	B	0.073	0.938	0.007	0.055	0.226555555556
OmAQP91	160	F	B	0.094	0.938	0.007	0.055	0.268
OmAQP91	161	A	B	0.093	0.802	0.014	0.185	0.314888888889
OmAQP91	162	V	B	0.094	0.717	0.014	0.269	0.363
OmAQP91	163	C	B	0.105	0.522	0.016	0.462	0.422222222222
OmAQP91	164	D	B	0.281	0.339	0.016	0.645	0.472111111111
OmAQP91	165	Q	E	0.564	0.176	0.004	0.820	0.520333333333	B
OmAQP91	166	N	E	0.497	0.109	0.005	0.886	0.555	B
OmAQP91	167	R	E	0.411	0.053	0.004	0.942	0.596666666667	B
OmAQP91	168	L	E	0.472	0.053	0.004	0.942	0.627333333333	B
OmAQP91	169	D	E	0.479	0.016	0.005	0.979	0.631	B
OmAQP91	170	V	E	0.323	0.053	0.004	0.942	0.624888888889	B
OmAQP91	171	L	E	0.449	0.109	0.005	0.886	0.613444444444	B
OmAQP91	172	G	E	0.358	0.246	0.004	0.750	0.579444444444	B
OmAQP91	173	S	B	0.233	0.502	0.002	0.495	0.553555555556	B
OmAQP91	174	P	B	0.291	0.782	0.003	0.215	0.517666666667	B
OmAQP91	175	P	B	0.233	0.859	0.002	0.139	0.491222222222
OmAQP91	176	L	B	0.216	0.970	0.001	0.029	0.455111111111
OmAQP91	177	A	B	0.26	0.970	0.001	0.029	0.431888888889
OmAQP91	178	I	B	0.261	0.988	0.000	0.012	0.400222222222
OmAQP91	179	G	E	0.31	0.988	0.000	0.012	0.378888888889
OmAQP91	180	L	E	0.303	0.988	0.000	0.012	0.355
OmAQP91	181	A	E	0.222	0.988	0.000	0.012	0.349222222222
OmAQP91	182	V	E	0.264	0.975	0.003	0.022	0.355222222222
OmAQP91	183	G	B	0.231	0.975	0.003	0.022	0.362222222222
OmAQP91	184	A	B	0.204	0.970	0.001	0.029	0.359111111111
OmAQP91	185	G	B	0.229	0.970	0.001	0.029	0.351555555556
OmAQP91	186	H	B	0.265	0.923	0.002	0.076	0.346333333333
OmAQP91	187	L	B	0.21	0.923	0.002	0.076	0.363111111111
OmAQP91	188	M	B	0.162	0.859	0.002	0.139	0.372666666667
OmAQP91	189	V	B	0.133	0.694	0.003	0.303	0.386
OmAQP91	190	I	B	0.107	0.622	0.015	0.363	0.390777777778
OmAQP91	191	G	B	0.229	0.502	0.002	0.495	0.392777777778
OmAQP91	192	Y	B	0.183	0.430	0.016	0.555	0.394
OmAQP91	193	T	B	0.09	0.176	0.004	0.820	0.406777777778
OmAQP91	194	G	B	0.129	0.053	0.004	0.942	0.424
OmAQP91	195	A	B	0.109	0.058	0.017	0.925	0.429666666667
OmAQP91	196	S	B	0.057	0.053	0.043	0.903	0.423777777778
OmAQP91	197	M	B	0.051	0.052	0.084	0.864	0.422333333333
OmAQP91	198	N	B	0.06	0.113	0.043	0.844	0.417888888889
OmAQP91	199	T	B	0.056	0.339	0.016	0.645	0.414222222222
OmAQP91	200	A	B	0.021	0.339	0.016	0.645	0.398222222222
OmAQP91	201	R	B	0.089	0.430	0.016	0.555	0.392
OmAQP91	202	T	B	0.073	0.430	0.016	0.555	0.380444444444
OmAQP91	203	F	B	0.058	0.430	0.016	0.555	0.364777777778
OmAQP91	204	G	B	0.029	0.522	0.016	0.462	0.357444444444
OmAQP91	205	P	B	0.133	0.522	0.016	0.462	0.367555555556
OmAQP91	206	A	B	0.132	0.522	0.016	0.462	0.375
OmAQP91	207	V	B	0.041	0.561	0.047	0.393	0.389444444444
OmAQP91	208	I	B	0.079	0.502	0.102	0.396	0.407111111111
OmAQP91	209	S	B	0.258	0.268	0.043	0.689	0.441222222222
OmAQP91	210	G	B	0.261	0.116	0.016	0.868	0.458888888889
OmAQP91	211	A	E	0.28	0.058	0.017	0.925	0.488111111111
OmAQP91	212	F	B	0.213	0.058	0.017	0.925	0.519333333333	B
OmAQP91	213	D	E	0.495	0.053	0.004	0.942	0.538555555556	B
OmAQP91	214	D	B	0.284	0.116	0.016	0.868	0.533222222222	B
OmAQP91	215	H	B	0.115	0.307	0.165	0.527	0.513333333333	B
OmAQP91	216	W	B	0.206	0.538	0.173	0.289	0.488222222222
OmAQP91	217	V	B	0.115	0.725	0.163	0.112	0.456666666667
OmAQP91	218	Y	B	0.134	0.779	0.101	0.120	0.431888888889
OmAQP91	219	W	B	0.15	0.870	0.077	0.053	0.408777777778
OmAQP91	220	L	B	0.221	0.911	0.033	0.057	0.384222222222
OmAQP91	221	G	B	0.117	0.878	0.010	0.111	0.356
OmAQP91	222	P	B	0.159	0.923	0.002	0.076	0.347
OmAQP91	223	I	B	0.269	0.970	0.001	0.029	0.345
OmAQP91	224	G	B	0.274	0.970	0.001	0.029	0.346777777778
OmAQP91	225	G	B	0.147	0.970	0.001	0.029	0.344888888889
OmAQP91	226	G	B	0.118	0.988	0.000	0.012	0.338222222222
OmAQP91	227	I	B	0.262	0.988	0.000	0.012	0.330555555556
OmAQP91	228	L	B	0.222	0.988	0.000	0.012	0.333444444444
OmAQP91	229	A	B	0.13	0.988	0.000	0.012	0.328555555556
OmAQP91	230	G	B	0.135	0.988	0.000	0.012	0.340444444444
OmAQP91	231	F	B	0.243	0.988	0.000	0.012	0.342888888889
OmAQP91	232	V	B	0.126	0.970	0.001	0.029	0.326555555556
OmAQP91	233	Y	B	0.096	0.970	0.001	0.029	0.333444444444
OmAQP91	234	Q	B	0.274	0.970	0.001	0.029	0.364777777778
OmAQP91	235	Y	B	0.176	0.923	0.002	0.076	0.404666666667
OmAQP91	236	V	B	0.048	0.878	0.010	0.111	0.435555555556
OmAQP91	237	L	B	0.111	0.717	0.014	0.269	0.469555555556
OmAQP91	238	S	E	0.363	0.181	0.017	0.803	0.500777777778	B
OmAQP91	239	A	E	0.427	0.053	0.004	0.942	0.516777777778	B
OmAQP91	240	P	E	0.574	0.016	0.005	0.979	0.535888888889	B
OmAQP91	241	P	E	0.489	0.016	0.005	0.979	0.575111111111	B
OmAQP91	242	I	E	0.557	0.053	0.004	0.942	0.595444444444	B
OmAQP91	243	S	E	0.567	0.053	0.004	0.942	0.594888888889	B
OmAQP91	244	F	E	0.378	0.246	0.004	0.750	0.598333333333	B
OmAQP91	245	E	E	0.607	0.339	0.016	0.645	0.603888888889	B
OmAQP91	246	A	E	0.389	0.522	0.016	0.462	0.591333333333	B
OmAQP91	247	L	E	0.416	0.522	0.016	0.462	0.585888888889	B
OmAQP91	248	D	E	0.545	0.802	0.014	0.185	0.581111111111	B
OmAQP91	249	K	E	0.515	0.923	0.002	0.076	0.579111111111	B
OmAQP91	250	A	E	0.521	0.923	0.002	0.076	0.572777777778	B
OmAQP91	251	Q	E	0.541	0.923	0.002	0.076	0.570222222222	B
OmAQP91	252	L	B	0.266	0.923	0.002	0.076	0.571555555556	B
OmAQP91	253	A	E	0.502	0.782	0.003	0.215	0.575222222222	B
OmAQP91	254	C	E	0.545	0.694	0.003	0.303	0.572	B
OmAQP91	255	L	E	0.555	0.406	0.004	0.591	0.580444444444	B
OmAQP91	256	A	E	0.552	0.257	0.016	0.727	0.576888888889	B
OmAQP91	257	R	E	0.551	0.268	0.043	0.689	0.596777777778	B
OmAQP91	258	F	B	0.243	0.191	0.086	0.723	0.610666666667	B
OmAQP91	259	H	E	0.514	0.113	0.043	0.844	0.619444444444	B
OmAQP91	260	N	E	0.536	0.268	0.043	0.689	0.625888888889	B
OmAQP91	261	K	E	0.564	0.257	0.016	0.727	0.637666666667	B
OmAQP91	262	E	E	0.609	0.339	0.016	0.645	0.641888888889	B
OmAQP91	263	A	E	0.568	0.430	0.016	0.555	0.649666666667	B
OmAQP91	264	V	E	0.393	0.430	0.016	0.555	0.645222222222	B
OmAQP91	265	E	E	0.617	0.430	0.016	0.555	0.647777777778	B
OmAQP91	266	D	E	0.497	0.339	0.016	0.645	0.627333333333	B
OmAQP91	267	R	E	0.592	0.339	0.016	0.645	0.606222222222	B
OmAQP91	268	T	E	0.506	0.268	0.043	0.689	0.536666666667	B
OmAQP91	269	T	E	0.651	0.113	0.087	0.800	0.468888888889
OmAQP91	270	A	E	0.542	0.053	0.043	0.903	0.393222222222
OmAQP91	271	I	E	0.612	0.003	0.003	0.994	0.317555555556

## Sheet: Chou_Fasman (turns)
Position	Residue	Start	End	Peptide	Score
4	V	1	7	MGRVRQF	0.877
5	R	2	8	GRVRQFR	0.927
6	Q	3	9	RVRQFRS	0.909
7	F	4	10	VRQFRSI	0.84
8	R	5	11	RQFRSIF	0.854
9	S	6	12	QFRSIFG	0.941
10	I	7	13	FRSIFGI	0.869
11	F	8	14	RSIFGID	0.991
12	G	9	15	SIFGIDE	0.961
13	I	10	16	IFGIDEL	0.841
14	D	11	17	FGIDELS	0.979
15	E	12	18	GIDELSA	0.987
16	L	13	19	IDELSAT	0.901
17	S	14	20	DELSATS	1039
18	A	15	21	ELSATST	0.967
19	T	16	22	LSATSTL	0.946
20	S	17	23	SATSTLW	0.999
21	T	18	24	ATSTLWK	0.939
22	L	19	25	TSTLWKS	1049
23	W	20	26	STLWKSM	0.997
24	K	21	27	TLWKSMI	0.86
25	S	22	28	LWKSMIA	0.817
26	M	23	29	WKSMIAE	0.839
27	I	24	30	KSMIAEY	0.864
28	A	25	31	SMIAEYI	0.787
29	E	26	32	MIAEYIG	0.806
30	Y	27	33	IAEYIGT	0.857
31	I	28	34	AEYIGTA	0.884
32	G	29	35	EYIGTAM	0.876
33	T	30	36	YIGTAML	0.854
34	A	31	37	IGTAMLV	0.763
35	M	32	38	GTAMLVF	0.781
36	L	33	39	TAMLVFI	0.626
37	V	34	40	AMLVFIA	0.583
38	F	35	41	MLVFIAC	0.659
39	I	36	42	LVFIACG	0.796
40	A	37	43	VFIACGT	0.849
41	C	38	44	FIACGTC	0.947
42	G	39	45	IACGTCT	0.999
43	T	40	46	ACGTCTN	1154
44	C	41	47	CGTCTNW	1197
45	T	42	48	GTCTNWG	1.25
46	N	43	49	TCTNWGR	1163
47	W	44	50	CTNWGRG	1249
48	G	45	51	TNWGRGG	1301
49	R	46	52	NWGRGGE	1.27
50	G	47	53	WGRGGEP	1264
51	G	48	54	GRGGEPS	1331
52	E	49	55	RGGEPSI	1176
53	P	50	56	GGEPSIA	1134
54	S	51	57	GEPSIAQ	1051
55	I	52	58	EPSIAQI	0.896
56	A	53	59	PSIAQIA	0.884
57	Q	54	60	SIAQIAL	0.751
58	I	55	61	IAQIALS	0.751
59	A	56	62	AQIALSF	0.77
60	L	57	63	QIALSFA	0.77
61	S	58	64	IALSFAF	0.716
62	F	59	65	ALSFAFI	0.716
63	A	60	66	LSFAFIV	0.693
64	F	61	67	SFAFIVA	0.703
65	I	62	68	FAFIVAT	0.636
66	V	63	69	AFIVATM	0.636
67	A	64	70	FIVATMA	0.636
68	T	65	71	IVATMAQ	0.69
69	M	66	72	VATMAQA	0.717
70	A	67	73	ATMAQAL	0.73
71	Q	68	74	TMAQALG	0.859
72	A	69	75	MAQALGH	0.857
73	L	70	76	AQALGHV	0.843
74	G	71	77	QALGHVS	0.953
75	H	72	78	ALGHVSG	1036
76	V	73	79	LGHVSGA	1036
77	S	74	80	GHVSGAH	1087
78	G	75	81	HVSGAHI	0.931
79	A	76	82	VSGAHIN	1019
80	H	77	83	SGAHINP	1164
81	I	78	84	GAHINPA	1054
82	N	79	85	AHINPAV	0.903
83	P	80	86	HINPAVT	0.946
84	A	81	87	INPAVTM	0.896
85	V	82	88	NPAVTMG	1051
86	T	83	89	PAVTMGM	0.914
87	M	84	90	AVTMGML	0.781
88	G	85	91	VTMGMLC	0.857
89	M	86	92	TMGMLCV	0.857
90	L	87	93	MGMLCVG	0.943
91	C	88	94	GMLCVGH	0.993
92	V	89	95	MLCVGHI	0.837
93	G	90	96	LCVGHIS	0.956
94	H	91	97	CVGHISI	0.939
95	I	92	98	VGHISIL	0.853
96	S	93	99	GHISILR	0.917
97	I	94	100	HISILRA	0.789
98	L	95	101	ISILRAF	0.739
99	R	96	102	SILRAFF	0.757
100	A	97	103	ILRAFFY	0.716
101	F	98	104	LRAFFYI	0.716
102	F	99	105	RAFFYIC	0.801
103	Y	100	106	AFFYICS	0.87
104	I	101	107	FFYICSQ	0.916
105	C	102	108	FYICSQL	0.914
106	S	103	109	YICSQLI	0.896
107	Q	104	110	ICSQLIG	0.956
108	L	105	111	CSQLIGG	1111
109	I	106	112	SQLIGGI	1009
110	G	107	113	QLIGGIT	0.941
111	G	108	114	LIGGITG	1024
112	I	109	115	IGGITGA	1034
113	T	110	116	GGITGAA	1061
114	G	111	117	GITGAAV	0.91
115	A	112	118	ITGAAVL	0.771
116	A	113	119	TGAAVLR	0.84
117	V	114	120	GAAVLRA	0.797
118	L	115	121	AAVLRAV	0.646
119	R	116	122	AVLRAVT	0.689
120	A	117	123	VLRAVTP	0.811
121	V	118	124	LRAVTPE	0.846
122	T	119	125	RAVTPEE	0.867
123	P	120	126	AVTPEER	0.867
124	E	121	127	VTPEERQ	0.913
125	E	122	128	TPEERQG	1064
126	R	123	129	PEERQGL	1011
127	Q	124	130	EERQGLL	0.879
128	G	125	131	ERQGLLG	0.996
129	L	126	132	RQGLLGG	1113
130	L	127	133	QGLLGGT	1114
131	G	128	134	GLLGGTA	1069
132	G	129	135	LLGGTAL	0.93
133	T	130	136	LGGTALS	1.05
134	A	131	137	GGTALSE	1071
135	L	132	138	GTALSEG	1071
136	S	133	139	TALSEGV	0.92
137	E	134	140	ALSEGVT	0.92
138	G	135	141	LSEGVTP	1043
139	V	136	142	SEGVTPF	1044
140	T	137	143	EGVTPFQ	0.98
141	P	138	144	GVTPFQG	1097
142	F	139	145	VTPFQGV	0.946
143	Q	140	146	TPFQGVV	0.946
144	G	141	147	PFQGVVV	0.88
145	V	142	148	FQGVVVE	0.769
146	V	143	149	QGVVVEL	0.767
147	V	144	150	GVVVELV	0.699
148	E	145	151	VVVELVI	0.543
149	L	146	152	VVELVIT	0.609
150	V	147	153	VELVITF	0.623
151	I	148	154	ELVITFI	0.619
152	T	149	155	LVITFIL	0.597
153	F	150	156	VITFILV	0.584
154	I	151	157	ITFILVL	0.597
155	L	152	158	TFILVLT	0.667
156	V	153	159	FILVLTV	0.601
157	L	154	160	ILVLTVF	0.601
158	T	155	161	LVLTVFA	0.629
159	V	156	162	VLTVFAV	0.616
160	F	157	163	LTVFAVC	0.714
161	A	158	164	TVFAVCD	0.839
162	V	159	165	VFAVCDQ	0.841
163	C	160	166	FAVCDQN	0.993
164	D	161	167	AVCDQNR	1043
165	Q	162	168	VCDQNRL	1033
166	N	163	169	CDQNRLD	1.17
167	R	164	170	DQNRLDV	1071
168	L	165	171	QNRLDVL	0.947
169	D	166	172	NRLDVLG	1.03
170	V	167	173	RLDVLGS	1011
171	L	168	174	LDVLGSP	1093
172	G	169	175	DVLGSPP	1226
173	S	170	176	VLGSPPL	1101
174	P	171	177	LGSPPLA	1124
175	P	172	178	GSPPLAI	1107
176	L	173	179	SPPLAIG	1107
177	A	174	180	PPLAIGL	0.987
178	I	175	181	PLAIGLA	0.864
179	G	176	182	LAIGLAV	0.719
180	L	177	183	AIGLAVG	0.857
181	A	178	184	IGLAVGA	0.857
182	V	179	185	GLAVGAG	1013
183	G	180	186	LAVGAGH	0.926
184	A	181	187	AVGAGHL	0.926
185	G	182	188	VGAGHLM	0.917
186	H	183	189	GAGHLMV	0.917
187	L	184	190	AGHLMVI	0.761
188	M	185	191	GHLMVIG	0.89
189	V	186	192	HLMVIGY	0.83
190	I	187	193	LMVIGYT	0.831
191	G	188	194	MVIGYTG	0.97
192	Y	189	195	VIGYTGA	0.979
193	T	190	196	IGYTGAS	1111
194	G	191	197	GYTGASM	1.13
195	A	192	198	YTGASMN	1.13
196	S	193	199	TGASMNT	1104
197	M	194	200	GASMNTA	1061
198	N	195	201	ASMNTAR	0.974
199	T	196	202	SMNTART	1017
200	A	197	203	MNTARTF	0.899
201	R	198	204	NTARTFG	1036
202	T	199	205	TARTFGP	1.03
203	F	200	206	ARTFGPA	0.987
204	G	201	207	RTFGPAV	0.964
205	P	202	208	TFGPAVI	0.896
206	A	203	209	FGPAVIS	0.963
207	V	204	210	GPAVISG	1.1
208	I	205	211	PAVISGA	0.971
209	S	206	212	AVISGAF	0.84
210	G	207	213	VISGAFD	0.954
211	A	208	214	ISGAFDD	1091
212	F	209	215	SGAFDDH	1.16
213	D	210	216	GAFDDHW	1093
214	D	211	217	AFDDHWV	0.941
215	H	212	218	FDDHWVY	1.01
216	W	213	219	DDHWVYW	1061
217	V	214	220	DHWVYWL	0.937
218	Y	215	221	HWVYWLG	0.951
219	W	216	222	WVYWLGP	1033
220	L	217	223	VYWLGPI	0.963
221	G	218	224	YWLGPIG	1114
222	P	219	225	WLGPIGG	1174
223	I	220	226	LGPIGGG	1.26
224	G	221	227	GPIGGGI	1243
225	G	222	228	PIGGGIL	1104
226	G	223	229	IGGGILA	0.981
227	I	224	230	GGGILAG	1137
228	L	225	231	GGILAGF	1.0
229	A	226	232	GILAGFV	0.849
230	G	227	233	ILAGFVY	0.789
231	F	228	234	LAGFVYQ	0.861
232	V	229	235	AGFVYQY	0.94
233	Y	230	236	GFVYQYV	0.917
234	Q	231	237	FVYQYVL	0.779
235	Y	232	238	VYQYVLS	0.897
236	V	233	239	YQYVLSA	0.92
237	L	234	240	QYVLSAP	0.974
238	S	235	241	YVLSAPP	1051
239	A	236	242	VLSAPPI	0.956
240	P	237	243	LSAPPIS	1089
241	P	238	244	SAPPISF	1.09
242	I	239	245	APPISFE	0.991
243	S	240	246	PPISFEA	0.991
244	F	241	247	PISFEAL	0.859
245	E	242	248	ISFEALD	0.85
246	A	243	249	SFEALDK	0.927
247	L	244	250	FEALDKA	0.817
248	D	245	251	EALDKAQ	0.871
249	K	246	252	ALDKAQL	0.85
250	A	247	253	LDKAQLA	0.85
251	Q	248	254	DKAQLAC	0.936
252	L	249	255	KAQLACL	0.811
253	A	250	256	AQLACLA	0.761
254	C	251	257	QLACLAR	0.803
255	L	252	258	LACLARF	0.749
256	A	253	259	ACLARFH	0.8
257	R	254	260	CLARFHN	0.929
258	F	255	261	LARFHNK	0.903
259	H	256	262	ARFHNKE	0.924
260	N	257	263	RFHNKEA	0.924
261	K	258	264	FHNKEAV	0.86
262	E	259	265	HNKEAVE	0.88
263	A	260	266	NKEAVED	0.953
264	V	261	267	KEAVEDR	0.866
265	E	262	268	EAVEDRT	0.859
266	D	263	269	AVEDRTT	0.89
267	R	264	270	VEDRTTA	0.89
268	T	265	271	EDRTTAI	0.886

## Sheet: Karplus (flex.)
Position	Residue	Start	End	Peptide	Score
4	V	1	7	MGRVRQF	1007
5	R	2	8	GRVRQFR	1008
6	Q	3	9	RVRQFRS	1005
7	F	4	10	VRQFRSI	0.995
8	R	5	11	RQFRSIF	0.989
9	S	6	12	QFRSIFG	0.974
10	I	7	13	FRSIFGI	0.955
11	F	8	14	RSIFGID	0.957
12	G	9	15	SIFGIDE	0.967
13	I	10	16	IFGIDEL	0.987
14	D	11	17	FGIDELS	1005
15	E	12	18	GIDELSA	1008
16	L	13	19	IDELSAT	1004
17	S	14	20	DELSATS	1009
18	A	15	21	ELSATST	1028
19	T	16	22	LSATSTL	1044
20	S	17	23	SATSTLW	1052
21	T	18	24	ATSTLWK	1041
22	L	19	25	TSTLWKS	1022
23	W	20	26	STLWKSM	1002
24	K	21	27	TLWKSMI	0.987
25	S	22	28	LWKSMIA	0.969
26	M	23	29	WKSMIAE	0.945
27	I	24	30	KSMIAEY	0.93
28	A	25	31	SMIAEYI	0.92
29	E	26	32	MIAEYIG	0.925
30	Y	27	33	IAEYIGT	0.943
31	I	28	34	AEYIGTA	0.959
32	G	29	35	EYIGTAM	0.968
33	T	30	36	YIGTAML	0.963
34	A	31	37	IGTAMLV	0.943
35	M	32	38	GTAMLVF	0.919
36	L	33	39	TAMLVFI	0.905
37	V	34	40	AMLVFIA	0.897
38	F	35	41	MLVFIAC	0.895
39	I	36	42	LVFIACG	0.903
40	A	37	43	VFIACGT	0.918
41	C	38	44	FIACGTC	0.94
42	G	39	45	IACGTCT	0.974
43	T	40	46	ACGTCTN	0.998
44	C	41	47	CGTCTNW	1003
45	T	42	48	GTCTNWG	1009
46	N	43	49	TCTNWGR	1003
47	W	44	50	CTNWGRG	1008
48	G	45	51	TNWGRGG	1034
49	R	46	52	NWGRGGE	1059
50	G	47	53	WGRGGEP	1085
51	G	48	54	GRGGEPS	1097
52	E	49	55	RGGEPSI	1.08
53	P	50	56	GGEPSIA	1.05
54	S	51	57	GEPSIAQ	1009
55	I	52	58	EPSIAQI	0.964
56	A	53	59	PSIAQIA	0.934
57	Q	54	60	SIAQIAL	0.914
58	I	55	61	IAQIALS	0.908
59	A	56	62	AQIALSF	0.913
60	L	57	63	QIALSFA	0.917
61	S	58	64	IALSFAF	0.918
62	F	59	65	ALSFAFI	0.913
63	A	60	66	LSFAFIV	0.907
64	F	61	67	SFAFIVA	0.904
65	I	62	68	FAFIVAT	0.906
66	V	63	69	AFIVATM	0.91
67	A	64	70	FIVATMA	0.916
68	T	65	71	IVATMAQ	0.915
69	M	66	72	VATMAQA	0.913
70	A	67	73	ATMAQAL	0.918
71	Q	68	74	TMAQALG	0.92
72	A	69	75	MAQALGH	0.93
73	L	70	76	AQALGHV	0.937
74	G	71	77	QALGHVS	0.944
75	H	72	78	ALGHVSG	0.96
76	V	73	79	LGHVSGA	0.972
77	S	74	80	GHVSGAH	0.982
78	G	75	81	HVSGAHI	0.977
79	A	76	82	VSGAHIN	0.963
80	H	77	83	SGAHINP	0.957
81	I	78	84	GAHINPA	0.957
82	N	79	85	AHINPAV	0.969
83	P	80	86	HINPAVT	0.979
84	A	81	87	INPAVTM	0.971
85	V	82	88	NPAVTMG	0.959
86	T	83	89	PAVTMGM	0.94
87	M	84	90	AVTMGML	0.925
88	G	85	91	VTMGMLC	0.918
89	M	86	92	TMGMLCV	0.912
90	L	87	93	MGMLCVG	0.913
91	C	88	94	GMLCVGH	0.918
92	V	89	95	MLCVGHI	0.922
93	G	90	96	LCVGHIS	0.925
94	H	91	97	CVGHISI	0.923
95	I	92	98	VGHISIL	0.919
96	S	93	99	GHISILR	0.918
97	I	94	100	HISILRA	0.919
98	L	95	101	ISILRAF	0.923
99	R	96	102	SILRAFF	0.923
100	A	97	103	ILRAFFY	0.919
101	F	98	104	LRAFFYI	0.909
102	F	99	105	RAFFYIC	0.895
103	Y	100	106	AFFYICS	0.893
104	I	101	107	FFYICSQ	0.906
105	C	102	108	FYICSQL	0.93
106	S	103	109	YICSQLI	0.957
107	Q	104	110	ICSQLIG	0.975
108	L	105	111	CSQLIGG	0.981
109	I	106	112	SQLIGGI	0.985
110	G	107	113	QLIGGIT	0.998
111	G	108	114	LIGGITG	1012
112	I	109	115	IGGITGA	1018
113	T	110	116	GGITGAA	1015
114	G	111	117	GITGAAV	0.994
115	A	112	118	ITGAAVL	0.967
116	A	113	119	TGAAVLR	0.944
117	V	114	120	GAAVLRA	0.931
118	L	115	121	AAVLRAV	0.927
119	R	116	122	AVLRAVT	0.934
120	A	117	123	VLRAVTP	0.954
121	V	118	124	LRAVTPE	0.979
122	T	119	125	RAVTPEE	1014
123	P	120	126	AVTPEER	1043
124	E	121	127	VTPEERQ	1068
125	E	122	128	TPEERQG	1082
126	R	123	129	PEERQGL	1076
127	Q	124	130	EERQGLL	1067
128	G	125	131	ERQGLLG	1043
129	L	126	132	RQGLLGG	1028
130	L	127	133	QGLLGGT	1027
131	G	128	134	GLLGGTA	1031
132	G	129	135	LLGGTAL	1036
133	T	130	136	LGGTALS	1.03
134	A	131	137	GGTALSE	1021
135	L	132	138	GTALSEG	1019
136	S	133	139	TALSEGV	1023
137	E	134	140	ALSEGVT	1033
138	G	135	141	LSEGVTP	1.04
139	V	136	142	SEGVTPF	1034
140	T	137	143	EGVTPFQ	1029
141	P	138	144	GVTPFQG	1024
142	F	139	145	VTPFQGV	1.01
143	Q	140	146	TPFQGVV	1001
144	G	141	147	PFQGVVV	0.983
145	V	142	148	FQGVVVE	0.959
146	V	143	149	QGVVVEL	0.947
147	V	144	150	GVVVELV	0.936
148	E	145	151	VVVELVI	0.929
149	L	146	152	VVELVIT	0.929
150	V	147	153	VELVITF	0.924
151	I	148	154	ELVITFI	0.916
152	T	149	155	LVITFIL	0.912
153	F	150	156	VITFILV	0.907
154	I	151	157	ITFILVL	0.908
155	L	152	158	TFILVLT	0.916
156	V	153	159	FILVLTV	0.922
157	L	154	160	ILVLTVF	0.929
158	T	155	161	LVLTVFA	0.929
159	V	156	162	VLTVFAV	0.924
160	F	157	163	LTVFAVC	0.915
161	A	158	164	TVFAVCD	0.918
162	V	159	165	VFAVCDQ	0.941
163	C	160	166	FAVCDQN	0.979
164	D	161	167	AVCDQNR	1029
165	Q	162	168	VCDQNRL	1061
166	N	163	169	CDQNRLD	1061
167	R	164	170	DQNRLDV	1036
168	L	165	171	QNRLDVL	0.998
169	D	166	172	NRLDVLG	0.972
170	V	167	173	RLDVLGS	0.975
171	L	168	174	LDVLGSP	0.998
172	G	169	175	DVLGSPP	1034
173	S	170	176	VLGSPPL	1059
174	P	171	177	LGSPPLA	1053
175	P	172	178	GSPPLAI	1028
176	L	173	179	SPPLAIG	0.985
177	A	174	180	PPLAIGL	0.947
178	I	175	181	PLAIGLA	0.927
179	G	176	182	LAIGLAV	0.919
180	L	177	183	AIGLAVG	0.921
181	A	178	184	IGLAVGA	0.929
182	V	179	185	GLAVGAG	0.938
183	G	180	186	LAVGAGH	0.946
184	A	181	187	AVGAGHL	0.955
185	G	182	188	VGAGHLM	0.943
186	H	183	189	GAGHLMV	0.929
187	L	184	190	AGHLMVI	0.91
188	M	185	191	GHLMVIG	0.891
189	V	186	192	HLMVIGY	0.896
190	I	187	193	LMVIGYT	0.911
191	G	188	194	MVIGYTG	0.939
192	Y	189	195	VIGYTGA	0.974
193	T	190	196	IGYTGAS	0.997
194	G	191	197	GYTGASM	1005
195	A	192	198	YTGASMN	1001
196	S	193	199	TGASMNT	0.991
197	M	194	200	GASMNTA	0.99
198	N	195	201	ASMNTAR	1001
199	T	196	202	SMNTART	1017
200	A	197	203	MNTARTF	1024
201	R	198	204	NTARTFG	1025
202	T	199	205	TARTFGP	1024
203	F	200	206	ARTFGPA	1013
204	G	201	207	RTFGPAV	1009
205	P	202	208	TFGPAVI	0.996
206	A	203	209	FGPAVIS	0.977
207	V	204	210	GPAVISG	0.97
208	I	205	211	PAVISGA	0.966
209	S	206	212	AVISGAF	0.973
210	G	207	213	VISGAFD	0.985
211	A	208	214	ISGAFDD	0.994
212	F	209	215	SGAFDDH	1001
213	D	210	216	GAFDDHW	1.0
214	D	211	217	AFDDHWV	0.986
215	H	212	218	FDDHWVY	0.952
216	W	213	219	DDHWVYW	0.909
217	V	214	220	DHWVYWL	0.883
218	Y	215	221	HWVYWLG	0.876
219	W	216	222	WVYWLGP	0.9
220	L	217	223	VYWLGPI	0.946
221	G	218	224	YWLGPIG	0.987
222	P	219	225	WLGPIGG	1026
223	I	220	226	LGPIGGG	1048
224	G	221	227	GPIGGGI	1049
225	G	222	228	PIGGGIL	1038
226	G	223	229	IGGGILA	1009
227	I	224	230	GGGILAG	0.975
228	L	225	231	GGILAGF	0.949
229	A	226	232	GILAGFV	0.93
230	G	227	233	ILAGFVY	0.922
231	F	228	234	LAGFVYQ	0.92
232	V	229	235	AGFVYQY	0.917
233	Y	230	236	GFVYQYV	0.915
234	Q	231	237	FVYQYVL	0.915
235	Y	232	238	VYQYVLS	0.921
236	V	233	239	YQYVLSA	0.932
237	L	234	240	QYVLSAP	0.954
238	S	235	241	YVLSAPP	0.982
239	A	236	242	VLSAPPI	1012
240	P	237	243	LSAPPIS	1028
241	P	238	244	SAPPISF	1024
242	I	239	245	APPISFE	1002
243	S	240	246	PPISFEA	0.972
244	F	241	247	PISFEAL	0.952
245	E	242	248	ISFEALD	0.951
246	A	243	249	SFEALDK	0.969
247	L	244	250	FEALDKA	0.997
248	D	245	251	EALDKAQ	1017
249	K	246	252	ALDKAQL	1.02
250	A	247	253	LDKAQLA	1001
251	Q	248	254	DKAQLAC	0.969
252	L	249	255	KAQLACL	0.944
253	A	250	256	AQLACLA	0.927
254	C	251	257	QLACLAR	0.921
255	L	252	258	LACLARF	0.922
256	A	253	259	ACLARFH	0.923
257	R	254	260	CLARFHN	0.928
258	F	255	261	LARFHNK	0.945
259	H	256	262	ARFHNKE	0.971
260	N	257	263	RFHNKEA	0.994
261	K	258	264	FHNKEAV	1008
262	E	259	265	HNKEAVE	1007
263	A	260	266	NKEAVED	0.998
264	V	261	267	KEAVEDR	0.995
265	E	262	268	EAVEDRT	1006
266	D	263	269	AVEDRTT	1022
267	R	264	270	VEDRTTA	1032

## Sheet: Parker (hidroph.)
Position	Residue	Start	End	Peptide	Score
4	V	1	7	MGRVRQF	0.429
5	R	2	8	GRVRQFR	1629
6	Q	3	9	RVRQFRS	1743
7	F	4	10	VRQFRSI	0.0
8	R	5	11	RQFRSIF	-0.786
9	S	6	12	QFRSIFG	-0.571
10	I	7	13	FRSIFGI	-2571
11	F	8	14	RSIFGID	0.171
12	G	9	15	SIFGIDE	0.686
13	I	10	16	IFGIDEL	-1557
14	D	11	17	FGIDELS	0.514
15	E	12	18	GIDELSA	2129
16	L	13	19	IDELSAT	2057
17	S	14	20	DELSATS	4129
18	A	15	21	ELSATST	3443
19	T	16	22	LSATSTL	1014
20	S	17	23	SATSTLW	0.9
21	T	18	24	ATSTLWK	0.786
22	L	19	25	TSTLWKS	1414
23	W	20	26	STLWKSM	0.071
24	K	21	27	TLWKSMI	-2.0
25	S	22	28	LWKSMIA	-2443
26	M	23	29	WKSMIAE	-0.014
27	I	24	30	KSMIAEY	1143
28	A	25	31	SMIAEYI	-0.814
29	E	26	32	MIAEYIG	-0.929
30	Y	27	33	IAEYIGT	0.414
31	I	28	34	AEYIGTA	1857
32	G	29	35	EYIGTAM	0.957
33	T	30	36	YIGTAML	-1471
34	A	31	37	IGTAMLV	-1729
35	M	32	38	GTAMLVF	-1.9
36	L	33	39	TAMLVFI	-3857
37	V	34	40	AMLVFIA	-4.3
38	F	35	41	MLVFIAC	-4.4
39	I	36	42	LVFIACG	-2986
40	A	37	43	VFIACGT	-0.929
41	C	38	44	FIACGTC	-0.2
42	G	39	45	IACGTCT	1857
43	T	40	46	ACGTCTN	4.0
44	C	41	47	CGTCTNW	2271
45	T	42	48	GTCTNWG	2886
46	N	43	49	TCTNWGR	2671
47	W	44	50	CTNWGRG	2743
48	G	45	51	TNWGRGG	3357
49	R	46	52	NWGRGGE	3729
50	G	47	53	WGRGGEP	3029
51	G	48	54	GRGGEPS	5386
52	E	49	55	RGGEPSI	3429
53	P	50	56	GGEPSIA	3129
54	S	51	57	GEPSIAQ	3171
55	I	52	58	EPSIAQI	1214
56	A	53	59	PSIAQIA	0.4
57	Q	54	60	SIAQIAL	-1214
58	I	55	61	IAQIALS	-1214
59	A	56	62	AQIALSF	-1386
60	L	57	63	QIALSFA	-1386
61	S	58	64	IALSFAF	-3557
62	F	59	65	ALSFAFI	-3557
63	A	60	66	LSFAFIV	-4386
64	F	61	67	SFAFIVA	-2771
65	I	62	68	FAFIVAT	-2957
66	V	63	69	AFIVATM	-2243
67	A	64	70	FIVATMA	-2243
68	T	65	71	IVATMAQ	-0.071
69	M	66	72	VATMAQA	1371
70	A	67	73	ATMAQAL	0.586
71	Q	68	74	TMAQALG	1.1
72	A	69	75	MAQALGH	0.657
73	L	70	76	AQALGHV	0.729
74	G	71	77	QALGHVS	1357
75	H	72	78	ALGHVSG	1314
76	V	73	79	LGHVSGA	1314
77	S	74	80	GHVSGAH	2929
78	G	75	81	HVSGAHI	0.971
79	A	76	82	VSGAHIN	1671
80	H	77	83	SGAHINP	2.5
81	I	78	84	GAHINPA	1871
82	N	79	85	AHINPAV	0.529
83	P	80	86	HINPAVT	0.971
84	A	81	87	INPAVTM	0.071
85	V	82	88	NPAVTMG	2029
86	T	83	89	PAVTMGM	0.429
87	M	84	90	AVTMGML	-1186
88	G	85	91	VTMGMLC	-1286
89	M	86	92	TMGMLCV	-1286
90	L	87	93	MGMLCVG	-1214
91	C	88	94	GMLCVGH	-0.314
92	V	89	95	MLCVGHI	-2271
93	G	90	96	LCVGHIS	-0.743
94	H	91	97	CVGHISI	-0.571
95	I	92	98	VGHISIL	-2086
96	S	93	99	GHISILR	-0.957
97	I	94	100	HISILRA	-1471
98	L	95	101	ISILRAF	-3086
99	R	96	102	SILRAFF	-3257
100	A	97	103	ILRAFFY	-4457
101	F	98	104	LRAFFYI	-4457
102	F	99	105	RAFFYIC	-2943
103	Y	100	106	AFFYICS	-2614
104	I	101	107	FFYICSQ	-2057
105	C	102	108	FYICSQL	-2057
106	S	103	109	YICSQLI	-1886
107	Q	104	110	ICSQLIG	-0.8
108	L	105	111	CSQLIGG	1157
109	I	106	112	SQLIGGI	-0.186
110	G	107	113	QLIGGIT	-0.371
111	G	108	114	LIGGITG	-0.414
112	I	109	115	IGGITGA	1.2
113	T	110	116	GGITGAA	2643
114	G	111	117	GITGAAV	1.3
115	A	112	118	ITGAAVL	-0.829
116	A	113	119	TGAAVLR	0.914
117	V	114	120	GAAVLRA	0.471
118	L	115	121	AAVLRAV	-0.871
119	R	116	122	AVLRAVT	-0.429
120	A	117	123	VLRAVTP	-0.429
121	V	118	124	LRAVTPE	1214
122	T	119	125	RAVTPEE	3643
123	P	120	126	AVTPEER	3643
124	E	121	127	VTPEERQ	4.2
125	E	122	128	TPEERQG	5543
126	R	123	129	PEERQGL	3486
127	Q	124	130	EERQGLL	1871
128	G	125	131	ERQGLLG	1571
129	L	126	132	RQGLLGG	1271
130	L	127	133	QGLLGGT	1414
131	G	128	134	GLLGGTA	0.857
132	G	129	135	LLGGTAL	-1271
133	T	130	136	LGGTALS	0.971
134	A	131	137	GGTALSE	3.4
135	L	132	138	GTALSEG	3.4
136	S	133	139	TALSEGV	2057
137	E	134	140	ALSEGVT	2057
138	G	135	141	LSEGVTP	2057
139	V	136	142	SEGVTPF	2057
140	T	137	143	EGVTPFQ	1986
141	P	138	144	GVTPFQG	1686
142	F	139	145	VTPFQGV	0.343
143	Q	140	146	TPFQGVV	0.343
144	G	141	147	PFQGVVV	-0.929
145	V	142	148	FQGVVVE	-0.114
146	V	143	149	QGVVVEL	-0.114
147	V	144	150	GVVVELV	-1.5
148	E	145	151	VVVELVI	-3457
149	L	146	152	VVELVIT	-2186
150	V	147	153	VELVITF	-2971
151	I	148	154	ELVITFI	-3586
152	T	149	155	LVITFIL	-6014
153	F	150	156	VITFILV	-5229
154	I	151	157	ITFILVL	-6014
155	L	152	158	TFILVLT	-4129
156	V	153	159	FILVLTV	-5.4
157	L	154	160	ILVLTVF	-5.4
158	T	155	161	LVLTVFA	-3957
159	V	156	162	VLTVFAV	-3171
160	F	157	163	LTVFAVC	-2443
161	A	158	164	TVFAVCD	0.3
162	V	159	165	VFAVCDQ	0.414
163	C	160	166	FAVCDQN	1943
164	D	161	167	AVCDQNR	3857
165	Q	162	168	VCDQNRL	2243
166	N	163	169	CDQNRLD	4.2
167	R	164	170	DQNRLDV	3471
168	L	165	171	QNRLDVL	0.729
169	D	166	172	NRLDVLG	0.686
170	V	167	173	RLDVLGS	0.614
171	L	168	174	LDVLGSP	0.314
172	G	169	175	DVLGSPP	1929
173	S	170	176	VLGSPPL	-0.814
174	P	171	177	LGSPPLA	0.014
175	P	172	178	GSPPLAI	0.186
176	L	173	179	SPPLAIG	0.186
177	A	174	180	PPLAIGL	-2057
178	I	175	181	PLAIGLA	-2057
179	G	176	182	LAIGLAV	-2886
180	L	177	183	AIGLAVG	-0.757
181	A	178	184	IGLAVGA	-0.757
182	V	179	185	GLAVGAG	1.2
183	G	180	186	LAVGAGH	0.686
184	A	181	187	AVGAGHL	0.686
185	G	182	188	VGAGHLM	-0.214
186	H	183	189	GAGHLMV	-0.214
187	L	184	190	AGHLMVI	-2171
188	M	185	191	GHLMVIG	-1657
189	V	186	192	HLMVIGY	-2743
190	I	187	193	LMVIGYT	-2.3
191	G	188	194	MVIGYTG	-0.171
192	Y	189	195	VIGYTGA	0.729
193	T	190	196	IGYTGAS	2186
194	G	191	197	GYTGASM	2729
195	A	192	198	YTGASMN	2914
196	S	193	199	TGASMNT	3929
197	M	194	200	GASMNTA	3486
198	N	195	201	ASMNTAR	3271
199	T	196	202	SMNTART	3714
200	A	197	203	MNTARTF	1471
201	R	198	204	NTARTFG	2886
202	T	199	205	TARTFGP	2186
203	F	200	206	ARTFGPA	1743
204	G	201	207	RTFGPAV	0.914
205	P	202	208	TFGPAVI	-0.829
206	A	203	209	FGPAVIS	-0.643
207	V	204	210	GPAVISG	1486
208	I	205	211	PAVISGA	0.971
209	S	206	212	AVISGAF	-0.643
210	G	207	213	VISGAFD	0.486
211	A	208	214	ISGAFDD	2443
212	F	209	215	SGAFDDH	3886
213	D	210	216	GAFDDHW	1529
214	D	211	217	AFDDHWV	0.186
215	H	212	218	FDDHWVY	-0.386
216	W	213	219	DDHWVYW	-0.5
217	V	214	220	DHWVYWL	-3243
218	Y	215	221	HWVYWLG	-3857
219	W	216	222	WVYWLGP	-3857
220	L	217	223	VYWLGPI	-3571
221	G	218	224	YWLGPIG	-2229
222	P	219	225	WLGPIGG	-1143
223	I	220	226	LGPIGGG	1.1
224	G	221	227	GPIGGGI	1271
225	G	222	228	PIGGGIL	-0.857
226	G	223	229	IGGGILA	-0.857
227	I	224	230	GGGILAG	1.1
228	L	225	231	GGILAGF	-1029
229	A	226	232	GILAGFV	-2371
230	G	227	233	ILAGFVY	-3457
231	F	228	234	LAGFVYQ	-1457
232	V	229	235	AGFVYQY	-0.414
233	Y	230	236	GFVYQYV	-1243
234	Q	231	237	FVYQYVL	-3371
235	Y	232	238	VYQYVLS	-1129
236	V	233	239	YQYVLSA	-0.3
237	L	234	240	QYVLSAP	0.271
238	S	235	241	YVLSAPP	-0.286
239	A	236	242	VLSAPPI	-1157
240	P	237	243	LSAPPIS	0.3
241	P	238	244	SAPPISF	0.3
242	I	239	245	APPISFE	0.486
243	S	240	246	PPISFEA	0.486
244	F	241	247	PISFEAL	-1129
245	E	242	248	ISFEALD	0.0
246	A	243	249	SFEALDK	1957
247	L	244	250	FEALDKA	1329
248	D	245	251	EALDKAQ	3.5
249	K	246	252	ALDKAQL	1071
250	A	247	253	LDKAQLA	1071
251	Q	248	254	DKAQLAC	2586
252	L	249	255	KAQLACL	-0.157
253	A	250	256	AQLACLA	-0.671
254	C	251	257	QLACLAR	-0.371
255	L	252	258	LACLARF	-2543
256	A	253	259	ACLARFH	-0.929
257	R	254	260	CLARFHN	-0.229
258	F	255	261	LARFHNK	0.386
259	H	256	262	ARFHNKE	2814
260	N	257	263	RFHNKEA	2814
261	K	258	264	FHNKEAV	1686
262	E	259	265	HNKEAVE	4114
263	A	260	266	NKEAVED	5243
264	V	261	267	KEAVEDR	4843
265	E	262	268	EAVEDRT	4771
266	D	263	269	AVEDRTT	4.4
267	R	264	270	VEDRTTA	4.4
268	T	265	271	EDRTTAI	3786

## Sheet: Kolaskar (antig.)
Position	Residue	Start	End	Peptide	Score
4	V	1	7	MGRVRQF	0.991
5	R	2	8	GRVRQFR	0.997
6	Q	3	9	RVRQFRS	1017
7	F	4	10	VRQFRSI	1057
8	R	5	11	RQFRSIF	1015
9	S	6	12	QFRSIFG	1015
10	I	7	13	FRSIFGI	1035
11	F	8	14	RSIFGID	1003
12	G	9	15	SIFGIDE	1.0
13	I	10	16	IFGIDEL	1034
14	D	11	17	FGIDELS	1014
15	E	12	18	GIDELSA	1.01
16	L	13	19	IDELSAT	1015
17	S	14	20	DELSATS	0.995
18	A	15	21	ELSATST	1001
19	T	16	22	LSATSTL	1058
20	S	17	23	SATSTLW	1007
21	T	18	24	ATSTLWK	0.995
22	L	19	25	TSTLWKS	0.988
23	W	20	26	STLWKSM	0.976
24	K	21	27	TLWKSMI	0.996
25	S	22	28	LWKSMIA	1018
26	M	23	29	WKSMIAE	0.961
27	I	24	30	KSMIAEY	0.999
28	A	25	31	SMIAEYI	1031
29	E	26	32	MIAEYIG	1011
30	Y	27	33	IAEYIGT	1023
31	I	28	34	AEYIGTA	1011
32	G	29	35	EYIGTAM	0.977
33	T	30	36	YIGTAML	1034
34	A	31	37	IGTAMLV	1065
35	M	32	38	GTAMLVF	1057
36	L	33	39	TAMLVFI	1096
37	V	34	40	AMLVFIA	1119
38	F	35	41	MLVFIAC	1168
39	I	36	42	LVFIACG	1175
40	A	37	43	VFIACGT	1126
41	C	38	44	FIACGTC	1131
42	G	39	45	IACGTCT	1105
43	T	40	46	ACGTCTN	1051
44	C	41	47	CGTCTNW	1026
45	T	42	48	GTCTNWG	0.95
46	N	43	49	TCTNWGR	0.949
47	W	44	50	CTNWGRG	0.944
48	G	45	51	TNWGRGG	0.868
49	R	46	52	NWGRGGE	0.859
50	G	47	53	WGRGGEP	0.9
51	G	48	54	GRGGEPS	0.917
52	E	49	55	RGGEPSI	0.957
53	P	50	56	GGEPSIA	0.984
54	S	51	57	GEPSIAQ	1005
55	I	52	58	EPSIAQI	1044
56	A	53	59	PSIAQIA	1075
57	Q	54	60	SIAQIAL	1101
58	I	55	61	IAQIALS	1101
59	A	56	62	AQIALSF	1093
60	L	57	63	QIALSFA	1093
61	S	58	64	IALSFAF	1103
62	F	59	65	ALSFAFI	1103
63	A	60	66	LSFAFIV	1149
64	F	61	67	SFAFIVA	1122
65	I	62	68	FAFIVAT	1108
66	V	63	69	AFIVATM	1.07
67	A	64	70	FIVATMA	1.07
68	T	65	71	IVATMAQ	1059
69	M	66	72	VATMAQA	1046
70	A	67	73	ATMAQAL	1027
71	Q	68	74	TMAQALG	1.0
72	A	69	75	MAQALGH	1028
73	L	70	76	AQALGHV	1108
74	G	71	77	QALGHVS	1.1
75	H	72	78	ALGHVSG	1.08
76	V	73	79	LGHVSGA	1.08
77	S	74	80	GHVSGAH	1.06
78	G	75	81	HVSGAHI	1099
79	A	76	82	VSGAHIN	1052
80	H	77	83	SGAHINP	1007
81	I	78	84	GAHINPA	1014
82	N	79	85	AHINPAV	1087
83	P	80	86	HINPAVT	1065
84	A	81	87	INPAVTM	1025
85	V	82	88	NPAVTMG	0.985
86	T	83	89	PAVTMGM	0.992
87	M	84	90	AVTMGML	1019
88	G	85	91	VTMGMLC	1069
89	M	86	92	TMGMLCV	1069
90	L	87	93	MGMLCVG	1064
91	C	88	94	GMLCVGH	1103
92	V	89	95	MLCVGHI	1143
93	G	90	96	LCVGHIS	1.17
94	H	91	97	CVGHISI	1156
95	I	92	98	VGHISIL	1133
96	S	93	99	GHISILR	1.06
97	I	94	100	HISILRA	1087
98	L	95	101	ISILRAF	1085
99	R	96	102	SILRAFF	1076
100	A	97	103	ILRAFFY	1097
101	F	98	104	LRAFFYI	1097
102	F	99	105	RAFFYIC	1121
103	Y	100	106	AFFYICS	1.14
104	I	101	107	FFYICSQ	1133
105	C	102	108	FYICSQL	1156
106	S	103	109	YICSQLI	1165
107	Q	104	110	ICSQLIG	1124
108	L	105	111	CSQLIGG	1084
109	I	106	112	SQLIGGI	1047
110	G	107	113	QLIGGIT	1032
111	G	108	114	LIGGITG	1012
112	I	109	115	IGGITGA	0.986
113	T	110	116	GGITGAA	0.973
114	G	111	117	GITGAAV	1046
115	A	112	118	ITGAAVL	1099
116	A	113	119	TGAAVLR	1.06
117	V	114	120	GAAVLRA	1082
118	L	115	121	AAVLRAV	1154
119	R	116	122	AVLRAVT	1132
120	A	117	123	VLRAVTP	1132
121	V	118	124	LRAVTPE	1056
122	T	119	125	RAVTPEE	0.999
123	P	120	126	AVTPEER	0.999
124	E	121	127	VTPEERQ	0.992
125	E	122	128	TPEERQG	0.92
126	R	123	129	PEERQGL	0.968
127	Q	124	130	EERQGLL	0.995
128	G	125	131	ERQGLLG	0.998
129	L	126	132	RQGLLGG	1001
130	L	127	133	QGLLGGT	1007
131	G	128	134	GLLGGTA	1014
132	G	129	135	LLGGTAL	1067
133	T	130	136	LGGTALS	1033
134	A	131	137	GGTALSE	0.976
135	L	132	138	GTALSEG	0.976
136	S	133	139	TALSEGV	1049
137	E	134	140	ALSEGVT	1049
138	G	135	141	LSEGVTP	1049
139	V	136	142	SEGVTPF	1026
140	T	137	143	EGVTPFQ	1027
141	P	138	144	GVTPFQG	1.03
142	F	139	145	VTPFQGV	1103
143	Q	140	146	TPFQGVV	1103
144	G	141	147	PFQGVVV	1.17
145	V	142	148	FQGVVVE	1.14
146	V	143	149	QGVVVEL	1163
147	V	144	150	GVVVELV	1215
148	E	145	151	VVVELVI	1255
149	L	146	152	VVELVIT	1187
150	V	147	153	VELVITF	1146
151	I	148	154	ELVITFI	1113
152	T	149	155	LVITFIL	1.17
153	F	150	156	VITFILV	1189
154	I	151	157	ITFILVL	1.17
155	L	152	158	TFILVLT	1135
156	V	153	159	FILVLTV	1203
157	L	154	160	ILVLTVF	1203
158	T	155	161	LVLTVFA	1.19
159	V	156	162	VLTVFAV	1209
160	F	157	163	LTVFAVC	1213
161	A	158	164	TVFAVCD	1158
162	V	159	165	VFAVCDQ	1173
163	C	160	166	FAVCDQN	1087
164	D	161	167	AVCDQNR	1056
165	Q	162	168	VCDQNRL	1082
166	N	163	169	CDQNRLD	1008
167	R	164	170	DQNRLDV	1004
168	L	165	171	QNRLDVL	1059
169	D	166	172	NRLDVLG	1039
170	V	167	173	RLDVLGS	1073
171	L	168	174	LDVLGSP	1.1
172	G	169	175	DVLGSPP	1073
173	S	170	176	VLGSPPL	1128
174	P	171	177	LGSPPLA	1083
175	P	172	178	GSPPLAI	1069
176	L	173	179	SPPLAIG	1069
177	A	174	180	PPLAIGL	1103
178	I	175	181	PLAIGLA	1103
179	G	176	182	LAIGLAV	1148
180	L	177	183	AIGLAVG	1094
181	A	178	184	IGLAVGA	1094
182	V	179	185	GLAVGAG	1055
183	G	180	186	LAVGAGH	1088
184	A	181	187	AVGAGHL	1088
185	G	182	188	VGAGHLM	1054
186	H	183	189	GAGHLMV	1054
187	L	184	190	AGHLMVI	1093
188	M	185	191	GHLMVIG	1066
189	V	186	192	HLMVIGY	1107
190	I	187	193	LMVIGYT	1079
191	G	188	194	MVIGYTG	1026
192	Y	189	195	VIGYTGA	1.06
193	T	190	196	IGYTGAS	1007
194	G	191	197	GYTGASM	0.96
195	A	192	198	YTGASMN	0.946
196	S	193	199	TGASMNT	0.91
197	M	194	200	GASMNTA	0.932
198	N	195	201	ASMNTAR	0.932
199	T	196	202	SMNTART	0.91
200	A	197	203	MNTARTF	0.921
201	R	198	204	NTARTFG	0.928
202	T	199	205	TARTFGP	0.969
203	F	200	206	ARTFGPA	0.991
204	G	201	207	RTFGPAV	1037
205	P	202	208	TFGPAVI	1077
206	A	203	209	FGPAVIS	1091
207	V	204	210	GPAVISG	1.06
208	I	205	211	PAVISGA	1088
209	S	206	212	AVISGAF	1091
210	G	207	213	VISGAFD	1063
211	A	208	214	ISGAFDD	0.989
212	F	209	215	SGAFDDH	0.983
213	D	210	216	GAFDDHW	0.966
214	D	211	217	AFDDHWV	1038
215	H	212	218	FDDHWVY	1052
216	W	213	219	DDHWVYW	1024
217	V	214	220	DHWVYWL	1079
218	Y	215	221	HWVYWLG	1.08
219	W	216	222	WVYWLGP	1074
220	L	217	223	VYWLGPI	1111
221	G	218	224	YWLGPIG	1038
222	P	219	225	WLGPIGG	0.997
223	I	220	226	LGPIGGG	0.995
224	G	221	227	GPIGGGI	0.981
225	G	222	228	PIGGGIL	1034
226	G	223	229	IGGGILA	1034
227	I	224	230	GGGILAG	0.995
228	L	225	231	GGILAGF	1026
229	A	226	232	GILAGFV	1098
230	G	227	233	ILAGFVY	1139
231	F	228	234	LAGFVYQ	1.12
232	V	229	235	AGFVYQY	1107
233	Y	230	236	GFVYQYV	1153
234	Q	231	237	FVYQYVL	1206
235	Y	232	238	VYQYVLS	1195
236	V	233	239	YQYVLSA	1149
237	L	234	240	QYVLSAP	1136
238	S	235	241	YVLSAPP	1143
239	A	236	242	VLSAPPI	1141
240	P	237	243	LSAPPIS	1088
241	P	238	244	SAPPISF	1066
242	I	239	245	APPISFE	1043
243	S	240	246	PPISFEA	1043
244	F	241	247	PISFEAL	1069
245	E	242	248	ISFEALD	1041
246	A	243	249	SFEALDK	1009
247	L	244	250	FEALDKA	1017
248	D	245	251	EALDKAQ	1006
249	K	246	252	ALDKAQL	1063
250	A	247	253	LDKAQLA	1063
251	Q	248	254	DKAQLAC	1086
252	L	249	255	KAQLACL	1141
253	A	250	256	AQLACLA	1.16
254	C	251	257	QLACLAR	1133
255	L	252	258	LACLARF	1143
256	A	253	259	ACLARFH	1123
257	R	254	260	CLARFHN	1082
258	F	255	261	LARFHNK	1013
259	H	256	262	ARFHNKE	0.956
260	N	257	263	RFHNKEA	0.956
261	K	258	264	FHNKEAV	1029
262	E	259	265	HNKEAVE	0.994
263	A	260	266	NKEAVED	0.96
264	V	261	267	KEAVEDR	0.974
265	E	262	268	EAVEDRT	0.971
266	D	263	269	AVEDRTT	0.979
267	R	264	270	VEDRTTA	0.979
268	T	265	271	EDRTTAI	0.946

## Sheet: BepiPred 2.0 Epit
Position	Residue	Score	Assignment
1	M	0.310666666667
2	G	0.376111111111
3	R	0.424888888889
4	V	0.496222222222
5	R	0.556	B
6	Q	0.558888888889	B
7	F	0.566111111111	B
8	R	0.557222222222	B
9	S	0.553333333333	B
10	I	0.555	B
11	F	0.555333333333	B
12	G	0.565777777778	B
13	I	0.566777777778	B
14	D	0.570888888889	B
15	E	0.567777777778	B
16	L	0.560222222222	B
17	S	0.561666666667	B
18	A	0.561444444444	B
19	T	0.530111111111	B
20	S	0.515333333333	B
21	T	0.501777777778	B
22	L	0.458444444444
23	W	0.435555555556
24	K	0.414444444444
25	S	0.388333333333
26	M	0.369
27	I	0.354
28	A	0.343888888889
29	E	0.324333333333
30	Y	0.312222222222
31	I	0.314666666667
32	G	0.308777777778
33	T	0.306333333333
34	A	0.301555555556
35	M	0.290555555556
36	L	0.272444444444
37	V	0.269555555556
38	F	0.270111111111
39	I	0.273
40	A	0.279555555556
41	C	0.281222222222
42	G	0.300111111111
43	T	0.335888888889
44	C	0.379333333333
45	T	0.433111111111
46	N	0.481111111111
47	W	0.525777777778	B
48	G	0.567444444444	B
49	R	0.600222222222	B
50	G	0.626555555556	B
51	G	0.635333333333	B
52	E	0.624555555556	B
53	P	0.612333333333	B
54	S	0.578222222222	B
55	I	0.541666666667	B
56	A	0.498222222222
57	Q	0.460333333333
58	I	0.428333333333
59	A	0.407
60	L	0.386888888889
61	S	0.36
62	F	0.329888888889
63	A	0.311666666667
64	F	0.306888888889
65	I	0.303444444444
66	V	0.291888888889
67	A	0.299777777778
68	T	0.302
69	M	0.31
70	A	0.328444444444
71	Q	0.358444444444
72	A	0.381555555556
73	L	0.398333333333
74	G	0.416555555556
75	H	0.430777777778
76	V	0.430666666667
77	S	0.427222222222
78	G	0.416777777778
79	A	0.404222222222
80	H	0.374555555556
81	I	0.351666666667
82	N	0.324777777778
83	P	0.314333333333
84	A	0.293111111111
85	V	0.278111111111
86	T	0.266888888889
87	M	0.265
88	G	0.283222222222
89	M	0.315555555556
90	L	0.356444444444
91	C	0.381111111111
92	V	0.406888888889
93	G	0.439
94	H	0.467444444444
95	I	0.495888888889
96	S	0.508222222222	B
97	I	0.5
98	L	0.483
99	R	0.458222222222
100	A	0.439777777778
101	F	0.403111111111
102	F	0.387111111111
103	Y	0.373333333333
104	I	0.358333333333
105	C	0.356555555556
106	S	0.351111111111
107	Q	0.343888888889
108	L	0.341222222222
109	I	0.343333333333
110	G	0.351555555556
111	G	0.347333333333
112	I	0.345
113	T	0.343555555556
114	G	0.321444444444
115	A	0.336555555556
116	A	0.346888888889
117	V	0.356444444444
118	L	0.370333333333
119	R	0.399222222222
120	A	0.432222222222
121	V	0.458444444444
122	T	0.485444444444
123	P	0.536555555556	B
124	E	0.561222222222	B
125	E	0.582555555556	B
126	R	0.613	B
127	Q	0.635	B
128	G	0.626444444444	B
129	L	0.620888888889	B
130	L	0.610222222222	B
131	G	0.597	B
132	G	0.585111111111	B
133	T	0.590444444444	B
134	A	0.583555555556	B
135	L	0.573333333333	B
136	S	0.573888888889	B
137	E	0.581888888889	B
138	G	0.574333333333	B
139	V	0.577888888889	B
140	T	0.566444444444	B
141	P	0.541111111111	B
142	F	0.500222222222	B
143	Q	0.471666666667
144	G	0.433666666667
145	V	0.391666666667
146	V	0.360888888889
147	V	0.334333333333
148	E	0.289444444444
149	L	0.274111111111
150	V	0.261222222222
151	I	0.236555555556
152	T	0.223222222222
153	F	0.217555555556
154	I	0.213666666667
155	L	0.198111111111
156	V	0.199666666667
157	L	0.213
158	T	0.217888888889
159	V	0.226555555556
160	F	0.268
161	A	0.314888888889
162	V	0.363
163	C	0.422222222222
164	D	0.472111111111
165	Q	0.520333333333	B
166	N	0.555	B
167	R	0.596666666667	B
168	L	0.627333333333	B
169	D	0.631	B
170	V	0.624888888889	B
171	L	0.613444444444	B
172	G	0.579444444444	B
173	S	0.553555555556	B
174	P	0.517666666667	B
175	P	0.491222222222
176	L	0.455111111111
177	A	0.431888888889
178	I	0.400222222222
179	G	0.378888888889
180	L	0.355
181	A	0.349222222222
182	V	0.355222222222
183	G	0.362222222222
184	A	0.359111111111
185	G	0.351555555556
186	H	0.346333333333
187	L	0.363111111111
188	M	0.372666666667
189	V	0.386
190	I	0.390777777778
191	G	0.392777777778
192	Y	0.394
193	T	0.406777777778
194	G	0.424
195	A	0.429666666667
196	S	0.423777777778
197	M	0.422333333333
198	N	0.417888888889
199	T	0.414222222222
200	A	0.398222222222
201	R	0.392
202	T	0.380444444444
203	F	0.364777777778
204	G	0.357444444444
205	P	0.367555555556
206	A	0.375
207	V	0.389444444444
208	I	0.407111111111
209	S	0.441222222222
210	G	0.458888888889
211	A	0.488111111111
212	F	0.519333333333	B
213	D	0.538555555556	B
214	D	0.533222222222	B
215	H	0.513333333333	B
216	W	0.488222222222
217	V	0.456666666667
218	Y	0.431888888889
219	W	0.408777777778
220	L	0.384222222222
221	G	0.356
222	P	0.347
223	I	0.345
224	G	0.346777777778
225	G	0.344888888889
226	G	0.338222222222
227	I	0.330555555556
228	L	0.333444444444
229	A	0.328555555556
230	G	0.340444444444
231	F	0.342888888889
232	V	0.326555555556
233	Y	0.333444444444
234	Q	0.364777777778
235	Y	0.404666666667
236	V	0.435555555556
237	L	0.469555555556
238	S	0.500777777778	B
239	A	0.516777777778	B
240	P	0.535888888889	B
241	P	0.575111111111	B
242	I	0.595444444444	B
243	S	0.594888888889	B
244	F	0.598333333333	B
245	E	0.603888888889	B
246	A	0.591333333333	B
247	L	0.585888888889	B
248	D	0.581111111111	B
249	K	0.579111111111	B
250	A	0.572777777778	B
251	Q	0.570222222222	B
252	L	0.571555555556	B
253	A	0.575222222222	B
254	C	0.572	B
255	L	0.580444444444	B
256	A	0.576888888889	B
257	R	0.596777777778	B
258	F	0.610666666667	B
259	H	0.619444444444	B
260	N	0.625888888889	B
261	K	0.637666666667	B
262	E	0.641888888889	B
263	A	0.649666666667	B
264	V	0.645222222222	B
265	E	0.647777777778	B
266	D	0.627333333333	B
267	R	0.606222222222	B
268	T	0.536666666667	B
269	T	0.468888888889
270	A	0.393222222222
271	I	0.317555555556

[truncated: 10 more sheets: BepiPred 1.0, ABCpred, BcePred,  Ellipro (non-linear B), MHC I Pig, MHC I Pig list, MHC II Human, MHC II Mouse, NetChop, PCPS]
