# Supplementary material for: First Data on Ornithodoros moubata Aquaporins: Structural, Phylogenetic and Immunogenic Characterisation as Vaccine Targets
Source: Pathogens. 2022 Jun 16;11(6):694. doi: 10.3390/pathogens11060694 (PMC9227307; doi:10.3390/pathogens11060694)
Supplement: Supplementary file 1 [file pathogens-11-00694-s001.zip › Table S11.xlsx]

## Sheet: Hoja1
Table S11. Physicochemical, allergenic and toxic properties of the selected antigenic peptides.
Extracellular domain	Clade	AQP	Peptide name	Peptide sequence	Length (aa)	Molecular weight (Da)	pI	Instability indexa	Aliphatic indexb (thermostability)	GRAVYc	Solubilityd (Protein-Sol)	Crystalization propensity (CRYSTALP2)	Allergenicitye (AllergenFP /AllerTop/ AllerCatPro)	Hemolitic Potencyf (HemoPI, all five SVM prediction methods)	Toxicity predictione (ToxinPred, four SMV prediction methods)	Anti-angiogenic propertye (AntiAngioPred, two prediction methods)
Loop C	AQP9-like	OmAQP90	OmAQP90_C	RDAINMFDGGVRSVVGPTGTASIFSTYPREG	31	3258.61	6.12	25.15	59.68	-0.187	0.486	crystallizable	N, N, N	0.00/ 0.49/ 0.43/ 0.00/ 0.49	N, N, N, N	N, N
		Om20812	Om20812_C	RDAIDAVDSGVRSVLGPTGTAPIFATYPREG	31	3189.53	4.68	27.50	78.71	-0.113	0.713	crystallizable	Y, N, N	0.00/ 0.48/ 0.33/ 0.00/ 0.48	N, N, N, N	N, N
		Om22982	Om22982_C
	AQP7-like	OmAQP23	OmAQP23_C	KGAFDNYDGGFRATTGVNGTADVFASYPRDF	31	3317.53	4.58	5.85	31.61	-0.523	0.655	crystallizable	N, Y, N	0.00/ 0.49/ 0.48/ 0.00/ 0.49	N, N, N, N	N, N
		OmAQP15	OmAQP15_C
	AQP7/AQP9/AQP3	OmAQP97	OmAQP97_C	NYIDALDHYDGGERQIFGDRGTGILLTTFPNEH	33	3736.03	4.51	38.03	73.94	-0.694	0.670	crystallizable	Y, Y, N	0.00/ 0.47/ 0.55/ 0.83/ 0.47	N, N, N, N	Y, N
	AQPAe.a	OmAQP91	OmAQP91_C	AVTPEERQGLLGGTALSEGVTPFQG	25	2514.77	4.25	47.45	78.00	-0.156	0.720	crystallizable	N, N, N	0.00/ 0.49/ 0.49/ 0.00/ 0.49	N, N, N, N	N, N
Loop E	AQP9-like	OmAQP90	OmAQP90_E	SYNCMAALNPARDIGPRVFTAVAGWGSEVFSFRNYQ	36	3996.49	7.92	33.19	59.72	-0.078	0.533	non-crystallizable	N, Y, N	0.00/ 0.46/ 0.46/ 0.00/ 0.46	N, N, N, N	Y, N
		Om20812	Om20812_E	SYNCMAPLNPARDLGPRVFTAIAGWGMEVFSVRDY	35	3905.48	5.84	30.32	69.71	0.029	0.486	crystallizable	N, Y, N	0.00/ 0.45/ 0.35/ 0.00/ 0.45	N, N, N, N	N, N
		Om22982	Om22982_E
	AQP7-like	OmAQP23	OmAQP23_E	PLNPARDLGPRIFTAMAGWGTEVFSFRDYN	30	3399.83	6.54	20. 97	58.67	-0.313	0.436	crystallizable	N, Y, N	0.00/ 0.46/ 0.47/ 0.00/ 0.46	N, N, N, N	N, N
		OmAQP15	OmAQP15_E
	AQP7/AQP9/AQP3	OmAQP97	OmAQP97_E	NPARDFPPRVLASIVGYGPEVFTYRH	26	2959.36	8.59	19.46	71.15	-0.323	0.579	non-crystallizable	N, N, N	0.00/ 0.48/ 0.32/ 0.00/ 0.48	N, N, N, N	N, N
	AQPAe.a	OmAQP91	OmAQP91_E	ASMNTARTFGPAVISGAFDDH	21	2165.36	5.21	22.36	51.43	-0.010	0.497	crystallizable	N, N, N	0.00/ 0.51/ 0.61/ 0.00/ 0.51	N, N, N, N	Y, N
Loop C		RmAQP2	Peptide 2	ADALSQVDVNLAIVYGTNATAPVFSCFPAPGV	32	3208.63	3.56	31.27	100.63	0.769	0.692	non-crystallizable	N, N, N	0.00/ 0.46/ 0.53/ 0.00/ 0.46	N, N, N, N	N, N
Loop E		RmAQP2	Peptide 3	MCGWGSAVFSFRSYNWFWV	19	2330.67	7.98	23.71	35.79	0.411	n.d.	crystallizable	N, N, N	0.73/ 0.49/ 0.41/ 0.00/ 0.49	N, N, N, N	Y, Y
	a Instability index: > 40, likely unstable; < 40, likely stable.
	baliphatic index: is the relative volume of a protein occupied by aliphatic side chains of proteins. The index may be regarded as a positive factor for the increase of thermostability.
	cGRAVY (hydropaticity index): range from -2 to +2 for most proteins, with the negatively rated proteins being more hydrophilic.
	d Solubility: any scaled solubility value greater than 0.45 is predicted to have a higher solubility than the average soluble E. coli protein from the experimental solubility dataset Niwa et al., 2009, PNAS 106 (11) 4201-4206.
	e N (non), represents low probability; Y (yes), represents high probability
	f SVM scores range between 0 and 1, with 1 very likely to be hemolytic , 0 very unlikely to be hemolytic.
	n.d.: not determined, the peptide was shorter then the minimun lenght required.
